# Supplementary material for: Screening method and metabolic analysis of plant anti-aging microorganisms via ammonia-induced senescence in the duckweed Wolffia microscopica
Source: Front Plant Sci. 2024 Nov 13;15:1480588. doi: 10.3389/fpls.2024.1480588 (PMC11605829; doi:10.3389/fpls.2024.1480588)
Supplement: Supplementary file 2 [file Table2.xlsx]

## Sheet: Table S2
Supplementary Table S2. Identification of metabolites in the filter-sterilized fermented medium
Metabolite Name	RT(min)	Precursor m/z	Height	Area	Relative	AdductIon	Ion mode	InChIKey	Superclass	Class	Subclass	MS/MS	MS1 isotopes	MSMS spectrum	Total score
3-Hydroxypropanoic acid	0.343533	89.0246	182756	1398822	48589.7	[M-H]-	Negative	ALRHLSYJTWAHJZ-UHFFFAOYSA-N	Organic acids and derivatives	Hydroxy acids and derivatives	Beta hydroxy acids and derivatives	TURE	88.98852:1052 89.02457:214914 90.02743:6109 90.93623:305 91.02644:1101 91.03731:1000 91.95758:236 92.92819:2325 93.01776:464 94.01821:3929	59.96671:222 74.99115:1009	988.07
3-Methyladenine	0.333317	150.077	240688	847814	29449.8	[M+H]+	Postive	FSASIHFSFGAIJM-UHFFFAOYSA-N	Organoheterocyclic compounds	Imidazopyrimidines	Purines and purine derivatives	TURE	149.95177:782 149.99734:617 150.05365:1209 150.07683:416856 150.51285:254 150.94197:1411 151.00096:304 151.05225:279 151.08017:26534 151.14461:394 152.06252:298 152.08096:936 152.98814:768 153.05336:343 153.09084:314 153.95749:332 154.0976:1466 154.96465:396 155.07121:625	55.0293:252 69.04436:1019 82.03972:1413 96.0552:2077 108.04288:1044 108.05514:530 109.05136:2052 123.06595:3606 124.07019:285 133.05051:4232 134.05319:432 135.0536:738 150.07712:21347 150.12369:348	795.796	1.35306e+07
1(2H)-Naphthalenone, 2,7-bis(acetyloxy)-4-[(3E)-2,5-bis(acetyloxy)-3-methyl-3-penten-1-yl]octahydro-4a,8,8-trimethyl-3-methylene-	7.5778	543.261	125770	765723	26598.3	[M+H]+	Postive	STOYMKJWHHPSDH-UHFFFAOYNA-N	Lipids and lipid-like molecules	Prenol lipids	Diterpenoids	TURE	543.26117:130488 544.26434:40422 545.07172:352 545.25977:73853 546.26196:20008 547.25861:8675 548.25745:2259	145.00568:237 301.07904:451 302.9184:614 303.09561:4855 304.09781:370 304.91431:772 305.09286:1362 331.10382:228 362.07852:325 363.07547:247 402.20145:527 428.19772:209 444.15466:988 445.1597:386 446.1543:535 475.28775:264 509.27167:1220 510.27631:587 511.27023:1075 512.26953:239 543.26172:45041	868.833
Oxymetazoline hydrochloride	6.84145	261.194	185556	544962	18929.9	[M+Na]+	Postive	WYWIFABBXFUGLM-UHFFFAOYSA-N	Benzenoids	Benzene and substituted derivatives	Xylenes	TURE	261.13678:671 261.19388:189242 262.19727:25895 263.0871:235 263.16147:360 263.2001:2470 263.91891:214 264.23193:14906 265.13098:223 265.1799:402 265.21091:405 265.23651:2504 265.90662:334	219.17482:6901 261.19284:558	884.188
Monoisobutyl phthalate	4.59137	221.082	62229.4	517278	17968.3	[M-H]-	Negative	RZJSUWQGFCHNFS-UHFFFAOYSA-N	Benzenoids	Benzene and substituted derivatives	Benzoic acids and derivatives	TURE	221.0192:255 221.08205:64884 221.79811:324 221.84261:2650 222.08583:7881 222.83302:517 223.0284:346 223.08829:942 223.83864:502 224.83107:245 224.87491:228 225.11243:251 225.79369:361	71.05051:521 77.03958:5093 107.04885:380 121.02757:922 123.90094:295 134.0372:414 176.83301:210 180.94551:216 203.83034:1179	994.871
Sparteine-15-carboxylic acid	5.4304	279.204	128554	424586	14748.5	[M+H]+	Postive	FNCNQQDYISRCJG-UHFFFAOYNA-N	Alkaloids and derivatives	Lupin alkaloids	Sparteine, lupanine, and related alkaloids	TURE	279.16556:232 279.20428:134358 279.94986:214 280.1506:404 280.20734:19051 281.13919:301 281.17163:449 281.20956:2617 281.24365:468 282.27811:845 283.18887:392 283.22592:479 283.26126:426 284.07547:214	94.07265:228 279.20374:7682	874.41
[6-hydroxy-1,1,4a,6-tetramethyl-5-[(2-oxochromen-7-yl)oxymethyl]-3,4,5,7,8,8a-hexahydro-2H-naphthalen-2-yl] acetate	7.61652	460.27	97725.3	368170	12788.8	[M+H]+	Postive	RIPKCRCUFJSKKD-UHFFFAOYNA-N	Phenylpropanoids and polyketides	Coumarins and derivatives		TURE	460.17831:289 460.27005:102156 460.96402:291 461.27301:28138 462.27518:4674 463.27957:640 464.14233:1571 465.14767:248 465.24426:267 465.26703:248	119.08498:5813 120.08715:691 135.08067:1038 136.08267:267 147.06439:256 281.13681:267 415.21072:392 416.21103:559	991.28
(5xi,8alpha,9xi,10alpha)-14-Acetoxy-15-{[(2Z)-2-methyl-2-butenoyl]oxy}kaur-16-en-18-oic acid	3.56412	476.307	169199	360017	12505.6	[M+NH4]+	Postive	ALSZHZPQTCVXIR-UHFFFAOYNA-N	Lipids and lipid-like molecules	Prenol lipids	Diterpenoids	TURE	476.30667:171849 477.24323:323 477.31009:40170 477.42026:725 478.31204:7833 479.31226:1350 479.40759:275 479.4469:349 480.51608:208 481.13885:209 481.26236:27771	87.04375:570 89.05955:11112 90.06538:377 91.07507:267 117.09064:266 131.06918:794 133.08606:10068 134.08846:766 135.10109:327 177.11195:3296 178.11444:532 221.13808:436 265.1665:514 415.25772:327 459.2774:1587 460.28049:264	811.029
1-Naphthalenecarboxylic acid, 8-(benzoyloxy)decahydro-7-hydroxy-5-[(3Z)-5-hydroxy-3-methyl-3-penten-1-yl]-1,4a-dimethyl-6-methylene-	7.61652	474.286	85449.9	290861	10103.4	[M+H]+	Postive	ZBHRERABGSTQPS-UHFFFAOYNA-N	Lipids and lipid-like molecules	Prenol lipids	Diterpenoids	TURE	474.28586:90629 475.14368:225 475.2879:26438 475.4054:386 476.29068:5126 477.24652:215 477.29398:953 479.16547:637	59.06073:290 60.05532:980 60.08095:32728 60.10995:833 61.08404:886 62.0876:205 119.0842:278 126.9972:234	992.578
9,10-DiHOME	10.6655	313.238	32144.1	262764	9127.42	[M-H]-	Negative	XEBKSQSGNGRGDW-JXMROGBWSA-N	Lipids and lipid-like molecules	Fatty Acyls	Fatty acids and conjugates	TURE	313.23846:38102 314.01135:205 314.24103:7396 315.246:920 316.01569:216 316.80322:254 316.89993:236 316.92221:412	61.98824:292 75.00863:5677 146.96365:324 255.23245:3520 256.23505:883	996.042
C10-LAS (TENTATIVE)	9.52567	297.153	21134.5	237620	8254.02	[M-H]-	Negative	NANHIUZYPFDGJS-UHFFFAOYSA-N	Benzenoids	Benzene and substituted derivatives	Benzenesulfonic acids and derivatives	TURE	296.98074:1991 297.15283:24199 297.2164:406 298.15637:5441 299.15079:1836 301.88708:509	68.99538:928 79.95576:427 81.95267:221 112.98511:798 183.01097:1414 184.01779:444 197.02615:220 198.0336:227 297.1525:9501	843.379
3,4,7-Trihydroxy-7-methyl-2-[(1E)-1-propen-1-yl]-2,3,4,7-tetrahydro-5H-furo[3,4-b]pyran-5-one	4.21002	243.088	88715.8	216319	7514.09	[M+H]+	Postive	HKZCFYIVMLZKKX-UHFFFAOYNA-N	Organoheterocyclic compounds	Dihydrofurans	Furanones	TURE	243.03661:292 243.08765:89983 244.09026:9957 244.16335:363 245.09494:1109 246.16913:227 247.07608:747 247.13171:516 247.94296:1613	103.05204:230 104.95834:215 145.07631:255 170.07074:342 172.08644:5958 173.0899:1096 198.0659:5635 199.06824:1429 200.08102:748 201.08513:244 226.06326:354 226.07784:254 243.08775:9189	957.324
[(1S,4aS,6S,7R,7aS)-4-methoxycarbonyl-7-methyl-1-[(2S,3R,4S,5S,6R)-3,4,5-trihydroxy-6-(hydroxymethyl)oxan-2-yl]oxy-1,4a,5,6,7,7a-hexahydrocyclopenta[c]pyran-6-yl] (1S,4aS,6S,7R,7aS)-6-acetyloxy-7-methyl-1-[(2S,3R,4S,5S,6R)-3,4,5-trihydroxy-6-(hydroxymethyl)oxan-2-yl]oxy-1,4a,5,6,7,7a-hexahydrocyclopenta[c]pyran-4-carboxylate	2.95448	808.332	63124.2	199981	6946.57	[M+H]+	Postive	YDHSGSSEZHFAJJ-UHFFFAOYNA-N	Lipids and lipid-like molecules	Prenol lipids	Terpene glycosides	TURE	808.33148:62076 808.82812:585 809.08417:222 809.33368:27462 810.33521:5612 811.33868:1380 812.33624:309	113.05946:267 538.17084:392 808.32977:6549	893.149
Dodemorph	9.6096	282.279	67204.2	177385	6161.68	[M+H]+	Postive	JMXKCYUTURMERF-UHFFFAOYSA-N	Organoheterocyclic compounds	Oxazinanes	Morpholines	TURE	282.27866:109788 283.28229:20600 284.285:2072 284.33273:261	55.01647:303 55.05428:8752 56.05777:326 57.06987:2998 60.08049:604 67.05457:965 69.06991:2646 72.04491:619 81.06981:632 83.08628:1457 86.09633:356 93.06932:607 95.08549:275 97.06347:373 100.07708:209	989.188
Methyl 3-[(1E,3E)-3,5-dimethyl-1,3-heptadien-1-yl]-8-hydroxy-6a,8-dimethyl-6-oxo-6a,8,9,9a-tetrahydro-6H-furo[2,3-h]isochromene-9-carboxylate	7.9619	437.194	53855.8	167746	5826.86	[M+Na]+	Postive	VYXBNIDRQOAAHX-UHFFFAOYNA-N	Organic oxygen compounds	Organooxygen compounds	Carbonyl compounds	TURE	436.95453:1003 437.19394:54728 437.95343:304 438.19659:14388 438.40314:346 438.94977:292 439.16302:630 439.20093:2555 439.43997:309 440.19757:351 440.33954:253 441.30228:219 441.35773:236	97.09879:241 230.98277:210 251.04576:1778 253.04668:276 296.10455:242 303.12018:837 310.02719:481 392.10678:430 437.19312:13626	997.63
2H-Oxireno[1,10a]phenanthro[3,2-b]furan-10(11bH)-one, 5,7-bis(acetyloxy)-3,3a,4,5,6,7,7a,7b,8,8a-decahydro-4,4,7a,11-tetramethyl-, (1aS,3aR,5S,7S,7aR,7bS,8aR,11bR)-	7.26278	415.212	51086.7	145561	5056.22	[M-H2O+H]+	Postive	YOELDOOOBJSHSZ-UHFFFAOYNA-N	Organoheterocyclic compounds	Naphthofurans		TURE	415.16187:328 415.21185:51651 416.21542:14170 416.29849:272 417.15488:226 417.21664:2718 418.21948:537 418.88461:252 419.2338:217 419.28229:251	69.03394:247 91.05306:217 107.08402:262 111.04426:253 119.08566:25706 119.12495:513 120.0885:2176 121.09097:285 135.08015:1744 136.0849:276	855.985
NCGC00384502-01	6.88908	425.125	36434	136768	4750.79	[M+H]+	Postive	CDZUQIFWCXAIFB-UHFFFAOYNA-N	Phenylpropanoids and polyketides	Isoflavonoids	Rotenoids	FALSE	425.12552:65780 426.12784:17736 426.3208:211 426.39221:320 427.12683:6956 427.19653:335 427.33655:204 428.12976:1116 428.4007:262 429.1221:305		943.439
Adenosine (not validated); PlaSMA ID-1193	0.359583	268.105	29989.9	131413	4564.79	[M+H]+	Postive	OIRDTQYFTABQOQ-UHFFFAOYNA-N	Nucleosides, nucleotides, and analogues	Purine nucleosides		TURE	267.61606:226 267.6366:419 267.80914:210 267.90817:248 268.10474:87678 268.65512:271 268.79214:259 268.89786:256 269.02679:407 269.10733:10517 269.1601:9007 269.20731:1442 269.24261:529 269.27213:279 269.64926:203 270.04898:229 270.10995:1585 270.1702:988 270.6514:600 271.08215:316 271.16531:3656 271.22302:356 271.2626:293 271.6651:1157 271.75998:246 271.8667:304 272.12045:318 272.17111:1684 272.…	55.01797:376 55.05341:225 56.02054:232 57.03363:623 60.05446:223 67.05325:290 69.03432:201 69.07122:221 70.06544:798 71.06862:289 72.04198:208 73.02785:502 84.08092:341 85.02839:340 86.09508:298 97.02958:207 110.0716:3798 112.07737:413 115.04067:291 119.03627:362 120.08023:350 121.08441:233 131.0296:255 136.06219:46935 137.06372:3992 138.09113:821 140.10594:505 152.05727:2695 156.07593:501 169.13…	842.347
Ginkgolide A	6.88908	409.151	34568.8	130016	4516.24	[M+Na]+	Postive	FPUXKXIZEIDQKW-UHFFFAOYNA-N	Lipids and lipid-like molecules	Prenol lipids	Terpene lactones	FALSE	409.15097:65733 410.15353:14438 411.15805:1902 412.15762:483 412.29886:245 412.33627:252 413.16617:225 413.27866:221		980.118
L-Norvaline	0.309117	118.087	27877.9	124010	4307.62	[M+H]+	Postive	SNDPXSYFESPGGJ-BYPYZUCNSA-N	Organic acids and derivatives	Carboxylic acids and derivatives	Amino acids, peptides, and analogues	TURE	118.01353:443 118.06278:585 118.08672:31570 119.02858:3557 119.08956:1832 119.10415:5397 119.58231:227 119.97926:401 120.01144:592 120.06491:572 120.1022:8540 121.02217:374 121.05089:3717 121.10415:473 121.97512:251 122.08147:1146 122.96323:766 122.97443:318 123.08038:245	58.065:8018 59.07037:455 67.02944:268 94.03933:345	997.293
lysoDGTS 22:7	9.42603	544.362	33951.9	105767	3673.92	[M+H]+	Postive	FLPRVADKZDTTPP-XOXGXCDANA-N	Organic acids and derivatives	Carboxylic acids and derivatives	Amino acids, peptides, and analogues	TURE	544.25787:233 544.36255:36507 545.36591:11240 545.52289:235 546.37158:3038 546.85095:249 547.37781:351 549.24231:345	59.06053:1608 60.0566:1006 60.08092:35342 60.10999:875 61.08374:1236	971.385
Eplerenone	7.78627	415.213	41347.1	101608	3529.47	[M+H]+	Postive	JUKPWJGBANNWMW-RZVCPIHASA-N	Lipids and lipid-like molecules	Steroids and steroid derivatives	Steroid lactones	FALSE	415.21259:39236 415.31686:664 416.21585:12389 416.29181:296 417.22153:2014 417.33359:222 418.22357:256		979.527
4-Hydroxyquinoline	3.8839	144.045	29574.4	98644.5	3426.53	[M-H]-	Negative	PMZDQRJGMBOQBF-UHFFFAOYSA-N	Organoheterocyclic compounds	Quinolines and derivatives	Quinolones and derivatives	TURE	143.86504:675 143.91536:9719 143.97963:208 144.04524:32064 144.10951:368 144.91583:988 144.94577:257 144.99132:431 145.04924:3154 145.91304:340 145.92517:260 146.02232:345 146.05247:541 146.90662:509 146.96385:611 149.00897:315 149.02271:268	57.97472:452 99.92581:3808 100.92478:664 101.92385:397 115.04339:580 116.05093:1254 126.03445:562 142.02711:398 144.04498:11879	897.06
DGTS 32:7	11.4285	698.498	25723.3	96264.6	3343.86	[M+H]+	Postive	XEQUVSTWJHHBGB-YLQHIMDBSA-N	Lipids and lipid-like molecules	Glycerolipids	Triradylcglycerols	TURE	698.49805:27925 698.87195:211 699.50201:15381 699.64307:209 699.79736:240 700.50372:3433 701.4082:625 701.50439:754 702.52319:265 702.86127:546	71.08492:215 91.05373:212 111.04378:260 119.0854:3492 120.08848:691 135.0782:217	958.586
(4alpha,5alpha,6beta,8alpha,9beta,13alpha,14beta,16beta,17Z)-6,16-Diacetoxy-4,8,14-trimethyl-3,7-dioxo-18-norcholesta-1,17,24-trien-21-oic acid	8.38123	567.296	19898.1	94488.1	3282.15	[M-H]-	Negative	MDFZYGLOIJNNRM-UHFFFAOYNA-N	Lipids and lipid-like molecules	Steroids and steroid derivatives	Steroid esters	TURE	567.29584:24630 567.38306:319 567.71954:271 568.29932:10759 569.30188:1908 570.30652:556	59.01356:5596 60.01744:361 135.08093:598 161.06261:374 217.12384:784 323.16461:224 333.18753:232	970.547
Glycylleucine; PlaSMA ID-549	5.5226	189.123	25771	82518.3	2866.37	[M+H]+	Postive	DKEXFJVMVGETOO-MDOHGIEYNA-N	Organic acids and derivatives	Carboxylic acids and derivatives	Amino acids, peptides, and analogues	FALSE	189.02869:213 189.07874:262 189.1232:26723 189.5713:217 189.97243:283 189.98781:240 190.1254:2665 190.94489:645 190.97356:750 191.04726:518 191.13152:421 193.04515:207 193.08408:458 193.13269:474 193.15643:290 193.19487:282 193.93021:218 194.11711:687		998.015
Adenine	0.342317	136.061	17646.7	80910.2	2810.51	[M+H]+	Postive	GFFGJBXGBJISGV-UHFFFAOYSA-N	Organoheterocyclic compounds	Imidazopyrimidines	Purines and purine derivatives	TURE	135.92647:229 136.06148:22192 136.10661:505 136.99431:778 137.06348:1906 137.09558:409 137.96365:655 138.05725:293 138.96509:796 138.99042:446 139.0486:797 139.08325:919 139.11198:499 139.9225:519 139.96344:893 139.98512:418 140.08124:1176 140.95654:940 140.99342:596 141.05405:629	55.02819:227 78.04533:205 78.95377:228 79.94608:220 81.93681:925 82.03838:295 94.03976:386 119.03476:4720 120.03457:263 120.95177:333 121.04037:227 136.06107:3659	856.607
5-[5-(acetyloxymethyl)-1,2,4a-trimethyl-7-oxo-3,4,8,8a-tetrahydro-2H-naphthalen-1-yl]-3-methylpentanoic acid	4.2623	379.25	30694.2	80658.6	2801.77	[M+NH4]+	Postive	OLDFOHABNQZMKB-UHFFFAOYNA-N	Lipids and lipid-like molecules	Prenol lipids	Diterpenoids	TURE	379.25012:35579 379.35178:693 379.7507:13866 379.82135:361 380.25311:5380 380.35654:222 380.75461:697 381.0423:225 381.12271:337 381.20059:1428 381.25043:421 381.29837:558 381.33401:808 381.3703:378 381.72702:17223 382.19342:300 382.2287:7618 382.73328:1482 383.22745:548 383.31281:352 383.35107:234 384.20581:3103	67.01579:541 71.04893:240 73.0282:1427 80.0542:879 87.04398:709 89.05931:10990 89.09475:227 90.0621:673 102.06658:1395 102.56849:347 124.07963:899 124.58161:221 131.06953:442 133.08557:4371 134.09009:520 177.11244:776 199.12445:241 221.1376:423	858.939
S-(5'-ADENOSYL)-L-HOMOCYSTEINE	0.359583	385.13	19230.4	79969.7	2777.84	[M+H]+	Postive	ZJUKTBDSGOFHSH-UHFFFAOYNA-N	Nucleosides, nucleotides, and analogues	5'-deoxyribonucleosides	5'-deoxy-5'-thionucleosides	TURE	384.67972:254 384.71558:269 385.08374:241 385.1297:51006 385.63922:262 385.72418:374 385.82651:244 386.13245:10277 386.21228:580 386.23886:415 386.67325:317 386.90802:272 387.12738:3338 387.18948:632 387.22415:434 387.71097:215 388.13354:593 388.17371:586 388.2149:397 388.25522:685 389.10757:221 389.23679:627 389.41162:309	85.02724:305 88.02118:1580 97.02829:471 97.10236:238 99.04311:393 134.02669:9976 135.02992:500 136.02322:535 136.03859:261 136.06129:14585 136.10374:250 137.06453:860 150.07822:216 181.15648:232 250.07402:771	916.214
3-[4-({2-[(2E)-2-Buten-2-yl]-6,8-dimethyl-1,2,4a,5,6,7,8,8a-octahydro-1-naphthalenyl}carbonyl)-3-hydroxy-5-oxo-2,5-dihydro-1H-pyrrol-2-yl]-2-hydroxy-2-methylpropanoic acid	7.61652	446.253	17909	76548.4	2659	[M+H]+	Postive	ZLIYAXUPOBJNFP-UHFFFAOYNA-N	Lipids and lipid-like molecules	Prenol lipids	Sesquiterpenoids	FALSE	446.25333:18302 447.09283:265 447.25693:5811 448.26175:1111 449.39679:220 449.42636:224 450.35788:210		981.05
Bupivacaine	7.90473	289.226	26199	74176.9	2576.62	[M+Na]+	Postive	LEBVLXFERQHONN-UHFFFAOYSA-N	Organic acids and derivatives	Carboxylic acids and derivatives	Amino acids, peptides, and analogues	TURE	288.93497:243 289.16626:315 289.22568:28583 290.07553:6616 290.22824:4304 290.28174:287 291.07709:954 291.23373:500 292.07416:2769 293.07001:325 293.17078:218 293.21002:354 293.24121:216 294.06842:371	121.9128:430 132.98251:444 166.97078:355 247.03221:496 249.04691:1845 251.04541:1022 289.22424:1201	654.794
Isoleucylleucine; PlaSMA ID-1024	2.20312	245.186	20730.4	72393.8	2514.68	[M+H]+	Postive	BCVIOZZGJNOEQS-UHFFFAOYNA-N	Organic acids and derivatives	Carboxylic acids and derivatives	Amino acids, peptides, and analogues	TURE	245.13918:283 245.18639:22007 245.2674:217 246.12914:215 246.18974:2734 246.86572:217 246.94698:523 247.20018:344 247.50591:209 247.88806:228 247.94283:1763 248.98784:409 249.15637:1449 249.94148:738 249.99139:211 250.14154:250 250.15828:257	69.07022:582 85.0294:234 86.0971:7573 87.09985:427 144.91832:231 188.90511:1027	992.736
Coumaroyl agmatine (isomer of 1296); PlaSMA ID-1297	6.83938	277.168	21117.3	71520.9	2484.36	[M+H]+	Postive	AKIHYQWCLCDMMI-UHFFFAOYSA-N	Phenylpropanoids and polyketides	Cinnamic acids and derivatives	Hydroxycinnamic acids and derivatives	TURE	277.16782:24991 277.24911:481 277.86014:266 278.17081:4091 278.73813:222 279.09457:911 279.16718:2014 280.16699:364 280.23364:243 281.13159:289 281.18289:495 281.21008:463 281.24899:685	81.06995:223	988.74
5-Heptenoic acid, 2-[(4alpha,5alpha,6beta,8alpha,9beta,13alpha,14beta,16beta,17E)-16-(acetyloxy)-6-hydroxy-4,8,10,14-tetramethyl-3,7-dioxogon-1-en-17-ylidene]-6-methyl-, (2E)-	7.78072	525.285	15342.6	70866.8	2461.64	[M-H]-	Negative	ZGQQEJUGWPCCHA-UHFFFAOYNA-N	Lipids and lipid-like molecules	Steroids and steroid derivatives	Steroid esters	FALSE	525.28461:15965 526.28979:4869 527.29279:1762 528.29608:408 529.22089:203		962.599
Adenosine	0.4554	268.105	28418.6	70459.4	2447.49	[M+H]+	Postive	OIRDTQYFTABQOQ-KQYNXXCUSA-N	Nucleosides, nucleotides, and analogues	Purine nucleosides		FALSE	268.1048:28378 268.16415:581 268.19473:334 268.89896:293 268.92096:530 269.10736:3696 269.1702:685 269.21048:956 269.24893:585 269.28622:303 270.11279:406 270.21677:212 271.19162:329 271.22702:557 271.25781:219 272.18399:395 272.23273:542 272.25473:305 272.95117:410		997.781
N-Methyltyrosine	7.49697	194.082	20430	68616.5	2383.47	[M-H]-	Negative	AXDLCFOOGCNDST-UHFFFAOYNA-N	Organic acids and derivatives	Carboxylic acids and derivatives	Amino acids, peptides, and analogues	FALSE	193.81587:4693 193.85477:575 194.08223:22448 194.13358:448 195.08499:2392 195.13695:349 195.8109:81876 196.8116:2201 197.11789:215 197.74507:268 197.77258:245 197.80811:110382 198.80762:1807		992.957
Acetominophen	2.1624	150.056	16927.8	68147.5	2367.18	[M-H]-	Negative	RZVAJINKPMORJF-UHFFFAOYSA-N	Benzenoids	Phenols	1-hydroxy-2-unsubstituted benzenoids	FALSE	150.05595:17684 150.10152:319 150.12164:221 151.05922:1571 151.87338:971 152.06273:247 152.92789:270 153.01874:238 153.8685:18581 153.91428:303 154.86903:2620 154.97469:1647		996.077
methyl 4,10-diacetyloxy-5-hydroxy-1,4a-dimethyl-9-oxo-7-propan-2-yl-3,4,10,10a-tetrahydro-2H-phenanthrene-1-carboxylate	7.92917	459.202	14555.6	62455.5	2169.46	[M-H]-	Negative	FQBKTTHDWBBWHB-UHFFFAOYNA-N	Lipids and lipid-like molecules	Prenol lipids	Diterpenoids	TURE	459.20184:21140 459.30316:242 460.20505:6025 461.20914:1169	85.02862:266	992.221
[5-acetyloxy-1,7-bis(3,4-dihydroxyphenyl)heptan-3-yl] acetate	6.8719	431.171	21103.4	61712.4	2143.65	[M-H]-	Negative	BWSFBLYFHGZBRQ-UHFFFAOYNA-N	Phenylpropanoids and polyketides	Diarylheptanoids	Linear diarylheptanoids	FALSE	431.17093:18191 432.17358:5842 433.17529:815 433.21463:205		974.587
(3E)-7-Hydroxy-3,7-dimethyl-3-octen-1-yl 6-O-(6-deoxy-alpha-L-mannopyranosyl)-beta-D-glucopyranoside	3.56412	481.262	27907.9	60636.9	2106.29	[M+Na]+	Postive	VUGMGEQWBOCMAV-UHFFFAOYNA-N	Lipids and lipid-like molecules	Fatty Acyls	Fatty acyl glycosides	TURE	481.13885:209 481.26236:27771 481.37897:304 481.4209:241 482.26617:6319 483.26633:1210 483.32861:299 484.30115:258 484.43826:322	481.26138:14119	968.105
Di-n-butyl phthalate	9.06162	279.159	18806.5	58040.3	2016.1	[M+H]+	Postive	DOIRQSBPFJWKBE-UHFFFAOYSA-N	Benzenoids	Benzene and substituted derivatives	Benzoic acids and derivatives	TURE	279.159:20805 279.22455:520 279.26468:210 280.16241:3340 280.26193:540 281.16702:532 281.21011:350 281.24472:490 282.24124:224 282.28055:1333 283.22763:491 283.2861:541	57.06993:2314 67.05444:255 83.08514:277 121.02827:285 149.02364:9663 150.02789:844	856.959
Palmitoylcarnitine cation	9.36093	398.327	19057.5	55958.9	1943.8	[M-H]-	Negative	XOMRRQXKHMYMOC-UHFFFAOYNA-N	Lipids and lipid-like molecules	Fatty Acyls	Fatty acid esters	TURE	398.21118:225 398.32715:25839 398.43326:246 399.33112:5166 400.33517:586	61.98676:242	968.996
C21H32O9	6.88908	446.242	13394	52046.2	1807.88	[M+H]+	Postive	HYMAKZYMIDUXML-UHFFFAOYNA-N	Lipids and lipid-like molecules	Prenol lipids	Terpene lactones	FALSE	446.2424:23777 446.32056:549 447.24643:6240 447.37488:223 448.24728:868 448.98819:201 449.09323:210 449.2421:232 449.42148:232 450.98816:416 451.12006:327		909.796
Tramadol	6.48272	264.193	20318.7	50508.3	1754.46	[M+Na]+	Postive	TVYLLZQTGLZFBW-ZBFHGGJFSA-N	Benzenoids	Phenol ethers	Anisoles	TURE	264.19281:22036 264.23132:16933 265.14249:1008 265.19614:3271 265.23431:2336 265.2836:223 266.15115:515 266.16916:345 266.20273:264 266.23813:441 266.90692:219 267.1618:300 267.19254:711 267.23123:687 267.26416:484 268.19678:261 268.93997:215 269.03354:306 269.1734:323	188.9061:448 203.14342:474 204.94693:224 219.17476:7856 220.17781:1319 221.18141:216 225.19667:329 264.19415:265	859.941
Sulfadimidin / sulfamethazin	6.37427	301.075	14361.2	48590.9	1687.86	[M+Na]+	Postive	ASWVTGNCAZCNNR-UHFFFAOYSA-N	Benzenoids	Benzene and substituted derivatives	Benzenesulfonamides	TURE	300.92902:214 301.07507:18972 301.19809:241 301.23608:292 302.07748:3022 302.23096:282 302.91718:10093 303.08655:461 303.91815:1639 304.91501:6173 305.13077:1142 305.91632:735 306.05841:391	55.05402:319 72.99648:315 88.02129:4495	891.932
Ginsenoside Rh3	9.75583	605.446	11388.2	48290.6	1677.43	[M+H]+	Postive	PHLXREOMFNVWOH-WJJFPOJFSA-N				FALSE	605.4455:10515 606.44983:4282 607.45471:962		940.497
DG 35:7	9.47778	614.484	17297.6	47540.7	1651.38	[M+NH4]+	Postive	PKTHUVQDRHGKMO-AFWVMFPMNA-N	Lipids and lipid-like molecules	Glycerolipids	Diradylglycerols	TURE	614.48346:16237 615.48676:6066 616.4884:1459 617.43243:275 617.49329:348 619.43909:4460	89.05956:4205 90.06193:281 133.0858:1089 221.14023:204	848.759
1-[4,5-dihydroxy-6-(hydroxymethyl)-3-[(E)-3-(4-hydroxyphenyl)prop-2-enoyl]oxyoxan-2-yl]oxy-6-hydroxy-7-methylidene-4a,5,6,7a-tetrahydro-1H-cyclopenta[c]pyran-4-carboxylic acid	11.6964	519.148	6830.38	46803.8	1625.78	[M-H]-	Negative	QPNFBUARICHXGG-UHFFFAOYNA-N	Phenylpropanoids and polyketides	Cinnamic acids and derivatives	Hydroxycinnamic acids and derivatives	FALSE	519.14813:6949 520.15179:1509 520.86157:208 520.9104:5222 521.07861:320 521.1485:785 521.40009:592 521.84784:226 521.91486:538 522.15179:237 522.91333:266 523.14728:224		918.083
1H-Indene-4-carboxylic acid, octahydro-3a-hydroxy-3-(hydroxymethyl)-1,1,3,5-tetramethyl-	5.61225	269.176	6678.55	46597.1	1618.6	[M-H]-	Negative	CAKZQSFFOAEEET-UHFFFAOYNA-N	Lipids and lipid-like molecules	Prenol lipids	Monoterpenoids	FALSE	269.17557:8470 270.17938:1346 271.17578:563 272.16418:315 272.19473:280 273.12399:730 273.82678:272 274.04434:752		988.054
D-Alloisoleucine	0.359583	132.102	10961.8	46553.2	1617.08	[M+H]+	Postive	AGPKZVBTJJNPAG-CRCLSJGQSA-N	Organic acids and derivatives	Carboxylic acids and derivatives	Amino acids, peptides, and analogues	TURE	131.93056:1771 132.00334:1012 132.03609:250 132.08009:419 132.10251:33208 133.00819:2361 133.02971:396 133.06281:476 133.10382:2409 133.92633:294 134.02841:1690 134.0762:359 134.11891:356 134.98711:286 135.02252:473 135.05521:201 135.08397:351 135.11745:210 136.03976:246 136.06219:30259 136.11075:894 137.0441:248 137.06508:1777	60.98597:219 62.98204:471 69.06982:1090 72.98584:373 86.09732:1729 88.02177:231 90.90317:440	768.223
Deoxyadenosine; PlaSMA ID-1068	0.359583	252.11	10425.5	46246.8	1606.44	[M+H]+	Postive	OLXZPDWKRNYJJZ-UHFFFAOYNA-N	Nucleosides, nucleotides, and analogues	Purine nucleosides	Purine 2'-deoxyribonucleosides	FALSE	251.65791:635 252.02161:239 252.10973:27166 252.61005:226 252.65843:430 253.11497:3758 253.15781:3171 253.21329:437 253.65187:482 253.80496:247 254.11787:667 254.18568:3720 254.60292:213 254.64314:245 255.04622:601 255.08859:232 255.16336:1194 255.18916:1295 255.23235:825 255.63695:282 256.17328:532 256.19638:433 256.23309:294 256.26474:320 256.64069:654 256.66412:252		995.557
Phenylalanylisoleucine (isomer of 1328); PlaSMA ID-1329	3.2646	279.17	17675.4	44428.2	1543.26	[M+H]+	Postive	JWBLQDDHSDGEGR-UHFFFAOYNA-N	Organic acids and derivatives	Carboxylic acids and derivatives	Amino acids, peptides, and analogues	TURE	278.92502:259 279.17041:19649 279.23056:789 280.17374:3165 281.13458:319 281.1731:600 281.20938:552 281.24747:660 282.21594:237 282.25089:248 282.28165:496 282.99152:217 283.11292:287 283.18915:451 283.2254:396 283.26666:503 283.29898:411 283.85403:207	69.06949:697 81.06993:276 86.09633:7987 87.09936:860 120.07996:323	991.197
MLS001148136-01	3.39207	437.236	16323.1	42443.9	1474.34	[M+Na]+	Postive	POPFMWWJOGLOIF-UHFFFAOYNA-N	Lipids and lipid-like molecules	Steroids and steroid derivatives	Hydroxysteroids	TURE	436.95465:28692 437.18436:254 437.23642:16574 437.31653:389 437.39679:412 437.95721:2649 438.241:2871 438.40192:210 438.95081:4294 439.24316:665 439.34338:346 439.3804:274 439.95071:804 440.94467:659 441.36234:424	69.06968:225 72.99869:285 88.02157:17448 89.02332:1095 90.01669:1113 119.99256:507 131.08505:228 437.23517:1988	919.259
5-Methoxypsoralen	0.295733	215.032	9575.08	42310	1469.69	[M-H]-	Negative	BGEBZHIAGXMEMV-UHFFFAOYSA-N	Phenylpropanoids and polyketides	Coumarins and derivatives	Furanocoumarins	TURE	214.83508:463 214.86983:920 214.93121:939 214.99352:246 215.03244:24157 215.11339:339 215.93701:316 216.03552:2184 216.48769:235 216.86183:546 216.90591:518 216.94398:227 216.97534:273 217.04608:18835 217.10213:421 218.03172:995 218.05038:1806 218.87718:1101 219.04547:4225 220.01118:249	59.01281:828 71.0132:642 83.01277:302 89.02406:712 101.02333:229 126.05544:200 127.95522:457 171.94978:245	640.766
Dexamethasone	3.15743	393.209	16626.3	40088.3	1392.51	[M+Na]+	Postive	UREBDLICKHMUKA-CXSFZGCWSA-N	Lipids and lipid-like molecules	Steroids and steroid derivatives	Hydroxysteroids	FALSE	393.20868:18086 393.33322:229 394.2131:3476 395.18167:240 395.21365:781 395.27878:280 395.31561:402 395.3468:440 395.38187:397 395.42017:284 396.35599:297 397.29166:382 397.32944:311 397.39697:263		945.005
(-)-Eburnamonine; PlaSMA ID-1511	5.43245	295.178	10645.8	38716.3	1344.86	[M+H]+	Postive	WYJAPUKIYAZSEM-UHFFFAOYNA-N	Alkaloids and derivatives	Eburnan-type alkaloids		FALSE	295.13159:242 295.17795:11211 295.25919:498 296.18259:1300 296.22623:237 297.17651:1218 297.20285:603 297.2373:573 298.24139:258 299.10837:1203 299.18854:919 299.21619:398 299.25607:208 300.11368:418		902.142
15-Hydroxyspirosolan-3-yl 2-O-(6-deoxy-alpha-L-mannopyranosyl)-beta-D-glucopyranoside	4.2623	740.463	15269.8	38716.1	1344.85	[M+NH4]+	Postive	RNUHPRWYDXEBOM-UHFFFAOYNA-N	Lipids and lipid-like molecules	Steroids and steroid derivatives	Steroidal glycosides	TURE	740.46277:20056 741.46613:6720 742.46729:1503 743.47113:242 745.41919:2722	73.06491:247 87.04442:700 89.06039:3392 133.08678:1911 175.09856:359	836.851
Isoleucylisoleucine; PlaSMA ID-377	2.45272	243.171	9102.9	38501.6	1337.4	[M-H]-	Negative	BCVIOZZGJNOEQS-UHFFFAOYNA-N	Organic acids and derivatives	Carboxylic acids and derivatives	Amino acids, peptides, and analogues	FALSE	243.17125:9188 244.17598:1100 245.17662:265 245.9847:244 247.93617:271		991.24
S-Adenosyl-L-homocysteine	0.367433	383.114	8018.34	38422.9	1334.66	[M-H]-	Negative	ZJUKTBDSGOFHSH-WFMPWKQPSA-N	Nucleosides, nucleotides, and analogues	5'-deoxyribonucleosides	5'-deoxy-5'-thionucleosides	TURE	382.95917:232 383.02951:221 383.11395:24380 383.18936:466 384.11768:4936 385.01245:212 385.11551:1012 386.11145:743 386.20779:273 386.23636:212 387.11597:494 387.14938:226 387.22037:509	134.04675:4938	807.359
2-Hydroxyglutaric acid	9.07268	149.023	11680.8	38137.1	1324.74	[M+H]+	Postive	HWXBTNAVRSUOJR-UHFFFAOYSA-N	Organic acids and derivatives	Hydroxy acids and derivatives	Short-chain hydroxy acids and derivatives	FALSE	149.02306:13056 149.95303:403 150.02638:780 151.03502:281 151.07315:435 151.1114:685 151.94896:359 152.00591:400 152.94637:736 153.05418:482 153.0898:489		993.413
CINNAMYL ALCOHOL	7.61652	135.081	10452.8	37325.4	1296.54	[M+H]+	Postive	OOCCDEMITAIZTP-QPJJXVBHSA-N	Phenylpropanoids and polyketides	Cinnamyl alcohols		FALSE	135.08087:11049 135.11504:537 136.08452:1173 137.06279:232 137.09752:522 137.96498:562 139.03963:598 139.07367:1205 139.96336:604		980.282
Retinoic acid	9.28925	299.202	6702.51	36806.6	1278.52	[M-H]-	Negative	SHGAZHPCJJPHSC-YCNIQYBTSA-N	Lipids and lipid-like molecules	Prenol lipids	Retinoids	FALSE	299.14874:287 299.20221:6808 299.26193:267 300.20276:1591 302.15207:521 303.82242:227		984.693
Tryptophan	1.5193	205.096	9073.1	36524.4	1268.72	[M+H]+	Postive	QIVBCDIJIAJPQS-VIFPVBQESA-N	Organoheterocyclic compounds	Indoles and derivatives	Indolyl carboxylic acids and derivatives	FALSE	204.92024:210 204.95007:465 204.9659:230 204.99414:221 205.06462:1108 205.09651:9273 206.06752:312 206.10065:975 206.91605:1114 206.94536:207 207.06168:548 207.10172:430 207.17337:280 207.98581:1555 208.98955:212 209.00217:210 209.11809:615 209.15448:564 209.18779:240		977.372
4-Aminophenol	2.1591	108.045	9410.65	36433.1	1265.55	[M-H]-	Negative	PLIKAWJENQZMHA-UHFFFAOYSA-N	Benzenoids	Benzene and substituted derivatives	Aniline and substituted anilines	FALSE	108.01366:235 108.04544:8707 109.0071:206 109.04915:1021 111.00389:457 112.98559:44725		982.541
4-Hexylresorcinol	0.963417	195.123	9928.62	35214.5	1223.21	[M+H]+	Postive	WFJIVOKAWHGMBH-UHFFFAOYSA-N	Benzenoids	Phenols	Benzenediols	FALSE	194.96492:850 195.0994:598 195.12267:10165 195.17334:419 195.99858:229 196.12599:1196 196.1492:379 196.43347:209 196.96336:215 197.00574:6947 197.08142:413 197.11981:1366 197.14972:882 198.00533:918 199.00098:588 199.02852:260 199.09645:385 199.16978:893 199.20271:282 200.00011:2853		902.061
3,4-dimethyl-2,5-bis(3,4,5-trimethoxyphenyl)oxolane	8.06702	415.211	9573	34746.1	1206.94	[M+H]+	Postive	ZPINJJOPURFFNV-UHFFFAOYNA-N	Lignans, neolignans and related compounds	Furanoid lignans	Tetrahydrofuran lignans	FALSE	415.21118:9002 416.21454:3315 416.3718:214 417.2189:517 417.29654:293 419.35324:227		960.069
Ribose-5-phosphate	0.32955	229.013	4836.03	34555.4	1200.32	[M-H]-	Negative	KTVPXOYAKDPRHY-UHFFFAOYNA-N	Organic oxygen compounds	Organooxygen compounds	Carbohydrates and carbohydrate conjugates	FALSE	228.92969:333 229.01334:8162 229.0731:227 229.91795:212 230.01239:299 230.11469:277 230.84088:276 230.91798:275 231.01015:552 231.04066:215 231.9135:576 232.9115:399		931.024
Histamine-trifluoromethyltoluide	9.09198	383.205	17279.5	34387.2	1194.48	[M+Na]+	Postive	PMKJGGBYYNEYPA-UHFFFAOYNA-N	Benzenoids	Benzene and substituted derivatives	Trifluoromethylbenzenes	TURE	383.12582:503 383.2052:20151 383.28046:361 383.35223:298 384.20819:4009 384.3692:242 385.20834:338 385.24631:267 385.31186:227 386.26004:396 386.36151:235	60.08013:286 281.13318:369 327.13876:556 383.20459:3448	987.839
(2Z)-2-[(E)-6-(hydroxymethyl)-2,4,8,10-tetramethyldodec-2-enylidene]-4-methylpentanedioic acid	9.65722	397.292	14888.3	33967.1	1179.88	[M+H]+	Postive	NNPPLRJHBQPBAQ-UHFFFAOYNA-N	Lipids and lipid-like molecules	Prenol lipids	Diterpenoids	TURE	397.29196:23921 397.36911:623 397.3959:388 398.29477:5666 399.29892:830 399.3938:314 401.26144:257	96.09057:230 397.29172:6221	835.903
Phytosphingosine (not validated, isomer of 1696); PlaSMA ID-1697	6.59758	318.3	15037.4	33862.6	1176.26	[M+H]+	Postive	AERBNCYCJBRYDG-UHFFFAOYNA-N	Organic nitrogen compounds	Organonitrogen compounds	Amines	FALSE	318.29956:18578 318.88828:221 319.2338:953 319.30228:3465 320.23959:320 320.30527:559 321.09119:1106 321.14618:437 321.20282:412 322.09692:257 322.88422:206 323.1908:243 323.21744:238 323.25348:259 323.29492:275		994.843
TG 48:11	11.4264	807.562	9034.81	33483.2	1163.08	[M+H]+	Postive	CNOPMVRMDTXASG-QOCHGBHMSA-N	Lipids and lipid-like molecules	Glycerolipids	Triradylcglycerols	FALSE	807.56244:9102 808.56439:3676 809.56506:966 810.55481:392 811.53387:238		819.041
7b,9-Dihydroxy-3-(hydroxymethyl)-1,1,6,8-tetramethyl-5-oxo-1,1a,1b,4,4a,5,7a,7b,8,9-decahydro-9aH-cyclopropa[3,4]benzo[1,2-e]azulen-9a-yl acetate	7.26278	432.238	12052.4	32706.1	1136.08	[M+NH4]+	Postive	WZYGIALDVOKLLL-UHFFFAOYNA-N	Lipids and lipid-like molecules	Prenol lipids	Diterpenoids	FALSE	432.23846:13292 432.3222:257 433.24084:3133 433.33301:251 434.24899:478 435.16745:14058 435.24924:343 436.17068:3240 436.39038:204 436.95279:1044 437.19354:66916		988.027
N-2-Fluorenylacetamide	4.65162	222.085	6735.4	32524.9	1129.79	[M-H]-	Negative	CZIHNRWJTSTCEX-UHFFFAOYSA-N	Benzenoids	Fluorenes		FALSE	221.80194:300 221.84137:1487 221.90599:214 222.08536:7322 222.84883:294 223.0289:299 223.08476:1233 223.79881:247 223.83797:1158 224.02893:271 224.08757:258 224.82628:202 225.79501:249		846.017
4-hydroxybenzaldehyde	2.46593	121.029	6752.68	31974.4	1110.67	[M-H]-	Negative	RGHHSNMVTDWUBI-UHFFFAOYSA-N	Organic oxygen compounds	Organooxygen compounds	Carbonyl compounds	FALSE	120.9605:306 121.02898:7241 122.03293:644 122.05287:296 123.90167:9767 125.89951:8118		971.668
6-[(2E)-3,7-dimethylocta-2,6-dienyl]-7-hydroxychromen-2-one	0.333317	337.121	9150.08	29770.7	1034.12	[M+H]+	Postive	INBMTJJPUABOQJ-UHFFFAOYSA-N	Lipids and lipid-like molecules	Prenol lipids	Terpene lactones	FALSE	337.08429:232 337.12128:19410 337.18991:639 337.23477:263 337.27472:728 337.87531:218 338.12381:3081 338.2439:260 338.33994:2562 339.13052:279 339.21069:348 339.24704:292 339.28784:536 339.34088:793 339.94846:263 340.29431:218 340.32846:265 341.15887:346 341.3027:433		947.817
DL-Hexanoylcarnitine	0.359583	260.197	6089.25	29339.1	1019.13	[M+H]+	Postive	VVPRQWTYSNDTEA-UHFFFAOYSA-O	Lipids and lipid-like molecules	Fatty Acyls	Fatty acid esters	FALSE	260.09146:223 260.12634:324 260.16098:2256 260.19745:15716 260.45883:245 261.10602:300 261.15067:989 261.19998:2482 261.61041:346 261.65823:241 262.11935:851 262.19781:339 262.67157:500 263.06979:724 263.09943:677 263.13541:704 263.15961:878 263.6507:314 263.67108:207 264.09793:318 264.1376:577 264.17181:497 264.6897:290 265.08493:913 265.13116:522 265.17102:1887		866.46
S-Adenosyl-homocysteine	0.56295	383.114	9976.48	29302.5	1017.86	[M-H]-	Negative	ZJUKTBDSGOFHSH-UHFFFAOYNA-N	Nucleosides, nucleotides, and analogues	5'-deoxyribonucleosides	5'-deoxy-5'-thionucleosides	FALSE	383.043:216 383.1142:10452 384.11761:2033 384.93439:1566 385.11124:773 387.06232:253		969.305
Benzoic acid, 4-hydroxy-, 1-(acetyloxy)-1,2,3,3a,4,7,8,8a-octahydro-3-hydroxy-6,8a-dimethyl-3-(1-methylethyl)-7-oxo-4-azulenyl ester	9.61387	429.195	9965	28967.8	1006.23	[M-H]-	Negative	SSFXFPCIUUFGJD-UHFFFAOYNA-N	Lipids and lipid-like molecules	Prenol lipids	Sesquiterpenoids	TURE	429.1951:30077 430.1969:8885 431.19797:2232 432.20123:303 432.5921:208	61.98645:346 83.93108:207 100.93343:10468 101.93388:1683 102.93286:420 116.92854:710 126.95168:248 154.9451:323 172.95483:1612 381.17514:364 429.1936:364	927.959
Troxipide	2.42052	295.164	10204	27653.2	960.564	[M+H]+	Postive	YSIITVVESCNIPR-UHFFFAOYSA-N	Benzenoids	Phenol ethers	Anisoles	FALSE	295.16412:10631 295.22549:631 295.26059:622 296.16678:1715 297.17047:346 297.20447:515 297.2392:569 297.27441:445 297.87878:250 299.13187:204 299.18582:330 299.22009:404 299.29092:266 300.08389:272		989.031
(5xi,6alpha,7alpha,9xi,16xi)-16-(beta-D-Glucopyranosyloxy)-6,7,17-trihydroxykauran-19-oic acid	9.57642	553.257	12957	27358.2	950.317	[M+Na]+	Postive	QUCGBWQRLWOVBR-UHFFFAOYNA-N	Lipids and lipid-like molecules	Prenol lipids	Terpene glycosides	TURE	553.2572:16256 553.3645:297 554.26038:5516 554.38019:264 555.26831:1996 556.27716:413 556.86316:473 557.09686:271 557.2027:331	216.92087:232 553.2572:11304	852.186
DGTS 30:7	11.4285	670.467	13255.1	27080.6	940.676	[M+NH4]+	Postive	ONMNLMPRTPOFLK-NOJLNKGXSA-N	Lipids and lipid-like molecules	Glycerolipids	Triradylcglycerols	FALSE	670.4668:15161 671.47028:6963 672.47308:1153 673.47552:305 675.42261:17449		972.691
3,5-dihydroxy-4-[3,4,5-trihydroxy-6-[[4-(2-hydroxypropan-2-yl)cyclohexene-1-carbonyl]oxymethyl]oxan-2-yl]oxybenzoic acid	11.6931	497.167	4550.81	26536.2	921.765	[M-H]-	Negative	PEERGVFNQUXNQA-UHFFFAOYNA-N	Lipids and lipid-like molecules	Saccharolipids		FALSE	496.99948:234 497.16669:4667 498.16931:1390 499.06195:233 499.16849:959 500.17792:218 500.85165:280		923.607
Choline [M]+	0.307067	104.107	9430.11	26108.5	906.908	[M+H]+	Postive	OEYIOHPDSNJKLS-UHFFFAOYSA-N	Organic nitrogen compounds	Organonitrogen compounds	Quaternary ammonium salts	FALSE	104.07024:253 104.10696:10031 104.145:228 105.11008:479 106.08662:209 106.99139:634 107.08435:304 107.54527:384 109.02686:382 109.0642:334 109.10058:703		979.216
Antibiotic TAN 1169A	2.91378	304.166	6136.07	25450	884.033	[M+H]+	Postive	PJHHQGQQTSEDMC-UHFFFAOYNA-N	Organoheterocyclic compounds	Indoles and derivatives	Pyrroloindoles	FALSE	304.16565:7353 305.13495:376 305.1701:1772 306.16971:263 307.22757:293 307.26212:318		976.994
C21H36O4; PlaSMA ID-1954	9.63585	353.266	12246.8	25050	870.141	[M+H]+	Postive					FALSE	352.89816:391 353.26611:14006 353.32645:370 354.26917:2106 354.3345:1300 354.8931:241 355.14648:234 355.2832:395 355.34109:431 356.13959:242		873.188
MLS000574943-01	4.07713	335.223	11154.3	24808.5	861.753	[M+NH4]+	Postive	BYASTQVSNAVAKL-UHFFFAOYNA-N	Lipids and lipid-like molecules	Prenol lipids	Terpene lactones	FALSE	335.2226:13065 335.72501:3646 336.2272:984 337.10544:638 337.17264:2033 337.23691:498 337.27505:341 337.34882:212 337.70123:13547 338.17429:266 338.20218:5585 338.27032:375 338.31021:351 338.34085:2043 338.65607:206 338.70309:1412 339.17438:326 339.22229:382 339.25534:406 339.28854:865 339.34381:1043 340.17886:4156		922.469
5-Hydroxytryptophan	5.02345	221.092	10908.7	24746.5	859.596	[M+H]+	Postive	LDCYZAJDBXYCGN-UHFFFAOYSA-N	Organoheterocyclic compounds	Indoles and derivatives	Tryptamines and derivatives	FALSE	221.09196:12118 221.15488:449 221.18895:442 222.11162:2546 222.14691:1226 222.18718:682 222.93327:236 222.96205:1086 223.13007:792 223.16628:358 223.95387:415 223.98738:440 224.12817:2038 224.95743:410 225.00232:1354 225.11345:329 225.14677:805 225.18541:602 225.21953:330 225.94894:268		952.031
6,8-dihydroxy-2,2,4,4-tetramethyl-5-(2-methylpropanoyl)-9-propan-2-yl-9H-xanthene-1,3-dione	8.0406	459.201	7397.56	24619.3	855.18	[M-H]-	Negative	AYAUOXWJIWVPSO-UHFFFAOYNA-N	Organoheterocyclic compounds	Benzopyrans	1-benzopyrans	FALSE	459.20132:7294 460.20435:1892 461.21106:281		986.877
Crotetamide	0.40235	227.176	4675.91	23689.2	822.873	[M+H]+	Postive	LSAMUAYPDHUBQD-RMKNXTFCSA-N	Organic acids and derivatives	Carboxylic acids and derivatives	Amino acids, peptides, and analogues	FALSE	227.00664:268 227.0937:243 227.1308:755 227.17578:6422 228.05191:226 228.13026:344 228.18082:771 229.03398:237 229.10576:629 229.14487:354 229.43091:240 230.89203:406 231.0598:278 231.14914:320 231.96957:255		985.492
3-hydroxy-4-(2,6,7-trihydroxy-6-methylheptan-2-yl)benzoic acid	7.61652	281.138	6658.7	23098.4	802.35	[M+H]+	Postive	CYAWKJKAMCXLET-UHFFFAOYNA-N	Lipids and lipid-like molecules	Prenol lipids	Sesquiterpenoids	FALSE	281.1384:7172 281.20786:299 281.24957:334 282.14114:800 282.28165:458 283.14182:243 283.19275:266 283.22635:408 283.26505:309 283.28464:268 284.1857:280 284.26965:792 284.93723:274 285.20343:374 286.00967:207 286.03369:236		977.712
(2S)-2-[(1S)-1-hydroxypentyl]-4-methoxy-2,3-dihydropyran-6-one	2.78783	215.126	5406.33	22732.7	789.647	[M+H]+	Postive	YFIMUDXPJZVJJO-UHFFFAOYNA-N	Organoheterocyclic compounds	Pyrans	Pyranones and derivatives	FALSE	214.93355:238 215.0206:455 215.1261:5418 216.0462:416 216.12778:872 216.86497:238 217.01698:456 217.1021:503 217.12132:317 218.01654:222 218.10037:282 218.95158:227		924.626
Valine	11.6142	118.086	4889.15	22619.7	785.722	[M+H]+	Postive	KZSNJWFQEVHDMF-UHFFFAOYSA-N	Organic acids and derivatives	Carboxylic acids and derivatives	Amino acids, peptides, and analogues	FALSE	117.95861:334 117.98053:252 118.03905:209 118.08614:5512 118.12314:214 119.08771:254 121.05362:246 121.97675:710 122.09554:217 122.92343:374 122.96445:626 122.97683:323		992.243
FA 9:0+1O; PlaSMA ID-176	4.90405	173.118	4212.59	22400.8	778.117	[M-H]-	Negative	XBUXARJOYUQNTC-UHFFFAOYNA-N	Organic acids and derivatives	Hydroxy acids and derivatives	Medium-chain hydroxy acids and derivatives	FALSE	172.83568:1289 173.07788:229 173.1178:4800 173.83952:255 174.12151:447 174.83675:1138 175.85023:466 176.83403:469 177.84448:4847 177.90123:249		988.417
Pirimicarb	1.49868	239.149	6124.45	22393.5	777.865	[M+H]+	Postive	YFGYUFNIOHWBOB-UHFFFAOYSA-N	Organic nitrogen compounds	Organonitrogen compounds	Amines	FALSE	239.14938:6044 239.19696:791 239.23399:353 240.15245:898 240.23921:338 241.03003:379 241.15082:547 241.17673:603 241.21594:639 241.9613:268 242.17686:330 243.12045:283 243.16078:226 243.19046:225 243.87511:208		975.83
12-epi-hapalindole C isonitrile	7.90268	305.2	7344.35	22152.5	769.491	[M+H]+	Postive	KGWATBYKCMCFLC-UHFFFAOYNA-N	Lipids and lipid-like molecules	Prenol lipids	Monoterpenoids	FALSE	304.9144:2983 305.19946:8009 306.15628:288 306.20059:1338 306.91489:612 307.19681:753 307.22568:299 308.26337:256 309.24152:434 309.27795:694 310.12476:327		904.815
Tridecanoic acid	9.23637	213.186	5484.9	21750.8	755.54	[M-H]-	Negative	SZHOJFHSIKHZHA-UHFFFAOYSA-N	Lipids and lipid-like molecules	Fatty Acyls	Fatty acids and conjugates	FALSE	212.90993:447 213.05412:776 213.1859:6338 213.78085:262 214.18813:991 215.00746:255 216.85327:428 216.87897:932 217.85197:359		990.852
1,8-Azulenediol, 1,2,3,3a,4,7,8,8a-octahydro-3a,6-dimethyl-1-(1-methylethyl)-, (1R,3aR,8S,8aS)-	4.80655	221.19	7305.92	21310.4	740.241	[M+H]+	Postive	SUAPQGLGNKUSLY-UHFFFAOYNA-N	Lipids and lipid-like molecules	Prenol lipids	Sesquiterpenoids	FALSE	221.07713:538 221.1163:481 221.14699:318 221.18991:7749 222.1116:1882 222.15517:497 222.18744:4088 222.95992:1393 223.05835:585 223.09399:357 223.13031:653 223.16769:429 223.20445:314 223.95412:280 223.9886:384 224.12823:2782 225.00076:1618 225.0154:1031 225.11024:897 225.14285:895 225.18878:791 225.95284:210		938.445
DG 34:7	9.2687	600.468	9930.95	21187.2	735.962	[M+NH4]+	Postive	PZZJOFUZXBAHPJ-OFHSENOBNA-N	Lipids and lipid-like molecules	Fatty Acyls	Lineolic acids and derivatives	FALSE	600.46851:10494 600.55579:212 601.29095:206 601.47034:3808 602.47504:938 603.25507:258 603.47864:211 605.42383:2985		819.547
1-methyl-2-tridecylquinolin-4-one	9.3287	364.261	4717.44	21143.7	734.451	[M+H]+	Postive	DWHCRAGHDDLXEM-UHFFFAOYSA-N	Organoheterocyclic compounds	Quinolines and derivatives	Quinolones and derivatives	FALSE	364.26074:6186 364.33691:394 365.26303:1750 365.30023:341 366.25726:739 367.32367:286 368.22601:582 368.86844:326		976.712
1-Naphthylamine	4.29757	144.081	6737.53	20575.4	714.71	[M+H]+	Postive	RUFPHBVGCFYCNW-UHFFFAOYSA-N	Benzenoids	Naphthalenes		FALSE	143.95801:377 144.04286:223 144.0809:6625 144.98235:2184 145.04759:781 145.08479:1327 145.91682:211 146.03969:459 146.98959:446 147.02298:13033 147.06477:365 147.1154:464 148.02538:607 148.94548:1139 148.99196:244 149.01897:1898		967.932
Fusaric acid (not validated); PlaSMA ID-492	2.28913	180.102	4532.89	20338.7	706.487	[M+H]+	Postive	DGMPVYSXXIOGJY-UHFFFAOYSA-N	Organoheterocyclic compounds	Pyridines and derivatives	Pyridinecarboxylic acids and derivatives	FALSE	179.99039:3062 180.06825:354 180.10202:4720 180.14256:302 180.94839:348 180.98872:727 181.04779:221 181.12173:567 181.98758:335 182.96207:919 182.98537:3436 183.10046:743 183.13582:561 183.96161:228 183.9886:518 184.02724:861 184.10605:237 184.98361:962 185.00491:1125 185.07858:267		967.836
Norleucine	0.367433	130.087	3664.4	20275.1	704.277	[M-H]-	Negative	LRQKBLKVPFOOQJ-YFKPBYRVSA-N	Organic acids and derivatives	Carboxylic acids and derivatives	Amino acids, peptides, and analogues	FALSE	129.99437:1082 130.08719:11996 130.12907:260 130.9635:231 131.03464:271 131.04578:263 131.08969:1025 131.99159:1354 132.01183:372 132.02968:405 132.86777:2460 133.0508:3693 133.08458:260 133.99367:407 134.04709:34394 134.08896:693 134.86522:2852 134.8947:7999 135.02661:821 135.05038:3054		992.904
Methyl Dihydrojasmonate	5.74825	225.15	6831.36	20006.6	694.952	[M-H]-	Negative	KVWWIYGFBYDJQC-UHFFFAOYNA-N	Lipids and lipid-like molecules	Fatty Acyls	Lineolic acids and derivatives	FALSE	225.15002:7095 226.15361:733 228.99266:532		977.136
Phenylalanine; PlaSMA ID-359	0.770967	166.086	7332.19	19923	692.05	[M+H]+	Postive	COLNVLDHVKWLRT-UHFFFAOYNA-N	Organic acids and derivatives	Carboxylic acids and derivatives	Amino acids, peptides, and analogues	FALSE	165.98273:435 166.08612:7668 166.96284:787 167.01414:701 167.06906:952 167.08739:892 167.10425:688 167.14151:436 168.05057:204 168.09048:315 168.11954:272 168.92635:225 168.9635:259 169.09344:655 169.123:397 170.04666:202 171.06358:318		977.171
1-Methyladenosine	0.612033	282.119	7136.93	19721.5	685.05	[M+H]+	Postive	GFYLSDSUCHVORB-IOSLPCCCSA-N	Nucleosides, nucleotides, and analogues	Purine nucleosides		FALSE	282.1192:6712 282.25192:232 282.27869:1729 282.89328:213 282.92328:330 282.97006:326 283.12216:1274 283.18988:646 283.22546:955 283.27032:537 284.22906:222 284.89285:693 284.93362:216 284.97342:251 285.20505:306 285.23804:261 285.27728:246 286.24329:206 286.27692:220		977.264
Tebutate	3.56617	459.28	8363.79	18709	649.879	[M+H]+	Postive	HUMXXHTVHHLNRO-UHFFFAOYSA-N	Lipids and lipid-like molecules	Steroids and steroid derivatives	Pregnane steroids	FALSE	459.28036:8442 460.28418:1694 461.29257:352 462.32675:214 463.40689:234 463.45352:253		816.036
DGTS 34:9	9.1703	722.503	6366.7	18309.4	635.997	[M+NH4]+	Postive	JYMFYCROPMWDGA-XWRSRSOESA-N	Lipids and lipid-like molecules	Glycerolipids	Triradylcglycerols	FALSE	722.50275:6622 723.50769:2785 723.61682:298 724.51166:973 727.45929:2306		912.902
PC 35:7	4.35343	784.489	8238.74	18284.5	635.134	[M+NH4]+	Postive	IKPCRQHSLPVCFB-TYZLGWJSNA-N	Lipids and lipid-like molecules	Glycerophospholipids	Glycerophosphocholines	FALSE	784.48944:8812 785.49219:4320 786.49854:656 787.49255:306 787.81091:260 789.44312:1875		975.093
(5R)-3-({(1S,2R,4aS,6R,8aR)-1,6-Dimethyl-2-[(1E)-1-propen-1-yl]-1,2,4a,5,6,7,8,8a-octahydro-1-naphthalenyl}carbonyl)-4-hydroxy-5-(hydroxymethyl)-1-methyl-1,5-dihydro-2H-pyrrol-2-one	3.39207	415.254	7093.5	18174.2	631.3	[M+H]+	Postive	YHKYFYCSTJGMID-UHFFFAOYNA-N	Organoheterocyclic compounds	Pyrrolines		FALSE	415.25394:7910 416.2597:1119 416.34164:213 417.2709:743 419.22696:225		824.658
Phenylalanine (Not validated); PlaSMA ID-143	0.637183	164.071	4068.93	17743	616.325	[M-H]-	Negative	COLNVLDHVKWLRT-UHFFFAOYNA-N	Organic acids and derivatives	Carboxylic acids and derivatives	Amino acids, peptides, and analogues	FALSE	163.83827:421 164.07141:4136 164.29053:211 164.83595:3391 164.89421:227 165.83551:293 166.83379:251 167.83569:292 168.83585:2095 168.97604:208		959.252
{(1S,2R,4aS,5R,8aS)-2-Hydroxy-5-[(3E)-5-hydroxy-3-methyl-3-penten-1-yl]-1,4a-dimethyl-6-methylenedecahydro-1-naphthalenyl}methyl beta-D-threo-hexopyranoside	4.56723	467.301	7172.53	17225.7	598.354	[M+H]2+	Postive	CWDBCXIAEGDANA-UHFFFAOYNA-N	Lipids and lipid-like molecules	Prenol lipids	Terpene glycosides	FALSE	467.17444:215 467.30115:7360 467.36633:453 467.41187:281 467.44415:232 467.80222:3491 468.30066:1865 468.80295:462 469.25189:518 469.77863:4981 470.28305:839 470.42075:251 470.45465:201 470.7825:509 472.25281:332		962.778
1-Oxaspiro[2.5]octan-6-ol, 5-methoxy-4-[(2R,3R)-2-methyl-3-(3-methyl-2-buten-1-yl)oxiranyl]-, (3R,4S,5S,6R)-	6.28183	324.215	7336.97	17159.5	596.057	[M+Na]+	Postive	CEVCTNCUIVEQOY-UHFFFAOYNA-N	Organic oxygen compounds	Organooxygen compounds	Alcohols and polyols	FALSE	324.21524:7824 324.29565:287 325.21878:1217 325.27222:476 325.30756:259 325.9212:233 326.21906:296 326.27771:241 327.25189:394 327.30215:205 328.12216:215 328.25204:232 328.2851:201 329.12036:225		928.854
Isoleucylvaline; PlaSMA ID-915	0.965467	231.17	6123.37	16490.5	572.818	[M+H]+	Postive	BCXBIONYYJCSDF-UHFFFAOYNA-N	Organic acids and derivatives	Carboxylic acids and derivatives	Amino acids, peptides, and analogues	FALSE	231.17023:7121 231.96928:433 232.17471:899 233.06195:1481 233.14893:479 233.19073:237 234.1351:648 234.91327:306 235.00214:388 235.1353:335 235.16425:251 235.20302:237		993.418
Labetalol	4.07918	329.188	7346.01	16427.5	570.626	[M+H]2+	Postive	SGUAFYQXFOLMHL-UHFFFAOYSA-N	Benzenoids	Benzene and substituted derivatives	Benzoic acids and derivatives	FALSE	328.96906:204 329.18753:7490 329.6904:1759 330.18781:408 331.0451:322 331.15604:204 331.24545:225 332.20779:256		888.696
2-Deoxyribose	0.346833	133.051	2333.89	16403.8	569.803	[M-H]-	Negative	ASJSAQIRZKANQN-UHFFFAOYNA-N	Organic oxygen compounds	Organooxygen compounds	Carbonyl compounds	FALSE	132.86713:1346 132.89919:3364 132.93317:582 133.01385:724 133.0289:459 133.0506:2701 133.98903:1167 134.02924:360 134.04639:3818 134.8652:1390 134.89456:38108 135.02888:1172 135.06364:417 135.87262:218 135.89459:5908 135.94508:406 135.97153:634 136.02896:338 136.86223:657 136.8918:13062 136.99352:317 137.02264:1484 137.03409:1210 137.89204:1394 137.94241:375 137.99774:333 138.03789:237		977.666
C12-AE1S (TENTATIVE)	9.88332	309.173	4265.76	16365.4	568.47	[M-H]-	Negative	QTDIEDOANJISNP-UHFFFAOYSA-N	Organic acids and derivatives	Organic sulfuric acids and derivatives	Sulfuric acid esters	FALSE	309.17303:5377 310.17673:818 311.16873:25810 311.25809:234 312.17172:5824 313.1701:1326		970.099
Betamethasone 21	7.59997	433.202	3038.41	15759.2	547.415	[M-H2O-H]-	Negative	AKUJBENLRBOFTD-QZIXMDIESA-N	Lipids and lipid-like molecules	Steroids and steroid derivatives	Pregnane steroids	FALSE	433.20233:3255 434.20639:931 435.00549:257 436.65686:212		971.967
Feruloyl putrescine (isomer of 1178); PlaSMA ID-1173	2.45968	265.154	7799.62	15706.5	545.582	[M+H]+	Postive	SFUVCMKSYKHYLD-UHFFFAOYSA-N	Phenylpropanoids and polyketides	Cinnamic acids and derivatives	Hydroxycinnamic acids and derivatives	FALSE	264.95557:341 265.15396:8641 265.21399:310 265.90771:470 266.15878:1193 266.95062:485 267.15747:721 267.19308:613 267.22964:915 267.26666:512 267.90372:222 268.15659:226 268.94662:250 269.13928:325 269.17197:306 269.21075:556 269.24332:590		975.22
Drofenine	8.58172	318.24	7503.76	15523.9	539.242	[M+H]+	Postive	AGJBLWCLQCKRJP-UHFFFAOYNA-N	Benzenoids	Benzene and substituted derivatives		FALSE	318.23996:8852 318.27652:2466 318.92554:239 319.18625:282 319.2417:1501 319.28348:603 320.24554:494 321.24014:429 321.27725:252 322.11945:233 322.23981:255 322.2811:250 323.22623:297		826.12
Stigmast-7-ene-6,26-dione, 26,28-epoxy-2,3,14,20,22-pentahydroxy-, (2beta,3beta,5beta,9xi,22R,24S,25S,28R)-	3.71143	503.304	5273.6	15342.4	532.936	[M+H]+	Postive	NEFYSBQJYCICOG-UHFFFAOYNA-N	Lipids and lipid-like molecules	Prenol lipids	Triterpenoids	FALSE	502.93216:254 503.30423:9184 504.30814:2142 505.31134:355 507.32181:215 507.43198:208		882.843
PC 33:2	9.15795	766.533	5798.01	15212	528.406	[M+NH4]+	Postive	WCOJSHIXJSUSNA-SPIJFJCBNA-N				FALSE	766.53278:5802 767.53479:3197 768.53516:557 771.48694:2242		893.864
2-Hydroxyisocaproic acid	1.4562	131.071	2326.44	15144.5	526.063	[M-H]-	Negative	LVRFTAZAXQPQHI-UHFFFAOYSA-N	Lipids and lipid-like molecules	Fatty Acyls	Fatty acids and conjugates	FALSE	130.95438:209 131.07086:2701 131.91669:511 132.86906:287 132.90007:932 132.93777:237 132.99138:359 133.01282:208 133.90842:280 134.04701:478 134.86501:910 134.89433:18544 134.93759:356 135.90092:3106 135.93663:259 135.96863:326		974.665
4-Isopropylbenzoic acid	5.45058	163.076	1862.03	15029.7	522.072	[M-H]-	Negative	CKMXAIVXVKGGFM-UHFFFAOYSA-N	Lipids and lipid-like molecules	Prenol lipids	Monoterpenoids	FALSE	162.83897:13764 162.88483:237 162.93069:4756 162.97955:283 163.07626:2962 163.10913:212 163.93291:632 164.02165:266 164.83607:4392 164.92734:411 165.83441:460 165.97827:10459 166.83267:1053 166.98335:1005 167.83727:1378 167.97426:801		957.038
N-Acetylglutamic acid	0.367433	188.056	2197.95	15001.6	521.098	[M-H]-	Negative	RFMMMVDNIPUKGG-UHFFFAOYNA-N	Organic acids and derivatives	Carboxylic acids and derivatives	Amino acids, peptides, and analogues	FALSE	188.05632:3765 188.10919:290 189.07306:805 189.94783:239 190.10756:572 191.05522:729 191.09302:252 192.00784:361 192.98482:328		966.525
Disaccharide(Hex-Hex); PlaSMA ID-1741	0.342317	325.112	3297.85	14663.5	509.353	[M+H]+	Postive	PVXPPJIGRGXGCY-UHFFFAOYNA-N	Organic oxygen compounds	Organooxygen compounds	Carbohydrates and carbohydrate conjugates	FALSE	325.11243:5398 325.21021:1551 325.27478:465 325.3103:420 325.71216:762 325.91873:218 326.11307:740 326.21149:317 326.27667:270 326.31277:378 326.67722:254 327.21436:456 327.24716:232 327.28659:301 329.19373:231 329.2684:279		972.915
N-Methylglutamic acid	0.252483	162.076	5643.56	14611.3	507.541	[M+H]+	Postive	XLBVNMSMFQMKEY-UHFFFAOYSA-N	Organic acids and derivatives	Carboxylic acids and derivatives	Amino acids, peptides, and analogues	FALSE	162.05075:1072 162.07581:6677 162.96831:237 163.01863:1937 163.05429:595 163.08124:461 163.14668:232 164.9861:331 165.05365:363 165.06857:1021 165.0887:319 165.12755:236 165.98503:331 166.10257:262 166.96454:549 167.01187:798 167.02885:487 167.06917:433		969.274
PC 33:1	9.44535	746.565	4213.96	14294.7	496.543	[M+NH4]+	Postive	OMFTUHYBEUVCGQ-SWRYNVBMNA-N				FALSE	746.5647:5891 747.5672:2178 748.56921:575 751.51868:1724		826.19
N-Methyl-2-pyrrolidone	0.762733	100.076	6099.02	14181.5	492.61	[M+H]+	Postive	SECXISVLQFMRJM-UHFFFAOYSA-N	Organoheterocyclic compounds	Pyrrolidines	N-alkylpyrrolidines	FALSE	99.92454:237 99.96847:516 100.07554:6171 100.11147:1047 100.93172:552 100.95834:426 101.01778:2360 101.0612:453 101.08069:227 101.9639:329 102.01307:12442 102.05202:222 102.12608:353 103.01699:311 103.03309:878 103.07409:269 103.9556:791 104.00943:1154 104.06765:217 105.01268:213		989.382
(19R)-9-acetyl-19-hydroxy-10,14-dimethyl-20-oxopentacyclo[11.8.0.0<2,10>.0<4,9 >.0<14,19>]henicos-17-yl acetate	7.9619	467.277	5294.59	14150.5	491.533	[M+H]+	Postive	DMAXEADUOQCSHM-UHFFFAOYSA-N	Lipids and lipid-like molecules	Steroids and steroid derivatives	Steroid esters	FALSE	467.27744:5190 468.28104:1594 468.43683:302 469.28369:381 469.37665:268 471.28934:209		985.909
Erythronolactone	0.94475	117.019	2398.98	14055	488.217	[M-H]-	Negative	SGMJBNSHAZVGMC-UHFFFAOYNA-N	Organoheterocyclic compounds	Lactones	Gamma butyrolactones	FALSE	116.9298:14686 117.01935:3379 117.04044:447 117.93006:1117 118.03028:430 118.90091:371 118.94096:1216 118.96336:293 118.99296:349 119.03645:3012 119.92278:269 120.99255:238 121.03001:820		981.689
[(2R,3S,4S,5R,6S)-6-[3,5-dihydroxy-4-[3-(4-hydroxyphenyl)propanoyl]phenoxy]-3,4,5-trihydroxyoxan-2-yl]methyl 3,4,5-trihydroxybenzoate	11.6898	587.138	1888.02	13898.4	482.777	[M-H]-	Negative	YPFUHFNAEWURDN-UHFFFAOYNA-N	Phenylpropanoids and polyketides	Flavonoids	Flavonoid glycosides	FALSE	587.13794:1540 587.36963:218 588.89612:2468 589.14789:262 589.89929:325 590.12982:273 590.42725:201 591.47974:263		823.652
PC 36:6	9.3632	778.543	5955.56	13870.4	481.804	[M+H]+	Postive	HAIPHKFLSXSDAN-YHQCCJRBNA-N	Lipids and lipid-like molecules	Glycerophospholipids	Glycerophosphocholines	FALSE	778.5426:8090 779.5448:4823 780.54388:1351 781.54755:306		875.563
Propionylcarnitine	3.17805	218.14	5488.86	13759.2	477.943	[M+H]+	Postive	UFAHZIUFPNSHSL-UHFFFAOYSA-N	Lipids and lipid-like molecules	Fatty Acyls	Fatty acid esters	FALSE	217.98195:461 218.14005:6216 218.44977:304 219.09914:264 219.14256:559 219.16951:220 220.14474:289 220.16338:232 221.04597:220 221.1205:386 222.11278:4755 222.96146:1174 223.09444:349 223.11275:490 223.13283:641		971.478
2,5-Dihydroxybenzaldehyde	0.411167	137.022	1953.74	13717.8	476.502	[M-H]-	Negative	CLFRCXCBWIQVRN-UHFFFAOYSA-N	Organic oxygen compounds	Organooxygen compounds	Carbonyl compounds	FALSE	136.86331:371 136.89171:5379 136.99075:876 137.02228:2075 137.03386:1444 137.89656:1031 137.96683:368 137.98686:203 138.89001:290 138.94194:377 139.01274:422 140.98459:525 141.01915:565 141.05435:361 141.92108:372		889.409
Undecanoic acid	8.63773	185.155	2988.88	13531.4	470.029	[M-H]-	Negative	ZDPHROOEEOARMN-UHFFFAOYSA-N	Lipids and lipid-like molecules	Fatty Acyls	Fatty acids and conjugates	FALSE	184.87259:265 185.15451:4186 185.83047:401 185.87286:227 186.15804:241 186.87183:213 187.13083:232 187.87091:376 187.99506:243 188.86713:234 189.86163:462		974.533
FA 13:3+1O; PlaSMA ID-329	5.11352	223.134	2258.41	13482.6	468.334	[M-H]-	Negative	XHDHWGKEDVWKAN-UHFFFAOYSA-N	Lipids and lipid-like molecules	Fatty Acyls	Fatty acids and conjugates	FALSE	222.82837:438 223.13402:3004 223.79805:211 223.84079:585 224.82611:417 226.81818:201		961.31
(2R,2'R,4a'S,6'S,7'R,8a'S)-4,6',7'-Trihydroxy-2',5',5',8a'-tetramethyl-3',4',4a',5',6',7,7',8,8',8a'-decahydro-2'H-spiro[furo[2,3-e]isoindole-2,1'-naphthalen]-6(3H)-one	3.21308	402.233	5819.8	13342.6	463.472	[M+NH4]+	Postive	RUBLIKRGQGISNL-UHFFFAOYNA-N	Organoheterocyclic compounds	Isoindoles and derivatives	Isoindolines	FALSE	402.23248:7004 403.23923:1245 404.20938:211 407.18585:1351		840.308
N-Oleoylethanolamine111-58-0	9.35213	326.306	2758.16	13306.9	462.229	[M+H]+	Postive	BOWVQLFMWHZBEF-UHFFFAOYSA-N	Organic nitrogen compounds	Organonitrogen compounds	Amines	FALSE	326.30566:4447 327.30817:928 328.27493:337 329.1601:5661 330.16336:1272 330.34213:231 331.16183:272 331.21283:480		982.24
Diphenylsulfone	0.385083	219.044	2478.11	13304.9	462.161	[M+NH4]+	Postive	KZTYYGOKRVBIMI-UHFFFAOYSA-N	Benzenoids	Benzene and substituted derivatives	Benzenesulfonyl compounds	FALSE	219.04449:5373 219.10956:475 219.13342:2325 220.00519:222 220.04758:771 220.13474:543 220.64888:225 221.06055:861 221.08984:818 221.1217:647 221.14722:450 221.64848:265 221.99603:246 222.07181:418 222.11293:1550 222.1508:408 222.19304:326 222.64516:638 222.96249:478 223.03365:499 223.05066:305 223.10434:458 223.14072:1038 223.16734:683 223.64725:771 223.98694:434		823.156
DGTS 31:7	11.4285	684.483	3932.17	13232.8	459.657	[M+H]+	Postive	ZRAVSEXPMFYOEQ-VWYFYRHPSA-N	Lipids and lipid-like molecules	Glycerolipids	Triradylcglycerols	FALSE	684.4834:4949 684.55713:275 684.81909:208 685.43292:556 685.48517:1200 686.48511:434		910.054
Phytosphingosine	6.39565	318.301	4571.14	13097	454.939	[M+H]+	Postive	AERBNCYCJBRYDG-KSZLIROESA-N	Organic nitrogen compounds	Organonitrogen compounds	Amines	FALSE	318.05215:219 318.30075:5501 319.18674:315 319.30435:1259 320.30411:212 321.14621:664 321.20453:232 322.15161:251 323.18231:235 323.21042:1694 323.25082:269 323.29099:510		982.344
1-Methyl-2-[(6Z)-6-undecen-1-yl]-4(1H)-quinolinone	8.57142	334.215	4387.74	13019.9	452.261	[M+H]+	Postive	ILAQTUNYLVMXNW-UHFFFAOYSA-N	Organoheterocyclic compounds	Quinolines and derivatives	Quinolones and derivatives	FALSE	334.21475:4894 335.21921:1677 335.293:268 337.19604:380 337.2699:683 338.16272:329 338.27161:219 338.34174:1681 339.21375:202		946.006
alpha-D-Glucopyranoside, beta-L-fructofuranosyl, 6-(4-hydroxy-3-methoxybenzoate)	7.61652	515.135	4275.29	12950.5	449.85	[M+H]+	Postive	CFTZBGSPPBNRNF-UHFFFAOYNA-N	Phenylpropanoids and polyketides	Tannins	Hydrolyzable tannins	FALSE	515.13501:5069 515.31512:1269 516.14014:1109 516.31781:652 517.13806:515 517.25305:472 518.30841:204 519.133:200 519.32019:488		955.709
Pindolol	9.81637	249.158	4611.59	12818.8	445.275	[M+Na]+	Postive	JZQKKSLKJUAGIC-UHFFFAOYNA-N	Organoheterocyclic compounds	Indoles and derivatives	Indoles	FALSE	249.04889:286 249.15764:5011 249.217:400 250.17583:945 251.12512:659 251.18224:253 251.23734:267 252.15884:263 253.13759:253		852.772
N-Methylanthranilic acid	2.15343	152.07	5598.34	12719.1	441.812	[M+H]+	Postive	WVMBPWMAQDVZCM-UHFFFAOYSA-N	Benzenoids	Benzene and substituted derivatives	Benzoic acids and derivatives	FALSE	151.94916:823 152.07002:6840 152.11896:273 152.94826:244 153.0526:413 153.07141:411 153.09363:380 153.12598:492 153.95284:436 153.99187:275 154.49953:221 154.9657:682 155.07109:262 155.1049:442 155.15273:485 155.97031:264 155.98807:526 156.10789:346 156.97356:426 157.00816:224		974.593
Tetrasaccharides (Hex-Hex-Hex-Hex); PlaSMA ID-1820	0.343533	665.215	2363.45	12414.8	431.241	[M-H]-	Negative	UQZIYBXSHAGNOE-UHFFFAOYNA-N	Organic oxygen compounds	Organooxygen compounds	Carbohydrates and carbohydrate conjugates	FALSE	665.21509:3030 666.21588:1086		944.02
Euphorbia factor L14 - Lathyrane diterpenoid	9.6006	659.29	4671.35	12278.9	426.523	[M+Na]+	Postive	JBQJQRQPOXLFNB-UHFFFAOYNA-N				FALSE	659.2901:6232 660.29358:2735 661.29132:871 661.34778:201		857.327
Hydrocotarnine	0.24835	222.112	5513.21	12201.5	423.832	[M+H]+	Postive	XXANNZJIZQTCBP-UHFFFAOYSA-N	Organoheterocyclic compounds	Tetrahydroisoquinolines		FALSE	222.112:5382 222.96143:1312 223.12883:503 223.16859:684 223.98672:1108 224.12817:3758 224.95734:299 225.00058:2341 225.07332:205 225.1116:548 225.13069:712 225.14792:598 225.18579:888 225.2205:341 226.15511:218 226.8802:239 226.94649:353 227.00159:409		966.578
NCGC00380821-01	8.46348	366.191	4871.16	12195.3	423.618	[M+H]+	Postive	ZGHAVKULRAPSKM-UHFFFAOYNA-N	Lipids and lipid-like molecules	Prenol lipids	Diterpenoids	FALSE	366.19131:5964 366.86487:273 367.1937:1314 367.31345:539 367.35535:365 368.31357:449 369.04144:443 369.13339:280 369.33612:234 371.0387:350 371.11322:480		983.353
Glimepiride	6.99107	491.23	4749.96	12185.3	423.271	[M+H]+	Postive	WIGIZIANZCJQQY-UHFFFAOYSA-N	Benzenoids	Benzene and substituted derivatives	Benzenesulfonamides	FALSE	491.03259:715 491.2298:4459 492.23248:1482 493.22806:3022 493.42059:367 493.44983:237 493.49969:390 494.2334:720 495.21875:229 495.44598:282		903.514
L-Citrulline	4.16857	351.2	4438.01	12018.6	417.481	[M+H]2+	Postive	RHGKLRLOHDJJDR-BYPYZUCNSA-N	Organic acids and derivatives	Carboxylic acids and derivatives	Amino acids, peptides, and analogues	FALSE	351.20029:6919 351.28555:390 351.32474:272 351.70206:1927 352.19229:457 352.69931:441 353.18402:507 353.26508:387 353.30661:621 353.33716:451 354.23831:239 354.26807:263 354.30569:218 355.18289:256 355.25385:286 355.28336:249 355.31702:206 356.13449:271		969.13
Glaucolide B	5.71885	439.162	3508.26	11929.4	414.382	[M+H]+	Postive	JNLNEIIZZQABDP-UHFFFAOYNA-N	Lipids and lipid-like molecules	Prenol lipids	Terpene lactones	FALSE	439.16208:4003 439.3757:289 439.41354:245 439.44962:274 440.16196:903 440.31039:325 441.15799:330 441.35065:215 442.28137:224 442.33759:7966 442.41574:392 443.34079:2818		954.75
lysoDGTS 10:2	6.7732	386.252	4386.86	11863.7	412.098	[M+NH4]+	Postive	FLUROJPHQUUZCK-AVQMFFATNA-N	Organic acids and derivatives	Carboxylic acids and derivatives	Amino acids, peptides, and analogues	FALSE	386.2525:5380 386.32513:315 386.35794:356 387.25647:1234 387.33047:280 388.18134:239 388.26187:244 388.29184:269 389.27832:235 391.20996:17432		932.408
DGTS 34:7	11.4264	726.528	5297.9	11846.7	411.509	[M+H]+	Postive	PQZQVUFECRJYAS-QQYAPMDWSA-N	Lipids and lipid-like molecules	Glycerolipids	Triradylcglycerols	FALSE	726.52771:5546 727.53076:2223 728.53113:520 729.53766:226		901.865
(7R,8R)-7,8-Dihydroxy-3,5,7-trimethyl-7,8-dihydro-6H-isochromen-6-one	9.07887	205.086	4368.55	11271.3	391.522	[M+H]+	Postive	JVUYBLROBHJEJN-UHFFFAOYNA-N	Organoheterocyclic compounds	Azaphilones		FALSE	205.08585:4128 206.08963:869 207.06046:580 207.09508:640 209.07741:406 209.11505:310 209.14784:219 209.19547:324 209.94637:665		927.338
Phenylalanine, N-benzoyl-, methyl ester	5.80303	306.111	4208.91	11179	388.315	[M+H]+	Postive	BRQQPHKRRCUYLA-UHFFFAOYNA-N	Organic acids and derivatives	Carboxylic acids and derivatives	Amino acids, peptides, and analogues	FALSE	305.91583:2444 306.11118:4569 306.90936:4012 307.11481:762 307.91153:313 307.94339:225 308.10727:299 308.23746:306 308.25842:244 308.90567:526 309.20465:508 309.24222:210 309.27704:490 310.19443:513		958.875
Melamine	0.311183	127.073	3537.28	11083.3	384.992	[M+H]+	Postive	JDSHMPZPIAZGSV-UHFFFAOYSA-N	Organoheterocyclic compounds	Triazines	1,3,5-triazines	FALSE	126.96103:374 127.0244:443 127.03983:1081 127.07287:3586 127.08418:2446 128.05583:324 128.07727:254 128.10667:367 128.95036:544 129.01395:296 129.10072:616 129.93425:256 129.9738:249 130.00809:1780 130.0603:620 130.0847:558 130.15756:470 130.60312:811 130.93451:514 130.9801:230 131.00124:281 131.02992:237 131.08369:235 131.1183:1997 131.93031:5118 132.00301:385		940.163
2-(6-hydroxy-6-methylheptyl)-2H-furan-5-one	5.1968	230.175	5108.56	10988.6	381.702	[M+H]+	Postive	RFEPDQFPTNCOBK-UHFFFAOYNA-N	Organoheterocyclic compounds	Dihydrofurans	Furanones	FALSE	230.1442:370 230.175:5406 230.22003:451 231.10172:237 231.17885:418 232.18983:273 233.06093:857 233.10886:212 233.17102:252 234.14732:395 234.16986:244 235.13428:255		976.13
(2,6,6-Trimethyl-4-oxo-2-cyclohexen-1-yl)methyl beta-D-glucopyranoside	0.250417	353.156	4349.15	10923.2	379.43	[M+H]2+	Postive	FOONTNRMWNJWCL-UHFFFAOYNA-N	Organic oxygen compounds	Organooxygen compounds	Carbohydrates and carbohydrate conjugates	FALSE	353.15561:5043 353.23074:218 353.30527:721 353.34125:288 353.65683:1219 353.89072:246 354.15677:780 355.24478:440 355.28189:395 355.32245:294 356.24673:211 356.28571:425 356.93948:227 357.15567:3726 357.25735:208 357.48871:988 357.81906:305		937.828
FA 18:1+1O; PlaSMA ID-585	9.33703	297.243	1828.63	10920.5	379.335	[M-H]-	Negative	IMYZYCNQZDBZBQ-UHFFFAOYNA-N	Lipids and lipid-like molecules	Fatty Acyls	Lineolic acids and derivatives	FALSE	296.98083:675 297.04553:220 297.06628:285 297.15341:2148 297.24335:1819 298.1561:430 298.24692:457 299.15283:290 299.20129:5044 300.20377:1096 300.88678:468 301.21545:761 302.22528:222		979.112
Oxamniquine	6.48272	280.166	4365.14	10789.4	374.781	[M+H]+	Postive	XCGYUJZMCCFSRP-UHFFFAOYSA-N	Organoheterocyclic compounds	Quinolines and derivatives	Nitroquinolines and derivatives	FALSE	280.09927:385 280.16644:5060 280.26556:212 281.1694:930 281.20752:643 281.245:456 281.39728:257 282.16891:536 282.21707:276 282.27917:1081 282.92722:225 283.11801:305 283.25702:772 284.2392:508 284.26883:6716 284.89331:412		970.991
(E)-1-(4-hydroxy-3-methoxyphenyl)dec-4-en-3-one	6.94908	277.179	3648.53	10641.7	369.651	[M+H]+	Postive	OQWKEEOHDMUXEO-UHFFFAOYSA-N	Benzenoids	Phenols	Methoxyphenols	FALSE	276.89459:208 277.07663:203 277.14066:215 277.17914:4287 278.18198:700 279.09729:493 279.15857:490 279.19363:288 280.18915:259 281.1723:258 281.21082:827 281.24698:570		955.463
C17H24N2O5; PlaSMA ID-1845	8.96605	337.177	4267.03	10560.2	366.821	[M+H]+	Postive					FALSE	337.12964:221 337.17737:4173 337.23389:743 337.27234:341 337.31281:398 338.18008:1159 338.23276:940 338.34167:2067 339.16815:262 339.25076:474 339.29465:252 339.34659:745 340.28778:265 340.92392:222 341.27148:303		976.814
Ouabain	3.86158	585.286	3925.52	10476.7	363.921	[M+H]+	Postive	LPMXVESGRSUGHW-HBYQJFLCSA-N	Lipids and lipid-like molecules	Steroids and steroid derivatives	Steroid lactones	FALSE	585.28583:3837 586.289:815 587.29114:678		819.243
2,4,5-Trimethoxystyrene	7.5688	195.101	2242.66	10410.8	361.629	[M+H]+	Postive	DAINMNHDGRVBQF-UHFFFAOYSA-N	Benzenoids	Phenol ethers	Anisoles	FALSE	194.9734:261 195.10133:2742 195.1353:1126 195.9931:226 196.10458:287 196.96187:740 197.00394:529 197.0784:238 197.11691:706 197.15247:379 198.00397:363 198.12648:644 199.00171:242 199.02962:774 199.09311:331 199.13153:651 199.16873:587 199.99957:1044 200.02309:319		984.727
3-(2,4-dihydroxypentyl)-8-hydroxy-6-methoxyisochromen-1-one	7.61652	295.116	2630.68	10121	351.565	[M+H]+	Postive	CXVPYCSNJZJTRF-UHFFFAOYNA-N	Phenylpropanoids and polyketides	Isocoumarins and derivatives		FALSE	295.11627:2424 295.18744:511 295.22794:727 295.25946:591 295.6395:214 296.21198:204 297.17148:432 297.24155:482 297.2782:409 299.15765:519 299.25674:414		898.609
SM 26:2	9.68835	589.429	3398.86	10102.9	350.935	[M+Na]+	Postive	JTSRIKTVRYLQJD-WTWBOGLWNA-N				FALSE	589.4292:4725 590.43121:881 591.43866:263 593.4447:250		801.054
Tryptophan; PlaSMA ID-689	1.45875	205.097	6731.25	9904.22	344.034	[M+H]+	Postive	QIVBCDIJIAJPQS-UHFFFAOYNA-N	Organoheterocyclic compounds	Indoles and derivatives	Indolyl carboxylic acids and derivatives	FALSE	204.95396:444 205.06548:1486 205.09746:6939 205.15446:272 206.10118:999 206.91498:856 206.9874:334 207.06174:896 207.09778:395 207.17342:225 207.98889:916 208.13234:371 208.98691:334 209.08052:280 209.11607:236 209.15416:719 209.98613:275		994.327
Leucine; PlaSMA ID-100	0.511033	132.102	6532.78	9865.77	342.699	[M+H]+	Postive	ROHFNLRQFUQHCH-UHFFFAOYNA-N	Organic acids and derivatives	Carboxylic acids and derivatives	Amino acids, peptides, and analogues	FALSE	131.9295:2629 131.96416:240 132.00275:1544 132.10165:7271 132.97289:264 133.00722:2359 133.07916:511 133.103:876 133.92604:1207 134.00188:256 134.05136:256 134.0856:218 134.99176:289 135.02251:1165 135.04314:565 135.07924:316 136.06097:365 136.07707:211 136.93149:247 137.02171:484 137.05972:484 137.09558:668		978.374
Ponatinib (AP24534)	6.88908	267.116	2351.05	9785.53	339.912	[M+H]+	Postive	PHXJVRSECIGDHY-UHFFFAOYSA-N	Benzenoids	Benzene and substituted derivatives	Anilides	FALSE	267.11572:4380 267.18759:623 267.22195:515 267.90009:232 268.11697:561 269.12759:231 269.16571:389 269.20459:319 269.23886:309 270.17422:254 270.93799:1115 271.18091:392 271.22241:503 271.95267:232		807.556
(E)-3-(4-methoxyphenyl)-1-[2,4,6-trimethoxy-3-(3-methylbut-2-enyl)phenyl]prop-2-en-1-one	7.61652	397.202	3100.27	9766.58	339.253	[M+H]+	Postive	GGNVSANPVOEGII-UHFFFAOYSA-N	Phenylpropanoids and polyketides	Linear 1,3-diarylpropanoids	Chalcones and dihydrochalcones	FALSE	397.20245:2719 397.2879:601 397.36093:232 397.62091:225 398.20425:495 398.29474:213 399.17346:207 399.3056:433 400.2085:225 400.38248:208 401.35001:215		910.964
5,6,16-Trihydroxygrayanotox-10-en-3-yl hexopyranoside	10.5204	481.285	4346.11	9737.43	338.241	[M+Na]+	Postive	ANXMAYKAWZAHMB-UHFFFAOYNA-N	Organic oxygen compounds	Organooxygen compounds	Carbohydrates and carbohydrate conjugates	FALSE	481.2854:4682 482.28857:986 482.42786:224 483.2912:504		800.481
Pyroglutamic acid (Not validated); PlaSMA ID-39	0.346833	128.035	1460.06	9597.97	333.396	[M-H]-	Negative	ODHCTXKNWHHXJC-UHFFFAOYNA-N	Organic acids and derivatives	Carboxylic acids and derivatives	Amino acids, peptides, and analogues	FALSE	127.89774:2609 128.03497:2431 128.0697:210 128.90405:233 129.01929:369 129.99422:8186 130.05217:208 130.08688:1240 130.90425:233 130.99469:384 131.67844:236 131.91597:327 131.99118:6666 132.03545:368 132.86713:1346 132.89919:3364 132.93317:582 133.01385:724 133.0289:459		986.371
Ethyldodecanoate	9.37822	227.201	1681.19	9579.83	332.766	[M-H]-	Negative	MMXKVMNBHPAILY-UHFFFAOYSA-N	Lipids and lipid-like molecules	Fatty Acyls	Fatty acid esters	FALSE	226.97896:825 227.20129:2263 228.20374:514 228.99802:957 230.98758:332 231.94655:251		967.729
(E)-5-hydroxyundec-2-enoic acid	7.65848	242.176	3892.37	9564.31	332.227	[M+H]+	Postive	MWMIRIBJWGECFI-UHFFFAOYNA-N				FALSE	242.13881:211 242.17607:4214 242.28242:439 243.09654:247 243.1678:973 245.10341:304 245.13264:449		933.731
FA 12:1+1O; PlaSMA ID-298	5.45058	213.148	1650.53	9474.91	329.122	[M-H]-	Negative	RRJILZUCEDMMNU-UHFFFAOYSA-N	Organic acids and derivatives	Hydroxy acids and derivatives	Medium-chain hydroxy acids and derivatives	FALSE	212.83392:380 212.91071:249 213.05524:907 213.14769:1283 214.37311:297 214.85777:230 215.16608:221 216.06343:222 216.88152:248		942.656
Valylvaline; PlaSMA ID-809	0.359583	217.155	2165.98	9458.25	328.543	[M+H]+	Postive	KRNYOVHEKOBTEF-UHFFFAOYNA-N	Organic acids and derivatives	Carboxylic acids and derivatives	Amino acids, peptides, and analogues	FALSE	217.01895:893 217.07953:592 217.10818:891 217.15506:2975 217.53851:200 217.6302:315 218.00699:324 218.02693:252 218.11806:367 218.1832:522 219.04581:3138 219.13785:532 219.17088:277 219.53651:213 219.62445:573 219.94803:224 220.0489:234 221.04268:531 221.11722:384 221.15527:380 221.41534:256 222.11211:2259 222.14462:339		972.032
2-Hydroxyisobutyric acid	0.346833	103.039	1233.35	9382.14	325.899	[M-H]-	Negative	BWLBGMIXKSTLSX-UHFFFAOYSA-N	Organic acids and derivatives	Hydroxy acids and derivatives	Alpha hydroxy acids and derivatives	FALSE	103.00312:856 103.03929:1688 103.05985:221 105.01835:537 105.96037:1271		977.216
Methyl jasmonate	5.76158	225.148	3693.51	9323.39	323.858	[M+H]+	Postive	GEWDNTWNSAZUDX-WQMVXFAESA-N	Lipids and lipid-like molecules	Fatty Acyls	Lineolic acids and derivatives	FALSE	225.00044:366 225.10522:396 225.14789:3282 225.18732:878 226.15182:334 226.17996:1460 227.12473:269 227.17648:1849 227.19798:1340 228.16928:668 229.10623:206 229.1398:411 229.15808:360		974.679
Piperidine	0.359583	86.097	2043.55	9321.82	323.804	[M+H]+	Postive	NQRYJNQNLNOLGT-UHFFFAOYSA-N	Organoheterocyclic compounds	Piperidines		FALSE	86.00854:571 86.09695:5465 86.93728:220 86.95255:306 87.04355:500 87.09853:328 87.92438:382 88.93095:684 88.98193:1291 89.06107:761 89.50629:385 89.93999:338 90.05472:312 90.90379:428 91.05652:272		979.77
2H-Pyrido[1,2-a][1,4,7,10]tetraazacyclododecine-1,4,7,10(3H,12H)-tetrone, 3-(7,8-dihydroxy-6-oxooctyl)octahydro-9-(1-methylpropyl)-6-(phenylmethyl)-	7.6227	569.333	2358.06	9289.69	322.688	[M+H]+	Postive	YSNRSVKJRYQIIA-UHFFFAOYNA-N	Organic acids and derivatives	Carboxylic acids and derivatives	Amino acids, peptides, and analogues	FALSE	569.33264:2305 570.33521:958 571.33734:332 572.29871:337 573.51398:470		951.478
Sorbose	0.32955	179.056	1677.45	9244.8	321.129	[M-H]-	Negative	BJHIKXHVCXFQLS-OTWZMJIISA-N	Organic oxygen compounds	Organooxygen compounds	Carbohydrates and carbohydrate conjugates	FALSE	178.8587:761 179.05576:2773 179.85928:402 179.95056:370 180.85745:492 181.07149:1970 182.02112:437 182.07513:454 182.83389:316 182.85881:1074 182.92014:204 183.6839:238 184.04044:1331		970.51
FA 9:1+1O; PlaSMA ID-163	4.47597	171.102	1690.52	9239.51	320.945	[M-H]-	Negative	WLGDDELKYAWBBL-UHFFFAOYSA-N	Lipids and lipid-like molecules	Fatty Acyls	Fatty acids and conjugates	FALSE	170.83327:2324 171.04498:285 171.10229:2048 171.83362:409 171.98251:229 172.83322:2009 173.11668:889 174.8371:1460 174.90866:219 174.95656:242 175.84651:356		965.876
Nialamide	4.07608	297.134	3675.48	9220.14	320.272	[M-H]-	Negative	NOIIUHRQUVNIDD-UHFFFAOYSA-N	Organoheterocyclic compounds	Pyridines and derivatives	Pyridinecarboxylic acids and derivatives	FALSE	296.98038:494 297.13382:4227 297.73331:321 298.13742:858 299.14816:233 301.15512:205		917.562
alpha-Lapachone	0.261483	243.103	3300.4	9120.41	316.808	[M+H]+	Postive	PJWHOPKRRBUSDH-UHFFFAOYSA-N	Organoheterocyclic compounds	Naphthopyrans	Naphthopyranones	FALSE	242.61105:345 242.99928:411 243.0275:269 243.10269:7429 243.15901:493 243.60573:1762 244.10442:969 244.86591:653 245.86372:433 245.94533:268 246.03268:249 246.86295:3555 246.90523:222 246.94891:452 247.03487:253 247.88638:207 247.91876:278 247.9427:4644		956.269
Sorbitol	0.295733	181.072	2000.8	9005.05	312.801	[M-H]-	Negative	FBPFZTCFMRRESA-JGWLITMVSA-N	Organic oxygen compounds	Organooxygen compounds	Carbohydrates and carbohydrate conjugates	FALSE	180.85966:750 180.93117:380 180.97337:276 181.01385:343 181.07213:5344 182.01683:214 182.07393:246 182.83231:469 182.87537:317 182.91156:301 182.92863:394 182.98984:273 183.02261:213 183.9088:204 184.036:382 184.82941:365 184.8764:314 184.91032:256 184.93912:567 185.02313:587 186.02177:253 186.04105:352		986.856
4,7,8-trimethoxy-3,5-dimethylchromen-2-one	3.3962	282.134	3958.26	8951.35	310.935	[M+H]+	Postive	PKKTXAMCHLIVDS-UHFFFAOYSA-N	Phenylpropanoids and polyketides	Coumarins and derivatives		FALSE	282.13345:4075 282.21204:235 282.27792:1573 283.13705:769 283.19122:286 283.22943:433 283.28329:437 284.25687:207 284.89215:303 285.17139:318 285.20737:396 285.24329:632 285.90793:210 286.24323:366 286.27933:274		980.436
Glucose	0.32955	179.055	1677.45	8942.93	310.643	[M-H]-	Negative	GZCGUPFRVQAUEE-SLPGGIOYSA-N	Organic oxygen compounds	Organooxygen compounds	Carbohydrates and carbohydrate conjugates	FALSE	178.85887:426 178.89153:321 178.94591:410 178.99245:329 179.01422:280 179.05515:2899 179.85855:453 180.05769:296 180.85966:750 180.93117:380 180.97337:276 181.01385:343 181.07213:5344 182.01683:214 182.07393:246 182.83231:469 182.87537:317 182.91156:301 182.92863:394 182.98984:273 183.02261:213 183.9088:204 184.036:382		983.535
PE 34:10	3.03148	722.384	3359.16	8894.58	308.963	[M+H]+	Postive	NXEXXHKBMBOWCS-UGWFXVJBNA-N	Lipids and lipid-like molecules	Glycerophospholipids	Glycerophosphoethanolamines	FALSE	722.38397:3390 723.38654:1029 723.77094:256 724.3783:290		826.932
C27H40O11; PlaSMA ID-2813	3.71143	541.261	3023.65	8841.08	307.105	[M+H]+	Postive					FALSE	541.26093:4905 541.36615:222 542.26514:1320 542.31775:283 543.26538:999 543.4679:274 544.26941:216		844.319
Ketoisovaleric acid	0.411167	115.04	1478.48	8793.27	305.444	[M-H]-	Negative	QHKABHOOEWYVLI-UHFFFAOYSA-N	Organic acids and derivatives	Keto acids and derivatives	Short-chain keto acids and derivatives	FALSE	114.93576:9223 114.98886:215 115.02042:1111 115.03981:2658 115.91856:316 115.93957:653 116.93148:8057 116.96981:304 117.05369:759 117.92832:328 118.02911:565 118.04616:227 118.92393:542 119.03487:1425 119.05595:273 119.94698:471 119.97575:429 119.99267:366		973.1
12-Oxopimara-9(11),15-dien-18-oic acid	6.70617	361.202	1628.04	8731.57	303.301	[M-H]-	Negative	VNOMXNULTAUIDL-UHFFFAOYNA-N	Lipids and lipid-like molecules	Prenol lipids	Diterpenoids	FALSE	361.07196:216 361.15982:687 361.2023:1288		914.452
2-Palmitoylglycerol	9.57228	331.286	4086.75	8655.27	300.651	[M+H]+	Postive	BBNYCLAREVXOSG-UHFFFAOYSA-N	Lipids and lipid-like molecules	Glycerolipids	Monoradylglycerols	FALSE	331.20947:211 331.28558:4161 332.20572:311 332.2886:1147 333.28772:323 334.22903:249 334.3089:422		932.829
L-Lysine	0.313233	147.114	1432.76	8647.52	300.382	[M+H]+	Postive	KDXKERNSBIXSRK-YFKPBYRVSA-N	Organic acids and derivatives	Carboxylic acids and derivatives	Amino acids, peptides, and analogues	FALSE	146.94972:321 147.02348:3415 147.07285:262 147.11359:1279 147.98141:268 148.06047:644 148.94582:1516 149.02037:391 149.07037:286 149.12929:868 150.00206:406 150.01755:377 150.07785:10809 150.94299:486 151.08202:1355 151.11212:405		967.267
1H-Indene-3-carboxylic acid, 3a,4,5,6,7,7a-hexahydro-3a,7,7-trimethyl-	6.20558	209.154	2987.49	8621.17	299.466	[M+H]+	Postive	ACQRUPZAAPLQQP-UHFFFAOYNA-N	Organic acids and derivatives	Carboxylic acids and derivatives	Carboxylic acids	FALSE	208.91005:308 209.07726:347 209.11316:423 209.15411:2946 209.1916:308 209.98952:202 210.15526:490 211.09666:369 211.13148:741 211.16891:1093 211.9901:259 212.14218:480 213.11177:522 213.14961:487 213.18555:341 214.03011:223 214.11726:304		982.301
C18H20N2O4	3.01295	329.15	3082.93	8493.6	295.035	[M+H]+	Postive	CCDXRMSTRMQFCG-UHFFFAOYNA-N	Organoheterocyclic compounds	Pyridines and derivatives	Pyridinecarboxylic acids and derivatives	FALSE	329.14975:3211 329.23193:248 329.26395:315 330.15372:731 333.20599:262 333.23752:314		981.784
2(1H)-Azulenone, 6-(beta-D-glucopyranosyloxy)-4,5,6,7,8,8a-hexahydro-5-hydroxy-5-(1-hydroxy-1-methylethyl)-3,8-dimethyl-	3.38307	453.209	3202.41	8483.34	294.679	[M+H]+	Postive	HVAVGMDRUJHUOH-UHFFFAOYNA-N	Lipids and lipid-like molecules	Prenol lipids	Terpene glycosides	FALSE	453.20905:4285 453.28748:318 453.39694:278 454.21039:985 455.20755:475 457.31424:256		980.388
(2E)-3-[(3aS,4S,5R,7aS)-7a-Hydroxy-5-isopropyl-3-oxooctahydro-2-benzofuran-4-yl]-2-(hydroxymethyl)acrylic acid	4.0895	321.131	3568.45	8418.81	292.437	[M+Na]+	Postive	WGNDRSIKIXVFLD-UHFFFAOYNA-N	Lipids and lipid-like molecules	Prenol lipids	Terpene lactones	FALSE	321.13107:3959 321.24399:606 322.13522:807 323.1871:394 323.21884:380 323.25632:423 323.29297:276 324.01236:211 325.23767:481 325.27264:861		977.381
Arginine	0.3243	175.118	2304.81	8415.2	292.312	[M+H]+	Postive	ODKSFYDXXFIFQN-BYPYZUCNSA-N	Organic acids and derivatives	Carboxylic acids and derivatives	Amino acids, peptides, and analogues	FALSE	174.95349:2130 175.01785:20953 175.1183:3439 175.97568:1417 176.02127:1353 176.09621:276 176.12436:590 176.9505:431 177.00688:1039 177.03217:916 177.06955:4098 177.13115:355 177.97606:208 178.02119:731 178.07176:205 179.01366:898 179.06345:425 179.10461:584 179.51315:224 179.99084:1516 180.09338:332		957.225
Cortodoxone	7.44078	345.208	2860.11	8307.86	288.583	[M-H]-	Negative	WHBHBVVOGNECLV-UHFFFAOYNA-N	Lipids and lipid-like molecules	Steroids and steroid derivatives	Hydroxysteroids	FALSE	345.20764:3323 346.20975:719 346.87079:2203 347.21649:304 348.86771:1022 348.89294:489		968.738
(4beta,5beta,6beta,22R)-4,27-Dihydroxy-5,6:22,26-diepoxyergosta-2,24-diene-1,26-dione	7.61652	488.301	2645.55	8299.04	288.277	[M+H]+	Postive	DBRXOUCRJQVYJQ-UHFFFAOYNA-N	Lipids and lipid-like molecules	Steroids and steroid derivatives	Steroid lactones	FALSE	488.30118:2440 489.13672:372 489.21417:9381 489.30267:1180 490.21729:3316 490.3056:215 491.21094:5579 492.21533:1595 493.20804:929		927.91
Alanylleucine (isomer of 674); PlaSMA ID-675	0.359583	203.139	1772.07	8286.08	287.827	[M+H]+	Postive	RDIKFPRVLJLMER-UHFFFAOYNA-N	Organic acids and derivatives	Carboxylic acids and derivatives	Amino acids, peptides, and analogues	FALSE	203.01439:662 203.04649:221 203.07822:374 203.11041:483 203.13904:4133 204.08655:596 204.12851:527 205.0309:4020 205.06075:1449 205.08952:785 205.12135:495 205.13376:414 205.15724:297 205.62326:241 206.02753:241 206.09827:597 206.45601:268 206.9155:345 206.98689:453 207.00514:682 207.03259:223 207.0786:366 207.12428:23876 207.17749:549 207.64062:1072 207.94865:205 208.05975:250 208.1042:605 208.1…		974.213
C5H9NO2; PlaSMA ID-48	0.3153	116.071	1871.71	8277.71	287.536	[M+H]+	Postive					FALSE	115.95691:746 116.04594:344 116.0713:2663 116.97556:4734 117.05595:229 117.09717:527 117.95385:392 118.08601:22418 119.02816:3455 119.06017:271 119.08904:1368 119.10345:2166 119.97848:1104 120.03069:228 120.06455:752 120.10204:5530 121.05087:4717		984.66
Creatine	2.55923	261.129	1699.89	8223.24	285.644	[M-H]-	Negative	CVSVTCORWBXHQV-UHFFFAOYSA-N	Organic acids and derivatives	Carboxylic acids and derivatives	Amino acids, peptides, and analogues	FALSE	260.81519:295 261.12866:1797 262.12631:573 263.85345:253		942.912
9-methanesulfinylnonanoic acid; PlaSMA ID-314	5.95188	219.103	2332.8	8181	284.176	[M-H]-	Negative	XZYIQKMSOAQJCG-UHFFFAOYNA-N	Lipids and lipid-like molecules	Fatty Acyls	Fatty acids and conjugates	FALSE	219.10268:2163 219.8455:3507 220.10689:424 220.82141:212 221.79863:278 221.84193:1915 222.83249:472 223.79988:440 223.83849:686 223.99693:255		914.491
Ropivacaine	7.36658	275.209	3375.23	8143.97	282.89	[M+Na]+	Postive	ZKMNUMMKYBVTFN-HNNXBMFYSA-N	Organic acids and derivatives	Carboxylic acids and derivatives	Amino acids, peptides, and analogues	FALSE	274.93362:274 275.16452:278 275.20935:3223 275.93866:233 276.21609:437 277.17734:234 277.85825:269 279.0921:360 279.19525:269 279.22784:495 279.95029:240 280.15778:221		898.256
Scytophycin C	4.43252	828.513	3781.96	8124.28	282.206	[M+H]+	Postive	PNDDYPOQKFXUHY-UHFFFAOYNA-N	Lipids and lipid-like molecules	Prenol lipids	Terpene lactones	FALSE	828.51288:3586 829.51562:1733 833.46844:427		807.661
Perindopril	9.63997	369.239	3716.81	8107.79	281.633	[M+H]+	Postive	IPVQLZZIHOAWMC-LEOABGAYSA-N	Organic acids and derivatives	Carboxylic acids and derivatives	Amino acids, peptides, and analogues	FALSE	369.23883:3709 370.24335:760 371.23978:309		982.011
2-(Dimethylamino)-5,6-dimethyl-4-pyrimidinyl dimethylcarbamate	9.6863	261.131	3681.27	8025.6	278.778	[M+H]+	Postive	YFGYUFNIOHWBOB-UHFFFAOYSA-N	Organic nitrogen compounds	Organonitrogen compounds	Amines	FALSE	261.13101:4326 262.13269:413 264.19711:280 264.23114:4160 265.13864:258 265.17285:286 265.23422:663		952.959
(1R,4S,7S,8S,9R,12E,20R,21R,22S,23S)-7,8,21,22,23-Pentahydroxy-12,16-dimethyl-3,5,10,19,24-pentaoxatricyclo[18.3.1.0~4,9~]tetracos-12-en-11-one	0.261483	485.197	2776.75	8003.13	277.998	[M+H]+	Postive	OGCGLORCFYTCJG-UHFFFAOYNA-N	Organic oxygen compounds	Organooxygen compounds	Carbohydrates and carbohydrate conjugates	FALSE	484.70462:260 484.74063:204 485.01392:202 485.19675:5979 485.68991:676 486.19836:1587 487.63965:246		937.067
AcetylPhenylalanine; PlaSMA ID-270	2.91638	206.082	2097.12	7984.03	277.334	[M-H]-	Negative	CBQJSKKFNMDLON-UHFFFAOYNA-N	Organic acids and derivatives	Carboxylic acids and derivatives	Amino acids, peptides, and analogues	FALSE	205.86639:552 206.0817:2498 208.08954:255		956.488
5-Ethyl-2'-deoxyuridine	0.359583	257.115	1874.25	7978.1	277.128	[M+H]+	Postive	XACKNLSZYYIACO-UHFFFAOYSA-N	Nucleosides, nucleotides, and analogues	Pyrimidine nucleosides	Pyrimidine 2'-deoxyribonucleosides	FALSE	256.64069:654 256.66412:252 257.1145:5406 257.17093:962 257.65948:685 257.91635:274 258.11093:3080 258.16:1406 258.66238:731 259.11386:558 259.16629:1943 259.22583:202 259.60129:281 259.6503:491 259.66638:278 260.09146:223 260.12634:324 260.16098:2256 260.19745:15716 260.45883:245 261.10602:300 261.15067:989 261.19998:2482 261.61041:346 261.65823:241		896.275
4,6,8-Decatrienamide, 3-hydroxy-2,2,4-trimethyl-10-(5-oxazolyl)-, (3R,4Z,6Z,8E)-	3.71143	313.154	2548.24	7963.12	276.608	[M+H]+	Postive	MRTUFVRJHFZVOT-UHFFFAOYNA-N	Organoheterocyclic compounds	Azoles	Oxazoles	FALSE	312.97327:437 313.15369:4039 313.1994:536 313.23425:576 313.26996:322 313.30862:346 314.15784:874 315.1521:331 315.17801:394 317.16614:243 317.25406:269 317.28131:204		939.616
Pentasaccharides (Hex-Hex-Hex-Hex-Hex); PlaSMA ID-2086	0.343533	827.269	1541.07	7924.97	275.283	[M-H]-	Negative	FTNIPWXXIGNQQF-UHFFFAOYNA-N	Organic oxygen compounds	Organooxygen compounds	Carbohydrates and carbohydrate conjugates	FALSE	827.26917:2884 827.33765:259 828.27362:627 829.26825:279		958.273
1-hexylamine	0.359583	102.128	1823.4	7868.89	273.335	[M+H]+	Postive	BMVXCPBXGZKUPN-UHFFFAOYSA-N	Organic nitrogen compounds	Organonitrogen compounds	Amines	FALSE	102.01358:4890 102.05378:249 102.06421:323 102.12771:5218 103.01752:254 103.03674:463 103.05391:299 103.13137:297 104.00922:524 104.05488:474 104.07005:518 104.10801:399 105.01192:467 105.02708:213 105.07018:258 105.52677:257 105.96287:288 106.0304:234 106.06424:262 106.5237:745 106.99125:1237 107.02666:802 107.04368:1357 107.08543:234		994.84
Indole-3-acetyl-L-valine	5.66997	273.124	1783.28	7848.39	272.623	[M-H]-	Negative	AZEGJHGXTSUPPG-UHFFFAOYNA-N	Organic acids and derivatives	Carboxylic acids and derivatives	Amino acids, peptides, and analogues	FALSE	272.7666:240 273.12375:3041 273.82611:262 274.12537:459 275.20233:585 275.8244:387 276.03943:258 276.76053:269 277.76862:925		984.582
6-[(3R,4S,5S,7R)-7-[(2S,3S,5S)-5-ethyl-5-[(2R,5R,6S)-5-ethyl-5-hydroxy-6-methyloxan-2-yl]-3-methyloxolan-2-yl]-4-hydroxy-3,5-dimethyl-6-oxononyl]-2-hydroxy-3-methylbenzoic acid	9.48885	591.385	2563.69	7824.95	271.809	[M+H]+	Postive	BBMULGJBVDDDNI-UHFFFAOYNA-N	Lipids and lipid-like molecules	Prenol lipids	Terpene glycosides	FALSE	591.38452:3999 592.39014:1535 593.38629:474 594.38733:266 594.57684:222 595.39844:246		866.174
Thymidine-3',5'-cyclic monophosphate sodium salt	0.32955	303.036	1492.11	7809.7	271.279	[M-H]-	Negative	QSJFDOVQWZVUQG-UHFFFAOYNA-N	Organoheterocyclic compounds	Diazines	Pyrimidines and pyrimidine derivatives	FALSE	303.03601:1355 303.06491:758 304.06342:343 305.02982:358 306.07458:226 306.13535:204 306.97974:376		812.49
1-Hydroxy-2-naphthoic acid	0.32955	187.04	1302.72	7732.18	268.586	[M-H]-	Negative	SJJCQDRGABAVBB-UHFFFAOYSA-N	Benzenoids	Naphthalenes	Naphthalenecarboxylic acids and derivatives	FALSE	186.70857:255 187.04025:1035 187.06622:232 187.10797:478 188.05664:1845 188.981:225 189.05968:256 189.0864:286 191.05585:211 192.0076:799		952.263
Furo[3,4-i]pyrano[3,2-a]xanthene-3,11-dione, 1,2,4a,5,6,6a,9,13,13a,13b-decahydro-4a-(1-hydroxy-1-methylethyl)-12-methoxy-6a,8,13b-trimethyl-, (6aS,13aR,13bR)-	6.88908	445.223	1966.71	7699.03	267.435	[M+H]+	Postive	HXJGKPQYSSUARF-UHFFFAOYNA-N	Organoheterocyclic compounds	Benzopyrans	1-benzopyrans	FALSE	445.22305:3358 446.2424:23777 446.32056:549 447.24643:6240 447.37488:223 448.24728:868 448.98819:201 449.09323:210 449.2421:232 449.42148:232		883.362
4-IMIDAZOLEACETIC ACID	0.755883	125.036	1733.17	7693.03	267.226	[M-H]-	Negative	PRJKNHOMHKJCEJ-UHFFFAOYSA-N	Organoheterocyclic compounds	Azoles	Imidazoles	FALSE	125.03564:1937 125.89979:6669 126.05622:558 127.05906:249 127.89719:1809 128.03339:377 128.06998:215 129.01863:545 129.05592:227 129.99487:746		977.03
2,4,6,8-Decatetraenedioic acid, mono[5-methoxy-4-[2-methyl-3-(3-methyl-2-buten-1-yl)oxiranyl]-1-oxaspiro[2.5]oct-6-yl] ester, (2E,4E,6E,8E)-	10.0168	457.225	2295.43	7666.68	266.311	[M-H]-	Negative	NGGMYCMLYOUNGM-UHFFFAOYNA-N	Lipids and lipid-like molecules	Fatty Acyls	Fatty acids and conjugates	FALSE	456.8381:290 457.22501:4263 457.31534:202 458.22678:1644 458.27621:272 459.22891:287 459.85205:339 460.23615:213		931.626
Guanine	0.359583	152.057	1775.01	7609.58	264.328	[M+H]+	Postive	UYTPUPDQBNUYGX-UHFFFAOYSA-N	Organoheterocyclic compounds	Imidazopyrimidines	Purines and purine derivatives	FALSE	151.94788:270 152.05733:5003 152.10272:1015 153.05727:981 153.09517:839 153.12466:257 153.95406:401 153.97112:292 153.99741:311 154.09622:369 154.12273:212 154.96753:532 155.08214:2524 155.10701:1225 155.14186:426 155.97182:277 156.02571:274 156.07747:925 156.11148:293 156.98087:248		972.789
cytosine	0.359583	112.05	1399.53	7569.91	262.95	[M+H]+	Postive	OPTASPLRGRRNAP-UHFFFAOYSA-N	Organoheterocyclic compounds	Diazines	Pyrimidines and pyrimidine derivatives	FALSE	111.94603:204 111.96668:259 111.98507:1422 112.05051:3665 112.08519:484 112.11354:323 112.95694:577 112.98817:304 113.03554:395 113.06075:1194 113.10608:392 113.96375:1896 114.06577:531 114.09174:1335 114.98587:1181 115.02032:583 115.04986:503 115.0872:3305 115.95995:233 116.05234:392 116.07175:1298 116.9767:10091 117.01626:278		980.437
C11H20N2O3S; PlaSMA ID-1145	1.49868	261.13	3000.52	7542.92	262.012	[M+Na]+	Postive					FALSE	260.6506:318 261.13019:3454 261.18365:294 262.13354:296 263.14478:559 263.23642:305 263.95639:209 264.95905:407 265.14575:443 265.21542:432 265.9332:227		925.904
4-hydroxy-7-methyl-2-[2-[3,4,5-trihydroxy-6-(hydroxymethyl)oxan-2-yl]oxypropan-2-yl]-2,3-dihydrofuro[3,2-g]chromen-5-one	11.6931	483.149	1522.87	7496.69	260.406	[M-H]-	Negative	KHWKLNXMSVVKCH-UHFFFAOYNA-N	Organoheterocyclic compounds	Benzopyrans	1-benzopyrans	FALSE	482.91498:220 483.14941:1920 484.15347:370 484.88181:593 485.98499:209 486.75394:263 486.88367:221 487.31003:212		958.693
Rakicidin B	7.28415	621.418	2387.73	7482.39	259.91	[M+Na]+	Postive	AKYUFOZFLOQQQL-UHFFFAOYNA-N	Organic acids and derivatives	Peptidomimetics	Depsipeptides	FALSE	621.41827:2314 622.4223:959 623.28784:223		880.882
Spiroxamine	8.93307	298.275	4038.66	7477.55	259.741	[M+H]+	Postive	PUYXTUJWRLOUCW-UHFFFAOYSA-N	Organic oxygen compounds	Organooxygen compounds	Ethers	FALSE	298.27512:4733 298.87741:212 299.1846:679 299.27676:867 301.28354:217 302.91812:4570		950.029
N-Acetylhistamine	0.3153	154.096	2168.83	7424.88	257.912	[M+H]+	Postive	XJWPISBUKWZALE-UHFFFAOYSA-N	Organic acids and derivatives	Carboxylic acids and derivatives	Carboxylic acid derivatives	FALSE	154.02686:259 154.09634:3025 154.98039:384 155.07993:1908 155.10458:1101 155.12802:446 155.14474:231 155.97073:324 156.08542:1551 156.97681:355 157.08434:933 157.1254:229 157.9651:900 158.00258:13619 158.04936:274 158.97285:2140 159.00494:1072 159.06473:236		958.447
DGTS 30:5	7.83367	674.503	2593.84	7336.15	254.83	[M+H]+	Postive	AGFJNIXDINMQSQ-BOSZLVJWSA-N	Lipids and lipid-like molecules	Glycerolipids	Triradylcglycerols	FALSE	674.50287:2886 675.50995:645 678.67664:217 679.45715:1639		827.395
8-(2,3-dihydroxy-3-methylbutyl)-5,7-dimethoxy-2-phenyl-2,3-dihydrochromen-4-one	7.03022	409.161	2963.62	7263.34	252.301	[M+H]+	Postive	SDEUJZQQWGXEEM-UHFFFAOYNA-N	Phenylpropanoids and polyketides	Flavonoids	Flavans	FALSE	409.16086:3578 409.28973:202 409.36612:271 410.16165:629 411.21347:299 411.34396:769 411.37622:304 413.32336:238		953.366
(2S,3S,9R,13R,14S,16R)-2,3,16-trihydroxy-17-[(2R)-2-hydroxy-6-methyl-3-oxohept-6-en-2-yl]-4,4,9,13,14-pentamethyl-1,2,3,7,8,10,12,15,16,17-decahydrocyclopenta[a]phenanthren-11-one	9.511	503.334	2530.4	7217.92	250.723	[M+H]+	Postive	JQKLZAQSMGFZSI-UHFFFAOYNA-N	Lipids and lipid-like molecules	Steroids and steroid derivatives	Cucurbitacins	FALSE	503.04587:601 503.33447:4700 504.33752:923 505.34402:644 507.27252:301 507.32938:332 507.84662:240 508.26813:238		902.457
D-beta-Homophenylalanine	2.29842	178.087	1635.3	7161.28	248.755	[M-H]-	Negative	OFVBLKINTLPEGH-SECBINFHSA-N	Organic acids and derivatives	Carboxylic acids and derivatives	Amino acids, peptides, and analogues	FALSE	177.84479:5456 177.90309:327 178.08678:1811 178.84291:461 178.85797:980 178.90581:259 178.95084:305 179.08681:256 179.84143:6285 180.85931:523 181.08864:402 181.83861:3612 182.86066:257 182.98878:3122		958.244
beta-D-Glucopyranose, 6-O-beta-D-glucopyranosyl-1-O-[(2,6,6-trimethyl-1-cyclohexen-1-yl)carbonyl]-	0.250417	515.209	2876.19	7037.54	244.457	[M+H]2+	Postive	URTXXFGOVQACIC-UHFFFAOYNA-N	Organic oxygen compounds	Organooxygen compounds	Carbohydrates and carbohydrate conjugates	FALSE	514.71881:407 515.20862:3003 515.70831:1765 516.21228:774		967.064
Bortezomib (Velcade)	6.7642	407.183	2614.35	7005.79	243.354	[M+H]+	Postive	GXJABQQUPOEUTA-RDJZCZTQSA-N	Organic acids and derivatives	Carboxylic acids and derivatives	Amino acids, peptides, and analogues	FALSE	407.18274:3311 407.31259:254 407.35071:494 407.38852:336 408.02673:267 408.18964:536 408.30725:434 409.17209:429 409.25439:332 409.31693:304 410.79675:222 411.20938:276 411.23444:320 411.34894:253		913.879
C15H22O3	4.8519	268.191	2557.94	7004.39	243.306	[M+H]+	Postive	OZFIJBRLEXJLPY-UHFFFAOYNA-N	Lipids and lipid-like molecules	Prenol lipids	Sesquiterpenoids	FALSE	267.91049:317 268.1907:3022 268.22955:350 268.92212:312 269.14026:261 269.20966:1296 269.24789:611 270.21667:571 270.94537:14649 271.19281:321 271.94687:1549 272.23163:820 272.91379:296 272.94315:7594 273.09186:279 273.1377:226 273.16986:282		937.78
2(1H)-Naphthalenone, 8-[5-(acetyloxy)-3-methylpentyl]octahydro-4,4,8a-trimethyl-7-methylene-	9.52412	371.256	2192.24	6985.24	242.64	[M+H]+	Postive	LZGVQJDYLAUCGI-UHFFFAOYNA-N	Lipids and lipid-like molecules	Prenol lipids	Diterpenoids	FALSE	371.16293:483 371.25644:2137 371.2988:428 372.25964:860 373.25241:284 374.30252:12232 375.3071:2426 375.35834:234		922.23
Norfentanyl	5.69955	233.162	3031.83	6856.1	238.155	[M+H]+	Postive	PMCBDBWCQQBSRJ-UHFFFAOYSA-N	Benzenoids	Benzene and substituted derivatives	Anilides	FALSE	233.11017:385 233.16187:4044 234.16565:723 235.16985:291 235.20667:404 236.16209:1501 236.90602:267 236.9334:218 237.16029:499 237.22214:226		817.847
[(2'R,3R,4a'S,5S,5'R,6'S,8a'S)-6'-Acetoxy-5-(3-furyl)-2'-methyl-2,4'-dioxooctahydrodispiro[furan-3,1'-naphthalene-5',2''-oxiran]-4a'(2'H)-yl]methyl acetate	7.17807	461.175	2713.99	6853.56	238.066	[M+H]+	Postive	UWRDCNVTKORVMI-UHFFFAOYNA-N	Lipids and lipid-like molecules	Prenol lipids	Terpene lactones	FALSE	461.17517:3153 462.17813:739 463.19635:912 463.41605:250 465.19269:518 465.43109:301		832.08
Pilocarpine	0.3243	209.126	2195.55	6830.56	237.267	[M+H]+	Postive	QCHFTSOMWOSFHM-WPRPVWTQSA-N	Alkaloids and derivatives			FALSE	208.90845:617 208.98454:234 209.02539:466 209.05855:676 209.12584:5195 209.15137:1439 209.97423:280 210.12889:357 211.13354:1014 211.16866:831 211.20006:252 212.03148:221 212.13358:242 212.93126:406 212.9635:252 213.00026:801 213.15231:925 213.1839:619		865.348
C22H36O6; PlaSMA ID-995	7.20185	395.245	2742.09	6828.69	237.202	[M-H]-	Negative					FALSE	395.24469:3181 396.24985:446 396.99051:724 399.93481:215		939.491
13-hydroxy-6-(1-hydroxyethyl)-3-(hydroxymethyl)-12,14-dimethyl-15-nonyl-9-propan-2-yl-1-oxa-4,7,10-triazacyclopentadecane-2,5,8,11-tetrone	9.42603	558.378	2289.97	6750.88	234.499	[M+H]+	Postive	CBEIHVWVTGRGDR-UHFFFAOYNA-N	Organic acids and derivatives	Peptidomimetics	Depsipeptides	FALSE	558.37799:2474 558.85608:252 559.38336:1002 559.51434:513 560.39941:258		898.307
Indole-3-acetyl-L-alanine	3.3066	245.092	1508.76	6728.68	233.728	[M-H]-	Negative	FBDCJLXTUCMFLF-UHFFFAOYNA-N	Organic acids and derivatives	Carboxylic acids and derivatives	Amino acids, peptides, and analogues	FALSE	245.09241:1730 245.12975:213 245.79533:209 248.97241:41443 249.96875:813		959.002
Methohexital	2.98615	263.139	2824.55	6691.01	232.42	[M+H]+	Postive	NZXKDOXHBHYTKP-UHFFFAOYSA-N	Organoheterocyclic compounds	Diazines	Pyrimidines and pyrimidine derivatives	FALSE	263.11127:335 263.13855:3474 263.19882:227 263.23218:247 263.95752:254 263.98181:238 264.09961:204 264.14005:451 264.91727:285 264.95648:428 265.13873:535 265.1741:264 265.2179:241 265.24365:214 265.90793:276 266.62219:258 266.88068:241 266.90912:265 266.95398:377 267.05725:252 267.11575:246 267.15942:686 267.19476:1353 267.23022:785 267.90457:573		982.158
(beta-D-Glucopyranosyloxy)(phenyl)acetonitrile	6.78557	318.093	2521.94	6650.33	231.007	[M+H]+	Postive	ZKSZEJFBGODIJW-UHFFFAOYNA-N	Organic oxygen compounds	Organooxygen compounds	Carbohydrates and carbohydrate conjugates	FALSE	318.09268:2784 318.18961:265 318.27936:6258 319.09464:422 319.21829:349 319.28238:2354 320.28558:232 321.20404:279 321.23901:275 321.28015:227 322.9776:291		899.927
4-Acetyl-2-methoxyphenyl beta-D-glucopyranoside	6.08658	351.104	3300.67	6635.71	230.499	[M+H]+	Postive	QUOZWMJFTQUXON-UHFFFAOYNA-N	Organic oxygen compounds	Organooxygen compounds	Carbohydrates and carbohydrate conjugates	FALSE	350.94843:213 351.10361:3658 351.21896:239 352.10657:564 352.29568:411 353.15088:402 353.27194:357 353.30582:290 355.09464:276 355.1337:202 355.21411:333 355.32031:390 355.34897:224		943.014
DGTS 33:5	9.72003	716.551	2940.3	6607.77	229.529	[M+H]+	Postive	BACUDDCWRZWYNH-NBGCXZHJSA-N	Lipids and lipid-like molecules	Glycerolipids	Triradylcglycerols	FALSE	716.55096:3097 717.55524:1746 718.55853:500 718.8407:315 719.8512:264 721.50854:820		856.774
2-(3,4-dihydroxyphenyl)ethyl 4-[2-[2-(3,4-dihydroxyphenyl)ethoxy]-2-oxoethyl]-5-hydroxy-4a,5,7,7a-tetrahydro-4H-furo[3,4-b]pyran-3-carboxylate	7.61652	499.163	2059.04	6582.86	228.663	[M+H]+	Postive	AIPGFMVNUMXXEM-UHFFFAOYNA-N	Benzenoids	Phenols	Tyrosols and derivatives	FALSE	499.11679:438 499.16312:2748 499.2793:233 500.16782:567 500.28363:701 500.37418:275 501.29077:651 502.31427:569 503.30991:1794 503.37155:277		895.944
Naphtho[2,3-c]furan-1(3H)-one, 8-(beta-D-glucopyranosyloxy)-9-hydroxy-	0.32955	377.086	1303.69	6574.45	228.371	[M-H]-	Negative	SGQJDTLFQCDZGS-UHFFFAOYNA-N	Organic oxygen compounds	Organooxygen compounds	Carbohydrates and carbohydrate conjugates	FALSE	377.08615:2007 378.08804:508 379.08163:1448 380.10028:509 381.04831:607		914.089
Isoguvacine	0.359583	128.071	1471.16	6570.93	228.249	[M+H]+	Postive	KRVDMABBKYMBHG-UHFFFAOYSA-N	Organoheterocyclic compounds	Pyridines and derivatives	Hydropyridines	FALSE	127.98306:268 128.03171:413 128.05222:529 128.0705:3654 128.10983:483 128.95123:1119 128.98401:366 129.01524:855 129.05481:627 129.10429:2214 129.97426:366 130.00809:8200 130.0498:1908 130.06253:1355 130.09102:2055 130.15831:841 130.59949:467 130.93288:484 130.97479:548 131.03172:406 131.07219:513 131.0901:457 131.11801:1111 131.93056:1771 132.00334:1012 132.03609:250 132.08009:419 132.10251:3320…		973.419
Methyl 2-(1,3,5-trihydroxy-4a-methyl-8-oxodecahydro-2-naphthalenyl)acrylate	4.0895	299.149	2581.95	6566.79	228.105	[M+H]+	Postive	FLZGWKBABNBFOA-UHFFFAOYNA-N	Organic acids and derivatives	Carboxylic acids and derivatives	Carboxylic acid derivatives	FALSE	299.10999:2740 299.14871:3002 299.21964:323 299.25647:356 300.11304:546 300.15176:502 300.94086:245 301.11609:387 301.15726:324 301.19992:250 302.91507:417		970.493
1,4-Cyclohexanedicarboxylic acid	0.56875	173.078	3915.7	6543.61	227.3	[M+H]+	Postive	PXGZQGDTEZPERC-UHFFFAOYSA-N	Organic acids and derivatives	Carboxylic acids and derivatives	Dicarboxylic acids and derivatives	FALSE	172.95699:1418 173.04391:325 173.07831:4869 173.12799:2166 174.03462:287 174.08054:312 174.11029:412 174.13168:271 174.95134:462 174.98531:455 175.01831:45078 175.47522:222 175.97684:1999 176.02261:2966 176.11862:220 176.13844:245 176.95236:333 176.98412:730 177.02811:571 177.07001:12089 177.11777:229 178.07317:1497		984.07
(3S,5Z,8S,9R)-8,9,16-Trihydroxy-14-methoxy-3-methyl-3,4,9,10,11,12-hexahydro-1H-2-benzoxacyclotetradecine-1,7(8H)-dione	2.84988	365.158	2126.52	6469.93	224.74	[M+H]+	Postive	QXPNJMHRUZCEAP-UHFFFAOYNA-N	Phenylpropanoids and polyketides	Macrolides and analogues	Zearalenones	FALSE	365.15768:2489 365.26941:286 365.29977:302 366.15939:237 367.1539:267 367.24731:428 367.28311:551 367.32196:805 367.35419:319 368.27017:256 369.33783:397 369.36627:270		883.954
Dioctyl Phthalate	10.3692	391.284	3107.53	6434.69	223.516	[M+H]+	Postive	MQIUGAXCHLFZKX-UHFFFAOYSA-N	Benzenoids	Benzene and substituted derivatives	Benzoic acids and derivatives	FALSE	391.22495:420 391.28369:3385 392.28729:1295 393.29208:533 394.28485:213		918.882
Creatinine	0.3243	114.066	1950.93	6411.8	222.721	[M+H]+	Postive	DDRJAANPRJIHGJ-UHFFFAOYSA-N	Organic acids and derivatives	Carboxylic acids and derivatives	Amino acids, peptides, and analogues	FALSE	113.96476:921 114.0658:2971 114.09003:620 114.96746:347 114.98425:539 115.03729:835 115.04707:540 115.08511:865 115.09499:689 115.95589:320 116.0712:1158 116.97582:9364 117.03045:222 117.07197:569 117.10183:453 117.93375:233 117.95445:356 117.9788:361 118.06659:227 118.08563:6792 118.90829:491 119.02769:8844 119.0625:802		840.198
alpha-D-Glucopyranoside, O-beta-D-glucopyranosyl-(1->2)-6-O-[(2E)-2-methyl-1-oxo-2-buten-1-yl]-alpha-D-glucopyranosyl O-beta-D-glucopyranosyl-(1->2)-	2.37518	771.25	2867.72	6374.68	221.432	[M+H]+	Postive	ZPKOPBUGDKNHJM-UHFFFAOYNA-N	Lipids and lipid-like molecules	Saccharolipids		FALSE	771.24963:2957 772.25226:1060 773.24622:227		896.399
Penicillin G	6.7897	335.105	2691.84	6367.8	221.193	[M+NH4]+	Postive	JGSARLDLIJGVTE-UHFFFAOYNA-N	Organic acids and derivatives	Carboxylic acids and derivatives	Amino acids, peptides, and analogues	FALSE	335.10541:2861 335.2244:434 335.26273:281 337.14987:248 337.19733:599 337.23251:342 337.27252:538 338.16953:624 338.23682:478 338.34134:1106 339.0976:246 339.20959:220 339.25458:217 339.28769:738 339.33826:318		901.274
d-Desthiobiotin	0.359583	215.14	1405.81	6309.53	219.169	[M+H]+	Postive	AUTOLBMXDDTRRT-UHFFFAOYNA-N	Organoheterocyclic compounds	Azoles	Imidazoles	FALSE	214.92197:215 215.01758:343 215.06741:238 215.10066:525 215.13988:4111 215.64:332 216.04349:321 216.14186:968 216.64375:1024 216.76863:213 216.9384:245 217.01642:750 217.07037:270 217.12064:869 217.15503:6180 217.44412:264 217.63803:335 218.10329:433 218.15694:1499 219.04449:5373 219.10956:475 219.13342:2325 220.00519:222 220.04758:771 220.13474:543		941.553
[(2S,3R,4S,5S,6R)-4,5-dihydroxy-6-(hydroxymethyl)-2-[2,4,6-trihydroxy-3-(4-hydroxybenzoyl)phenyl]oxan-3-yl] 4-hydroxybenzoate	0.333317	529.133	1593.39	6268.48	217.743	[M+H]+	Postive	CIQDSZUZMUTHGY-UHFFFAOYNA-N	Organic oxygen compounds	Organooxygen compounds	Carbohydrates and carbohydrate conjugates	FALSE	529.13306:2243 530.13422:265 530.18726:206		913.071
2-Thiocytidine	0.32955	258.056	1214	6112.91	212.339	[M-H]-	Negative	RHFUOMFWUGWKKO-XVFCMESISA-N	Nucleosides, nucleotides, and analogues	Pyrimidine nucleosides		FALSE	258.05643:2589 258.1019:223 258.87061:495 259.97375:212 261.06949:238 261.14218:885 262.14481:259		889.766
Hexazinone	6.90222	253.167	1659.61	6109.99	212.238	[M+H]+	Postive	CAWXEEYDBZRFPE-UHFFFAOYSA-N	Organic nitrogen compounds	Organonitrogen compounds	Amines	FALSE	252.99316:245 253.12619:333 253.16649:4138 253.20203:947 254.16985:507 254.20509:215 255.03351:278 255.14343:377 255.18217:668 255.21793:618 255.25574:381 257.16028:711 257.19528:581 258.16068:403		979.615
Indoline	0.762733	120.081	2714.98	6078.4	211.14	[M+H]+	Postive	LPAGFVYQRIESJQ-UHFFFAOYSA-N	Organoheterocyclic compounds	Indoles and derivatives	Indolines	FALSE	119.98007:293 120.0302:1109 120.08086:2219 120.96877:507 121.02741:976 121.05087:7878 121.10046:620 121.96915:445 122.02695:286 122.05521:919 122.9633:5939 123.07993:480 123.1166:613 123.96555:236 124.96178:316 125.02357:232 125.05977:1256		968.1
1-Methyltryptophan	7.64368	217.098	1731.33	6023.41	209.23	[M-H]-	Negative	ZADWXFSZEAPBJS-JTQLQIEISA-N	Organoheterocyclic compounds	Indoles and derivatives	Indolyl carboxylic acids and derivatives	FALSE	216.85262:288 216.87379:226 217.09779:1689 217.88528:253 218.10338:333 218.82138:208 218.8512:311 218.8746:427 219.84535:4624 220.84698:444 220.86803:252 221.84248:3363 222.07715:361		975.98
Lauric isopropanolamide	6.96145	258.243	2293.51	5964.49	207.184	[M+H]+	Postive	MMBILEWCGWTAOV-UHFFFAOYSA-N	Lipids and lipid-like molecules	Fatty Acyls	Fatty amides	FALSE	258.17029:436 258.20609:304 258.24332:2433 259.17047:333 259.24423:252 260.22418:230 261.12982:418 261.17966:275 262.1431:711 263.15366:242 263.19702:420		965.858
[4,5-dihydroxy-3,4-bis(hydroxymethyl)-4a,8,8-trimethyl-5,6,7,8a-tetrahydro-1H-naphthalen-1-yl] octanoate	9.11672	395.278	3270.63	5954.4	206.833	[M+H]+	Postive	ROWCOMZNXJCEGO-UHFFFAOYNA-N	Lipids and lipid-like molecules	Fatty Acyls	Fatty acid esters	FALSE	395.21371:226 395.27759:3900 395.35632:555 396.27838:1060 397.33636:203 399.17725:1887 399.26801:275 400.1449:284 400.18008:481		925.88
MGDG 27:2	9.47367	679.442	2572.7	5905.58	205.137	[M+H]+	Postive	XUGCQRFTANGLKC-UVPRVFDASA-N				FALSE	679.44159:3399 680.4458:939 681.44244:786 682.80823:204		889.936
Mandelic acid	3.10197	151.04	1247.87	5881.81	204.312	[M-H]-	Negative	IWYDHOAUDWTVEP-ZETCQYMHSA-N	Benzenoids	Benzene and substituted derivatives		FALSE	150.86952:224 151.04034:1731 151.07628:280 151.87416:1168 152.002:233 153.84245:219 153.86868:23244 153.91425:442 153.96935:204 154.06247:310 154.86891:2731 154.92789:216 154.97398:1790 154.9968:438 155.86551:15491		966.882
DGTS 33:7	9.63997	712.515	2736.59	5848.82	203.165	[M+H]+	Postive	DRGYSIHOZVMNRM-GHRLSXTCSA-N	Lipids and lipid-like molecules	Glycerolipids	Triradylcglycerols	FALSE	712.51483:2447 713.34216:1225 713.51154:11918 714.34552:450 714.51447:4378 715.34711:423 715.51672:1197 716.34772:237 716.55182:481		998.953
plasmenyl-PE 33:2	8.86843	708.49	2678.78	5837.05	202.757	[M+H]+	Postive	AYUJKXIJCWGKJO-XHGJSYOLNA-N	Lipids and lipid-like molecules	Glycerophospholipids	Glycerophosphoethanolamines	FALSE	708.48969:2605 709.48865:955 710.49768:374 713.4458:876		854.997
NCGC00384828-01	6.88908	527.279	1448.74	5835.6	202.706	[M+H]+	Postive	LNZRIIIDRGIMHV-UHFFFAOYNA-N	Lipids and lipid-like molecules	Steroids and steroid derivatives		FALSE	527.2793:2786 528.28333:359 529.25793:219 529.28961:228		844.541
Eprosartan	6.8686	423.14	1970.94	5804.61	201.63	[M-H]-	Negative	OROAFUQRIXKEMV-LDADJPATSA-N	Benzenoids	Benzene and substituted derivatives	Benzoic acids and derivatives	FALSE	423.14008:2711 424.14175:799 425.17996:266		941.887
Flavone + 2O + 2MeO; PlaSMA ID-1669	6.48478	315.09	2297.7	5779.06	200.742	[M+Na]+	Postive	OWQLBLNRUZULFV-UHFFFAOYSA-N	Phenylpropanoids and polyketides	Flavonoids	O-methylated flavonoids	FALSE	315.09039:2172 315.24796:241 315.2872:270 316.05685:270 316.09183:663 316.25946:269 316.28323:331 318.1871:232 318.22681:332 318.27573:435 318.88849:257 319.13553:339 319.23135:235		877.633
N-acetyl putrescine	0.313233	131.118	1561.36	5749.13	199.703	[M+H]+	Postive	KLZGKIDSEJWEDW-UHFFFAOYSA-N	Organic acids and derivatives	Carboximidic acids and derivatives	Carboximidic acids	FALSE	130.93451:514 130.9801:230 131.00124:281 131.02992:237 131.08369:235 131.1183:1997 131.93031:5118 132.00301:385 132.08081:911 132.11465:249 132.97261:701 133.08105:364 133.13382:1036 133.92749:3349 133.9882:892 134.9707:327 135.02203:216 135.03705:317 135.06187:275 135.08182:432 135.11523:233 135.9272:289 136.02002:231 136.06245:2972		972.773
DGTS 35:7	11.4285	740.544	1814.37	5695.8	197.85	[M+H]+	Postive	IMQHCAVJRUNPAB-PCQFLFGDSA-N	Lipids and lipid-like molecules	Glycerolipids	Triradylcglycerols	FALSE	740.54395:1948 741.54828:830		886.795
2,4-dihydroxyheptadecyl acetate	9.57228	313.274	2895.46	5687.32	197.556	[M+H]+	Postive	ZBVKFVTUHVIICH-UHFFFAOYNA-N	Lipids and lipid-like molecules	Fatty Acyls	Fatty alcohols	FALSE	313.17212:251 313.2738:2704 314.27625:899 315.27548:309 318.24219:266		948.629
2-Aminophenol	2.14518	110.06	1644.1	5647.53	196.173	[M+H]+	Postive	CDAWCLOXVUBKRW-UHFFFAOYSA-N	Benzenoids	Benzene and substituted derivatives	Aniline and substituted anilines	FALSE	109.94296:798 110.00771:679 110.06004:1651 110.93926:237 111.01165:215 111.04417:617 111.0547:431 111.07967:743 111.9836:3154 112.00674:433 112.95555:437 112.96814:369 112.9882:456 113.05962:1118 113.94003:208 113.9634:2488 114.09086:1028 114.93397:211 114.98441:977 115.00578:344 115.03839:448		975.32
4alpha-deoxyphorbol 12-tiglate-13-isobutyrate (4-dPE A)	9.19993	523.265	2899.4	5625.9	195.422	[M+Na]+	Postive	LIKKXXHSQQGZKK-UHFFFAOYNA-N	Lipids and lipid-like molecules	Prenol lipids	Diterpenoids	FALSE	523.26514:3086 524.26697:858 524.29639:634 524.49933:307 525.26935:280		962.602
2,3,14-trihydroxy-10,13-dimethyl-17-(2,3,6,7-tetrahydroxy-5,6-dimethylheptan-2-yl)-2,3,4,5,9,11,12,15,16,17-decahydro-1H-cyclopenta[a]phenanthren-6-one	4.6986	511.327	2655.97	5609.71	194.86	[M+H]2+	Postive	GGLFMIALTLLMEJ-UHFFFAOYNA-N	Lipids and lipid-like molecules	Steroids and steroid derivatives	Bile acids, alcohols and derivatives	FALSE	511.32733:2595 511.39902:266 511.48987:251 511.82587:1254 512.32684:933 512.83246:266 513.80487:822 514.30609:445		956.391
Ginsenoside F3	9.15588	771.487	2181.22	5565.39	193.32	[M+Na]+	Postive	HJRVLGWTJSLQIG-TVOOLRDFSA-N	Lipids and lipid-like molecules	Prenol lipids	Triterpenoids	FALSE	771.4873:2734 772.49219:862 773.49658:470		949.765
Mefenamate	5.81127	241.998	2626.43	5552.95	192.888	[M+H]+	Postive	HYYBABOKPJLUIN-UHFFFAOYSA-N	Benzenoids	Benzene and substituted derivatives	Benzoic acids and derivatives	FALSE	241.99788:2819 242.1881:260 242.99155:4017 243.15903:547 243.19379:445 243.22879:226 243.99571:345 244.19133:644 244.98659:606 246.86142:259		850.197
2-acetoxy-6-pentadecylbenzoic acid	10.3672	413.266	2646.46	5547.43	192.696	[M+H]+	Postive	ZKWZWUUWZMUNAN-UHFFFAOYSA-N	Benzenoids	Benzene and substituted derivatives	Benzoic acids and derivatives	FALSE	413.26599:3259 414.2688:817 415.26901:356		970.652
2(5H)-Furanone, 5-hydroxy-4-[2-(octahydro-2,3-dihydroxy-5,6,8a-trimethylspiro[naphthalene-1(2H),2'-oxiran]-5-yl)ethyl]-	4.35343	384.238	2452.36	5540.11	192.442	[M+H]+	Postive	QMWJARHMJRTJMQ-UHFFFAOYNA-N	Organoheterocyclic compounds	Dihydrofurans	Furanones	FALSE	384.2377:2762 384.30756:223 384.37683:303 384.73636:478 385.26056:364 385.36328:259 387.3454:247		909.822
(2alpha,5alpha,9alpha,10beta,14beta)-2,5,9,10-Tetraacetoxytaxa-4(20),11-dien-14-yl 2-methylbutanoate	10.2744	643.291	3848.13	5532.94	192.193	[M+H]+	Postive	NDUFGVRVJKHNKE-UHFFFAOYNA-N	Lipids and lipid-like molecules	Prenol lipids	Diterpenoids	FALSE	643.29144:4085 644.29297:1195 645.29602:272		901.935
Metamitron	5.37375	203.091	1617.45	5525.73	191.943	[M+H]+	Postive	VHCNQEUWZYOAEV-UHFFFAOYSA-N	Organoheterocyclic compounds	Triazines	1,2,4-triazines	FALSE	203.09151:1882 203.12282:813 203.17999:281 204.91966:208 204.95277:280 205.00636:311 205.067:415 205.15549:218 206.91676:878 206.95273:273 207.06241:345 207.09845:307 207.13663:317 207.17247:592 207.98494:346 208.06268:308		926.475
DGDG 28:0	9.13527	854.582	2163.68	5516.09	191.608	[M+H]+	Postive	LICPZTXRKHWPLG-SZYANLINSA-N	Lipids and lipid-like molecules	Glycerolipids	Glycosylglycerols	FALSE	854.58154:2642 855.58905:1158 856.58466:450 859.53552:921		958.033
(1R,3aS,3bR,6aR,7aS,9R,11R,11aS,12aR,13aR,15aR)-3a,11,11a-Trihydroxy-9,15a-dimethyl-1-(5-oxo-2,5-dihydro-3-furanyl)icosahydro-7aH,13aH-cyclopenta[7,8]phenanthro[2,3-b]pyrano[3,2-e][1,4]dioxine-13a-carbaldehyde	9.54755	533.279	2744.03	5486.32	190.573	[M+H]+	Postive	OWPWFVVPBYFKBG-UHFFFAOYNA-N	Lipids and lipid-like molecules	Steroids and steroid derivatives	Steroid lactones	FALSE	533.27893:2719 533.84479:226 534.2832:1021 534.36957:705 535.28662:283 535.32892:415 535.36682:411 536.16693:384 537.15808:327 537.25061:222 537.53607:604 538.16254:245		873.158
Palmitoylcarnitine	9.3784	400.4	1844.02	5458.42	189.604	[M+H]+	Postive	XOMRRQXKHMYMOC-UHFFFAOYSA-O	Lipids and lipid-like molecules	Fatty Acyls	Fatty acid esters	FALSE	400.31302:213 400.39963:2552 401.26923:525 401.40018:517 403.23239:5178 404.23636:1523 404.3147:262 405.23477:207		965.402
Propylparaben	3.9416	179.071	1171.17	5236.22	181.886	[M-H]-	Negative	QELSKZZBTMNZEB-UHFFFAOYSA-N	Benzenoids	Benzene and substituted derivatives	Benzoic acids and derivatives	FALSE	178.83833:264 178.86507:286 178.95352:410 179.07146:1639 179.84172:7266 180.8604:314 181.08728:1221 181.83798:4073 182.98863:5694 183.60588:263 183.83279:738		958.613
Crotamiton	8.59822	204.139	2301.23	5227.31	181.577	[M+H]+	Postive	DNTGGZPQPQTDQF-XBXARRHUSA-N	Benzenoids	Benzene and substituted derivatives	Anilides	FALSE	204.13898:2731 204.95216:221 205.06415:314 205.08418:391 205.14519:400 206.91736:709 207.09908:213 207.13647:334 207.9877:384 208.13515:249 208.91164:256 209.11717:475		986.409
Phthalic acid	6.02117	167.033	1895.95	5220.39	181.336	[M+H]+	Postive	XNGIFLGASWRNHJ-UHFFFAOYSA-N	Benzenoids	Benzene and substituted derivatives	Benzoic acids and derivatives	FALSE	166.96651:248 167.01283:538 167.03333:1955 167.06856:669 167.10573:617 167.14221:304 167.99409:989 168.03612:324 168.08513:287 169.01099:228 169.08733:837 169.12355:1114 169.15732:211 169.98778:225 170.13123:225 171.03448:317 171.08202:246 171.10127:949 171.14845:2570		969.626
2-Amino-3-methoxybenzoic acid	0.342317	168.065	1185.16	5202.76	180.724	[M+H]+	Postive	SXOPCLUOUFQBJV-UHFFFAOYSA-N	Benzenoids	Benzene and substituted derivatives	Benzoic acids and derivatives	FALSE	167.9653:262 168.06491:2734 168.11327:1997 168.96825:328 169.01083:289 169.02847:411 169.09459:2928 169.12994:2387 169.59734:239 170.06569:14480 170.1138:559 170.13692:628 170.46213:202 170.56796:2906 170.95786:398 171.06393:1510 171.10736:438 171.13608:702 171.56827:242 171.97871:227 172.0616:274 172.09729:1915 172.95583:4942 173.04788:830		958.709
Thymidine	0.7592	241.085	1156.57	5196.76	180.515	[M-H]-	Negative	IQFYYKKMVGJFEH-XLPZGREQSA-N	Nucleosides, nucleotides, and analogues	Pyrimidine nucleosides	Pyrimidine 2'-deoxyribonucleosides	FALSE	240.86964:268 241.08487:1658 241.14874:266 243.81888:230		951.49
Caffeoyl lysine; PlaSMA ID-617	4.97752	307.125	1439.42	5159.64	179.226	[M-H]-	Negative	WVFMZTORJFNZPK-UHFFFAOYNA-N				FALSE	307.12527:1963 309.11954:598 309.20822:307 309.71982:232		912.114
Honokiol; PlaSMA ID-440	0.92085	265.124	1171.62	5095.16	176.986	[M-H]-	Negative	FVYXIJYOAGAUQK-UHFFFAOYSA-N	Benzenoids	Benzene and substituted derivatives	Biphenyls and derivatives	FALSE	265.12363:1547 265.88571:581 266.09335:394 266.11771:234		953.849
(2E,4E)-N-[2-(4-hydroxyphenyl)ethyl]dodeca-2,4-dienamide	7.84398	316.225	1910.93	5042.82	175.168	[M+NH4]+	Postive	VVRNYAJXAUQHEN-UHFFFAOYSA-N	Benzenoids	Phenols	1-hydroxy-2-unsubstituted benzenoids	FALSE	316.14035:397 316.15707:305 316.22543:1897 316.32324:580 316.93036:515 317.16541:260 317.22824:288 318.24121:843 318.27872:1689 318.92471:315 319.2291:339 319.28299:232 321.14749:521 321.19717:351		909.62
N-(2-Furoyl)glycine	4.21002	170.042	1943.04	5037.81	174.994	[M+H]+	Postive	KSPQDMRTZZYQLM-UHFFFAOYSA-N	Organic acids and derivatives	Carboxylic acids and derivatives	Amino acids, peptides, and analogues	FALSE	170.01994:1415 170.0424:1698 170.07869:308 170.12216:232 170.51974:322 170.54198:1070 171.06395:312 171.10014:652 171.14948:62965 171.51591:250 171.99245:264 172.11433:209 172.1528:6471 172.95663:597 173.00351:231 173.07831:3328 173.11861:457 173.15402:688 173.98096:339 174.05753:242 174.08006:767 174.95427:370 175.01805:17814		860.629
Flavone base + 3O, 2MeO, O-guaiacylglyceryl-Hex; PlaSMA ID-3176	0.333317	689.212	1358.55	4965.32	172.476	[M+H]+	Postive	WTKUHKWWAMSHEE-UHFFFAOYNA-N	Lignans, neolignans and related compounds	Lignan glycosides		FALSE	689.21155:1771 689.25146:735 690.21631:640 691.18481:3218 692.19012:695 693.19037:227		951.979
Cyclo-prolylglycine	0.311183	155.08	2788.95	4932.32	171.33	[M+H]+	Postive	OWOHLURDBZHNGG-YFKPBYRVSA-N	Organic acids and derivatives	Carboxylic acids and derivatives	Amino acids, peptides, and analogues	FALSE	154.96677:258 154.98148:243 155.08018:3901 155.10446:1972 155.12718:589 155.15329:268 155.96745:399 155.98935:230 156.08702:1442 156.9781:260 157.00606:283 157.08189:1109 157.09962:837 158.00244:11115 158.04904:287 158.97328:2000 159.00433:1075 159.019:679 159.10727:211 160.05396:1554		903.947
TG 48:11	11.1673	807.563	1631.09	4928.75	171.206	[M+H]+	Postive	MLMCIUPJMBNCRG-AEJAVUPNNA-N				FALSE	807.56262:2038 808.56433:1542 809.57709:289		822.991
Muramic acid	0.99915	250.094	1109.3	4898.34	170.15	[M-H]-	Negative	MSFSPUZXLOGKHJ-UHFFFAOYNA-N	Organic oxygen compounds	Organooxygen compounds	Carbohydrates and carbohydrate conjugates	FALSE	249.97781:307 250.09358:1552 251.09627:325 251.79465:310 252.93483:218 253.79402:460 253.82562:971		955.831
Abietic acid	9.36093	301.218	1133.81	4881.63	169.569	[M-H]-	Negative	RSWGJHLUYNHPMX-ONCXSQPRSA-N	Lipids and lipid-like molecules	Prenol lipids	Diterpenoids	FALSE	301.2178:1547		916.592
7,11-Methano-2H-cycloocta[3,4]benzo[1,2-c]pyran-8-acetic acid, 10-(benzoyloxy)-4-(3-furanyl)-1,4,4a,5,6,6a,7,8,9,10,11,12-dodecahydro-4a,7,9,9-tetramethyl-2,13-dioxo-, methyl ester, (4R,4aR,7R,8S,10R,11R)-	9.41703	575.258	1763.34	4855.2	168.651	[M+H]+	Postive	FFEDQMUTKXNOJV-UHFFFAOYNA-N	Lipids and lipid-like molecules	Prenol lipids	Triterpenoids	FALSE	575.25824:3325 575.37836:217 575.40656:251 575.51019:233 576.26245:1190 576.40527:215 577.26813:322		837.193
16-Glucuronide-estriol	8.39753	465.211	1534.83	4841.45	168.173	[M+H]+	Postive	FQYGGFDZJFIDPU-JRSYHJKYSA-N	Lipids and lipid-like molecules	Steroids and steroid derivatives	Steroidal glycosides	FALSE	465.16888:268 465.21103:1850 466.20996:275 467.20749:1329 467.40726:253 467.44537:282		940.369
Abiraterone (CB-7598)	9.20198	350.245	2704.76	4835.57	167.969	[M+Na]+	Postive	GZOSMCIZMLWJML-UHFFFAOYNA-N	Lipids and lipid-like molecules	Steroids and steroid derivatives	Androstane steroids	FALSE	350.17584:323 350.24527:4005 350.29846:323 351.24677:851 351.28381:309 351.32993:258 352.24753:1323 352.31644:339 353.1702:211 353.19171:348 353.24295:383 353.26022:253 353.30878:435		844.784
TG 57:4	9.84185	942.858	1818.25	4825.63	167.624	[M+H]+	Postive	JRFWGBCEMFPAHH-KEHLJCKENA-N	Lipids and lipid-like molecules	Glycerolipids	Triradylcglycerols	FALSE	942.85797:1720 943.86035:1013 944.85724:435		853.846
Kainic acid	3.82218	214.108	1986.18	4795.67	166.583	[M+H]+	Postive	VLSMHEGGTFMBBZ-OOZYFLPDSA-N	Organic acids and derivatives	Carboxylic acids and derivatives	Amino acids, peptides, and analogues	FALSE	214.10843:2253 214.14949:324 215.10721:488 215.12537:479 215.16953:342 215.40154:263 215.98871:211 216.04472:474 216.18147:380 217.01346:477 217.10536:659 217.14598:265 218.17612:259		960.64
lysoPC 15:1	2.64692	502.286	2820.59	4763.35	165.461	[M+H]+	Postive	SUCJIOBGMPMVBJ-PHWKBSFONA-N	Lipids and lipid-like molecules	Glycerophospholipids	Glycerophosphocholines	FALSE	502.28632:3509 503.28928:703 504.29639:353 505.45184:214		856.892
(1R,2R,5R,7R,10S,11S,14S,16S,19R,20R,23R,25R,28S,29S,32S,34S)-5,23-Diethyl-2,11,14,20,29,32-hexamethyl-4,13,22,31,37,38,39,40-octaoxapentacyclo[32.2.1.1~7,10~.1~16,19~.1~25,28~]tetracontane-3,12,21,30-tetrone	9.16	787.46	1871.63	4717.3	163.861	[M+H]+	Postive	ZBDGIMZKOJALMU-UHFFFAOYNA-N	Phenylpropanoids and polyketides	Macrolides and analogues		FALSE	787.45966:2217 788.4624:545 789.4549:392		871.282
N-[1-(4-methoxy-6-oxopyran-2-yl)-2-methylbutyl]acetamide	0.359583	271.165	1124.84	4712.9	163.708	[M+H]+	Postive	LFXMHSJWYXKODM-UHFFFAOYNA-N	Organoheterocyclic compounds	Pyrans	Pyranones and derivatives	FALSE	271.08215:316 271.16531:3656 271.22302:356 271.2626:293 271.6651:1157 271.75998:246 271.8667:304 272.12045:318 272.17111:1684 272.23395:742 272.63889:271 272.6662:483 273.06784:208 273.18106:28428 273.66681:1148 273.81818:407 274.18417:4275 274.27414:1087 274.67401:390 275.02072:235 275.12326:1330 275.18027:889 275.621:242 275.67606:1095 276.0506:257 276.0961:250 276.14291:408		888.896
MLS002639189-01	7.37072	253.227	1764.9	4711.81	163.67	[M+H]+	Postive	SVZORQBLCFZGBK-UHFFFAOYSA-N	Organic acids and derivatives	Organic carbonic acids and derivatives	Ureas	FALSE	252.99936:230 253.17831:402 253.22728:1594 254.22118:273 255.12354:380 255.19424:868 255.23222:259 255.93726:267 256.22845:230 256.2623:353 257.17154:1097 257.21262:332 257.24957:277		892.478
1-hydroxypyrene	5.6349	219.078	1970.93	4699.14	163.23	[M+H]+	Postive	BIJNHUAPTJVVNQ-UHFFFAOYSA-N	Benzenoids	Pyrenes		FALSE	219.0779:2103 219.13426:405 219.17503:55066 219.58418:213 220.08035:322 220.17795:8194 221.07791:270 221.11574:328 221.15163:547 221.18085:480 222.11276:2243 222.14978:465 222.18787:248 222.96266:974 223.06404:269 223.09592:382 223.12935:372 223.16806:566 223.99254:258		868.51
3aH-Cyclopenta[a]chrysene-3a-carboxylic acid, 1-acetyleicosahydro-9-hydroxy-5a,5b,8,8,11a-pentamethyl-, (1R,3aS,5aR,5bR,9S,11aR)-	5.43658	459.345	1643.97	4657.08	161.769	[M+H]+	Postive	RVMPLOSJMIQORE-UHFFFAOYNA-N	Lipids and lipid-like molecules	Steroids and steroid derivatives	Oxosteroids	FALSE	459.06232:485 459.34464:1646 460.35168:620 461.1459:376 461.32324:381 461.35071:342 462.14612:269 463.14026:5761 464.14313:2068		902.769
MGDG 28:6	9.5916	685.397	1895.69	4654.65	161.685	[M+H]+	Postive	GSVYWQLJHDYXFJ-FMOFOSCHSA-N				FALSE	685.39661:3295 686.40039:1414 687.39777:298		910.651
4-(beta-D-Glucopyranosyloxy)benzyl 2,3-dihydroxy-3-methylbutanoate	7.03022	425.136	1968.85	4562.94	158.499	[M+H]+	Postive	CHRIGVPNNGMWMG-UHFFFAOYNA-N	Organic oxygen compounds	Organooxygen compounds	Carbohydrates and carbohydrate conjugates	FALSE	425.13608:2285 425.3671:317 425.39178:222 426.13635:397 426.2486:267 426.39789:207 428.36978:221 429.35873:220		824.563
[3-methyl-1-[3-methyl-1-oxo-1-(2,3,4,5,6-pentahydroxyhexoxy)pentan-2-yl]oxy-1-oxopentan-2-yl] 2-hydroxy-3-methylpentanoate	6.38742	542.316	1446	4548.31	157.991	[M+H]+	Postive	UCAFTLMODRRASO-UHFFFAOYNA-N	Organic acids and derivatives	Peptidomimetics	Depsipeptides	FALSE	542.31586:1494 542.90808:303 543.32556:522 543.9129:207 544.90143:595 545.89954:251		942.63
Leupeptin Pr-LL	9.66828	441.318	1543.37	4541.02	157.738	[M+H]+	Postive	BFUKWVVFVGUARP-UHFFFAOYNA-N	Organic acids and derivatives	Carboxylic acids and derivatives	Amino acids, peptides, and analogues	FALSE	441.31845:2560 442.31848:684 443.29214:234 443.33078:249 444.30667:516 445.32797:226		975.266
PS 28:1	7.61652	678.435	1467.09	4514.74	156.825	[M+H]+	Postive	BLDXJICCRAUAFE-GXRFXBSFNA-N				FALSE	678.43518:1440 679.4425:612		947.872
20-Hydroxy	7.47053	351.216	1870.27	4483.7	155.747	[M-H]-	Negative	PTJFJXLGRSTECQ-PSPARDEHSA-N	Lipids and lipid-like molecules	Fatty Acyls	Eicosanoids	FALSE	351.2164:1964 352.22177:506 353.22174:208		927.758
4-[2-[[2,3-dihydroxy-2-(1-hydroxyethyl)butanoyl]oxymethyl]anilino]-4-oxobutanoic acid	7.03228	387.178	1841.48	4463.59	155.048	[M+H]+	Postive	DNDACVRMGDHDQY-UHFFFAOYNA-N	Benzenoids	Benzene and substituted derivatives	Benzyloxycarbonyls	FALSE	387.1777:2470 387.26999:239 388.18463:348 388.2966:213 389.18677:271 389.21204:236 390.30179:313 391.20627:265		909.169
Camptothecin	6.28488	347.105	1460.28	4456.11	154.788	[M-H]-	Negative	VSJKWCGYPAHWDS-UHFFFAOYSA-N	Alkaloids and derivatives	Camptothecins		FALSE	346.871:1414 347.10471:1887 348.86923:776 348.89374:520		891.424
Bisucaberin	2.19205	401.241	1260.04	4445.44	154.417	[M+H]+	Postive	GTADQMQBQBOJIO-UHFFFAOYSA-N	Phenylpropanoids and polyketides	Macrolactams		FALSE	401.24078:1366 401.28452:422 403.13403:261 405.25803:204		906.502
Sebacic acid	4.78278	201.113	1322.98	4434.78	154.047	[M-H]-	Negative	CXMXRPHRNRROMY-UHFFFAOYSA-N	Lipids and lipid-like molecules	Fatty Acyls	Fatty acids and conjugates	FALSE	200.80499:811 201.11246:1923 201.8018:10782 202.11505:460 202.80165:347 202.82556:253 203.79921:909 205.86453:463 206.0811:260		951.29
MGDG 28:8	5.19268	676.409	1976.02	4419.93	153.531	[M+H]+	Postive	YCYWAUZGNMJDJF-WGPAIVFXSA-N				FALSE	676.40875:2174 677.41211:589 681.36591:643		876.585
C13H18O2; PlaSMA ID-710	5.7657	207.136	1554.86	4413.42	153.305	[M+H]+	Postive					FALSE	206.91545:1034 207.06084:280 207.13605:1688 207.17398:887 207.98853:436 209.07884:310 209.11653:366 209.15144:706 209.19971:960 209.94403:277 210.1869:358 210.9081:324 210.98822:264 211.09457:478 211.1313:778 211.16887:864 211.43515:204		918.698
Powmil	6.57417	268.155	1371.43	4410.8	153.214	[M+H]+	Postive	LNJNFVJKDJYTEU-UHFFFAOYSA-N	Benzenoids	Benzene and substituted derivatives	Phenylcarbamic acid esters	FALSE	267.90649:231 267.94476:239 268.15543:1205 268.18997:280 268.23169:292 268.27103:299 269.13672:263 269.16769:654 269.21347:683 269.24594:537 270.21069:263 270.25104:251 270.94705:726 271.18964:664 271.21597:320 271.26126:367 271.94589:214 272.2265:250 272.25342:212 272.94193:511 273.10501:299		915.023
3-Buten-2-one, 4-[4-(beta-D-glucopyranosyloxy)-2-hydroxy-2,6,6-trimethylcyclohexylidene]-	3.15332	409.182	3035.35	4367.16	151.698	[M+H]+	Postive	OSUSRWMGHUUXBY-UHFFFAOYNA-N	Lipids and lipid-like molecules	Prenol lipids	Terpene glycosides	FALSE	409.18225:2840 409.33124:393 409.4014:386 410.1879:784 410.33237:220 410.36905:247 410.77756:238 410.88315:273 411.18243:398 411.34058:238 411.95187:249 412.8692:221 413.31671:206		937.365
3-hexadecyl-4-methoxy-5-methyloxolan-2-one	8.82852	372.347	2027.13	4357.68	151.369	[M+H]+	Postive	DJNFXUFERDZHCD-UHFFFAOYNA-N	Organoheterocyclic compounds	Lactones	Gamma butyrolactones	FALSE	372.34695:2198 372.90652:277 373.34967:524 374.28864:212 374.33081:317 374.34909:225 375.24899:351 377.26486:256 377.30783:461 377.33945:548		983.809
Cyclopamine	9.53725	412.296	1783.04	4336.4	150.63	[M+H]+	Postive	QASFUMOKHFSJGL-LAFRSMQTSA-N	Lipids and lipid-like molecules	Steroids and steroid derivatives	Steroidal alkaloids	FALSE	412.29633:1996 413.30219:543 413.32962:481 414.29266:438 414.31833:249 415.28217:1896 416.28903:794		906.304
2-Deoxyribose	7.26485	135.08	1755.77	4334.84	150.575	[M+H]+	Postive	ASJSAQIRZKANQN-CRCLSJGQSA-N	Organic oxygen compounds	Organooxygen compounds	Carbonyl compounds	FALSE	135.02177:332 135.04138:310 135.08005:2210 135.1154:237 137.05824:711 137.09532:412 137.12764:208 137.96468:623 138.96436:340 139.04533:565 139.07431:370 139.11206:372 139.96318:1009 140.06758:774		972.795
2-Hydroxy-13,20-dimethoxy-4,7,17,22,22-pentamethyl-11-oxo-5,10,21,23-tetraoxahexacyclo[18.2.1.0~1,17~.0~4,16~.0~6,14~.0~8,12~]tricosa-6(14),7,12-trien-18-yl acetate	5.43863	533.237	1960.6	4330.76	150.434	[M+H]+	Postive	WDGSJYYXVXQQHP-UHFFFAOYNA-N	Organoheterocyclic compounds	Benzopyrans	1-benzopyrans	FALSE	533.23682:2260 533.48999:202 533.52362:264 534.24152:949 535.23218:551 535.41852:16238 535.50232:422 536.2345:368 536.42261:3843 537.4256:916 537.5177:243		929.076
S4:17(P3:15/F1:2); PlaSMA ID-3138	9.6006	654.335	1757.85	4318.35	150.003	[M+NH4]+	Postive	AKPIJPQIDBGCGR-UHFFFAOYNA-N				FALSE	654.33484:2423 655.33606:1244 656.42578:202 657.4364:239 658.5061:329 659.2901:6232		937.248
4H-Pyran-4-one, 3-(beta-D-glucopyranosyloxy)-2-methyl-	6.02117	311.072	1552.83	4311.61	149.769	[M+H]+	Postive	YGSIRXHFAUFUEJ-UHFFFAOYNA-N	Organic oxygen compounds	Organooxygen compounds	Carbohydrates and carbohydrate conjugates	FALSE	311.07166:1547 311.18463:390 311.25558:528 311.29016:402 313.16464:565 313.19858:788 313.2345:229 313.27112:296 314.26996:237		862.055
(Z)-3-Hydroxyhexadec-7-enoic acid (NMR)	9.31645	269.212	1330.45	4302.83	149.464	[M-H]-	Negative	CBHANIXDPMXBGZ-KTKRTIGZNA-N	Lipids and lipid-like molecules	Fatty Acyls	Fatty acids and conjugates	FALSE	269.21155:2077 270.79507:394 271.16422:320 271.22327:290 272.79102:247 273.04636:305		923.835
4'-Methoxy-7-O-(6''-acetyl)-??-D-glucopyranosyl-8,3'-dihydroxyflavanone	4.21002	507.149	2927.32	4298.67	149.319	[M+H]+	Postive	BQZBPAFALHFIMA-UHFFFAOYNA-N	Phenylpropanoids and polyketides	Flavonoids	Flavonoid glycosides	FALSE	507.1492:3153 507.26929:257 507.43378:289 508.15271:1060 509.15634:243		966.545
3-Methylxanthine	9.05842	165.04	1447.62	4283.83	148.804	[M-H]-	Negative	GMSNIKWWOQHZGF-UHFFFAOYSA-N	Organoheterocyclic compounds	Imidazopyrimidines	Purines and purine derivatives	FALSE	164.83484:1989 164.92871:482 165.04001:2582 165.90521:207 165.97864:2647 166.01622:221 166.04573:351 166.83301:379 167.83667:788 167.97314:262 168.83577:235 168.99159:216 169.8335:1187 169.8763:223		849.43
Diethylstilbestrol (Stilbestrol)	7.44978	269.155	2132.78	4162.04	144.573	[M+H]+	Postive	RGLYKWWBQGJZGM-ISLYRVAYSA-N	Phenylpropanoids and polyketides	Stilbenes		FALSE	269.15491:2288 269.20767:451 269.24481:589 270.15735:450 270.94537:881 271.15817:317 271.18765:371 272.22592:493 272.94403:782 273.16534:558 273.95078:242		943.073
N4-Acetylsulfadimethoxine	0.333317	353.09	1070.3	4122.95	143.215	[M+H]+	Postive	DQWIIKBKAIPUPY-UHFFFAOYSA-N	Benzenoids	Benzene and substituted derivatives	Benzenesulfonamides	FALSE	353.09027:1944 353.21799:226 353.26709:213 353.30618:1013 353.34177:352 353.5936:242 353.9754:207 354.09052:379 355.1763:237 355.24344:235 355.32132:293 356.43533:271		941.482
MGDG 40:6	9.01552	848.629	1447.8	4111.25	142.809	[M+H]+	Postive	RFAQTMPYWRJLNB-OUGMFNJDSA-N				FALSE	848.51263:1162 848.62866:1485 849.52386:222 849.62793:579 850.63385:215 853.47052:456 853.58301:1268		914.331
2-amino-3-[4-hydroxy-3-(3-methylbut-2-enyl)phenyl]propanoic acid	4.33207	250.144	1851.04	4102.43	142.503	[M+H]+	Postive	UFFPHPAGEHMRFF-UHFFFAOYNA-N	Organic acids and derivatives	Carboxylic acids and derivatives	Amino acids, peptides, and analogues	FALSE	249.94096:287 250.14412:1958 250.95563:644 251.09212:234 251.14899:585 251.19948:504 252.98608:221 253.10301:210 253.17754:1018 253.21497:682 253.95546:233 254.11418:271 255.04616:893		944.217
Ranolazine	1.8701	428.251	1081.75	4080.82	141.752	[M+H]+	Postive	XKLMZUWKNUAPSZ-UHFFFAOYSA-N	Benzenoids	Phenol ethers	Anisoles	FALSE	428.25067:1578 428.37125:205 429.254:432 430.30154:253		930.245
1,4-dihydroxyheptadec-16-en-2-yl acetate	4.40702	329.267	1764.19	4011.92	139.359	[M+H]+	Postive	LUIGTZGBXWZJAX-UHFFFAOYNA-N	Lipids and lipid-like molecules	Fatty Acyls	Fatty alcohols	FALSE	329.18329:280 329.26694:1839 330.18768:211 330.26971:576 331.20566:432 331.25394:211 332.20654:355 333.27533:250		896.964
C25H36O4	9.31145	401.265	1942.46	4011.23	139.335	[M+H]+	Postive	OEUWSFOOMITSHN-UHFFFAOYNA-N	Lipids and lipid-like molecules	Steroids and steroid derivatives	Steroid acids	FALSE	401.26511:2258 401.30789:386 401.40002:225 402.27164:563 405.29785:316		912.211
Cezomycin	4.01583	495.246	1691.47	4006.07	139.155	[M+H]+	Postive	SFAOBXUZYBPOKX-UHFFFAOYNA-N	Organoheterocyclic compounds	Benzoxazoles		FALSE	495.24576:1803 495.43588:211 496.24524:885 496.43265:245 497.34927:264 498.41525:327		867.263
C22H25NO6; PlaSMA ID-2189	9.09198	400.181	1825.73	3975.26	138.085	[M+H]+	Postive					FALSE	400.18109:2010 401.18344:1239 401.38199:260 403.23422:256 404.2558:923		848.315
11BETA,17ALPHA,21-TRIHYDROXY-4-PREGNENE-3,20-DIONE 21-CAPRYLATE	9.28725	489.318	1410.83	3914.74	135.983	[M+H]+	Postive	VWVPRYMOFYIOOZ-UHFFFAOYNA-N	Lipids and lipid-like molecules	Steroids and steroid derivatives	Pregnane steroids	FALSE	489.03806:707 489.21417:2353 489.31839:1351 490.21759:489 490.32071:531 491.21213:1471 491.31335:587 492.21436:203 492.88278:220 493.21588:395 493.3959:262 493.85886:232		915.738
(E)-3-[3-methoxy-4-[1-(3,4,5-trimethoxyphenyl)propan-2-yloxy]phenyl]prop-2-en-1-ol	4.35343	406.22	1740.34	3823.85	132.826	[M+Na]+	Postive	CZVGIALASULOAU-UHFFFAOYNA-N	Phenylpropanoids and polyketides	Cinnamyl alcohols		FALSE	406.22031:2016 406.71985:629 407.21674:364 407.24069:464 407.2814:263 407.3537:274 407.38849:366 408.17117:328 408.28043:217 408.38748:312 409.17926:500 409.36557:404 411.19009:461 411.21225:302		941.006
MGDG 28:2	9.64615	693.455	1501.32	3821.09	132.73	[M+H]+	Postive	SYZKCOWNJTZFCS-OIEPISGOSA-N				FALSE	693.45496:2435 694.45782:735 695.4519:404 697.3728:837 697.44086:208 698.38025:488		921.706
Propranolol	6.15253	260.163	1423.4	3817.77	132.615	[M+H]+	Postive	AQHHHDLHHXJYJD-UHFFFAOYSA-N	Benzenoids	Naphthalenes		FALSE	260.16339:1958 261.10983:252 261.13165:816 261.16672:420 263.13562:262 263.26901:222 264.19113:374 264.23288:18419 265.13577:683		956.878
Esmolol	3.96767	296.183	1683.69	3813.74	132.475	[M+H]+	Postive	AQNDDEOPVVGCPG-UHFFFAOYSA-N	Benzenoids	Phenol ethers		FALSE	296.18332:1830 296.22702:394 296.6871:1047 296.71936:214 297.20782:402 297.24106:932 297.27866:867 298.1662:225 299.14908:257 299.18594:335 299.21927:363 299.2572:329 300.16006:346 300.19214:212 300.25308:253 300.90793:371 300.93521:219		860.407
Furostane base -2H + O-Hex; PlaSMA ID-2919	9.279	577.371	1641.78	3783.75	131.433	[M+H]+	Postive	DFVRTHJUFCVHTR-UHFFFAOYNA-N	Lipids and lipid-like molecules	Steroids and steroid derivatives	Steroidal glycosides	FALSE	577.08655:379 577.2038:890 577.37109:1481 577.49951:238 578.19208:487 578.37305:444 579.19873:281 579.30566:237 579.37164:307 581.00507:538 582.33813:233 582.36761:242		874.927
C11H18N2O5S2; PlaSMA ID-1717	6.34107	323.072	1365.5	3767.48	130.868	[M+NH4]+	Postive					FALSE	323.07242:2008 323.17667:322 323.20877:4114 323.25369:674 324.07443:404 324.15005:204 324.21356:486 324.88422:279 325.02594:337 325.07224:364 325.20343:525 325.23465:607 325.27158:423 325.31049:352 325.9176:226 326.17975:237 326.31351:547 326.38724:209 326.63989:257 327.24478:264 327.29068:456		848.873
methyl 2,4,10-triacetyloxy-5,9-dihydroxy-1,4a-dimethyl-7-propan-2-yl-2,3,4,9,10,10a-hexahydrophenanthrene-1-carboxylate	8.33983	503.229	2198.87	3760.61	130.629	[M+H]+	Postive	CDYGRHOHQUXDMN-UHFFFAOYNA-N	Lipids and lipid-like molecules	Steroids and steroid derivatives	Hydroxysteroids	FALSE	503.05261:244 503.2291:2457 504.23401:583 505.04703:360 505.22934:1171 506.22809:477		826.062
2-Penten-1-ol, 5-[(1S,4aS,8aS)-decahydro-5,5,8a-trimethyl-2-methylene-1-naphthalenyl]-3-methyl-, (2E)-	9.97528	332.293	2158.12	3755.51	130.452	[M+Na]+	Postive	NERNKRPBSOBEHC-UHFFFAOYNA-N	Lipids and lipid-like molecules	Prenol lipids	Diterpenoids	FALSE	332.29276:2545 333.20331:268 333.2916:720 334.3096:887 337.25214:288		835.746
4-hydroxy-3,3,5-trimethyl-4-[(E)-3-[3,4,5-trihydroxy-6-(hydroxymethyl)oxan-2-yl]oxybut-1-enyl]cyclohexan-1-one	4.43045	406.25	1629.09	3745.4	130.101	[M+H]+	Postive	QFTPTUOKFIIFJH-UHFFFAOYNA-N	Lipids and lipid-like molecules	Fatty Acyls	Fatty acyl glycosides	FALSE	406.24951:1920 406.758:302 407.19809:361 407.25687:308 407.35178:232 407.38507:331 409.164:261 409.29099:259 409.38699:469		805.973
Propyl 2-O-beta-D-xylopyranosyl-beta-D-glucopyranoside	3.94142	377.143	1359.41	3742.55	130.002	[M+H]+	Postive	YBKPQAJLYSMOBM-UHFFFAOYNA-N	Organic oxygen compounds	Organooxygen compounds	Carbohydrates and carbohydrate conjugates	FALSE	377.14331:1978 377.30142:275 379.31958:520 379.34906:317 380.28766:226 380.33105:214 381.22513:213 381.29898:462 381.3316:397 381.36874:246		890.256
(2S)-2-(2-hydroxypropan-2-yl)-9-[(2S,3R,4S,5S,6R)-3,4,5-trihydroxy-6-(hydroxymethyl)oxan-2-yl]oxy-2,3-dihydrofuro[3,2-g]chromen-7-one	7.61652	442.171	1496.28	3721.11	129.257	[M+Na]+	Postive	JWWFVRMFYKPZNE-UHFFFAOYNA-N	Phenylpropanoids and polyketides	Coumarins and derivatives	Coumarin glycosides	FALSE	442.17117:1777 442.37079:391 442.67319:576 443.42358:207 443.67221:236 446.25333:18302 447.09283:265		908.092
Reserpic acid; PlaSMA ID-2195	6.09277	401.215	1557	3694.54	128.334	[M+H]+	Postive	JVHNBFFHWQQPLL-UHFFFAOYNA-N	Alkaloids and derivatives	Corynanthean-type alkaloids		FALSE	401.07935:275 401.21497:1875 402.21747:423 404.24673:222 405.33392:349		832.368
5-(1,2,4a,5-tetramethyl-7-oxo-3,4,8,8a-tetrahydro-2H-naphthalen-1-yl)-3-methylpentanoic acid	7.39827	338.269	1527.4	3693.16	128.286	[M+Na]+	Postive	RNWHJFUXZQBBLK-UHFFFAOYNA-N	Lipids and lipid-like molecules	Prenol lipids	Diterpenoids	FALSE	338.16711:514 338.22034:241 338.26871:1734 338.34152:1959 339.15906:238 339.26971:254 339.32419:468 339.34262:618 340.12244:205 341.23517:352 341.30139:294 342.27005:313 343.24704:354		962.796
Raffinose	7.61652	505.182	1038.55	3635.62	126.287	[M+H]+	Postive	MUPFEKGTMRGPLJ-UHFFFAOYNA-N	Organic oxygen compounds	Organooxygen compounds	Carbohydrates and carbohydrate conjugates	FALSE	505.10907:379 505.18176:1340 505.32703:212 506.112:464 506.18115:242 507.1069:618 507.15942:736 507.40231:211 507.47739:228 507.51166:332 508.16025:252 509.19867:259 509.25833:216 509.57996:207 510.13821:499		833.143
Salicin	3.45335	287.114	1627.41	3631.06	126.129	[M+H]+	Postive	NGFMICBWJRZIBI-UHFFFAOYNA-N	Organic oxygen compounds	Organooxygen compounds	Carbohydrates and carbohydrate conjugates	FALSE	287.11423:1818 287.18372:283 288.12534:295 288.21466:218 288.93121:235 289.12671:209 289.18289:245 290.07547:292 290.25748:245 291.15802:211		884.508
Irbesartan	10.3672	429.238	1572.57	3593.88	124.838	[M+H]+	Postive	YOSHYTLCDANDAN-UHFFFAOYSA-N	Benzenoids	Benzene and substituted derivatives	Biphenyls and derivatives	FALSE	429.23846:2014 430.24243:286 430.91278:1446 431.2435:352 431.33017:209 432.39252:232 433.29446:337 433.37332:228		902.102
5(S)-5-carboxystrictosidine; PlaSMA ID-2904	0.250417	575.23	1480.19	3564.24	123.808	[M+H]+	Postive	LHKZIVMTXZLOTP-UHFFFAOYNA-N	Lipids and lipid-like molecules	Prenol lipids	Terpene glycosides	FALSE	574.74127:714 575.18146:200 575.23029:1778 575.72668:996 576.22607:418 577.5575:213 577.59058:211 579.51288:292		845.769
C19H24N2O; PlaSMA ID-1535	8.50135	297.197	2529.75	3560.43	123.676	[M+H]+	Postive					FALSE	297.16602:245 297.19678:2382 297.24008:344 298.1355:234 298.2002:465 298.23618:206 298.28491:208 298.87863:259 299.18411:714 299.2168:392 299.25226:229 300.18204:257 301.07318:272		988.069
beta-D-Glucopyranoside, 3-hydroxy-2-(4-hydroxy-3-methoxyphenyl)propyl	5.88905	361.147	1392.57	3523.95	122.408	[M+H]+	Postive	REHZVRNVHQFBAF-UHFFFAOYNA-N	Organic oxygen compounds	Organooxygen compounds	Carbohydrates and carbohydrate conjugates	FALSE	361.14713:1403 361.27322:376 362.24115:563 365.19208:218 365.2341:222 365.26724:434 365.30338:438 365.34283:400		834.314
beta-D-Glucopyranoside, 4-[(1R,3aR,4S,6aS)-6a-(acetyloxy)tetrahydro-4-(4-hydroxy-3-methoxyphenyl)-1H,3H-furo[3,4-c]furan-1-yl]-2-methoxyphenyl	0.250417	596.237	1688.69	3520.03	122.272	[M+H]+	Postive	ARPKCZZZMDEOIF-UHFFFAOYNA-N	Lignans, neolignans and related compounds	Lignan glycosides		FALSE	595.74438:567 596.23694:2337 596.74194:1118 600.44189:257		816.806
3',4,5',6-tetrahydroxy-2',8'-bis(4-hydroxyphenyl)-5-[3,4,5-trihydroxy-6-(hydroxymethyl)oxan-2-yl]spiro[1-benzofuran-2,9'-2,3,4,8-tetrahydrofuro[2,3-h]chromene]-3-one	0.3153	705.183	1228.61	3518.74	122.227	[M+H]+	Postive	MYIUHDZRMLFLNJ-UHFFFAOYNA-N	Phenylpropanoids and polyketides	2-arylbenzofuran flavonoids		FALSE	705.18286:1372 706.19556:502 707.18567:299 707.26959:490 708.26721:261		812.174
Lauric isopropanolamide	8.7095	258.241	1658.8	3506.92	121.817	[M+H]+	Postive	MMBILEWCGWTAOV-UHFFFAOYNA-N	Lipids and lipid-like molecules	Fatty Acyls	Fatty amides	FALSE	258.13364:291 258.20642:286 258.24115:1808 261.12979:913 263.15814:627 263.19974:250		884.565
Hapalindole D	4.07918	337.171	1774.81	3488.8	121.187	[M+H]+	Postive	PPHWDUZMWNUINO-UHFFFAOYNA-N	Lipids and lipid-like molecules	Prenol lipids	Monoterpenoids	FALSE	337.10309:342 337.17123:2086 337.23398:341 337.26965:572 337.30771:542 337.34357:215 337.70169:13490 338.20145:3070 338.34171:2100 338.70258:1525 339.0564:238 339.21359:231 339.25107:485 339.29065:578 339.34204:585 340.17957:3098 340.25824:1009 340.67966:654 341.18362:607		874.086
PS 41:6	4.50335	872.542	1607.04	3483.94	121.019	[M+H]+	Postive	JVSBLMCKZPVXTL-QFHIGHBWNA-N				FALSE	872.54187:1949 873.54126:986 874.54645:419 877.49609:265		962.686
Bortezomib (Velcade)	3.21515	407.187	1631.75	3474.18	120.68	[M+Na]+	Postive	GXJABQQUPOEUTA-UHFFFAOYNA-N	Organic acids and derivatives	Carboxylic acids and derivatives	Amino acids, peptides, and analogues	FALSE	407.18698:1967 407.31064:369 407.3537:583 409.16046:263 409.25482:210 409.36093:538 410.37256:247 411.20511:205 411.35608:409 412.16473:287		909.174
(2S)-N-[(2E,4E,6S,7R)-7-{(2S,3S,4R,5R)-3,4-Dihydroxy-5-[(1E,3E,5E)-7-(4-hydroxy-1-methyl-2-oxo-1,2-dihydro-3-pyridinyl)-6-methyl-7-oxo-1,3,5-heptatrien-1-yl]tetrahydro-2-furanyl}-6-methoxy-5-methyl-2,4-octadien-1-yl]-2-{(2R,3R,4R,6S)-2,3,4-trihydroxy-5,5-dimethyl-6-[(1E,3E)-1,3-pentadien-1-yl]tetrahydro-2H-pyran-2-yl}butanamide	7.5688	833.418	1140.34	3471.25	120.578	[M+Na]+	Postive	NTAHMPNXQOYXSX-UHFFFAOYNA-N	Organic oxygen compounds	Organooxygen compounds	Carbohydrates and carbohydrate conjugates	FALSE	833.41809:2031 834.42206:792		903.891
methyl (1S,3R,4R,5R)-3-[(E)-3-(3,4-dihydroxyphenyl)prop-2-enoyl]oxy-1,4,5-trihydroxycyclohexane-1-carboxylate	4.41113	386.146	1574.99	3458.06	120.12	[M+H]+	Postive	MZNIJRAPCCELQX-UHFFFAOYNA-N	Organic oxygen compounds	Organooxygen compounds	Alcohols and polyols	FALSE	386.14618:2038 386.36496:223 387.14447:433 387.1698:229		871.159
Sinapoylcholine	4.15545	310.162	1295.97	3448.62	119.792	[M+H]+	Postive	HUJXHFRXWWGYQH-UHFFFAOYSA-O	Phenylpropanoids and polyketides	Cinnamic acids and derivatives	Hydroxycinnamic acids and derivatives	FALSE	310.16245:1428 310.20663:238 311.14432:237 311.17654:257 311.22217:230 311.25772:788 311.29218:368 313.27292:392 314.19955:286 314.40942:208 315.13696:211		859.491
Hexopyranoside, 3,4-dimethoxyphenyl 6-O-(6-deoxy-alpha-L-mannopyranosyl)-	5.47032	485.16	1581.4	3441.76	119.553	[M+Na]+	Postive	ALPIUWBZQOROIJ-UHFFFAOYNA-N	Organic oxygen compounds	Organooxygen compounds	Carbohydrates and carbohydrate conjugates	FALSE	485.16028:1749 486.16068:410 487.15942:200		936.532
17ALPHA-HYDROXYPROGESTERONE CAPROATE630-56-8	9.72003	429.297	1929.96	3432.5	119.232	[M+H]+	Postive	DOMWKUIIPQCAJU-UHFFFAOYNA-N	Lipids and lipid-like molecules	Steroids and steroid derivatives	Pregnane steroids	FALSE	429.29724:2690 430.30139:412 430.91245:995 431.29956:441 433.28571:249		875.314
Eriodictyol 7,3'-dimethyl ether	5.97973	317.103	1271.09	3412.65	118.542	[M+H]+	Postive	QZJVBGCZOLNWHW-UHFFFAOYNA-N	Phenylpropanoids and polyketides	Flavonoids	O-methylated flavonoids	FALSE	317.10306:1249 318.10916:275 318.22427:377 319.09222:222 319.13037:295 319.18839:385 319.2518:256 321.20486:361 321.24158:576 321.27911:448		953.907
C27H30O14; PlaSMA ID-2931	6.37427	579.163	1291.53	3412.26	118.529	[M+H]+	Postive					FALSE	579.1629:2437 579.58752:270 580.16785:906 580.56433:269		840.928
Subsessiline; PlaSMA ID-3209	4.16857	717.365	1315.49	3383.58	117.533	[M+H]+	Postive	RZBFPDQKWUWUCK-UHFFFAOYNA-N	Alkaloids and derivatives	Aspidospermatan-type alkaloids		FALSE	717.36505:1629 718.36249:260 719.36865:294		918.753
[(2R,3S,4S,5R,6S)-3,4,5-trihydroxy-6-[2-hydroxy-4,4,6,6-tetramethyl-2-(2-methylprop-1-enyl)-3,5-dioxocyclohexyl]oxyoxan-2-yl]methyl 3,4,5-trihydroxybenzoate	0.311183	586.245	1131.23	3363.56	116.837	[M+H]+	Postive	ZOEFIRUNMVHSJA-UHFFFAOYNA-N	Benzenoids	Benzene and substituted derivatives	Benzoic acids and derivatives	FALSE	586.24493:1248 587.24103:246		842.048
2-Aminoheptane	9.6773	116.143	1245.92	3350.32	116.377	[M+H]+	Postive	VSRBKQFNFZQRBM-UHFFFAOYSA-N	Organic nitrogen compounds	Organonitrogen compounds	Amines	FALSE	116.08292:561 116.10489:296 116.14288:1305 118.08574:572 121.05087:5824		949.855
PS 39:0	9.43017	834.617	1262.65	3337.26	115.923	[M+H]+	Postive	JPCHJQQUIDDGCJ-WMQSFMSKNA-N				FALSE	834.61658:1026 835.61676:695 839.56726:368		841.316
LPC 18:1; PlaSMA ID-2759	11.1845	522.349	1030.02	3315.1	115.154	[M+H]+	Postive	YAMUFBLWGFFICM-UHFFFAOYNA-N	Lipids and lipid-like molecules	Glycerophospholipids	Glycerophosphocholines	FALSE	522.34943:1194 523.35205:619		818.066
Actinonin13434-13-4	8.46967	386.265	1385.31	3309.77	114.969	[M+H]+	Postive	XJLATMLVMSFZBN-UHFFFAOYNA-N	Organic acids and derivatives	Carboxylic acids and derivatives	Amino acids, peptides, and analogues	FALSE	385.8793:211 386.2648:1413 386.33261:279 386.35922:260 387.26852:525 387.33502:230 390.24295:307 390.29691:1011 391.20932:249		937.318
Veratramine; LC-ESI-TOF; ; CE	8.96398	410.303	1406.52	3300.7	114.654	[M+H]+	Postive	MALFODICFSIXPO-KFKQDBFTSA-N	Benzenoids	Fluorenes		FALSE	410.30344:1723 411.24927:322 411.30679:583 411.3808:224 413.36807:229 414.28165:278 414.3204:268		950.74
C16H26O9	4.97037	385.146	1207.97	3290.78	114.309	[M+Na]+	Postive	IVUFRBWVXKXZMM-UHFFFAOYNA-N	Lipids and lipid-like molecules	Prenol lipids	Terpene glycosides	FALSE	385.14594:1337 385.25421:239 385.31488:227 386.14813:502 386.19479:339 386.29602:230 387.24438:208		902.503
3-Indoleacetic acid	3.49878	174.056	1323.91	3272.18	113.663	[M-H]-	Negative	SEOVTRFCIGRIMH-UHFFFAOYSA-N	Organoheterocyclic compounds	Indoles and derivatives	Indolyl carboxylic acids and derivatives	FALSE	173.83623:218 173.85612:233 174.05569:1821 174.83871:959 174.90714:265 175.05879:297 175.84651:394 176.8367:487 177.84496:5974 177.90286:668 178.85728:365		977.644
7-(2-aminophenyl)heptanoic acid	5.53497	263.173	1579.14	3256.1	113.104	[M+H]+	Postive	ZFXXVVRQQNCNDM-UHFFFAOYSA-N	Lipids and lipid-like molecules	Fatty Acyls	Fatty acids and conjugates	FALSE	263.13242:453 263.17276:1921 263.23602:395 263.95297:331 263.98431:303 264.23212:14074 265.06363:212 265.13852:738 265.23544:2497 266.24136:282 267.16168:369 267.19452:579 267.23138:700 267.26553:665 267.90298:243		814.056
Spiro[naphthalene-1(2H),2'-oxirane]-2,3-diol, 5-[2-(3-furanyl)ethyl]octahydro-5,6,8a-trimethyl-, (1R,2S,3R,5S,6R,8aR)-	9.21023	352.245	1445.14	3251.89	112.958	[M+H]+	Postive	DORFFLQTHPKFDY-UHFFFAOYNA-N	Organoheterocyclic compounds	Heteroaromatic compounds		FALSE	352.24527:1708 352.89618:258 353.19647:324 353.24948:371 353.30673:280 354.26334:229 355.0947:202 355.27463:243 356.31485:341		827.34
lysoPC 18:1	4.97037	544.335	1361.22	3243.43	112.664	[M+H]+	Postive	PZRFVAHZNWPPAC-HLZANXBCNA-N	Lipids and lipid-like molecules	Glycerophospholipids	Glycerophosphocholines	FALSE	543.98651:344 544.33496:1465 545.33563:340 546.84106:203 547.96667:220		914.927
Riboflavin	3.9383	375.132	1283.8	3238.14	112.48	[M-H]-	Negative	AUNGANRZJHBGPY-SCRDCRAPSA-N	Organoheterocyclic compounds	Pteridines and derivatives	Alloxazines and isoalloxazines	FALSE	375.13202:1954 375.21988:330 377.56424:233		912.722
DG 36:7	9.74347	628.499	1594.95	3226.57	112.079	[M+H]+	Postive	LKMPWHWTIZCBBZ-CMXYVZQZNA-N	Lipids and lipid-like molecules	Glycerolipids	Diradylglycerols	FALSE	628.49921:1688 629.50262:722 630.50616:274 631.41364:232 631.80725:212 633.45752:859		838.36
(2alpha,3alpha,5xi,9xi,18xi)-2,3,19-Trihydroxyurs-12-en-28-oic acid	5.43863	489.358	1423.53	3214.85	111.672	[M+H]+	Postive	OXVUXGFZHDKYLS-UHFFFAOYNA-N	Lipids and lipid-like molecules	Prenol lipids	Triterpenoids	FALSE	489.35794:1627 490.35681:380 491.29749:239 491.44839:211 493.39185:221 493.45963:276		941.743
Aluminum coprogen [M+Al-2H]	3.57235	793.36	1319.31	3200.31	111.167	[M+H]+	Postive	RMMGFVUZESZYGT-UHFFFAOYNA-N				FALSE	793.35968:1531 794.36157:822		844.014
C28H40O5	9.22465	479.274	1481.96	3127.38	108.633	[M+H]+	Postive	ASOIHOGDYISNRH-UHFFFAOYNA-N	Organoheterocyclic compounds	Naphthopyrans		FALSE	479.27426:1782 479.31723:346 480.27966:206 481.27985:501		825.535
2-Propenoic acid, 3-[(1R,4S,7R,7aR)-1-(acetyloxy)-2,4,5,6,7,7a-hexahydro-3,7-dimethyl-1H-inden-4-yl]-2-methyl-, (2E)-	7.8481	315.157	1428.52	3112.12	108.103	[M+H]+	Postive	VBBXZFLAYWAXSK-UHFFFAOYNA-N	Lipids and lipid-like molecules	Prenol lipids	Sesquiterpenoids	FALSE	315.15668:1449 316.13672:527 316.1586:461 316.22552:2037 316.31808:589 316.92819:348 317.15143:339 318.23932:395 318.27969:1495 318.86292:235 319.28329:337 320.11697:202		947.462
N-2-Hydroxycyclopentyladenosine	3.89607	352.166	1515.26	3080.16	106.993	[M+H]+	Postive	GYWXTRVEUURNEW-QPIWWKSXSA-N	Nucleosides, nucleotides, and analogues	Purine nucleosides		FALSE	352.16562:1811 353.17041:316 353.18921:252 353.23169:338 353.26727:388 353.30145:626 353.34003:267 353.37231:208 354.27194:231 354.34421:424 354.92953:254 355.28442:431 355.31766:452 356.19519:226		907.423
C18H22O7; PlaSMA ID-1925	0.250417	351.151	1212.38	3077.07	106.885	[M+H]+	Postive					FALSE	351.15076:1334 351.24948:229 351.28751:465 351.32385:489 351.48553:530 351.82211:420 352.15414:215 352.30432:202 353.15561:5043 353.23074:218 353.30527:721 353.34125:288 353.65683:1219 353.89072:246 354.15677:780 355.24478:440 355.28189:395 355.32245:294		893.012
5(S)-5-carboxystrictosidine	10.4512	573.206	1105.96	3060.67	106.316	[M-H]-	Negative	LHKZIVMTXZLOTP-UHFFFAOYNA-N	Lipids and lipid-like molecules	Prenol lipids	Terpene glycosides	FALSE	573.20551:1266 574.21136:409 576.8689:242 577.77332:247		945.348
C23H24O10; PlaSMA ID-2519	5.53292	461.144	1655.7	3028.54	105.2	[M+H]+	Postive					FALSE	461.14426:1957 461.39734:247 462.14203:309 463.14053:24177 463.44559:228 464.14276:6285 465.13821:10351 465.28125:320 465.43161:431 465.46115:238 466.13895:3036		968.382
Scalarin	9.30938	445.293	1370.3	3017.3	104.809	[M+H]+	Postive	VLFJWLVMFJQJEU-UHFFFAOYNA-N	Lipids and lipid-like molecules	Prenol lipids	Sesterterpenoids	FALSE	445.2933:1766 446.32098:347 447.38681:205 449.39053:223		867.895
Phenyl-beta-glucopyranoside	3.68105	255.088	1089.97	2998	104.139	[M-H]-	Negative	NEZJDVYDSZTRFS-UHFFFAOYNA-N	Organic oxygen compounds	Organooxygen compounds	Carbohydrates and carbohydrate conjugates	FALSE	255.08798:1217 255.12155:203 255.79103:425 255.82217:9391 256.07352:247 256.09171:238 256.82159:619 257.81921:7556 258.81836:673 259.81631:3040		965.412
Cilnidipine	9.36115	493.201	1275.03	2986.14	103.727	[M+H]+	Postive	KJEBULYHNRNJTE-DHZHZOJOSA-N	Organoheterocyclic compounds	Pyridines and derivatives	Hydropyridines	FALSE	493.20114:1753 493.84961:2240 494.20422:248 494.35944:830 495.30225:259 495.36118:221 496.32922:2099 496.8316:379 497.33881:288 497.41763:375		838.733
N-ACETYLPUTRESCINE	0.65325	131.118	1126.49	2985.55	103.706	[M+H]+	Postive	KLZGKIDSEJWEDW-UHFFFAOYSA-N	Organic acids and derivatives	Carboximidic acids and derivatives	Carboximidic acids	FALSE	130.93092:401 130.96292:617 130.9774:527 131.00964:495 131.0271:1072 131.04527:445 131.06911:434 131.09241:361 131.11772:1190 131.16118:287 131.9296:1851 131.96086:422 132.00284:1075 132.95744:377 132.97356:648 133.00714:1823 133.07671:379 133.92618:659 134.00696:343 135.02196:1460 135.06618:215 135.11575:447		971.38
Taurocholic acid	3.51107	516.298	1266.61	2976.42	103.389	[M+H]+	Postive	WBWWGRHZICKQGZ-HZAMXZRMSA-N	Lipids and lipid-like molecules	Steroids and steroid derivatives	Bile acids, alcohols and derivatives	FALSE	516.17627:247 516.29767:1488 517.30719:275 519.4389:243 521.16901:307 521.25775:230		916.216
(7alpha,9xi,13alpha,17alpha)-17-(5-Methoxy-2-oxo-2,5-dihydro-3-furanyl)-4,4,8-trimethyl-3-oxoandrosta-1,14-dien-7-yl acetate	4.88227	500.304	1151.63	2975.73	103.365	[M+H]+	Postive	BVJTWZUQDZHHBX-UHFFFAOYNA-N	Lipids and lipid-like molecules	Prenol lipids	Triterpenoids	FALSE	500.30377:1080 500.39011:336 501.31732:273 504.32962:220		821.018
4-hydroxybenzoic acid	6.7897	139.039	1723.53	2951.51	102.524	[M+H]+	Postive	FJKROLUGYXJWQN-UHFFFAOYSA-N	Benzenoids	Benzene and substituted derivatives	Benzoic acids and derivatives	FALSE	138.96355:562 139.03856:2357 139.07462:733 139.11208:277 139.96404:1432 140.06705:1215 140.9592:1751 140.99521:323 141.05618:230 141.08936:427 141.11244:1465 141.9184:223 141.95836:10705 142.96025:1250 143.00061:4306 143.03883:2833 143.08812:470 143.10732:430 143.54309:376 143.91643:219 143.95906:664		957.061
(3S,6R,9S,12R,15S,18R)-4,10,16-trimethyl-3,6,9,12,15,18-hexa(propan-2-yl)-1,7,13-trioxa-4,10,16-triazacyclooctadecane-2,5,8,11,14,17-hexone	4.86708	662.394	1362.37	2941.45	102.175	[M+H]+	Postive	MIZMDSVSLSIMSC-UHFFFAOYNA-N	Organic acids and derivatives	Peptidomimetics	Depsipeptides	FALSE	662.39453:1276 663.396:213 667.34766:418		811.277
PE 22:0	4.70067	574.344	1508.54	2940.76	102.151	[M+H]+	Postive	YDBPIVVHNPERCO-KSYWNVGFNA-N	Lipids and lipid-like molecules	Glycerophospholipids	Glycerophosphoethanolamines	FALSE	574.34436:1452 575.34924:389 576.34882:396 577.55505:247 579.29333:340		832.602
3,5,7,15-tetraacetoxy-2-hydroxy-8-isobutyroyloxy-9,14-dioxojatropha-6(17),11E-diene (2)	10.2744	659.265	1863.76	2929.24	101.75	[M+H]+	Postive	NLKSLCYYSLLAMB-UHFFFAOYNA-N	Lipids and lipid-like molecules	Prenol lipids	Diterpenoids	FALSE	659.26501:2570 660.26819:687 661.27075:556 661.48804:248 662.44067:202		893.331
FA 18:4	4.78608	275.202	1115.51	2919.44	101.41	[M-H]-	Negative	IJTNSXPMYKJZPR-DMIMTURISA-N	Lipids and lipid-like molecules	Fatty Acyls	Lineolic acids and derivatives	FALSE	274.7644:284 275.20239:1898 277.77112:466 279.7648:230		892.179
lysoPC 17:1	4.6051	530.317	1311.94	2911.01	101.117	[M+H]+	Postive	LPMGFNAQZPADDZ-UXBMOYMKNA-N	Lipids and lipid-like molecules	Glycerophospholipids	Glycerophosphocholines	FALSE	530.31696:1435 531.32288:487 533.48987:200 535.27075:407		829.027
Spiro[2H-furo[2,3-e]isoindole-2,1'(2'H)-naphthalen]-6(3H)-one, 7'-(acetyloxy)-3',4',4'a,5',6',7,7',8,8',8'a-decahydro-4,6'-dihydroxy-2',5',5',8'a-tetramethyl-, (2R,2'R,4a'S,6'S,8a'S)-	4.24918	444.243	1062.72	2889.49	100.37	[M+H]+	Postive	MLWSQMMSROWDTI-UHFFFAOYNA-N	Organoheterocyclic compounds	Isoindoles and derivatives	Isoindoles	FALSE	444.24255:1090 445.25131:278 446.24799:270 447.34256:205 449.19962:213		826.533
(3Z)-6-Hydroxy-3-(1H-imidazol-5-ylmethylene)-12-methoxy-7a-(2-methyl-3-buten-2-yl)-7a,12-dihydro-1H,5H-imidazo[1',2':1,2]pyrido[2,3-b]indole-2,5(3H)-dione	7.61652	434.185	1397.01	2850.62	99.0194	[M+H]+	Postive	JTJJJLSLKZFEPJ-UHFFFAOYNA-N	Organoheterocyclic compounds	Indoles and derivatives	Pyridoindoles	FALSE	434.18463:1802 434.24438:6744 434.68506:535 435.16934:961 435.24634:1034 436.17487:212 436.24509:307 436.27032:206 436.95642:1005 437.19373:135495 437.83038:227 438.1973:31900 438.27426:692 438.40317:285 438.68204:206		957.778
TG 49:11	11.4244	821.576	1533.27	2850.07	99.0003	[M+H]+	Postive	LDZJXIQSQMRKGI-GRXKVWSTNA-N	Lipids and lipid-like molecules	Glycerolipids	Triradylcglycerols	FALSE	821.57599:1866 822.57977:951 823.58148:248		869.587
2-LAHPA	9.8429	533.455	1490.04	2795.07	97.0899	[M-H]-	Negative	GYINRRUHPCQRDL-BCTRXSSUSA-N	Lipids and lipid-like molecules	Fatty Acyls	Fatty acids and conjugates	FALSE	533.45465:2556 534.45782:864 536.06458:718 536.91858:208		930.336
beta-Sitosterol	9.5558	397.38	2392.31	2787.2	96.8168	[M+H]+	Postive	KZJWDPNRJALLNS-GDQWMHGZSA-N	Lipids and lipid-like molecules	Steroids and steroid derivatives	Stigmastanes and derivatives	FALSE	397.38007:3002 398.38174:843 399.30829:1233 399.39099:345 400.18143:228 400.31366:421 401.30936:245		822.383
PS 33:6	4.01378	738.438	1562.65	2779.92	96.5637	[M+H]+	Postive	ASCRTIKJVIZKDO-OXWJIUSFNA-N				FALSE	738.43842:1552 739.4436:698 740.44025:288		891.803
(2R,3R,6R)-5-[(1E,3E)-hepta-1,3-dienyl]-2,3-dihydroxy-6-(hydroxymethyl)cyclohexan-1-one	6.49508	272.187	1170.08	2779	96.5318	[M+NH4]+	Postive	MPOXQBRZHHNMER-UHFFFAOYNA-N	Organic oxygen compounds	Organooxygen compounds	Alcohols and polyols	FALSE	272.15009:374 272.18661:1459 272.22934:391 272.94238:614 273.17471:288 274.2739:19677 274.33539:272 274.93399:221 275.15002:249 275.19818:352 275.2771:3341 275.936:351 276.28018:381 277.10782:213 277.14017:393 277.17535:266		842.22
Olean-12-en-28-oic acid, 3-[(2-O-beta-D-glucopyranosyl-alpha-L-arabinopyranosyl)oxy]-23-hydroxy-, (5xi,9xi)-	4.35137	789.443	1446.71	2777.91	96.494	[M+Na]+	Postive	RROGHRHLBLVQSG-UHFFFAOYNA-N	Lipids and lipid-like molecules	Prenol lipids	Triterpenoids	FALSE	789.44257:1558 790.45111:459 791.45984:204		849.501
2-Pentenoic acid, 3-[(acetyloxy)methyl]-5-[(1S,4aR,8aR)-2-formyl-1,4,4a,5,6,7,8,8a-octahydro-5,5,8a-trimethyl-1-naphthalenyl]-, (2E)-	4.13895	377.232	1288.42	2766.57	96.0999	[M+H]+	Postive	KLGPVOFVVYHEGO-UHFFFAOYNA-N	Lipids and lipid-like molecules	Prenol lipids	Diterpenoids	FALSE	377.23209:1256 377.73605:475 378.23141:200 378.3382:200 379.32114:256 379.35532:402 379.71371:834 380.21021:223 380.32135:219 381.33536:616 381.37302:331		903.924
Dehydrophytosphingosine (not validated, isomer of 1679); PlaSMA ID-1677	7.39827	316.284	1307.99	2761.38	95.9197	[M+H]+	Postive	CQKNELOTFUSOTP-UHFFFAOYNA-N	Organic nitrogen compounds	Organonitrogen compounds	Amines	FALSE	316.22278:1164 316.28375:1173 316.84674:206 316.92838:725 317.2337:296 318.27972:2146 319.28134:664 321.16772:240 321.23776:265 321.28152:211		944.566
2H-Pyran-5-carboxylic acid, 3-ethenyl-2-(beta-D-glucopyranosyloxy)-3,4-dihydro-4-(2-hydroxyethyl)-, methyl ester, (2S,3R,4S)-	2.41227	413.14	1129.76	2737.97	95.1066	[M+H]+	Postive	GHRNLKSWTKHISE-UHFFFAOYNA-N	Lipids and lipid-like molecules	Prenol lipids	Terpene glycosides	FALSE	413.13983:1453 413.25665:317 413.28189:279 413.37128:248 414.23007:554 414.32446:296 414.51035:212 417.30026:228		902.057
GlcNAcThrNAc	0.252483	365.154	1035.22	2736.04	95.0396	[M+H]+	Postive	CUSVKSYUKVCGOL-UYHBOPCKSA-N	Organic oxygen compounds	Organooxygen compounds	Carbohydrates and carbohydrate conjugates	FALSE	364.95255:209 365.15369:1376 365.18887:265 365.24869:490 365.29688:250 365.33658:508 365.82233:225 366.15494:216 367.24915:287 367.28326:810 367.33942:335 369.22589:218 369.26483:233 369.29892:300 369.33658:363 369.8006:259		923.459
5-[3-[[(E)-3-(3,4-dihydroxyphenyl)prop-2-enoyl]oxymethyl]-5-hydroxypentyl]-5,6,8a-trimethyl-3,4,4a,6,7,8-hexahydronaphthalene-1-carboxylic acid	9.19993	501.285	1451.11	2712.45	94.2201	[M+H]+	Postive	UVGRPMWFXIDHJC-UHFFFAOYNA-N	Lipids and lipid-like molecules	Prenol lipids	Diterpenoids	FALSE	500.83411:216 501.28506:1916 502.28497:734 502.37466:1462 503.05325:360 503.37433:644 504.0437:231 504.3009:237 505.04285:381		919.05
Gardnutine; PlaSMA ID-1731	9.33282	323.175	1557.81	2709.65	94.1229	[M+H]+	Postive	XJTWLFBHBFSVRS-UHFFFAOYNA-N	Alkaloids and derivatives	Macroline alkaloids		FALSE	323.10971:223 323.17499:1432 323.21976:264 323.25974:268 324.17654:352 325.23495:260 326.30579:2033 327.30191:500		987.147
Mometasone furoate	0.311183	543.13	1420.79	2685.64	93.2888	[M+H]+	Postive	WOFMFGQZHJDGCX-RRDYVFDESA-N	Lipids and lipid-like molecules	Steroids and steroid derivatives	Pregnane steroids	FALSE	543.13013:2074 544.13647:236 544.7395:280		994.312
Mupirocin	7.07632	501.304	1452.24	2673.33	92.8612	[M+H]+	Postive	MINDHVHHQZYEEK-UHFFFAOYNA-N	Lipids and lipid-like molecules	Fatty Acyls	Fatty acids and conjugates	FALSE	501.30371:1557 502.30585:551 502.37436:244 503.04819:22950 504.04974:5276 505.04602:14043 505.46674:207 506.04907:3692		933.356
Feruloyl agmatine (isomer of 1608); PlaSMA ID-1607	3.96973	307.176	1338.47	2664.52	92.5551	[M+H]+	Postive	UBMDAKWARMURDL-UHFFFAOYSA-N	Benzenoids	Phenols	Methoxyphenols	FALSE	306.90952:322 307.12762:231 307.17612:2179 307.67465:330 308.16171:816 308.66837:210 309.21054:248 309.24149:385 310.27866:232 311.18008:219 311.22198:597 311.25772:507 311.29288:823		949.515
FA 16:4	8.69135	247.17	1356.46	2658.68	92.3525	[M-H]-	Negative	MMJOQCPKGDKDLB-BEGPLMEHSA-N	Lipids and lipid-like molecules	Fatty Acyls	Fatty acids and conjugates	FALSE	247.16975:2099 248.91287:281 248.97281:217397 249.86371:206 249.97461:5362 250.14462:239 250.86472:304 251.79747:217		934.316
Olean-12-ene-23,28-dioic acid, 16-hydroxy-3-(beta-D-xylopyranosyloxy)-, (3beta,5xi,9xi,16alpha)-	4.05957	633.368	1114.4	2651.16	92.0912	[M-H]-	Negative	CFAJIMXUZRPYDP-UHFFFAOYNA-N	Lipids and lipid-like molecules	Prenol lipids	Triterpenoids	FALSE	633.36829:1265 634.36871:328		847.171
PC 37:9	5.36757	808.491	1264.19	2621.26	91.0523	[M+H]+	Postive	ACOYBSUGJHSSBU-TUSUQYNXNA-N	Lipids and lipid-like molecules	Glycerophospholipids	Glycerophosphocholines	FALSE	808.49091:1310 809.48901:333 810.49066:233 813.44922:304		892.197
C18H34N2O8; PlaSMA ID-2211	4.07095	407.239	1278.93	2608.24	90.6001	[M+H]+	Postive					FALSE	407.23856:1403 407.3541:451 407.38358:381 408.24728:273 409.16397:370 409.36966:336		988.688
3-(8-hydroxyoctyl)phenol	8.68805	221.155	1118.41	2605.14	90.4926	[M-H]-	Negative	SLVFVSVYCYGPJP-UHFFFAOYSA-N	Lipids and lipid-like molecules	Fatty Acyls	Fatty alcohols	FALSE	220.81746:255 220.84274:481 220.87343:379 221.15536:1602 221.81764:249 221.84261:3846 222.05368:291 222.15787:414 222.83249:1200 223.16997:393 223.79881:469 223.83994:696 223.94096:201 224.82996:752 225.05417:218 225.83659:293 225.92551:419		951.13
Feruloyl O-methyldopamine; PlaSMA ID-1893	0.24835	344.151	1228.59	2597.61	90.2309	[M+H]+	Postive	ACSWAJLDOHJFNA-UHFFFAOYSA-N	Phenylpropanoids and polyketides	Cinnamic acids and derivatives	Hydroxycinnamic acids and derivatives	FALSE	344.15146:1743 344.65103:446 345.1467:266 345.79587:246		890.765
Hexose + C13H21O2 (isomer of 1144); PlaSMA ID-1145	7.75758	433.202	1037.94	2594.76	90.132	[M-H2O-H]-	Negative	SMBCGBWABYMHIN-UHFFFAOYNA-N	Organic oxygen compounds	Organooxygen compounds	Carbohydrates and carbohydrate conjugates	FALSE	433.20224:931 434.20505:509		899.383
5-Benzofuranpropanoic acid, 4-(beta-D-glucopyranosyloxy)-6-methoxy-	2.3793	421.11	1197.57	2577.97	89.5487	[M+H]+	Postive	OLFRCQFNQXYDGW-UHFFFAOYNA-N	Organic oxygen compounds	Organooxygen compounds	Carbohydrates and carbohydrate conjugates	FALSE	421.11011:1144 421.29129:223 421.36728:390 421.39941:323 421.61298:467 422.36768:317 423.31058:218 423.38351:506 423.42117:277 424.34628:210 425.31699:573 425.35919:487 425.39969:366 425.43158:217		917.182
Heptadecanoic acid	6.45233	271.272	1143.02	2567.7	89.1918	[M+H]+	Postive	KEMQGTRYUADPNZ-UHFFFAOYSA-N	Lipids and lipid-like molecules	Fatty Acyls	Fatty acids and conjugates	FALSE	270.94614:678 271.11591:203 271.25684:1174 271.27219:1337 271.91788:335 272.2309:381 272.27774:376 272.94388:956 273.16824:328 273.18668:211 273.25174:235 273.28229:230 273.90695:223 273.95837:233 274.20056:214 274.27408:1618 274.30814:330 275.11792:261		887.687
Leupeptin	9.4716	427.303	1020.97	2535.12	88.0605	[M+H]+	Postive	GDBQQVLCIARPGH-ZACQAIPSSA-N	Organic acids and derivatives	Carboxylic acids and derivatives	Amino acids, peptides, and analogues	FALSE	427.30338:1052 427.39197:434 428.31024:367 428.32874:327 429.31906:538 430.91418:903 432.26297:263		951.26
PIPES	4.20795	303.068	1173.89	2526.64	87.7657	[M+H]+	Postive	IHPYMWDTONKSCO-UHFFFAOYSA-N	Organoheterocyclic compounds	Diazinanes	Piperazines	FALSE	302.92242:347 303.06805:1271 303.13:214 304.91245:455 307.2608:358		921.907
1,2,3,4-Tetrahydro-6,7-dimethoxy-1-methylisoquinolinyl-8,12dihydro-5,6-epoxy-2-hydroxyalantolactone	4.78103	456.279	1281.55	2502.96	86.943	[M+H]+	Postive	ZFZHYNHHVLSRHQ-UHFFFAOYNA-N	Lipids and lipid-like molecules	Prenol lipids	Terpene lactones	FALSE	456.27927:1215 456.33234:228 456.40353:270 457.06427:1886 457.28412:468 458.06293:378 459.05988:1690 460.06311:318 461.06119:527 461.23828:594		840.873
4'-Hydroxy-5,7-dimethoxyflavanone	7.07425	301.107	1639.73	2477.54	86.06	[M+H]+	Postive	REBBZOCNEVVAPX-UHFFFAOYSA-N	Phenylpropanoids and polyketides	Flavonoids	O-methylated flavonoids	FALSE	301.10721:1365 302.11121:264 302.20639:328 302.30313:437 302.91714:5490 303.19104:232 303.91937:343 304.26169:207 304.27942:232 304.91458:3055 305.16544:328 305.21194:309		987.845
2-amino-5-[2-[[2,3-dihydroxy-2-(1-hydroxyethyl)butanoyl]oxymethyl]-4-hydroxyanilino]-5-oxopentanoic acid	7.17807	415.17	1059.23	2441.54	84.8098	[M+H]+	Postive	JMRJLJOBHHWYIV-UHFFFAOYNA-N	Organic acids and derivatives	Carboxylic acids and derivatives	Amino acids, peptides, and analogues	FALSE	415.16986:1098 415.23932:211 415.30283:201 416.03143:215 416.17059:551 417.25629:269 419.27603:216		879.259
Indole-3-acetaldehyde	4.71187	158.06	1109.4	2405.14	83.5454	[M-H]-	Negative	WHOOUMGHGSPMGR-UHFFFAOYSA-N	Organoheterocyclic compounds	Indoles and derivatives	Indoles	FALSE	157.86314:3211 158.06003:1577 158.8468:1160 158.98105:276 159.93852:234 160.53455:247 160.84187:15761 160.93536:1297 161.84146:500 161.91266:506 161.93454:821 161.99715:260 162.83908:15378 162.88969:383 162.93089:1817		932.06
DGTS 29:7	10.1108	656.451	1241.01	2404.4	83.5197	[M+H]+	Postive	WBUUTNYHASIZNY-YOIXCXAXSA-N	Lipids and lipid-like molecules	Glycerolipids	Triradylcglycerols	FALSE	656.45135:1637 657.45789:701		947.315
Nadolol	8.93307	310.202	1093.99	2392.45	83.1043	[M+NH4]+	Postive	VWPOSFSPZNDTMJ-UCWKZMIHSA-N	Benzenoids	Tetralins		FALSE	310.20203:1060 311.21088:254 311.25519:327 311.29318:389 313.16211:303 313.23953:349 314.27008:251 314.34174:245 314.84943:278		915.45
Dolasetron	3.23163	325.158	1641.13	2375.07	82.5008	[M+H]+	Postive	UKTAZPQNNNJVKR-AKJUYKBHSA-N	Organoheterocyclic compounds	Indoles and derivatives	Indolecarboxylic acids and derivatives	FALSE	325.15784:1581 325.1958:525 325.23837:321 325.27084:512 325.30969:379 325.91714:293 326.1582:414 327.21335:342 327.25284:506 327.28705:253 327.89026:255 328.25037:232 328.28995:332 328.96042:239 329.15265:253 329.69357:220		972.149
(4S,5S,6E,8S,10R)-4,5,8-Trihydroxy-10-methyl-3,4,5,8,9,10-hexahydro-2H-oxecin-2-one	3.64525	239.088	1378.51	2374.33	82.475	[M+Na]+	Postive	HWMMWMJBUOCCFZ-UHFFFAOYNA-N	Organoheterocyclic compounds	Oxocins		FALSE	239.08806:1811 239.12334:530 239.16336:1099 239.19931:687 239.23532:248 240.13885:210 241.15364:290 241.17747:559 241.21431:602 241.25008:205 242.18373:268 243.1205:232 243.16119:666 243.19513:475		939.136
B'	9.12703	898.609	1059.5	2364.15	82.1215	[M+H]+	Postive	IEWHPTFFMRBBPQ-UHFFFAOYNA-N	Organic acids and derivatives	Carboxylic acids and derivatives	Amino acids, peptides, and analogues	FALSE	898.60889:1159 899.61292:713 900.61841:224 903.56018:207		942.722
(2R,3R,4S,5S,6R)-2-octoxy-6-[[(2S,3R,4S,5R)-3,4,5-trihydroxyoxan-2-yl]oxymethyl]oxane-3,4,5-triol	4.36992	442.264	1102.4	2331.18	80.9762	[M+H]+	Postive	IBSNNVHJJNLMJW-UHFFFAOYNA-N	Lipids and lipid-like molecules	Fatty Acyls	Fatty acyl glycosides	FALSE	442.26416:1400 442.31021:315 443.27045:430 444.32047:201 444.36313:207 447.21964:475		951.379
ARTESUNATE	6.60172	407.164	1235.2	2321.08	80.6253	[M+H]+	Postive	FIHJKUPKCHIPAT-UHFFFAOYNA-N	Lipids and lipid-like molecules	Prenol lipids	Sesquiterpenoids	FALSE	407.16406:1409 407.24231:229 407.28622:212 407.31479:319 407.38623:244 408.16544:684 409.02982:231 409.33401:242 409.36719:542 411.31052:348 411.34561:841		831.484
4-(Cytisin-12-amido)-benzoic acid	3.22338	354.143	1263.7	2317.93	80.5159	[M+H]+	Postive	ANCRUIZRJBSARJ-UHFFFAOYNA-N	Alkaloids and derivatives	Lupin alkaloids	Cytisine and derivatives	FALSE	354.14319:1640 354.21823:1015 354.30515:212 355.146:673 355.16968:275 355.21048:451 355.23822:320 355.28363:254 356.29138:259 356.31711:242 357.19205:285 357.22318:267 357.25687:448 357.29892:211		870.868
Venlafaxine	7.21928	278.211	1227.29	2312.08	80.3129	[M+H]+	Postive	PNVNVHUZROJLTJ-UHFFFAOYSA-N	Benzenoids	Phenol ethers	Anisoles	FALSE	278.21048:1655 279.09216:380 279.15723:369 279.1908:541 279.22781:362 281.05466:264 281.13815:399 281.18311:576 281.21158:825 281.24554:569 282.27936:1102 283.15436:330 283.18808:586		922.889
Cyclopenta[c]pyran-4,7-dicarboxylic acid, 1-(beta-D-glucopyranosyloxy)-1,4a,5,6,7,7a-hexahydro-5,6-dihydroxy-, dimethyl ester, (1S,4aS,6R,7R,7aS)-	8.94132	473.131	1229.35	2299.42	79.8731	[M+H]+	Postive	BSLDUMMCFUUGHA-UHFFFAOYNA-N	Lipids and lipid-like molecules	Prenol lipids	Terpene glycosides	FALSE	473.13083:1648 473.24872:275 473.37796:350 473.43665:210 474.13663:443 475.32547:1712 476.32169:417 476.38046:211 477.32339:420 477.35144:292		871.69
Flavanone + 4O, 1Prenyl; PlaSMA ID-1996	4.80448	357.137	1016.77	2265.46	78.6932	[M+H]+	Postive	MERHMOCEIBOOMA-UHFFFAOYNA-N	Phenylpropanoids and polyketides	Isoflavonoids	Isoflavans	FALSE	357.13687:1091 357.26151:784 358.23831:530 361.24133:542		882.599
C21H23NO5	7.45185	387.192	1271.56	2252.09	78.2289	[M+H]+	Postive	UVACAWVKXUAPRQ-UHFFFAOYNA-N	Organoheterocyclic compounds	Benzazepines		FALSE	387.19174:1064 388.19666:330 388.9162:202 389.2507:280 389.2739:219 391.07388:233 391.24725:237		959.338
Olean-12-en-28-oic acid, 2,3,19-trihydroxy-, (2alpha,3beta,5xi,9xi,19alpha)-	5.43658	471.348	1133.7	2113.23	73.4054	[M+H]+	Postive	XJMYUPJDAFKICJ-UHFFFAOYNA-N	Lipids and lipid-like molecules	Prenol lipids	Triterpenoids	FALSE	471.13647:2814 471.34772:1035 471.39307:210 472.1333:3047 472.35538:629 472.43384:206 473.13275:3094 473.16458:1652 473.35541:276 474.13397:1568 475.12869:2056 475.3259:754 476.13135:317 476.16989:369 476.32919:276		834.055
lysoPC 22:5	4.64502	570.357	1145.6	2113.06	73.3996	[M+H]+	Postive	YBUXFQUGNPBZPS-ASNUFOLXNA-N	Lipids and lipid-like molecules	Glycerophospholipids	Glycerophosphocholines	FALSE	570.35718:1240 570.86121:1076 571.35614:224 572.34802:703 573.34491:359		913.507
(E)-1-(4-hydroxy-3-methoxyphenyl)dodec-4-en-3-one	8.80172	322.237	1137.28	2084.59	72.4107	[M+H]+	Postive	LGZSMXJRMTYABD-UHFFFAOYSA-N	Benzenoids	Phenols	Methoxyphenols	FALSE	322.237:1133 323.1778:209 323.21671:227 323.25031:410 325.15811:211 325.23434:347 325.27405:807 325.31204:215 325.92004:223 326.26389:336		910.827
Abieta-8(14),9(11),12-triene-7,18-diol	7.67085	344.26	1256.16	2064.95	71.7284	[M+H]+	Postive	PORHOKHIMOFMMH-UHFFFAOYNA-N	Lipids and lipid-like molecules	Prenol lipids	Diterpenoids	FALSE	344.1217:6131 344.25974:1614 344.30862:354 345.12408:1625 345.26886:276 346.1196:3187 346.23602:257 347.12347:661 347.25568:233 347.89655:328		880.067
MGDG 26:2	9.26665	665.422	1048.08	1895.91	65.8565	[M+H]+	Postive	LHVLNPVZHMKNLJ-YNMDBXHKSA-N				FALSE	665.42242:1607 666.4278:334 669.57227:275		888.382
5-hydroxy-2,2,6,6-tetramethyl-4-[3-methyl-1-[2,4,6-trihydroxy-3-(2-methylpropanoyl)phenyl]butyl]cyclohex-4-ene-1,3-dione	3.16568	429.232	1074.23	1878.98	65.2686	[M+H]+	Postive	ZGUNMNCNGJXADK-UHFFFAOYNA-N	Organic oxygen compounds	Organooxygen compounds	Carbonyl compounds	FALSE	429.2323:1053 429.32413:225 429.37106:274 430.23633:432 431.26105:286		812.309
Pseudojervine; PlaSMA ID-2958	5.04818	588.359	1460.08	1878.19	65.2411	[M+H]+	Postive	HYDDDNUKNMMWBD-UHFFFAOYNA-N	Lipids and lipid-like molecules	Steroids and steroid derivatives	Steroidal glycosides	FALSE	588.35858:1834 589.36169:459 593.31409:310		872.93
MAHANIMBINE	7.80688	332.2	1357.44	1876.98	65.1989	[M+H]+	Postive	HTNVFUBCWIYPJN-UHFFFAOYNA-N	Organoheterocyclic compounds	Indoles and derivatives	Carbazoles	FALSE	332.2001:1953 332.84558:220 333.09158:222 333.13223:225 333.20142:361 333.23627:203 335.15857:341 335.21716:531 335.25293:566 336.16257:200 337.16751:470		951.356
Prespatane	9.13322	205.194	1137.52	1846.89	64.1538	[M+H]+	Postive	KZVOHANKAKKFOK-UHFFFAOYNA-N	Lipids and lipid-like molecules	Prenol lipids	Sesquiterpenoids	FALSE	205.08418:394 205.19426:1071 207.09682:223 207.17499:307 208.17047:228 209.07875:335 209.11273:444		926.558
deoxy-PF1140	5.92202	262.178	1342.28	1815.97	63.0798	[M+H]+	Postive	ZAIJLHHXEHKKNH-UHFFFAOYNA-N	Organoheterocyclic compounds	Benzopyrans	1-benzopyrans	FALSE	262.17792:1613 263.16766:315 263.23691:315 264.23193:27911 264.29324:421 264.96133:237 265.06519:252 265.13965:554 265.17831:456 265.21237:350 265.23538:5048 265.90656:490 266.15125:624 266.16769:469 266.23929:581 267.08142:393 267.15714:635		837.207
1-Monostearin	9.93742	359.315	1163.46	1783.19	61.9412	[M+H]+	Postive	VBICKXHEKHSIBG-UHFFFAOYSA-N	Lipids and lipid-like molecules	Glycerolipids	Monoradylglycerols	FALSE	359.31528:1638 360.32083:562 362.32443:313 362.92511:1160 363.28778:235 364.28973:276		888.664
Phosphatidylethanolamine (16:0/18:2) Abbr: PLPE	11.4367	738.505	1021.93	1783.13	61.939	[M+H]+	Postive	HBZNVZIRJWODIB-UHFFFAOYNA-N	Lipids and lipid-like molecules	Glycerophospholipids	Glycerophosphoethanolamines	FALSE	738.50452:1177 739.33362:207 739.51416:520 740.54285:1325 741.54834:1534 742.51953:376 743.40173:242		955.218
MGDG 29:6	9.17237	699.404	1464.94	1779.17	61.8016	[M+H]+	Postive	PHCYHSYFMHFGDE-VBDZFHNTSA-N				FALSE	699.40393:1841 700.41461:550 701.41553:232 702.40918:218		821.766
4-Hydroxy-1-methoxy-6,6,9a-trimethyl-4,5,5a,6,7,8,9,9a-octahydronaphtho[1,2-c]furan-3(1H)-one	8.66003	303.156	1175.69	1292.22	44.8869	[M+H]+	Postive	DGADHBAZBHETGH-UHFFFAOYNA-N	Organoheterocyclic compounds	Naphthofurans		FALSE	302.91739:4761 303.15564:1680 303.2514:224 303.66235:213 303.92017:772 304.16284:334 304.25232:307 304.29706:644 304.91479:3736 305.13422:275 305.20425:211 305.9158:663 306.91077:205 307.15555:468 307.22321:501 307.30194:227		962.416
fluconazole	6.77938	307.111	1001.33	1093.46	37.9828	[M+H]+	Postive	RFHAOTPXVQNOHP-UHFFFAOYSA-N	Benzenoids	Benzene and substituted derivatives	Halobenzenes	FALSE	306.90845:687 307.04028:200 307.11145:1166 307.18582:254 307.2634:266 308.11124:497 309.10727:428 309.24048:760 309.27939:430 311.22168:341 311.25647:755 311.29755:359		907.105

## Sheet: Table S3
Supplementary Table S3.Identification of metabolites in the autoclaved fermented medium.
MetaboliteName	RT(min)	Precursor m/z	Height	Area	Relative area	AdductIon	Ion mode	InChIKey	Superclass	Class	Dot product	Reverse dot product	Fragment presence %	MS1 isotopes	MSMS spectrum	Total score
N-2-Hydroxycyclopentyladenosine	6.95547	352.163	2897068	28469930	170637	[M+H]+	Postive	GYWXTRVEUURNEW-QPIWWKSXSA-N	Nucleosides, nucleotides, and analogues	Purine nucleosides	-1	-1	-1	351.82205:319 351.89404:380 351.97052:697 352.16351:2897018 352.84164:954 352.88684:590 352.95392:618 352.99356:857 353.07596:2446 353.15924:1848828 353.75595:772 353.81784:577 353.85486:886 353.89386:425 353.95242:456 354.02713:748 354.05536:649 354.08847:727 354.12466:202 354.1597:327044 354.76395:410 354.81003:438 354.8356:490 354.897:388 354.93887:234 354.98648:207 355.04974:462 355.16312:363…		961.078
Linoleic acid	13.9635	279.237	1740943	18036560	108103	[M-H]-	Negative	OYHQOLUKZRVURQ-HZJYTTRNSA-N	Lipids and lipid-like molecules	Fatty Acyls	877.58	823.185	1000	278.74139:259 278.76672:229 278.83292:238 278.91501:205 278.96982:365 279.23682:3066036 279.82507:426 279.86212:831 279.90811:651 280.00021:444 280.05188:320 280.10492:423 280.23648:1046092 280.77679:816 280.81116:337 280.84976:334 280.87457:409 280.90439:408 280.94312:284 280.97256:322 281.03168:615 281.23984:110103 281.74655:227 281.9556:216 282.01526:222 282.24191:9559 282.31693:222 282.35715:…	59.01338:5488 71.01342:675 83.0499:528 97.06538:210 182.13077:223 205.19875:225 261.22086:3898 262.22437:1302 279.23254:420566	907.828
N2-Isobutyryl-2'-deoxyguanosine	6.4094	338.142	2110848	14234410	85315	[M+H]+	Postive	SIDXEQFMTMICKG-DJLDLDEBSA-N	Nucleosides, nucleotides, and analogues	Purine nucleosides	-1	-1	-1	337.89981:302 337.98199:234 338.1424:2123341 338.71841:804 338.78223:450 338.8201:781 338.86716:692 338.90982:448 338.98257:496 339.01859:332 339.05695:320 339.14252:697656 339.8028:344 339.85162:373 339.92282:235 339.97318:246 340.06009:493 340.14566:88147 340.6478:820 341.14801:8543 341.6394:269 342.15204:564 343.11743:401		969.105
Berberine	7.08388	336.126	1965311	13348430	80004.8	[M]+	Postive	YBHILYKTIRIUTE-UHFFFAOYSA-N	Alkaloids and derivatives	Protoberberine alkaloids and derivatives	775.977	791.673	857.143	335.92596:266 336.12625:2003153 336.686:423 336.72485:330 336.79938:370 336.87057:307 336.93439:321 337.12683:602177 337.70026:282 337.78256:267 337.89603:292 337.96191:258 338.13:73965 338.34137:2384 339.0437:238 339.13211:7446 339.34381:748 340.13266:630	292.09558:778 294.10919:230 306.07431:335 308.12656:1104 309.12946:336 320.09067:1385 320.12561:368 321.09848:2208 322.10391:682 336.12259:7460	859.15
Choline	0.693717	104.108	1000852	7716431	46249	[M]+	Postive	OEYIOHPDSNJKLS-UHFFFAOYSA-N	Organic nitrogen compounds	Organonitrogen compounds	666.674	715.559	1000	104.07108:8187 104.10819:1759837 104.42992:232 104.45406:267 104.5013:392 104.54202:363 104.58121:376 104.61952:256 104.68869:351 104.75307:339 104.85458:234 104.86843:217 104.89381:387 105.07544:704 105.11062:102309 105.45403:212 106.04984:947 106.08636:1995 106.11215:5961 106.94997:305 107.0439:582 107.11417:301 109.02887:620	58.06517:33098 58.09335:1050 59.07291:10367 59.101:256 60.08077:128891 61.08418:5946 86.09665:521 88.07536:339 104.10724:34954	875.116
Daidzein-8-C-glucoside	4.428	415.103	360725	3396548	20357.5	[M-H]-	Negative	HKEAFJYKMMKDOR-UHFFFAOYNA-N	Phenylpropanoids and polyketides	Isoflavonoids	913.073	948.229	933.333	415.10336:779617 415.71536:231 415.77573:313 415.81995:274 415.88153:222 415.98224:350 416.10721:170621 416.9581:292 417.04666:224 417.10941:30730 417.32391:226 417.53976:201 418.11087:5181 419.116:499	59.01402:759 117.03261:229 133.02911:257 193.06593:299 209.06079:250 221.06058:728 222.06696:381 223.07407:590 224.04787:554 224.07751:275 238.06238:315 253.04987:1141 254.05493:201 265.04922:497 266.05786:264 267.0658:20802 268.06927:4972 269.06985:370 277.05023:2442 278.05206:783 279.06418:368 293.04373:272 295.06088:2315 296.06476:421 307.06113:337	869.74
Oleic acid	14.9407	281.248	285330	3292499	19733.8	[M-H]-	Negative	ZQPPMHVWECSIRJ-UHFFFAOYSA-N	Lipids and lipid-like molecules	Fatty Acyls	738.994	738.994	1000	281.24823:470703 281.75497:216 281.88675:221 281.99289:350 282.02832:307 282.05051:401 282.15189:210 282.20328:318 282.25223:82019 283.08783:248 283.13638:292 283.25537:9372 284.258:625	281.24832:31437 281.30887:760	888.061
Puerarin	4.4782	417.119	476272	3247243	19462.6	[M+H]+	Postive	HKEAFJYKMMKDOR-VPRICQMDSA-N	Phenylpropanoids and polyketides	Isoflavonoids	866.087	803.633	640	417.11902:766369 417.7438:325 417.78687:328 417.86841:296 418.12225:167132 418.72702:327 419.12457:28108 420.12756:3633 420.18549:469 421.12982:470	93.03078:225 119.05042:261 163.03517:250 223.07507:271 225.0876:222 239.07201:544 240.07808:335 267.06534:4329 268.07327:2676 269.07983:596 270.08105:238 279.06561:559 280.07053:404 281.08139:1040 282.08206:260 293.08054:291 295.06281:237 297.07645:3105 298.07965:1073 307.09766:1010 308.10107:204 309.07355:254 321.07632:656 363.08582:303 381.10019:226	818.517
5(S)-5-carboxystrictosidine; PlaSMA ID-2904	5.53163	575.223	390403	3033324	18180.5	[M+H]+	Postive	LHKZIVMTXZLOTP-UHFFFAOYNA-N	Lipids and lipid-like molecules	Prenol lipids	783.515	781.62	923.077	575.0415:266 575.22321:770178 576.04309:349 576.22626:241749 576.9411:272 577.02094:240 577.22913:50610 577.82318:210 577.91052:219 578.13928:248 578.23151:8537 578.36249:245 579.2348:1448	57.0323:292 73.02791:258 85.0276:1817 97.02724:427 103.03563:226 109.02905:218 115.05273:203 123.04494:282 126.05305:207 127.03798:654 130.06378:1084 131.03247:225 132.07985:378 139.03772:793 144.08025:3213 145.04803:473 145.08371:491 146.0601:257 151.03757:275 155.06943:236 156.08:510 158.09669:486 163.03496:239 165.05357:3666 166.05832:415 168.08023:717 169.07809:309 173.10486:236 183.06244:267…	860.153
FA 18:2+1O; PlaSMA ID-574	10.3918	295.228	288406	3002772	17997.3	[M-H]-	Negative	NPDSHTNEKLQQIJ-UHFFFAOYNA-N	Lipids and lipid-like molecules	Fatty Acyls	705.148	766.898	714.286	295.22751:649678 295.87524:215 296.12268:221 296.23129:121521 297.15588:273 297.23364:12776 298.2352:1827 299.05371:308	59.01347:883 113.09716:419 155.10641:284 171.10287:1754 172.1049:300 177.12877:467 181.12372:238 183.10245:1025 195.13826:8707 196.14227:1689 197.14693:260 251.23582:211 275.19873:263 277.21664:11374 277.27768:211 278.22025:2092 293.21237:262 295.22739:15469	787.441
Palmatine; PlaSMA ID-1936	7.1406	352.154	262641	2664399	15969.3	[M]+	Postive	QUCQEUCGKKTEBI-UHFFFAOYSA-N	Alkaloids and derivatives	Protoberberine alkaloids and derivatives	876.871	826.771	500	352.15439:277201 353.15784:60457 354.16046:7779 355.1647:937 357.12402:251	292.09589:353 308.12766:1790 309.13293:354 320.08899:487 320.12659:332 322.10672:1482 323.17532:2709 336.12128:3137 337.1297:6635 338.13379:1213 352.15408:22098	995.826
Voacristine	5.44913	385.213	287333	2308325	13835.1	[M+H]+	Postive	OYMQKBZMKFJPMH-VJMPXSKLSA-N	Alkaloids and derivatives	Ibogan-type alkaloids	527.742	728.86	500	385.21289:657697 385.91394:343 386.00983:245 386.08331:255 386.21625:144495 387.21918:21400 387.32193:298 388.14795:208 388.22137:1976 389.11847:300 389.15652:282 389.2294:373 390.15552:754	110.0962:323 136.11174:215 182.09645:245 184.07327:232 194.05948:406 220.11107:1161 222.09035:213 222.12836:337 232.11034:683 238.08797:357 248.10658:347 250.12297:1146 251.12526:240 258.12802:302 260.10715:249 266.11581:440 268.13022:383 274.12299:332 278.11713:388 278.17307:216 280.13168:507 292.13217:569 310.14127:1948 311.1431:380 318.14603:293 337.185:337 367.20224:1102 368.20383:415 385.212…	995.434
(E)-3-[2,4-dihydroxy-5-(2-methylbut-3-en-2-yl)phenyl]-1-(4-methoxyphenyl)prop-2-en-1-one	10.7737	339.159	244036	2223289	13325.4	[M+H]+	Postive	TZHSNGXLLUGMMD-DHZHZOJOSA-N	Phenylpropanoids and polyketides	Linear 1,3-diarylpropanoids	746.102	372.992	428.571	339.15924:520379 339.74167:247 339.91306:261 340.16284:117156 341.1369:2365 341.16498:18397 342.16544:1417 342.26682:305 343.1543:202	55.05347:217 65.03892:4454 69.06996:2008 79.05348:208 85.02881:213 93.03365:11359 94.03654:801 103.05446:244 107.04868:2389 119.04809:355 121.02849:41012 121.06871:1410 122.03148:4063 123.0405:285 131.04826:229 133.06403:280 146.07317:287 147.04366:835 147.08006:211 161.05965:307 162.06265:400 165.0681:237 177.05345:800 181.06454:254 182.06931:269 187.07616:385 188.08083:291 199.07399:280 203.069…	992.993
3-Caffeoylquinic acid	1.90085	353.088	72589.2	2220304	13307.6	[M-H]-	Negative	CWVRJTMFETXNAD-UHFFFAOYNA-N	Organic oxygen compounds	Organooxygen compounds	703.818	808.173	1000	353.08789:74870 354.09048:12499 355.09265:1890 356.09698:206	179.03424:1703 191.05585:16552 191.10625:354 192.05927:2324	905.606
Isocorydine; PlaSMA ID-1885	4.4558	342.17	291066	2135330	12798.3	[M+H]+	Postive	QELDJEKNFOQJOY-UHFFFAOYNA-N	Alkaloids and derivatives	Aporphines	-1	-1	-1	342.16977:564533 342.88974:267 343.07031:234 343.17334:109846 344.10956:219 344.17566:14704 345.17892:1419	192.10121:1823	955.205
Oleanolic acid	14.3678	455.353	183676	1856597	11127.7	[M-H]-	Negative	MIJYXULNPSFWEK-UHFFFAOYSA-N	Lipids and lipid-like molecules	Prenol lipids	747.321	747.499	500	454.92554:2458 455.23529:478 455.35269:427380 456.09912:249 456.35657:128240 456.92133:1866 457.2627:505 457.35938:20978 457.91187:577 458.26376:222 458.36298:2640 458.91934:1109 459.04486:220 459.34521:537 459.36743:397 459.90225:678 460.33005:529	59.01314:378 455.35208:13675	994.796
FA 18:2+O; PlaSMA ID-565	10.7625	293.212	96178.6	1688079	10117.6	[M-H]-	Negative	HKSDVVJONLXYKL-UHFFFAOYNA-N	Lipids and lipid-like molecules	Fatty Acyls	665.437	810.693	500	293.08109:237 293.21225:113968 294.21548:23106 295.2197:3925 296.22739:435 297.03784:364 297.14929:563 297.2428:12650 298.15015:231	185.11696:788 293.21173:1542	993.983
Protocatechuic aldehyde	3.78778	137.024	60209.3	1286684	7711.84	[M-H]-	Negative	IBGBGRVKPALMCQ-UHFFFAOYSA-N	Organic oxygen compounds	Organooxygen compounds	849.731	908.07	833.333	137.02446:73415 138.02773:7423 139.02858:581 139.87206:366 141.01656:9079 141.86848:3933 142.02254:334	53.03929:541 81.03529:359 91.01913:543 92.02682:856 108.02155:1200 109.02969:267 119.0139:568 136.01608:2317 137.02402:6290	851.157
13E-Docosenamide	17.3227	338.343	1231658	1195866	7167.51	[M+H]+	Postive	UAUDZVJPLUQNMU-KTKRTIGZSA-N	Lipids and lipid-like molecules	Fatty Acyls	933.531	822.927	666.667	338.14371:220 338.16724:205 338.2233:471 338.34341:1316782 338.91159:422 338.97702:398 339.03403:254 339.077:223 339.15424:358 339.23669:273 339.34586:321170 340.04102:212 340.06989:286 340.34946:35216 341.35184:2846 341.94055:207 342.35052:236	53.03885:313 55.01786:1602 55.05443:20195 55.08155:595 56.05761:1068 57.03394:242 57.06999:15946 57.0977:424 58.07269:1280 67.05396:3034 69.03398:452 69.07011:15630 70.07355:2090 71.04916:413 71.08553:4326 72.04395:816 72.08144:1287 77.03857:323 79.05453:2008 81.06992:4328 82.07099:564 83.04847:564 83.08545:6417 84.08861:658 85.10053:619 86.06026:2362 86.09583:484 88.07519:326 91.05445:797 93.069…	763.55
4-Hydroxybenzaldehyde	4.76493	121.029	124322	1188627	7124.12	[M-H]-	Negative	RGHHSNMVTDWUBI-UHFFFAOYSA-N	Organic oxygen compounds	Organooxygen compounds	958.313	948.118	857.143	121.0293:314112 122.03279:20801 123.00854:535 123.03463:1456 123.90184:2859 125.02282:297 125.03962:201 125.89853:1122	65.03851:263 91.01817:2325 92.02685:15113 93.03418:1906 94.03589:255 120.02107:4084 121.02921:17382	857.096
Sissotrin	4.56278	445.114	114740	1073299	6432.9	[M-H]-	Negative	LFEUICHQZGNOHD-RECXWPGBSA-N	Phenylpropanoids and polyketides	Isoflavonoids	-1	-1	-1	444.95789:227 445.11395:252607 446.11771:61525 447.11932:12352 447.22079:504 448.12415:1387 449.11966:405 449.16574:5846 449.23856:559 450.1037:5109	132.02122:204 237.05623:297 238.06468:297 253.04976:345 268.03622:225 281.04465:442 282.05295:5215 283.05762:1154 292.03592:272 293.04211:226 297.03983:277 297.07532:431 307.05865:425 310.04776:1798 325.0723:610 340.05588:232	855.852
Equol	7.89833	241.087	111314	1066229	6390.52	[M-H]-	Negative	ADFCQWZHKCXPAJ-UHFFFAOYNA-N	Phenylpropanoids and polyketides	Isoflavonoids	-1	-1	-1	241.08655:255322 242.08994:35341 242.78462:210 243.09305:3622 244.09355:389 244.11142:201	198.06915:507 226.06404:1202	809.895
L-(-)-Malic acid	0.65405	133.014	105567	1053687	6315.35	[M-H]-	Negative	BJEPYKJPYRNKOW-REOHCLBHSA-N	Organic acids and derivatives	Hydroxy acids and derivatives	-1	-1	-1	133.01433:180939 134.01765:8099 135.02722:4220 135.9696:532 136.00568:225 136.9921:287	107.03558:332	992.067
Pseudocopsinine; PlaSMA ID-1861	6.67135	339.207	117949	1050965	6299.04	[M+H]+	Postive	CZLWGXKWXLVFJU-UHFFFAOYNA-N	Alkaloids and derivatives	Aspidospermatan-type alkaloids	-1	-1	-1	339.10876:2284 339.14041:4344 339.20651:239027 340.11148:653 340.14255:485 340.20993:51434 341.13626:713 341.21179:6651 342.16275:306 342.21478:745 343.15271:612 343.18716:333		932.11
Flavone base + 2O, 1MeO, C-Hex; PlaSMA ID-2438	4.6082	447.129	126295	1046095	6269.85	[M+H]+	Postive	ABRULANJVVJLFI-UHFFFAOYNA-N	Phenylpropanoids and polyketides	Flavonoids	-1	-1	-1	447.1293:316550 448.13318:69754 449.05176:228 449.13501:11459 450.13748:1571 451.16464:238	297.07516:1526 298.07928:365 309.07391:281 311.09341:278 327.08731:9953 328.09076:1689 329.09232:216 337.10645:763 338.112:222 351.08661:2095 352.08887:292 357.09595:518 365.10434:908 381.0972:2924 382.10001:771 383.10205:266 393.09824:1899 394.10083:764 411.10803:5822 412.1123:1484 429.11877:6739 430.12277:2127 431.12213:515 447.12939:6035	877.325
Triacetyl resveratrol; PlaSMA ID-836	10.594	353.103	96545.1	984941	5903.32	[M-H]-	Negative	PDAYUJSOJIMKIS-UHFFFAOYSA-N	Phenylpropanoids and polyketides	Stilbenes	-1	-1	-1	353.0022:423 353.10294:185521 353.99564:204 354.10577:37464 355.10858:7361 355.17041:368 355.95856:215 356.11371:638 357.17551:205	150.03091:379 218.09676:229 245.08163:346 338.11349:247 353.10236:1176	942.925
Lapachol; LC-ESI-QTOF; ; [M-H]-; CE	8.63968	241.087	96852.9	969628	5811.54	[M-H]-	Negative	CIEYTVIYYGTCCI-UHFFFAOYSA-N	Lipids and lipid-like molecules	Prenol lipids	-1	-1	-1	241.04037:282 241.0867:217657 242.04137:242 242.08995:33475 242.16965:463 242.99887:257 243.02727:244 243.05:359 243.09308:3873 244.09528:382	197.05858:239 198.06766:268 226.06261:3145 227.06602:525 241.08495:226	977.413
Licodione base + 2Prenyl; PlaSMA ID-1036	12.4472	407.186	72334	954097	5718.45	[M-H]-	Negative	FFPFIAFZJXSGDK-UHFFFAOYSA-N	Phenylpropanoids and polyketides	Linear 1,3-diarylpropanoids	756.832	706.682	500	407.09912:280 407.18613:144492 408.18912:34242 409.19165:5984 409.30011:338 410.19421:753	59.01304:265 68.99516:213 161.09688:1792 177.09138:415 185.09685:474 187.11415:229 201.09059:572 219.0638:689 219.10088:244 220.06905:345 230.08476:272 245.08116:2564 246.08856:361 407.18668:572	993.717
NCGC00380251-01	7.89833	415.139	73891.4	909810	5453.01	[M-H]-	Negative	BADPZPNBPIOSER-UHFFFAOYNA-N	Organoheterocyclic compounds	Naphthofurans	-1	-1	-1	415.1395:60155 416.14276:14572 417.15094:3448 418.1142:13309 419.11652:3724 420.12323:636	59.01349:1432	645.132
(E)-1,7-bis(4-hydroxyphenyl)hept-4-en-3-one	5.0754	314.175	103314	907250	5437.67	[M+H]+	Postive	GIKJADRKBZHVCY-UHFFFAOYSA-N	Phenylpropanoids and polyketides	Diarylheptanoids	-1	-1	-1	314.10733:381 314.17508:238565 315.13287:223 315.17865:43646 315.40158:249 316.0907:210 316.12387:237 316.18112:5650 317.1832:529 318.29623:293 319.09692:270 319.11133:217		973.461
FA 18:3+1O; PlaSMA ID-1517	12.796	295.227	54975	896852	5375.35	[M+H]+	Postive	LUZSWWYKKLTDHU-UHFFFAOYSA-N	Lipids and lipid-like molecules	Fatty Acyls	-1	-1	-1	295.22665:32224 296.22983:6382 297.23209:652 298.23871:208 299.18011:599	53.03841:2157 55.01871:601 55.05418:1635 57.03406:214 57.06935:438 67.05418:1656 69.06945:934 79.05437:587 81.03318:2208 81.06942:1315 82.07298:312 83.04943:599 91.05334:695 93.07024:290 95.04926:459 105.06935:291 107.08473:244	876.053
trans-pterostilbene	10.3244	255.102	94297.5	884186	5299.44	[M-H]-	Negative	VLEUZFDZJKSGMX-UHFFFAOYSA-N	Phenylpropanoids and polyketides	Stilbenes	-1	-1	-1	255.02547:238 255.1022:235130 256.10562:36148 257.06171:340 257.10873:3800 258.11276:241 260.06705:302	141.07042:211 143.05008:665 168.0576:610 169.06546:2155 179.05008:415 180.05402:539 195.04504:2114 196.05296:2720 197.0609:29009 197.11209:813 198.06422:3980 199.06734:766 225.05605:1216 226.05753:406	977.976
(3R,5S)-4-[(E)-3-(3,4-dihydroxyphenyl)prop-2-enoyl]oxy-1,3,5-trihydroxycyclohexane-1-carboxylic acid	2.8106	353.088	53377	870790	5219.14	[M-H]-	Negative	GYFFKZTYYAFCTR-UHFFFAOYNA-N	Organic oxygen compounds	Organooxygen compounds	899.391	840.712	750	353.08755:57293 354.09082:8435 355.09467:1888 356.09561:205	93.03329:316 135.04514:1167 137.02496:444 173.04507:3858 174.05011:541 179.03334:2040 180.03799:443 191.0551:2752	793.449
Bindarit	7.1406	347.139	112415	867383	5198.72	[M+H]+	Postive	MTHORRSSURHQPZ-UHFFFAOYSA-N	Organoheterocyclic compounds	Benzopyrazoles	-1	-1	-1	347.1391:131720 348.14255:27815 349.14734:4702 349.22943:243 350.15103:514 351.13416:224 351.16254:314	165.0549:521 166.05795:259 182.0844:337 204.07291:206 245.1059:610 246.11174:235 287.11426:558 315.11331:1056 347.13879:5549	902.621
Pseudouridine	8.87552	243.102	88375.4	819820	4913.65	[M-H]-	Negative	PTJWIQPHWPFNBW-GBNDHIKLSA-N	Nucleosides, nucleotides, and analogues	Nucleoside and nucleotide analogues	-1	-1	-1	243.03:342 243.10237:231696 244.10559:34195 244.16563:875 245.02739:286 245.10855:4337 246.11284:209	227.06981:221	949.922
(E)-1-[2,4-dihydroxy-6-methoxy-3-(3-methylbut-2-enyl)phenyl]-3-(4-hydroxyphenyl)prop-2-en-1-one	9.81902	353.139	55335.8	778329	4664.97	[M-H]-	Negative	ORXQGKIUCDPEAJ-UHFFFAOYSA-N	Phenylpropanoids and polyketides	Linear 1,3-diarylpropanoids	-1	-1	-1	353.03119:415 353.13931:83045 354.10278:476 354.14224:18743 354.21066:413 355.08096:229 355.11807:1457 355.14511:2979 356.12216:492 357.16635:210	150.03162:2103 151.03531:252 259.061:223 284.06955:247 295.05835:282 338.11493:1024 353.13736:748	939.029
3-hydroxy-7-(4-hydroxyphenyl)-2-(2-hydroxypropan-2-yl)-2,3,6,7-tetrahydrofuro[3,2-g]chromen-5-one	0.75515	401.127	81718.7	727209	4358.58	[M-H]-	Negative	JVJTUAXBSFDCFS-UHFFFAOYNA-N	Phenylpropanoids and polyketides	Flavonoids	-1	-1	-1	401.12695:241945 402.08292:404 402.1304:35338 402.74731:253 403.13254:7897 403.97702:294 404.10184:67815 405.1051:9925 405.17947:270 406.10663:2395		765.841
Formononetin	8.90328	269.081	80081.4	722408	4329.8	[M+H]+	Postive	HKQYGTCOTHHOMP-UHFFFAOYSA-N	Phenylpropanoids and polyketides	Isoflavonoids	682.446	726.74	500	269.00262:213 269.08066:178627 270.08398:30653 270.14389:710 271.09113:4574 271.15353:207 272.09787:314 272.97092:244 273.10736:268 273.14804:240	213.08752:205 269.08002:1640	993.945
L-Valine	0.756	118.086	80811.7	696283	4173.22	[M+H]+	Postive	KZSNJWFQEVHDMF-BYPYZUCNSA-N	Organic acids and derivatives	Carboxylic acids and derivatives	-1	-1	-1	118.05138:515 118.08635:141533 119.0443:229 119.0897:7352 119.12846:217 120.066:922 120.09688:978 121.05091:2090 122.03921:269 122.05486:218 123.04461:204 123.06435:508		846.328
5,7-dihydroxy-2-phenyl-6-[3,4,5-trihydroxy-6-(hydroxymethyl)oxan-2-yl]-8-(3,4,5-trihydroxyoxan-2-yl)chromen-4-one	4.54588	549.16	78374.1	686492	4114.54	[M+H]+	Postive	ZGVGUTOTMNVHSX-UHFFFAOYNA-N	Phenylpropanoids and polyketides	Flavonoids	-1	-1	-1	549.16052:177483 550.16418:44354 551.16626:8447 551.25836:298 552.1676:2035 552.21716:249 553.19067:468	297.07782:337 399.10596:271 417.12015:473 549.15778:346	990.503
Flavanole base + 2O, 2Prenyl; PlaSMA ID-1039	13.1548	407.186	30580	669635	4013.51	[M-H]-	Negative	LAQLCZKPJGMFRM-UHFFFAOYNA-N	Phenylpropanoids and polyketides	Flavonoids	522.763	839.048	416.667	407.18585:30243 408.14679:214 408.18896:7239 409.16177:746 409.18948:1205 409.29172:356 410.18588:289	160.08522:218 161.09752:575 177.09015:302 185.09625:460 201.09091:514 203.07028:2180 203.10748:3323 204.10939:486 229.08488:483 245.08148:2337 246.08485:366 390.73346:211 407.18591:514	992.362
N-(2,6-Dimethylphenyl)-N-(2-furanylcarbonyl)-DL-alanine methyl ester	5.61193	324.124	60792.9	626877	3757.23	[M+H]+	Postive	CIEXPHRYOLIQQD-UHFFFAOYNA-N	Benzenoids	Benzene and substituted derivatives	-1	-1	-1	324.12393:84120 325.12698:18103 326.09998:278 326.12857:2455 326.60184:356 327.11066:1151 327.20398:496 327.61221:516 328.12082:262 328.1922:893	281.10474:225 309.09854:916 310.10336:344 324.12152:6327	983.876
Trimipramine N-Oxide	5.86113	311.212	69473.6	602477	3610.99	[M+H]+	Postive	UNOPAPJVNIQNJP-UHFFFAOYSA-N	Organoheterocyclic compounds	Benzazepines	-1	-1	-1	311.08939:304 311.12552:412 311.21146:162284 312.1853:274 312.21475:35407 312.57718:357 313.21786:4045 313.26947:299 314.2178:494 315.12799:338 315.1662:320 315.22571:252 316.11655:860 316.2067:339		974.693
Anthraquinone base + 1O, MeOH, O-Hex-Pen; PlaSMA ID-1499	4.49538	547.146	60694.8	597800	3582.96	[M-H]-	Negative	BMOUMJCDDOLCGR-UHFFFAOYNA-N	Benzenoids	Anthracenes	-1	-1	-1	547.14581:178735 548.1488:48227 549.15045:8880 550.15509:1834 550.25641:207	296.06448:279 547.14465:371	977.975
Hirsuteine	5.61193	367.202	60853.1	595943	3571.83	[M+H]+	Postive	TZUGIFAYWNNSAO-AZQGJTAVSA-N	Alkaloids and derivatives	Corynanthean-type alkaloids	471.994	724.634	500	367.13596:270 367.20236:140873 367.9816:211 368.12039:369 368.20532:30203 369.11017:215 369.20853:3738 370.12732:1404 370.21103:776 371.14441:547 371.20688:5634	156.08112:208 180.10124:451 206.11852:334 310.1051:216 324.12149:746 367.20203:2271	996.841
Licoricesaponin H2	6.1801	821.397	47532.3	576488	3455.23	[M-H]-	Negative	LPLVUJXQOOQHMX-UHFFFAOYNA-N	Lipids and lipid-like molecules	Prenol lipids	750	750	1000	821.22052:327 821.39697:118984 822.30328:20365 822.40009:59399 823.30713:7889 823.40143:17599 824.24792:209 824.31:2178 824.40521:3379 825.3125:762 825.41077:636	821.39496:6302	898.729
[5-[4-(3,4-dihydroxyphenyl)-2,3-dimethylbutyl]-2-hydroxyphenyl] 4-hydroxybenzoate	13.0201	421.165	45289.8	538188	3225.67	[M-H]-	Negative	ORMBYUPZHHWUEM-UHFFFAOYNA-N	Phenylpropanoids and polyketides	Depsides and depsidones	-1	-1	-1	421.08725:244 421.16525:72102 422.168:15408 423.17191:3528 423.30798:420 424.17563:637	193.08752:1238 194.0892:602 421.16541:242	938.93
Dimethachlor	10.2441	256.109	56515.6	535327	3208.52	[M+H]+	Postive	SCCDDNKJYDZXMM-UHFFFAOYSA-N	Benzenoids	Benzene and substituted derivatives	-1	-1	-1	256.10928:110585 257.08191:410 257.11664:90539 258.11981:14388 259.12192:1005 259.20563:241 260.12646:249 260.16467:288	199.07497:272 213.09178:229 241.08302:278	968.155
Isoflavone base + 3O, 1Prenyl; PlaSMA ID-766	10.2233	337.108	39748.1	516062	3093.06	[M-H]-	Negative	KIMDVVKVNNSHGZ-UHFFFAOYSA-N	Phenylpropanoids and polyketides	Isoflavonoids	-1	-1	-1	337.0405:413 337.10785:70203 337.69131:221 337.90421:674 338.11118:13767 339.12253:7841 339.9064:220 340.1257:1419 341.13135:511	93.03414:545 109.02803:773 161.02357:284 167.03432:282 176.01022:209 201.09282:464 245.08163:1487 248.97475:250 337.10739:1475	801.615
N-[4,5-dihydroxy-2-[[4-[hydroxy(phenyl)methyl]-5-oxo-3-phenyl-2H-furan-2-yl]oxy]-6-(methoxymethyl)oxan-3-yl]acetamide	5.13768	500.192	60535.5	506310	3034.61	[M+H]+	Postive	UCFGUMMLHWLLKJ-UHFFFAOYNA-N	Organic oxygen compounds	Organooxygen compounds	-1	-1	-1	500.19217:165472 501.19516:42036 502.19772:8340 503.14948:248 503.19937:1239 504.19559:331 504.21692:256 505.15659:289		973.17
FA 18:2+1O; PlaSMA ID-573	11.5375	295.227	24711	500939	3002.42	[M-H]-	Negative	HNICUWMFWZBIFP-UHFFFAOYNA-N	Lipids and lipid-like molecules	Fatty Acyls	-1	-1	-1	295.22714:38189 296.23044:6403 297.23538:1088 299.08023:245 299.22238:501 299.25812:874	295.22705:2006	963.793
Chalcone base + 3O, 1MeO, 1Prenyl; PlaSMA ID-839	10.257	353.14	41460.9	497729	2983.18	[M-H]-	Negative	RETRVWFVEFCGOK-UHFFFAOYSA-N	Phenylpropanoids and polyketides	Linear 1,3-diarylpropanoids	-1	-1	-1	353.13968:87646 354.14249:20810 355.08099:339 355.11761:1352 355.15289:9827 356.1217:356 356.15732:1479 357.08652:219 357.16068:347 358.09512:227	65.00242:265 124.01516:283 150.03098:630	962.076
Apigenin-8-C-glucoside	4.01977	433.113	53755	481411	2885.38	[M+H]+	Postive	SGEWCQFRYRRZDC-VPRICQMDSA-N	Phenylpropanoids and polyketides	Flavonoids	-1	-1	-1	433.11346:117660 434.11703:25736 435.11884:4393 435.20468:272 436.1203:332	131.04898:235 163.07367:622 253.11978:214	968.939
Nefiracetam (Translon)	3.98863	247.143	52122.8	472056	2829.3	[M+H]+	Postive	NGHTXZCKLWZPGK-UHFFFAOYSA-N	Organic acids and derivatives	Carboxylic acids and derivatives	-1	-1	-1	247.14331:112100 247.95859:270 248.09615:250 248.14616:16171 249.15211:1937 250.15889:282		910.04
Gestoden	12.5157	311.2	30149.7	461470	2765.86	[M+H]+	Postive	SIGSPDASOTUPFS-UHFFFAOYNA-N	Lipids and lipid-like molecules	Steroids and steroid derivatives	-1	-1	-1	311.20053:38190 312.16278:264 312.2038:9436 313.21518:5963 314.21844:1290 314.2695:489 314.33987:249 315.19177:471 315.22711:314	81.06926:383 93.07029:387 155.08519:251 209.13034:276	969.261
3-(2,5-dihydroxy-6-methyl-3-propan-2-ylphenyl)-2-methyl-5-propan-2-ylbenzene-1,4-diol	6.55068	375.181	31658.9	448766	2689.71	[M-H]-	Negative	QYNCIWOOLDANTG-UHFFFAOYSA-N	Benzenoids	Benzene and substituted derivatives	-1	-1	-1	375.18124:78960 376.13556:344 376.18411:16030 376.25607:262 377.11011:495 377.14261:2063 377.18729:2926 377.64752:886 378.14664:351 378.18747:523	59.01334:449 133.03004:258 173.0984:413 174.10558:268 228.1517:745 229.16045:223	960.594
Silodosin (Rapaflo)	5.73653	518.225	47559.1	430555	2580.56	[M+NH4]+	Postive	PNCPYILNMDWPEY-QGZVFWFLSA-N	Organoheterocyclic compounds	Indoles and derivatives	-1	-1	-1	518.13892:3416 518.22522:96470 519.15057:1165 519.22827:22910 520.17133:2451 520.22919:4724 520.67249:1516 521.16858:2816 521.2298:894 522.1651:759 522.20953:912 522.29254:538 523.18018:44023	207.09955:470	947.554
Santonin	10.8649	247.133	41829.7	430242	2578.69	[M+H]+	Postive	XJHDMGJURBVLLE-UHFFFAOYSA-N	Lipids and lipid-like molecules	Prenol lipids	-1	-1	-1	247.13295:52644 247.89384:224 248.13568:9841 249.13858:766 249.15446:545 249.18192:265 250.17603:650 250.21686:274 252.10043:263	139.03859:288 159.07985:603	985.594
8-OXO-PSEUDOPALMATINE	6.76477	368.15	33649.8	425166	2548.27	[M+H]+	Postive	RNYYLJRCLSSAOZ-UHFFFAOYSA-N	Organoheterocyclic compounds	Isoquinolines and derivatives	-1	-1	-1	368.14972:75959 369.08716:227 369.11655:334 369.15323:17351 369.22067:964 370.15637:3019 371.10825:302 371.15582:833 371.18863:312 372.14072:456 373.13367:367		964.546
Feruloyl quinic acid (isomer of 886, 888); PlaSMA ID-887	3.24862	367.103	31078.8	403067	2415.81	[M-H]-	Negative	VTMFDSJJVNQXLT-UHFFFAOYNA-N	Organic oxygen compounds	Organooxygen compounds	822.483	793.562	428.571	367.03146:289 367.10336:47733 368.10632:9586 369.10803:1297 371.06284:218	93.03594:871 111.04395:332 173.04451:712 191.0558:6118 192.05727:360 193.05095:807	993.118
Genistin	3.95632	431.099	40484.1	396614	2377.14	[M-H]-	Negative	ZCOLJUOHXJRHDI-CMWLGVBASA-N	Phenylpropanoids and polyketides	Isoflavonoids	-1	-1	-1	431.09894:94105 432.10181:21052 433.10385:4239 434.10626:520 434.1405:406	255.06607:437 283.06165:2638 284.06747:443 293.04507:252 311.05554:283	990.317
Rosmarinic acid (not validated); PlaSMA ID-309	4.08207	163.039	28809	391391	2345.83	[M+H-C9H10O5]+	Postive	DOUMFZQKYFQNTF-UHFFFAOYNA-N	Phenylpropanoids and polyketides	Cinnamic acids and derivatives	799.877	837.738	666.667	163.03856:55342 164.04172:3888 165.04431:587 165.06354:305 165.09023:364 166.08757:460 166.12257:739 167.07089:1471 167.11272:254	77.03808:202 89.03791:1580 117.03281:924 135.04272:664 136.04729:260 145.02899:364	705.302
Protopine	5.19997	354.133	42998	391177	2344.55	[M+H]+	Postive	GPTFURBXHJWNHR-UHFFFAOYSA-N	Alkaloids and derivatives	Protopine alkaloids	146.853	728.86	500	354.1333:113550 355.09494:326 355.13651:22562 355.19626:1459 356.05908:211 356.11063:3300 356.13593:3949 356.18436:33382 356.28326:442 357.1347:674 357.18726:6854 358.11472:209 358.16107:626 358.19174:1043	192.10199:12685 193.10524:907 354.13242:1796	993.844
1,2-Cyclohexanediol, 1-methyl-4-(1-methylethenyl)-, 2-benzoate, (1S,2S,4R)-	8.93443	257.153	24111	381437	2286.17	[M+H]+	Postive	KGTUUJMNKKRNKR-VYDXJSESSA-N	Lipids and lipid-like molecules	Prenol lipids	-1	-1	-1	257.08054:515 257.15317:52816 258.15622:10133 258.24274:210 258.59702:372 259.10315:692 259.15787:1105 260.16699:285		797.314
7-(2-aminophenyl)heptanoic acid	2.64943	263.175	24448.7	373470	2238.42	[M+H]+	Postive	ZFXXVVRQQNCNDM-UHFFFAOYSA-N	Lipids and lipid-like molecules	Fatty Acyls	-1	-1	-1	263.13733:506 263.17453:26738 263.23346:494 264.1427:279 264.17773:3641 265.19052:5892 266.19373:1241 267.14444:249		990.47
FA 18:1+1O; PlaSMA ID-584	11.0994	297.243	18744.6	371782	2228.3	[M-H]-	Negative	WBHHMMIMDMUBKC-UHFFFAOYNA-N	Lipids and lipid-like molecules	Fatty Acyls	856.739	859.169	666.667	297.24329:25054 298.24625:4829 299.01541:334 299.25229:742	155.10838:393 279.23309:465 297.24286:1756	785.87
7-Hydroxy-3(4-methoxyphenyl) coumarin	8.87552	267.066	38356.6	363336	2177.68	[M-H]-	Negative	VGYCHSOZFBOOKO-UHFFFAOYSA-N	Phenylpropanoids and polyketides	Isoflavonoids	898.586	910.834	714.286	266.97333:212 267.01813:419 267.06628:92487 268.06934:19017 269.07449:1887 269.11633:474 270.08487:336 271.05942:470 271.095:522	59.01358:279 60.01685:235 91.01369:215 196.0486:217 223.03911:598 224.04713:593 251.03212:295 252.04274:14228 253.04608:2299 267.06583:2147	791.376
19S-Methoxytubotaiwine	5.47372	355.202	38990.3	356776	2138.36	[M+H]+	Postive	LTOOPESWVADEAE-JHOCLNBPSA-N			337.573	436.42	750	355.13721:7083 355.20148:72580 356.04352:249 356.13904:1118 356.20422:14304 357.13849:279 357.20651:2288 358.20975:302 359.11209:220 359.15857:516	58.06549:959 131.04976:208 279.10312:604 280.10721:577 281.07779:278 311.12567:589 323.17487:3138 324.17752:1011 355.20163:1954	797.338
methyl (2S,13bS,14aS,1R,4aR)-2-hydroxy-1,2,3,4,5,8,14,13b,14a,4a-decahydrobenz o[1,2-g]indolo[2,3-a]quinolizinecarboxylate	5.47372	355.202	38990.3	356776	2138.36	[M+H]+	Postive	BLGXFZZNTVWLAY-SCYLSFHTSA-O	Alkaloids and derivatives	Yohimbine alkaloids	-1	-1	-1	355.13751:1025 355.20245:65778 356.14301:378 356.20438:14841 357.13538:300 357.20456:1961 358.14706:263 358.20728:387 358.53943:218	177.07997:546 192.10207:18835 193.1051:1930 337.12384:245 340.1127:984 355.13608:4107	972.511
Abieta-8(14),9(11),12-triene-7,18-diol	12.5157	285.221	22926.2	355669	2131.73	[M+H]+	Postive	PORHOKHIMOFMMH-UHFFFAOYNA-N	Lipids and lipid-like molecules	Prenol lipids	-1	-1	-1	285.11041:235 285.14627:231 285.18161:290 285.22131:31737 285.33276:451 286.22415:7519 287.20273:259 287.22543:1183 288.25217:219 289.21103:262 290.07568:252		948.023
FA 18:3+1O; PlaSMA ID-1318	12.796	277.216	20252.5	344012	2061.86	[M+H]+	Postive	JTEGNNHWOIJBJZ-UHFFFAOYNA-N	Lipids and lipid-like molecules	Fatty Acyls	-1	-1	-1	277.18042:14811 277.21609:24772 278.18292:2668 278.21915:4155 279.09409:367 279.15833:400 279.18637:471 279.2254:1277 281.20926:302 281.22202:249 281.26288:202		755.32
Heptadecanoic acid	15.3787	269.249	29193.4	340042	2038.07	[M-H]-	Negative	KEMQGTRYUADPNZ-UHFFFAOYSA-N	Lipids and lipid-like molecules	Fatty Acyls	880	778.337	500	269.0882:211 269.24878:51197 270.25146:8755 271.25504:945 272.09088:284	269.2489:2320	994.37
130036	5.418	356.186	40558.8	334742	2006.3	[M+H]+	Postive	IWIISBMWNKBQQH-HFPLEIQESA-N	Benzenoids	Phenols	-1	-1	-1	356.14734:1037 356.18634:96004 357.06671:206 357.14801:598 357.18875:22240 358.1908:3510 359.15515:510 359.1951:249 360.15002:211 360.19962:216	296.12363:231 311.12878:216 324.17758:1491 325.18384:247 356.20462:1527	966.122
Liquiritin	5.43882	417.12	36003.9	334600	2005.45	[M-H]-	Negative	DEMKZLAVQYISIA-UHFFFAOYNA-N	Phenylpropanoids and polyketides	Flavonoids	851.797	821.532	666.667	417.11981:92866 417.66675:430 418.1228:19592 419.12579:4414 420.12726:749 420.18549:227 421.11636:385 421.15073:807	135.00743:538 255.06592:4311 256.06842:755 417.11658:287	866.164
6-[(1E,3E,5E)-6-[(2R,3R,3aR,4R,5R,6aS)-2-ethyl-3,4-dihydroxy-3,3a-dimethyl-2,4,5,6a-tetrahydrofuro[2,3-b]furan-5-yl]hexa-1,3,5-trienyl]-4-methoxy-5-methylpyran-2-one	6.16312	419.206	34306.2	329873	1977.12	[M+H]+	Postive	GPXPJKFETRLRAS-AHUKKWBBSA-N	Organoheterocyclic compounds	Furofurans	-1	-1	-1	419.12494:251 419.20602:59159 420.15417:282 420.20917:14247 420.28738:250 421.14627:1100 421.2106:2859 422.14954:562 423.10999:259 423.15942:303 424.16217:262	85.02695:213 201.09334:262 207.09988:232 257.1535:2397 258.15652:932 275.16489:226	982.28
L-(-)-Proline	0.756	116.071	41063.7	322590	1933.47	[M+H]+	Postive	ONIBWKKTOPOVIA-BYPYZUCNSA-N	Organic acids and derivatives	Carboxylic acids and derivatives	-1	-1	-1	116.04558:1582 116.07063:126160 117.05429:2843 117.07367:8051 118.05138:515 118.08635:141533 119.0443:229 119.0897:7352 119.12846:217 120.066:922 120.09688:978 121.05091:2090	55.05345:339 55.93356:469 56.04896:242 58.0645:1513 71.92817:206	936.115
Dexamethasone	11.9239	393.206	36383.4	320559	1921.29	[M+H]+	Postive	UREBDLICKHMUKA-CXSFZGCWSA-N	Lipids and lipid-like molecules	Steroids and steroid derivatives	726.987	873.966	1000	393.20633:82179 394.20908:22300 395.21323:2704 395.27402:346 396.15277:211 397.27206:256	93.03333:687 121.02772:381 131.0125:968 149.02321:13904 149.0676:327 150.02596:1793 151.03706:377 152.06334:257 153.06483:259 196.08519:266	845.148
FA 18:1+3O; PlaSMA ID-735	6.65173	329.233	25576.8	314788	1886.7	[M-H]-	Negative	MDIUMSLCYIJBQC-UHFFFAOYNA-N	Lipids and lipid-like molecules	Fatty Acyls	828.318	609.936	600	329.13528:325 329.23315:35049 330.23611:7837 331.15616:204 331.2395:1163 333.0593:450	211.13361:243 229.14677:335 329.23242:648	999.926
Undecylenate	8.7787	453.337	32691.2	310497	1860.99	[M+H]+	Postive	AHMMSNQYOPMLSX-KEZAGTACSA-N	Lipids and lipid-like molecules	Steroids and steroid derivatives	-1	-1	-1	453.13327:273 453.18488:542 453.33685:66145 454.33969:19276 455.24359:293 455.34329:2446 456.34485:290	123.11537:509 149.13341:216 189.16402:557 241.1937:276 257.18884:207 389.31946:324 407.328:566 435.32556:428 453.3367:8873	878.021
5-hydroxy-7-[4-hydroxy-2-methoxy-3-(3-methylbut-2-enyl)phenyl]-2,2-dimethyl-7,8-dihydropyrano[3,2-g]chromen-6-one	10.9584	437.196	26927.8	307202	1841.24	[M+Na]+	Postive	QJFJALJGKXGWFO-UHFFFAOYNA-N	Phenylpropanoids and polyketides	Isoflavonoids	-1	-1	-1	437.19562:56034 438.19876:14505 439.20459:2393 439.28:316 439.35959:291 440.18436:240 441.20975:357 441.29822:276		956.589
FA 18:2+2O; PlaSMA ID-650	9.04407	311.223	24593.3	301399	1806.46	[M-H]-	Negative	JGUNZIWGNMQSBM-UHFFFAOYNA-N	Lipids and lipid-like molecules	Fatty Acyls	-1	-1	-1	311.22266:54550 312.22629:9845 313.23001:1805	57.0338:238 59.0123:368 139.11267:640 155.10402:232 171.10254:1675 172.10626:255 185.11656:472	690.388
Mangostin	6.2138	409.162	32593.2	300009	1798.13	[M-H]2-	Negative	GNRIZKKCNOBBMO-UHFFFAOYSA-N	Organoheterocyclic compounds	Benzopyrans	-1	-1	-1	409.16156:84681 409.66263:37287 410.05414:215 410.12128:236 410.19345:25251 410.66562:2951 410.69644:12574 410.76953:407 411.12943:889 411.19745:3370 411.7002:1016 412.13339:372 412.15906:225 413.09271:202 413.21246:232		921.144
3-[3-[(2E)-3,7-dimethylocta-2,6-dienyl]-4-hydroxyphenyl]-7-hydroxychromen-4-one	11.8616	391.191	33885.1	296476	1776.95	[M+H]+	Postive	ZBHUUXLHDOUMKM-UHFFFAOYSA-N	Phenylpropanoids and polyketides	Isoflavonoids	-1	-1	-1	391.19095:81361 392.1936:21668 392.31485:213 393.08234:210 393.20233:3875 394.20575:757 394.25522:503 395.27808:965	55.05368:302 65.03843:854 77.03852:220 93.03374:348 121.02833:859 131.0118:816 142.07672:244 149.02318:16779 150.02626:1291 151.03932:1413 252.07518:421 279.06491:1774 280.06812:456 281.07477:217 335.12589:426 336.13232:292	990.149
Formononetin-7-O-glucoside	5.0008	475.126	31945.4	289246	1733.62	[M+FA-H]-	Negative	MGJLSBDCWOSMHL-UHFFFAOYNA-N	Phenylpropanoids and polyketides	Isoflavonoids	465.718	128.299	500	475.12561:89768 476.12888:20958 477.06555:260 477.13052:3892 478.01404:203 478.10046:99454 479.1037:23035 479.20844:412 480.10541:5756	59.01345:1330 61.9882:12282 62.01738:337 196.054:266 208.04889:253 224.04715:496 252.0428:2915 253.05029:10386 254.05264:1719 255.05934:226	994.767
(2S)-3-(3,4-dihydroxyphenyl)-2-[[(E)-3-(3,4-dihydroxyphenyl)prop-2-enoyl]amino]propanoic acid	0.75515	404.102	30107	289226	1733.49	[M-H]-	Negative	GPZFXSWMDFBRGS-UXONFWTHSA-N	Organic acids and derivatives	Carboxylic acids and derivatives	-1	-1	-1	403.97702:294 404.10184:67815 405.1051:9925 405.17947:270 406.10663:2395 409.08163:578	61.98796:8220	969.504
Chalcone base + 3O, 1MeO, 1Prenyl; PlaSMA ID-1980	9.74577	355.154	29676	286645	1718.03	[M+H]+	Postive	RDYZHQQZLIBKBP-UHFFFAOYSA-N	Phenylpropanoids and polyketides	Linear 1,3-diarylpropanoids	-1	-1	-1	355.15436:64238 356.15771:15999 356.24628:211 357.11438:226 357.16022:2557 358.15945:241 359.2182:260		961.723
Rabeprazole	0.756	360.151	34106.8	285992	1714.12	[M+NH4]+	Postive	YREYEVIYCVEVJK-UHFFFAOYSA-N	Organoheterocyclic compounds	Benzimidazoles	-1	-1	-1	360.15082:70514 361.09549:217 361.1535:9292 362.09836:9094 362.15555:3095 362.59918:2415 363.10095:565 363.16031:241 363.60049:395 364.09454:763 365.1062:51278	55.01757:734 57.03311:493 61.02817:589 69.0335:683 73.02835:365 81.03364:213 85.02814:2298 97.02913:592 109.02872:573	989.04
trans-Caffeic acid; PlaSMA ID-201	1.0247	179.035	16627.1	279322	1674.13	[M-H]-	Negative	QAIPRVGONGVQAS-UHFFFAOYSA-N	Phenylpropanoids and polyketides	Cinnamic acids and derivatives	-1	-1	-1	179.03467:19639 180.03755:1878 181.04117:615 181.07013:408 182.01805:296 182.9283:223 182.99257:268	59.01331:205 135.04497:2043	952.62
2-[4-[3-[3,4-dihydroxy-4-(hydroxymethyl)oxolan-2-yl]oxy-4,5-dihydroxy-6-(hydroxymethyl)oxan-2-yl]oxyphenyl]-7-hydroxy-2,3-dihydrochromen-4-one	5.33773	549.162	29865	279280	1673.89	[M-H]-	Negative	FTVKHUHJWDMWIR-UHFFFAOYSA-N	Phenylpropanoids and polyketides	Flavonoids	-1	-1	-1	549.16199:46884 549.19025:28531 550.16602:13208 550.19415:8479 551.12225:322 551.17041:2950 551.19885:1777 552.16882:697 552.20905:309 553.22784:364 553.27069:313 553.67792:255	112.98437:430 119.05045:357 135.00786:337 255.06635:2988 256.06934:272 549.11957:251 549.16162:14873	989.311
MLS001056593-01	9.9638	387.173	31397.3	277931	1665.8	[M+H]+	Postive	IOTXSIGGFRQYKW-UHFFFAOYSA-N	Organoheterocyclic compounds	Azoles	-1	-1	-1	387.17303:68380 388.17648:15101 388.27991:249 389.17883:2744 390.17877:395 391.23135:261		989.309
2,5-bis(4-hydroxyphenyl)-3,6-dimethoxyphenol	7.84435	339.123	25512.9	277586	1663.74	[M+H]+	Postive	YNEMPXKRLPZFAX-UHFFFAOYSA-N	Benzenoids	Benzene and substituted derivatives	-1	-1	-1	339.12277:32807 339.21051:559 339.345:300 340.12558:6949 340.20926:453 340.24997:224 341.12918:884 342.01822:1041 343.0809:339	93.03156:632 105.06995:254 106.07145:221 133.06415:489	988.611
L-PIPECOLIC ACID	0.8183	130.095	30540.6	275238	1649.66	[M+H]+	Postive	HXEACLLIILLPRG-UHFFFAOYSA-N	Organic acids and derivatives	Carboxylic acids and derivatives	-1	-1	-1	129.96886:290 130.01828:533 130.04871:974 130.09445:71644 130.97899:1285 131.03014:527 131.06799:513 131.09383:3772 131.92938:619 131.94791:445 132.06555:298 132.10222:2651 133.04648:747 133.067:992 134.07986:440 134.09338:332 134.11559:403 135.032:370 135.04498:233		970.012
3-[(4-methylphenyl)sulfonyl]-1,2,3,4,5,6-hexahydro-8H-1,5-methanopyrido[1,2-a][1,5]diazocin-8-one, 11-[(4-methylphenyl)sulfonyl]-7,11-diazatricyclo[7.3.1.0<2,7>]trideca-2,4-dien -6-one	7.68862	345.124	28486.2	272771	1634.87	[M+H]+	Postive	IEMDPPNEUUFQGC-UHFFFAOYSA-N	Alkaloids and derivatives	Lupin alkaloids	-1	-1	-1	345.12421:62132 346.12686:15461 346.21997:272 346.97012:222 347.13446:2775 347.18121:906 347.23404:349 348.1467:249 348.18524:234 348.22723:556 349.11874:359 349.19839:597	81.06966:327	998.953
Amlodipine	9.9638	409.155	30118.9	268431	1608.86	[M+Na]+	Postive	HTIQEAQVCYTUBX-UHFFFAOYSA-N	Organoheterocyclic compounds	Pyridines and derivatives	-1	-1	-1	408.93909:238 409.1553:65183 409.24387:2809 410.11697:336 410.15869:11872 410.25235:338 410.62756:306 411.16101:2361 411.24646:897 412.16025:319 412.25018:243 413.26004:460	409.15576:10857 409.24857:795	964.109
9,10-alpha-Epoxy-eremanthin	10.8649	269.115	26269.1	268306	1608.11	[M+Na]+	Postive	JFFHVIUZNPTGGR-UHFFFAOYNA-N	Organoheterocyclic compounds	Lactones	-1	-1	-1	269.11447:33892 269.17215:853 270.08713:255 270.11734:6312 271.09601:310 271.11978:643 271.16751:225 271.18683:212 273.13293:257		658.014
Gibberellin A9	6.55068	315.16	19224.4	268152	1607.19	[M-H]-	Negative	MHVYWTXXZIFXDT-YGNOGLJPSA-N	Lipids and lipid-like molecules	Prenol lipids	-1	-1	-1	315.16025:47432 316.12772:305 316.16379:10398 317.16299:1059 319.03815:265 319.12906:716 319.14935:456	228.15289:206	890.953
a-Linolenic acid (NMR)	13.4244	277.217	15358.4	266394	1596.65	[M-H]-	Negative	DTOSIQBPPRVQHS-PDBXOOCHSA-N	Lipids and lipid-like molecules	Fatty Acyls	880	769.459	500	277.21698:24267 277.27795:464 278.2204:4695 279.22513:898 281.04218:340 281.1066:278 281.24622:399	277.21619:858	993.574
D-(-)-Quinic acid	1.93455	191.055	14847.5	266136	1595.11	[M-H]-	Negative	AAWZDTNXLSGCEK-WYWMIBKRSA-N	Organic oxygen compounds	Organooxygen compounds	504.325	597.411	1000	191.03191:270 191.05544:17334 191.1058:288 191.85493:996 192.0618:697 192.95972:562 195.81:582 195.90561:785	85.02927:776 93.03456:371 127.04035:210 191.05577:232	890.763
Isoflavone base + 4C, 1Prenyl; PlaSMA ID-1973	7.31485	355.118	28472.3	265230	1589.67	[M+H]+	Postive	KCUZCRLRQVRBBV-UHFFFAOYSA-N	Phenylpropanoids and polyketides	Isoflavonoids	-1	-1	-1	355.11823:53191 355.20157:8133 356.12152:10368 356.20526:1293 357.12842:2028 357.16547:708 357.20584:224 357.27155:229 360.11188:211	93.03362:724 107.08559:651 113.02434:273 121.02753:491 133.06456:2750 151.07332:263 171.11592:366 173.09499:223 187.07463:418 199.1115:2288 200.1133:428 227.10701:663 277.12299:207 339.12256:589	793.518
[(2R,3R,4S,5R,6R)-6-[2-(3,4-dihydroxyphenyl)ethoxy]-3,5-dihydroxy-4-[(2S,3R,4R,5R,6S)-3,4,5-trihydroxy-6-methyloxan-2-yl]oxyoxan-2-yl]methyl (E)-3-(4-hydroxy-3-methoxyphenyl)prop-2-enoate	0.75515	683.22	31874	263890	1581.65	[M-H]-	Negative	OFNCUIXPAFLTJZ-UHFFFAOYNA-N	Phenylpropanoids and polyketides	Cinnamic acids and derivatives	-1	-1	-1	683.21948:118663 684.22205:30036 685.22321:8718 686.22681:1927 687.22906:432		930.3
C45H68O14	13.0763	855.451	27629	256216	1535.65	[M+Na]+	Postive	VQJMXGXETFHHGG-UHFFFAOYNA-N	Lipids and lipid-like molecules	Steroids and steroid derivatives	-1	-1	-1	855.45123:51847 855.9491:874 856.45349:25556 856.96002:218 857.45654:6839 858.45703:1532 859.45923:383	855.45056:8032	978.49
(2R,3S,4S,5R,6S)-5-[(2S,3R,4R)-3,4-dihydroxy-4-(hydroxymethyl)oxolan-2-yl]oxy-6-[4-[(3R,6S)-3-(4-hydroxy-3,5-dimethoxyphenyl)-1,3,3a,4,6,6a-hexahydrofuro[3,4-c]furan-6-yl]-2,6-dimethoxyphenoxy]-2-(hydroxymethyl)oxane-3,4-diol	6.55068	711.248	18992.7	252463	1513.16	[M-H]-	Negative	BUBVKRMIMSPLND-UHFFFAOYNA-N	Lignans, neolignans and related compounds	Lignan glycosides	-1	-1	-1	711.24835:51378 712.04065:220 712.25146:16428 712.36444:243 713.2547:5166 713.35809:203 714.25757:1698 715.27032:293	68.99544:348 112.98538:7999	988.949
N-(2-morpholin-4-ylethyl)-3-(2,3,5,9-tetramethyl-7-oxofuro[3,2-g]chromen-6-yl)propanamide	6.79592	427.223	31595.9	251719	1508.7	[M+H]+	Postive	JMKKXEUWOPVHKC-UHFFFAOYSA-N	Phenylpropanoids and polyketides	Coumarins and derivatives	-1	-1	-1	427.13556:395 427.22281:80719 428.22574:20008 428.63379:205 429.17404:220 429.22824:3085 430.22556:475 431.13248:3019 432.13522:601 432.18903:204		742.303
Eplerenone	10.9584	415.214	24448	250756	1502.93	[M+H]+	Postive	JUKPWJGBANNWMW-RZVCPIHASA-N	Lipids and lipid-like molecules	Steroids and steroid derivatives	-1	-1	-1	415.2135:51135 416.21652:13162 417.21967:1931 419.28125:222	119.08408:473	758.189
NCGC00347819-02	9.65233	323.128	25543.4	249348	1494.48	[M+H]+	Postive	NSNGIRMJTMEZBF-UHFFFAOYNA-N	Benzenoids	Anthracenes	-1	-1	-1	323.12781:51658 324.13043:11340 325.13403:1595 325.19958:658 326.13654:210 326.20493:351 327.18613:236 327.21704:596	55.05381:261	921.446
Benzenepropanamide, N-[2-(acetyloxy)-1-(phenylmethyl)ethyl]-alpha-(benzoylamino)-	10.8026	445.212	27393.5	246349	1476.51	[M+H]+	Postive	VZPAURMDJZOGHU-UHFFFAOYSA-N	Organic acids and derivatives	Carboxylic acids and derivatives	967.894	616.659	428.571	445.21246:57415 446.21536:18385 447.17789:300 447.2175:2707 448.21906:442	77.03862:426 91.05431:1134 92.05714:211 105.0342:8791 106.03697:830 117.07018:1287 118.0731:342 134.09535:235	993.157
Sinapic acid; PlaSMA ID-325	1.26057	223.061	20664.6	242012	1450.52	[M-H]-	Negative	PCMORTLOPMLEFB-UHFFFAOYSA-N	Phenylpropanoids and polyketides	Cinnamic acids and derivatives	-1	-1	-1	222.97824:238 223.06096:34417 224.06473:3547 225.06451:675 225.92619:252 226.90868:248	87.01014:337 91.05521:1752 117.07011:307 161.05988:242 163.04178:502	942.802
Trehalose	0.756	365.106	27437.3	239142	1433.31	[M+Na]+	Postive	HDTRYLNUVZCQOY-LIZSDCNHSA-N	Organic oxygen compounds	Organooxygen compounds	-1	-1	-1	365.1062:51278 366.01981:350 366.10938:6143 367.08041:1466 367.11288:1852 368.08197:239 368.12726:424 369.08524:947 370.08401:4669	365.10489:1007	940.558
Baquiloprim	12.0797	309.185	22554.3	237432	1423.07	[M+H]+	Postive	AIOWJIMWVFWROP-UHFFFAOYSA-N	Organoheterocyclic compounds	Quinolines and derivatives	-1	-1	-1	309.18494:46701 310.18863:9688 311.12219:365 311.20056:12322 312.16437:388 312.20334:2131 313.21637:2607 313.27109:296		928.222
Adenine	0.78715	136.062	28174.1	235478	1411.35	[M+H]+	Postive	GFFGJBXGBJISGV-UHFFFAOYSA-N	Organoheterocyclic compounds	Imidazopyrimidines	806.577	893.42	833.333	136.03041:275 136.0618:97586 136.96078:235 137.06448:6846 138.05507:8838 138.09105:2008 139.03589:1051 139.05284:1003 139.09798:307 140.02391:218 140.06961:1155 140.10678:609 141.03496:258 141.05583:1010	67.02789:553 92.02456:1256 92.04916:602 93.05535:259 94.04017:1055 94.06432:580 95.06901:358 110.03544:273 119.0351:5848 120.03815:375 120.08044:287 136.06171:4800	850.666
Proline-hydroxyproline	10.931	227.108	24778.4	233846	1401.57	[M-H]-	Negative	ONPXCLZMBSJLSP-UHFFFAOYNA-N	Organic acids and derivatives	Carboxylic acids and derivatives	-1	-1	-1	226.97826:218 227.03885:311 227.10756:62987 228.11073:9077 229.11426:1032 231.13875:357		936.428
beta-D-Glucopyranoside, 4-[(1R,3aR,4S,6aS)-6a-(acetyloxy)tetrahydro-4-(4-hydroxy-3-methoxyphenyl)-1H,3H-furo[3,4-c]furan-1-yl]-2-methoxyphenyl	5.77575	623.198	21345.3	229354	1374.65	[M-H]-	Negative	ARPKCZZZMDEOIF-FTCJPABESA-N	Lignans, neolignans and related compounds	Lignan glycosides	-1	-1	-1	623.19763:42921 624.20032:13400 625.20367:4372 625.28125:341 626.21252:585 627.20331:239 627.23151:271	623.19684:830	844.109
N-2-Fluorenylacetamide	0.880583	224.105	16210.5	226646	1358.42	[M+H]+	Postive	CZIHNRWJTSTCEX-UHFFFAOYSA-N	Benzenoids	Fluorenes	-1	-1	-1	223.98546:384 224.10466:17478 224.99475:327 225.10876:1484 225.97845:209 226.06711:683 226.10208:6834 227.10335:678 227.1369:241 227.97781:321 228.08945:388 228.19493:344 228.97824:239	73.02796:2822 74.03126:360 104.10938:230 165.03032:1245	971.222
3-(4-hydroxy-2,2-dimethyl-1-oxo-3,3a-dihydroimidazo[1,2-a]indol-4-yl)-2-(4-oxoquinazolin-3-yl)propanoic acid	7.76355	433.151	21824.5	220014	1318.67	[M-H]-	Negative	BMFPATPGMGPSGR-UHFFFAOYNA-N	Organoheterocyclic compounds	Diazanaphthalenes	-1	-1	-1	433.09177:438 433.15097:48586 434.11035:1508 434.15414:10264 435.14856:2516 436.12579:114361 436.75711:241 437.12839:24037 438.13135:4995	59.01376:1170 61.98807:4505	778.109
Hydroxymethylglutaric acid; PlaSMA ID-124	0.72145	161.045	18369.2	218987	1312.51	[M-H2O-H]-	Negative	NPOAOTPXWNWTSH-UHFFFAOYSA-N	Lipids and lipid-like molecules	Fatty Acyls	-1	-1	-1	161.01224:450 161.04529:37863 162.04845:2524 162.07358:433 162.93864:336 163.02411:1618 163.06108:5662 164.06361:241 164.89696:342 164.91208:205 165.04109:1891 165.07394:422		919.274
Fumaric acid	0.65405	115.004	20926.5	218102	1307.21	[M-H2O-H]-	Negative	VZCYOOQTPOCHFL-UHFFFAOYSA-N	Organic acids and derivatives	Carboxylic acids and derivatives	-1	-1	-1	114.9355:2428 114.94695:1086 114.97093:427 115.00348:34285 115.07402:413 116.00669:1201 116.03419:244 116.07006:245 116.93394:1161 117.01908:21650 118.02224:753 119.03558:1702		980.002
Cyclopenta[c]pyran-4-carboxylic acid, 1,4a,5,6,7,7a-hexahydro-7-hydroxy-1-[[2-O-[(2E)-3-(4-hydroxyphenyl)-1-oxo-2-propen-1-yl]-beta-D-glucopyranosyl]oxy]-7-methyl-, (1S,4aS,7R,7aS)-	5.70538	523.179	23617.9	213790	1281.37	[M+H]+	Postive	LWORTIDRRYUBBP-UHFFFAOYNA-N	Lipids and lipid-like molecules	Prenol lipids	-1	-1	-1	523.17859:54913 524.18121:13366 525.18414:3047 525.22919:3668 526.14801:213 526.18286:568 526.23035:779 527.20209:4579 527.68225:208 528.15375:650		878.804
Benzyl butyl phthalate	10.0261	313.144	22872.4	212816	1275.53	[M+H]+	Postive	IRIAEXORFWYRCZ-UHFFFAOYSA-N	Benzenoids	Benzene and substituted derivatives	-1	-1	-1	313.07303:226 313.14362:41134 314.11057:239 314.14597:6676 315.15048:615 316.1315:628 316.2829:1217	105.07001:236 133.06357:531 142.0746:297 145.10095:381 157.10202:380 173.09633:2221 201.09042:3644 202.09377:416 206.10901:254 242.24698:259	995.564
Lauric isopropanolamide	12.5468	258.243	16588.1	210362	1260.82	[M+H]+	Postive	MMBILEWCGWTAOV-UHFFFAOYNA-N	Lipids and lipid-like molecules	Fatty Acyls	-1	-1	-1	258.24277:17345 259.16669:278 259.2077:249 259.24609:3423		897.404
130119	12.1108	507.229	23787	207902	1246.07	[M+H]+	Postive	CVULDJMCSSACEO-UHFFFAOYSA-N	Organic acids and derivatives	Carboxylic acids and derivatives	-1	-1	-1	507.22934:54072 507.98441:212 508.23245:17838 509.17075:261 509.23688:2922 509.28946:700 510.23819:409 510.29446:240		963.061
Corosolic acid	12.4135	471.348	12651.1	206221	1236	[M-H]-	Negative	HFGSQOYIOKBQOW-UHFFFAOYNA-N	Lipids and lipid-like molecules	Prenol lipids	611.314	750	1000	471.18661:1085 471.34793:20883 472.18491:472 472.24277:203 472.35172:6695 473.22021:553 473.28287:859 473.35312:1457 476.30301:262	61.9877:759 471.34784:440	880.904
5-Flurocytosine	0.974033	130.041	15234.1	205736	1233.09	[M+H]+	Postive	XRECTZIEBJDKEO-UHFFFAOYSA-N	Organoheterocyclic compounds	Diazines	-1	-1	-1	129.96159:887 129.99573:223 130.04066:10069 130.08272:389 130.93318:305 130.96867:1701 131.04326:862 131.9203:1274 131.97655:411 132.04555:226 132.09241:3991 132.96333:233 132.9982:383 133.05876:659 133.09628:401 135.03279:207	56.04731:231 60.98378:227 72.93517:631 84.04162:717	986.395
(1R,3R,4S,5R)-3-[(E)-3-(3,4-dihydroxyphenyl)prop-2-enoyl]oxy-1,5-dihydroxy-4-[(E)-3-(3-hydroxy-4-methoxyphenyl)prop-2-enoyl]oxycyclohexane-1-carboxylic acid	5.33773	529.135	13137.5	205551	1231.98	[M-H]-	Negative	KXSOUIKZMJRRKL-UHFFFAOYNA-N	Organic oxygen compounds	Organooxygen compounds	-1	-1	-1	529.09723:2582 529.13513:13471 530.1369:3309 531.14404:906 531.24585:288 532.15167:379 533.1723:304	68.99628:289 112.98531:2681 173.04622:433 193.05185:477 235.09848:936 367.10406:286	838.161
Tetracain	3.42805	265.191	19492.2	203810	1221.55	[M+H]+	Postive	GKCBAIGFKIBETG-UHFFFAOYSA-N	Benzenoids	Benzene and substituted derivatives	-1	-1	-1	265.19095:28329 266.09543:232 266.13791:639 266.19434:4354 267.13153:273 267.19327:373 268.15433:835 269.15649:249 270.13803:308	206.18816:231 265.19046:974	931.444
Isoflavone base + 2O, O-Hex; PlaSMA ID-2276	5.3557	417.118	15800.2	201133	1205.51	[M+H]+	Postive	KYQZWONCHDNPDP-UHFFFAOYNA-N	Phenylpropanoids and polyketides	Isoflavonoids	-1	-1	-1	417.11771:22053 417.19199:1220 417.28421:267 417.62424:400 418.12119:4530 419.12241:902 419.23737:216 420.1275:225 420.20862:240 420.24829:223	137.02052:235 147.04312:299 240.07497:506 255.06459:305 267.06348:1169 268.07019:1052 269.07294:269 282.08115:283 297.07324:1886 298.07431:286 307.09436:469	843.762
9-methoxycarbonyldec-9-enoic acid	1.16093	229.145	9404.3	199592	1196.27	[M+H]+	Postive	ZUNJWEGRDSXKIO-UHFFFAOYSA-N	Lipids and lipid-like molecules	Fatty Acyls	-1	-1	-1	229.14516:10263 229.51508:222 230.09209:4574 230.14359:2150 230.58128:220 230.9787:448 231.09433:687 231.99706:233 232.01819:286 232.10959:231 232.14482:305 233.01559:222 233.06305:324 233.10088:293 233.97121:348 233.99985:392 234.0864:386		991.991
Pinostrobin	7.96893	271.096	21527.6	194476	1165.6	[M+H]+	Postive	ORJDDOBAOGKRJV-UHFFFAOYNA-N	Phenylpropanoids and polyketides	Flavonoids	-1	-1	-1	271.05817:511 271.0965:48664 272.09933:8394 273.07617:404 273.10367:1151 273.14554:1172 273.18042:320 274.27518:1358 275.1626:511 275.19977:727 275.27423:458	65.03909:343 93.03354:512 107.04983:783 108.05339:477 121.02875:3999 123.04405:578 177.05507:856 229.08699:905	938.14
Benzoic acid, 2-hydroxy-4-methoxy-6-(2-phenylethyl)-	9.4147	271.098	18863.7	191597	1148.35	[M-H]-	Negative	SKLSOJOIYMIFGM-UHFFFAOYSA-N	Phenylpropanoids and polyketides	Stilbenes	-1	-1	-1	271.09753:46340 272.10074:7672 273.10437:984 273.14981:224	213.05617:274	969.607
(+)-Epicatechin	6.85387	289.072	19849.2	189656	1136.72	[M-H]-	Negative	PFTAWBLQPZVEMU-UHFFFAOYNA-N	Phenylpropanoids and polyketides	Flavonoids	-1	-1	-1	289.07159:52606 290.07458:8724 291.07758:1157 291.14139:242 292.05798:263 292.07733:260 293.17459:227	159.04662:415 187.03909:579 188.04678:2677 189.05161:223 202.06316:240 215.03558:435 230.05667:358	943.97
Aloe-emodin	10.3244	269.045	17854.2	187947	1126.47	[M-H]-	Negative	YDQWDHRMZQUTBA-UHFFFAOYSA-N	Benzenoids	Anthracenes	674.026	750	1000	269.0451:37796 269.21094:1704 270.04733:6894 270.21317:499 271.05112:1288 271.0954:868 271.13257:447 271.22632:1567 272.22925:265 273.14859:228	59.01367:339 225.05479:863 241.04897:258 269.04486:6245	857.854
(1S,2S,3aR,4S,5S,6E,9R,11R,12E,13aS)-4,9,11-Triacetoxy-3a-hydroxy-2,5,8,8,12-pentamethyl-2,3,3a,4,5,8,9,10,11,13a-decahydro-1H-cyclopenta[12]annulen-1-yl benzoate	12.0797	567.296	21362.6	187744	1125.25	[M+H]+	Postive	BRVXVMOWTHQKHC-UHFFFAOYNA-N	Lipids and lipid-like molecules	Prenol lipids	-1	-1	-1	567.22522:259 567.29645:46853 568.29944:15595 569.30042:3178 570.25073:383 570.30585:585 571.26886:10624 572.27185:5524		989.773
Chiococcasaponin IV	11.9755	907.469	17973.1	187726	1125.15	[M-H]-	Negative	WCCLEVMDEUCMHT-UHFFFAOYNA-N			-1	-1	-1	907.46875:41215 908.47217:20039 909.38879:213 909.47546:5318 910.47955:1381 911.48053:318	59.0135:687 99.04478:11516 99.08251:230 100.04774:662 847.44946:528 848.45093:233	980.779
isoliquiritigenin	8.67337	255.066	18176.2	184639	1106.65	[M-H]-	Negative	DXDRHHKMWQZJHT-UHFFFAOYSA-N	Phenylpropanoids and polyketides	Linear 1,3-diarylpropanoids	862.997	809.753	833.333	255.01512:203 255.06598:33686 255.23196:829 256.06915:5758 257.04504:427 257.07523:629 258.07889:275 259.04706:355 259.09262:296 260.06494:264	91.01881:1059 92.02518:218 93.03326:258 119.04945:4603 120.05276:237	832.139
(2E)-4-({(3S,3aR,4E,7aS)-7-Hydroxy-4-[(2E,4E)-1-hydroxy-2,4-hexadien-1-ylidene]-3,6,7a-trimethyl-2,5-dioxo-2,3,3a,4,5,7a-hexahydro-1-benzofuran-3-yl}amino)-4-oxo-2-butenoic acid	9.81902	416.134	10779.3	180155	1079.77	[M-H]-	Negative	WVVJWXDENDJFEC-YXFPCCPDSA-N	Organic acids and derivatives	Carboxylic acids and derivatives	-1	-1	-1	416.13437:16921 417.13788:3859 417.32315:397 418.13937:984 419.14865:536 419.2262:208 420.0647:254 420.15826:221	61.98805:3403	983.652
Benzo[b]cyclopenta[e]pyran-8(3H)-one, 3a,5,6,7,9,9a-hexahydro-7-hydroxy-1-[(4E)-6-hydroxy-1,5-dimethyl-4-hexen-1-yl]-3a-methyl-	12.5157	329.211	17483.8	180114	1079.53	[M+H]+	Postive	KOATXBNOVXBDJE-UHFFFAOYNA-N	Lipids and lipid-like molecules	Prenol lipids	-1	-1	-1	329.21121:24871 330.21436:5452 331.21912:781 331.3385:289 333.20358:2148 334.20908:321		812.377
2,3,9,10-tetramethoxy-6,8,13,13a-tetrahydro-5H-isoquinolino[2,1-b]isoquinoline	5.82998	356.185	17228.8	175667	1052.87	[M+H]+	Postive	AEQDJSLRWYMAQI-UHFFFAOYSA-N	Alkaloids and derivatives	Protoberberine alkaloids and derivatives	-1	-1	-1	356.18484:38452 357.12292:289 357.18713:10168 358.15814:896 358.18924:1596 358.30286:302 359.16812:335 361.11496:347 361.16214:1307		960.905
7-hydroxy-coumarin	3.30347	163.039	16592.3	175508	1051.92	[M+H]+	Postive	ORHBXUUXSCNDEV-UHFFFAOYSA-N	Phenylpropanoids and polyketides	Coumarins and derivatives	-1	-1	-1	163.03896:23295 163.08266:508 163.125:241 164.04283:2313 165.04956:582 165.98325:349 167.07034:537	89.03855:807	937.511
MLS000728660-01	6.51565	621.252	21470.2	174790	1047.62	[M+H]+	Postive	BAKYVUHOODEWGV-ZBXWYXHUSA-N	Lipids and lipid-like molecules	Prenol lipids	-1	-1	-1	621.1651:259 621.20557:351 621.25232:45941 622.17871:213 622.2561:14506 623.25409:3296 624.25702:817 625.2251:372 625.26489:231 625.73578:279 626.22711:1245		979.353
Tricin	8.37007	329.066	17841.2	173908	1042.33	[M-H]-	Negative	HRGUSFBJBOKSML-UHFFFAOYSA-N	Phenylpropanoids and polyketides	Flavonoids	898.84	902.476	666.667	329.06589:41645 330.06921:7665 331.07059:1162 334.05856:330	157.75035:268 271.0231:938 285.039:237 299.01797:3266 300.0217:804 301.02197:221 314.04166:5112 315.0451:1255 329.06607:445	750.968
Morphine	4.42465	286.143	20504.7	168713	1011.2	[M+NH4]+	Postive	BQJCRHHNABKAKU-KBQPJGBKSA-N	Alkaloids and derivatives	Morphinans	-1	-1	-1	286.07791:3450 286.14322:24914 286.57739:1139 287.08304:409 287.14651:4030 288.08353:276 288.12143:287 288.1507:403 289.07703:248 289.13937:214	107.04844:454 269.12521:241	988.998
7b,9-Dihydroxy-3-(hydroxymethyl)-1,1,6,8-tetramethyl-5-oxo-1,1a,1b,4,4a,5,7a,7b,8,9-decahydro-9aH-cyclopropa[3,4]benzo[1,2-e]azulen-9a-yl acetate	10.9584	432.24	15692.4	168458	1009.67	[M+NH4]+	Postive	WZYGIALDVOKLLL-UHFFFAOYNA-N	Lipids and lipid-like molecules	Prenol lipids	-1	-1	-1	432.2403:31894 433.19717:265 433.24277:8651 434.07846:247 434.24591:1299 437.19562:56034		984.406
Altertoxin I	11.6436	353.102	19214.4	166996	1000.9	[M+H]+	Postive	GJIALGLHOBXNAT-UHFFFAOYNA-N	Benzenoids	Perylenequinones	-1	-1	-1	353.10178:44196 353.26764:6713 354.10449:9117 354.26968:1880 354.31464:231 355.10834:1544 355.15414:256 355.27896:594 356.1102:259 356.28543:342 357.16971:317 357.27771:311 357.3486:374		675.99
Olean-12-en-28-oic acid, 3-[[O-6-deoxy-alpha-L-mannopyranosyl-(1->3)-O-[beta-D-xylopyranosyl-(1->2)]-beta-D-glucopyranuronosyl]oxy]-, (3beta,5xi,9xi,18xi)-	12.4135	909.486	16911.1	161798	969.751	[M-H]-	Negative	CLQAMCIMWDLXGK-UHFFFAOYNA-N	Lipids and lipid-like molecules	Prenol lipids	-1	-1	-1	909.3479:209 909.48615:41445 910.25647:210 910.48999:19094 910.599:280 911.04895:228 911.49133:7278 912.49719:1492 913.45117:212 913.49438:534	59.01371:1009 99.04484:9980 99.08109:254 100.04861:648 849.46149:600 850.46454:724	981.89
Glycitein	7.12337	283.061	15608.3	160729	963.342	[M-H]-	Negative	DXYUAIFZCFRPTH-UHFFFAOYSA-N	Phenylpropanoids and polyketides	Isoflavonoids	784.529	824.286	800	283.0611:41548 283.2663:537 283.60727:456 284.06378:7931 285.07538:3772 286.08051:1045 286.99704:279 287.05527:660 287.0806:408 287.12793:1104 287.15985:360	136.01805:223 150.03383:267 240.04158:298 268.03732:4955 269.04147:723 270.04742:205 283.06113:232	803.682
Dodemorph	14.7598	282.279	14936.6	160590	962.509	[M+H]+	Postive	JMXKCYUTURMERF-UHFFFAOYSA-N	Organoheterocyclic compounds	Oxazinanes	-1	-1	-1	282.27905:24958 283.28275:3708 284.28488:621	55.05405:581 69.06972:329	745.554
Baicalein	6.34855	269.045	8440.58	160201	960.175	[M-H]-	Negative	FXNFHKRTJBSTCS-UHFFFAOYSA-N	Phenylpropanoids and polyketides	Flavonoids	-1	-1	-1	269.04544:18277 270.04892:3660 270.99823:251 271.02304:314 271.0592:1283 271.09409:249 273.07373:209 273.12885:491 273.14798:465	59.01357:605	994.401
Phosphatidylinositol 16	14.5364	831.502	15641.9	159038	953.204	[M-H]-	Negative	JHVZQBRAEVIBML-DVHZKANPSA-N	Lipids and lipid-like molecules	Glycerophospholipids	-1	-1	-1	831.32922:271 831.50183:42083 832.30035:294 832.50482:18821 833.35846:213 833.51184:9654 834.51813:3405 835.52582:2370	255.23297:499	733.689
1,4-Cyclohexanedicarboxylic acid	1.34783	173.078	13246.9	155982	934.888	[M+Na]+	Postive	PXGZQGDTEZPERC-UHFFFAOYSA-N	Organic acids and derivatives	Carboxylic acids and derivatives	-1	-1	-1	172.85922:276 172.95656:427 172.97464:276 173.01234:220 173.07803:12221 173.12642:267 173.98241:467 173.99777:353 174.05539:224 174.08107:1232 174.15889:1559 174.95221:267 174.99826:328 175.01897:2387 175.0587:514 175.1105:300 175.16359:204 175.97592:3011 177.06963:919 177.94724:628	55.92839:362 72.9813:613 129.09523:314	951.496
Licarin A	12.3911	327.16	17590.7	153328	918.983	[M+H]+	Postive	ITDOFWOJEDZPCF-UHFFFAOYNA-N	Phenylpropanoids and polyketides	2-arylbenzofuran flavonoids	-1	-1	-1	327.15961:40089 328.16241:8352 328.24728:475 329.10043:314 329.16467:1206 329.21066:7513 330.2142:2079 330.26138:500 330.33826:497 331.21695:211		987.844
Caffeyl alcohol	0.788833	165.056	14877	152790	915.758	[M-H]-	Negative	ZCKDCRKBURQZPT-UHFFFAOYSA-N	Phenylpropanoids and polyketides	Cinnamyl alcohols	-1	-1	-1	164.90024:233 165.01952:2981 165.05569:38671 166.02261:411 166.05853:3782 167.03438:768 167.0585:340 168.00627:458 168.03265:735 168.06645:421 169.01431:1100 169.04857:294 170.04686:296	77.03844:366 93.03413:219	990.232
Liranaftate	7.37715	329.128	15964.6	151575	908.478	[M+H]+	Postive	VPHPQNGOVQYUMG-UHFFFAOYSA-N	Benzenoids	Tetralins	-1	-1	-1	329.12817:36001 329.20938:1755 330.13141:7479 330.21182:657 331.14062:1664 332.14777:384 333.1217:364 333.16437:223		978.317
Rhynchophylline	6.05945	385.213	18990.3	150817	903.934	[M+H]+	Postive	DAXYUDFNWXHGBE-KAXDATADSA-N	Organoheterocyclic compounds	Indolizidines	-1	-1	-1	385.14899:491 385.21255:18398 386.15347:210 386.21548:3938 387.14355:987 387.21667:844 389.15695:341	198.09254:702 353.1857:1411 354.19006:534	829.616
(Z)-1,4-bis(4-hydroxy-3-methoxyphenyl)-2,3-dimethylbut-2-ene-1,4-dione	10.2752	339.123	16250.9	149727	897.401	[M+H]+	Postive	ZTNYRNGTBAGYIZ-UHFFFAOYSA-N	Lignans, neolignans and related compounds		-1	-1	-1	339.12308:35027 339.34537:2110 340.12613:9012 340.35083:235 341.13446:2178 342.13361:453 342.22708:358 343.1553:954 343.26471:209	283.05853:376	991.871
Hirsutine; PlaSMA ID-2071	7.25257	369.218	17022.6	146119	875.773	[M+H]+	Postive	NMLUOJBSAYAYEM-UHFFFAOYNA-N	Alkaloids and derivatives	Corynanthean-type alkaloids	-1	-1	-1	369.13388:335 369.21774:41558 370.13181:236 370.18066:270 370.22107:9588 371.11075:425 371.15933:263 371.2243:1556 372.198:265 372.22314:235 373.1283:2428 373.18549:478 374.13425:521	337.19147:809 338.19699:216	914.425
1-(5,10-Dioxohexahydro-1H,5H-dipyrrolo[1,2-a:1',2'-d]pyrazin-5a(6H)-yl)-2-propanyl carbamate	6.67135	296.164	16370.4	145407	871.51	[M+H]+	Postive	LZRMGGWCVAVBJA-UHFFFAOYNA-N	Organic acids and derivatives	Carboxylic acids and derivatives	-1	-1	-1	296.06516:205 296.16397:36195 296.22693:789 297.07187:224 297.16806:7918 298.17163:806 299.09406:466 299.1459:777 300.09262:230 300.20508:222		887.078
10b-Methyl-3,4,5,6,10b,11-hexahydro-2H-4b-aza-chrysene-1,12-dione	5.61193	282.149	17689	145388	871.391	[M+H]+	Postive	RXSOQKYJSMUOPR-SFHVURJKSA-N	Organoheterocyclic compounds	Tetrahydroisoquinolines	-1	-1	-1	282.14932:46267 282.28055:854 282.61807:229 283.15271:10182 284.15683:908 285.11716:259 285.16144:385 286.23621:265 287.14188:425	191.08449:759 219.08018:1014 220.08376:226 236.08102:369 251.10672:1835 253.08731:214	966.914
Benzamide, N-[3-(1-methylethoxy)phenyl]-2-(trifluoromethyl)-	7.15705	322.108	10272.7	144507	866.114	[M-H]-	Negative	PTCGDEVVHUXTMP-UHFFFAOYSA-N	Benzenoids	Benzene and substituted derivatives	-1	-1	-1	322.10828:16262 323.11041:2928 323.18549:282 324.11435:298 325.20239:386	292.05942:304 307.08362:265	949.653
N-(3-acetylphenyl)-2-(4-methyl-2-oxochromen-6-yl)oxyacetamide	5.95457	352.118	17179.5	143970	862.893	[M+H]+	Postive	QXPNUVYPYVTYBJ-UHFFFAOYSA-N	Organic oxygen compounds	Organooxygen compounds	-1	-1	-1	351.65448:208 352.11755:43100 353.12091:9412 354.13083:4854 354.19431:264 355.13022:2165 355.16428:4726 356.12756:574 356.17172:1529		959.777
FA 18:3+2O; PlaSMA ID-633	9.9538	309.206	11177.2	141514	848.177	[M-H]-	Negative	RWKJTIHNYSIIHW-UHFFFAOYNA-N	Lipids and lipid-like molecules	Fatty Acyls	-1	-1	-1	309.10339:232 309.20633:8187 310.10562:231 310.21078:1564 311.21933:507 312.85519:256 313.14548:469 313.17474:293	57.03398:319	966.011
(1S,3R,4R,5R)-3,4-bis[[(E)-3-(3,4-dihydroxyphenyl)prop-2-enoyl]oxy]-1,5-dihydroxycyclohexane-1-carboxylic acid	6.07577	517.134	22921	139339	835.14	[M+H]+	Postive	UFCLZKMFXSILNL-UHFFFAOYNA-N	Organic oxygen compounds	Organooxygen compounds	854.963	723.2	500	517.13379:33170 518.13757:8022 518.21991:230 519.13831:2303 520.14227:449 520.23553:410	123.04177:240 135.0424:349 163.0387:7296 164.04204:736 319.08115:234 337.09033:221	996.857
C47H74O16	12.4809	893.488	13531.8	137662	825.086	[M-H]-	Negative	LXAMCLNOVGHDMD-UHFFFAOYSA-N	Lipids and lipid-like molecules	Prenol lipids	-1	-1	-1	893.23718:266 893.48761:30252 894.23755:218 894.49164:14815 895.45349:14376 896.45215:7329 897.4447:2963 898.44049:1004		880.133
2-Oxobutyric acid	0.72145	101.024	12761.5	137645	824.983	[M-H2O-H]-	Negative	TYEYBOSBBBHJIV-UHFFFAOYSA-N	Organic acids and derivatives	Keto acids and derivatives	-1	-1	-1	101.02422:28863 101.06271:585 102.02859:1290 102.05565:3131 103.00397:2004 103.03974:7181 103.92137:250 104.00723:239 104.03848:1137 105.01911:11363 106.02316:235		972.649
Flavone base + 3O, C-Hex-dHex; PlaSMA ID-2935	3.86407	579.171	14670.4	137211	822.383	[M+H]+	Postive	LYGPBZVKGHHTIE-UHFFFAOYNA-N	Phenylpropanoids and polyketides	Flavonoids	-1	-1	-1	579.17145:31062 580.1748:10088 581.17822:2338 582.18201:432	255.06627:530	886.018
Phloroglucinol	0.756	127.039	15207.8	135296	810.905	[M+H]+	Postive	QCDYQQDYXPDABM-UHFFFAOYSA-N	Benzenoids	Phenols	-1	-1	-1	126.94606:217 126.96852:246 127.03925:31433 127.08201:853 128.04189:1864 128.06992:1536 129.05359:1560 129.06404:1344 129.1013:498 130.05084:1281 130.09612:1839 130.12091:346 131.00272:319 131.03227:213 131.07143:1165 131.11755:1517 131.93001:354	53.0386:419 69.03469:548 81.03298:470 83.06084:536 84.04401:471 84.05624:228 109.02846:210 110.10136:206	953.303
3-HYDROXYPHENYLACETATE	5.23665	151.04	13141.1	134514	806.221	[M-H]-	Negative	FVMDYYGIDFPZAX-UHFFFAOYSA-N	Benzenoids	Phenols	-1	-1	-1	151.03998:27463 152.04265:2666 154.01547:869 154.03502:350 155.03642:339		970.943
Trifolirhizin	5.13768	447.129	15491.1	134404	805.563	[M+H]+	Postive	VGSYCWGXBYZLLE-UHFFFAOYSA-N	Phenylpropanoids and polyketides	Isoflavonoids	631.46	719.131	500	447.12903:40451 448.13242:8473 448.21191:224 449.13522:2179 450.17157:258 451.19678:340	214.06496:246 285.07571:13443 286.07861:2331	997.388
4-[2-hydroxy-3-methyl-3-[(2S,3R,4S,5S,6R)-3,4,5-trihydroxy-6-(hydroxymethyl)oxan-2-yl]oxybutoxy]furo[3,2-g]chromen-7-one	6.01165	511.146	14461.8	132927	796.707	[M-H]-	Negative	VCJBNRNRYLKSGX-UHFFFAOYNA-N	Phenylpropanoids and polyketides	Coumarins and derivatives	-1	-1	-1	511.14566:43048 512.02649:213 512.10516:477 512.14917:11867 513.15143:2404 514.1524:291 515.11786:825 516.12433:237	59.01362:390 117.07009:372 161.06079:1686 205.05048:1158 511.14676:294	977.022
Isoflavanone base + 3O, 1Prenyl; PlaSMA ID-855	10.0212	355.118	9733.24	132118	791.857	[M-H]-	Negative	MERHMOCEIBOOMA-UHFFFAOYNA-N	Phenylpropanoids and polyketides	Isoflavonoids	-1	-1	-1	355.11844:23014 356.12149:4942 357.0965:840 357.12363:1424 357.16687:486 359.09711:263 359.17905:249	59.01285:202 61.98719:229 125.02463:1888 126.02684:290 146.96564:243 229.08578:897 342.07434:241	888.86
L-Iditol	0.72145	181.071	14185.4	131339	787.191	[M-H]-	Negative	FBPFZTCFMRRESA-UNTFVMJOSA-N	Organic oxygen compounds	Organooxygen compounds	-1	-1	-1	180.94719:309 181.01541:289 181.07146:39581 181.12466:985 182.0184:373 182.07458:3747 183.03038:404 183.07562:696 185.01123:217 185.08:246 186.01898:293 186.03345:217		985.228
L-Tryptophan	3.98863	188.07	14641.2	131297	786.937	[M+H]+	Postive	QIVBCDIJIAJPQS-VIFPVBQESA-N	Organoheterocyclic compounds	Indoles and derivatives	-1	-1	-1	188.06979:31371 189.07291:3834 189.96928:488 189.9899:252 190.06149:257 191.01802:337 191.04895:661 191.96712:364 193.00879:255	65.03836:553 115.05354:710	956.495
3-methoxy-2-phenylfuro[2,3-h]chromen-4-one	9.38465	293.078	15252.5	131122	785.892	[M+Na]+	Postive	LKPQNZRGGNOPPU-UHFFFAOYSA-N	Phenylpropanoids and polyketides	Flavonoids	-1	-1	-1	293.07834:19672 293.17706:687 293.20844:955 293.2796:584 294.08206:3436 294.20752:412 295.08279:563 295.22638:475		859.747
1-[2,4,6-trihydroxy-3-[7-hydroxy-2-(4-hydroxyphenyl)-3,4-dihydro-2H-chromen-4-yl]phenyl]dodecan-1-one	12.0797	549.285	13779.5	129126	773.924	[M+H]+	Postive	JGXZVDAPLSTBGZ-UHFFFAOYNA-N	Phenylpropanoids and polyketides	Flavonoids	-1	-1	-1	549.28528:28588 550.28809:9435 551.29486:1681 552.2915:1174 552.4126:242 553.25861:6037 553.4173:315 554.26202:1579		729.468
LPC 16:0; PlaSMA ID-2660	12.2354	496.342	13914.6	128610	770.831	[M+H]+	Postive	ASWBNKHCZGQVJV-UHFFFAOYNA-N	Lipids and lipid-like molecules	Glycerophospholipids	-1	-1	-1	496.34155:30745 497.28882:348 497.34329:7196 498.34674:1492 500.28284:201 501.31699:243		854.353
4a(2H)-Phenanthrenecarboxylic acid, 7-ethenyl-1,3,4,4b,5,6,7,9,10,10a-decahydro-4b-hydroxy-1,1,7-trimethyl-9-oxo-	11.1668	331.191	9708.12	128583	770.674	[M-H]-	Negative	VIDNIVWPSMVGJV-UHFFFAOYSA-N	Benzenoids	Phenanthrenes and derivatives	-1	-1	-1	331.19107:20837 331.2569:352 332.19388:4675 333.19846:1145 334.20374:214 335.09201:28992 336.09644:5424	331.19031:2222	977.434
16-[(2R,3R,4R,5S,6R)-5-[(2S,3R,4S,5R,6R)-4-acetyloxy-5-hydroxy-6-(hydroxymethyl)-3-(3-hydroxyoctanoyloxy)oxan-2-yl]oxy-6-(acetyloxymethyl)-3,4-dihydroxyoxan-2-yl]oxy-3,15-dihydroxyhexadecanoic acid	12.4534	872.48	13586.9	127955	766.908	[M+H]+	Postive	AERAMEUFSDVACO-UHFFFAOYNA-N	Lipids and lipid-like molecules	Saccharolipids	-1	-1	-1	872.48041:32657 872.97217:554 873.48285:16282 873.9538:831 874.4856:5515 874.58948:230 874.95789:1406 875.42206:27907 875.90912:209 875.95526:447 876.42401:15573 876.93005:943 877.43671:124936		739.93
6,8-dihydroxy-3-(10-hydroxyundecyl)-3,4-dihydroisochromen-1-one	8.00008	351.215	5882.64	127354	763.306	[M+Na]+	Postive	YLEKEQNOOIMZQM-UHFFFAOYSA-N	Benzenoids	Benzene and substituted derivatives	-1	-1	-1	351.17926:308 351.21481:5591 352.15424:6155 352.21674:1178 353.15701:1505 354.09845:315 354.22226:216 355.11401:618 355.14978:300	336.1199:408 337.12744:355	988.5
Gluconic acid	0.68775	195.051	14123.2	126576	758.641	[M-H]-	Negative	RGHNJXZEOKUKBD-SQOUGZDYSA-N	Organic oxygen compounds	Organooxygen compounds	418.243	707.35	545.455	194.93147:285 194.95633:1215 194.98834:275 195.05078:40182 195.81062:5135 196.05475:2918 197.01469:628 197.05441:1275 197.80797:7296 198.80736:334 198.98782:357 199.02844:314 199.05901:316 199.80492:3289	56.99714:200 57.03524:803 59.01381:1657 71.01277:316 75.00846:4009 80.96424:373 87.00821:319 96.95981:321 160.84192:1342 162.83849:1649 195.0528:248	999.832
??17-U-46619	13.9635	347.22	12265.8	125525	752.344	[M-H]-	Negative	LQANGKSBLPMBTJ-BRSNVKEHSA-N	Lipids and lipid-like molecules	Fatty Acyls	-1	-1	-1	346.871:2587 346.92657:1277 347.16708:237 347.21988:21354 347.9332:275 348.22293:5026 348.86874:1983 348.92255:1129 349.22678:755 349.92465:205 350.03528:214 350.86606:286 351.11868:215		867.856
Arctiin; PlaSMA ID-1598	5.91058	579.208	13293.1	123703	741.425	[M-H]-	Negative	XOJVHLIYNSOZOO-UHFFFAOYNA-N	Lignans, neolignans and related compounds	Lignan glycosides	-1	-1	-1	579.20801:38611 580.21136:9877 581.21533:2161 582.18036:422 582.21704:488 583.31128:828 584.20361:243		986.202
Tunicamycin D	11.8305	859.446	13802.4	123554	740.529	[M+H]+	Postive	XCEPHNBEHQJSSB-LGJGITPNSA-N	Organic oxygen compounds	Organooxygen compounds	-1	-1	-1	859.44586:32961 860.44928:14619 861.45123:4703 862.45056:1323 863.45099:440		984.583
methyl 3-(3,4-dihydroxyphenyl)-2-[(2,2-dimethylchromen-6-yl)methyl]-4-methoxy-5-oxofuran-2-carboxylate	10.8299	451.137	12384.2	122435	733.825	[M-H]-	Negative	DHAXSUMTBBBFBJ-UHFFFAOYNA-N	Organoheterocyclic compounds	Benzopyrans	-1	-1	-1	451.13666:25550 451.2435:225 452.14038:4868 452.29007:261 453.11743:1275 453.14093:1587 453.19415:379 453.28671:223 454.11835:429 454.14539:401	68.99563:13672 69.02659:326 112.98522:3675	981.324
(2E,4E)-5-{(1S,2R,4aS,5S,8S,8aS)-2-[(2E)-2-Buten-2-yl]-5-hydroxy-3,8-dimethyl-1,2,4a,5,6,7,8,8a-octahydro-1-naphthalenyl}-2,4-pentadienoic acid	12.5468	313.216	8195.85	122405	733.643	[M+H]+	Postive	KNDPLJZJPQWOMQ-FDTXVGEPSA-N	Lipids and lipid-like molecules	Fatty Acyls	-1	-1	-1	313.21591:18042 314.21927:4103 315.1897:261 315.22369:607 316.19525:264 317.21436:235	71.0491:269 105.07073:348	807.263
Curcumin; LC-ESI-ITTOF; ; [M-H]-	10.1223	367.118	12619.3	121992	731.17	[M-H]-	Negative	VFLDPWHFBUODDF-FCXRPNKRSA-N	Phenylpropanoids and polyketides	Diarylheptanoids	-1	-1	-1	367.03537:241 367.11795:31304 368.0499:222 368.12115:5653 369.12839:1651		977.3
Boldine	4.67047	328.154	8417.79	121439	727.852	[M+H]+	Postive	LZJRNLRASBVRRX-ZDUSSCGKSA-N	Alkaloids and derivatives	Aporphines	-1	-1	-1	328.15359:13160 328.18793:4388 329.1575:2973 329.19223:878 330.16739:2026 331.17181:465 332.17465:254 332.20459:510	58.06472:453 91.05244:388 163.06281:349 178.08525:395	886.609
Remerine	6.64022	280.133	13566.3	121212	726.493	[M+H]+	Postive	JCTYWRARKVGOBK-UHFFFAOYNA-N	Alkaloids and derivatives	Aporphines	-1	-1	-1	280.09909:221 280.13318:26274 281.07886:276 281.13773:5008 282.13766:531 282.2775:822 283.08356:459 283.10919:430		642.136
(1aS,1bS,2S,5aR,6S,6aS)-6-({6-Deoxy-4-O-[(2E)-3-(4-hydroxyphenyl)-2-propenoyl]-alpha-L-mannopyranosyl}oxy)-1a-(hydroxymethyl)-1a,1b,2,5a,6,6a-hexahydrooxireno[4,5]cyclopenta[1,2-c]pyran-2-yl beta-D-glucopyranoside	4.3943	653.209	9906.06	120913	724.701	[M-H]-	Negative	WYUMOABRAAEBAO-UHFFFAOYNA-N	Phenylpropanoids and polyketides	Cinnamic acids and derivatives	-1	-1	-1	653.20874:9733 654.21063:3339 654.745:203 655.21802:1123 656.88605:235 657.23822:233	59.01314:943 89.02436:700 101.02444:213 115.0537:364 187.03905:2334 188.0425:457	984.118
BENZALDEHYDE	6.73363	107.05	10845.5	120605	722.856	[M+H]+	Postive	HUMNYLRZRPPJDN-UHFFFAOYSA-N	Benzenoids	Benzene and substituted derivatives	-1	-1	-1	107.04964:22553 108.05289:1411 108.96339:214 109.10104:261 109.94536:336 111.04473:286 111.98475:292	77.03877:1887 78.04679:254 79.05396:279 81.93798:286 107.04969:573	700.079
3-hydroxy-1,5-diphenylpentan-1-one	5.70538	255.137	8140.83	119867	718.429	[M+H]+	Postive	QJUWGGININGVSC-UHFFFAOYNA-N	Organic oxygen compounds	Organooxygen compounds	-1	-1	-1	255.13702:9691 256.14038:2145 256.26242:429 257.11392:641 257.15256:7175 258.12982:208 258.15646:1624 259.07809:251 259.16074:288		956.627
Trigonelline	0.756	138.055	14432.7	119514	716.317	[M+H]+	Postive	WWNNZCOKKKDOPX-UHFFFAOYSA-N	Alkaloids and derivatives		841.664	907.277	1000	137.95992:247 138.05513:37400 139.0385:782 139.058:2798 140.07133:1230 140.51984:225 141.02818:440 141.05443:2306 141.11424:243 141.95865:209 142.02393:258 142.05234:375 142.095:317 142.1235:713 143.03491:229	53.03897:233 65.0386:269 78.03323:232 79.0416:215 92.04953:1382 94.06569:1611 138.05548:2202	847.71
Arctigenin	13.6602	371.15	12662	118680	711.32	[M-H]-	Negative	NQWVSMVXKMHKTF-UHFFFAOYNA-N	Lignans, neolignans and related compounds	Furanoid lignans	750	750	1000	371.1496:30469 372.15253:6785 372.9881:471 373.155:1263 374.88065:294 375.267:390	371.14935:4697	745.773
Kaempferol	8.33637	285.04	7518.15	118532	710.429	[M-H]-	Negative	IYRMWMYZSQPJKC-UHFFFAOYSA-N	Phenylpropanoids and polyketides	Flavonoids	676.917	750	1000	285.04037:12777 285.18179:363 285.20511:255 286.04517:891 287.04874:609	214.0448:224 285.03931:1561	883.45
Propanoic acid, 2-methyl-, [(4S)-4-(acetyloxy)-5-[4-(acetyloxy)-1-methylbutyl]-2,3,3a,4,7,7a-hexahydro-3-methylene-2-oxo-6-benzofuranyl]methyl ester	8.3427	437.217	13200.1	118470	710.056	[M+H]+	Postive	AAHSTEUFCXJGIV-DUBKMGCZSA-N	Lipids and lipid-like molecules	Prenol lipids	-1	-1	-1	437.21716:23039 438.1842:386 438.21939:5519 438.27518:310 439.22598:1147 439.68115:413 440.15524:220 441.24411:751 442.20984:319		886.638
Maltotriose	0.75515	503.157	12337.1	117450	703.948	[M-H]-	Negative	FYGDTMLNYKFZSV-PXXRMHSHSA-N	Organic oxygen compounds	Organooxygen compounds	-1	-1	-1	503.15726:26866 504.15973:5275 505.08774:358 505.16858:1466 506.1619:332 507.15237:570 507.18835:272 508.13397:349	59.01378:1203 71.01284:351 73.02963:231 85.02901:222 89.02482:442	984.107
1-Naphthalenecarboxylic acid, 3-(acetyloxy)-5-[2-(3-furanyl)ethyl]-3,4,4a,5,6,7,8,8a-octahydro-8a-(hydroxymethyl)-5,6-dimethyl-	5.37142	435.203	13075.8	115974	695.097	[M-H]-	Negative	NRNSOEIINXSQRA-UHFFFAOYNA-N	Lipids and lipid-like molecules	Prenol lipids	-1	-1	-1	435.12546:431 435.20288:38991 436.07553:210 436.20642:10145 437.20816:1428 438.21332:246 439.22949:398	229.16064:307 273.14905:2781 274.15289:1686	921.245
C21H13N3O3	5.23113	356.106	12942.8	115820	694.176	[M+H]+	Postive	NUBAAWQBTGSVGH-UHFFFAOYSA-N	Organoheterocyclic compounds	Diazanaphthalenes	-1	-1	-1	356.10547:31357 356.17801:5167 357.10919:5973 357.18271:1163 358.11356:589 358.2142:332 359.11069:203 359.16409:217 360.52936:204		924.91
Eicosenoic acid	16.4232	309.28	8584.89	115737	693.678	[M-H]-	Negative	BITHHVVYSMSWAG-UHFFFAOYSA-N	Lipids and lipid-like molecules	Fatty Acyls	-1	-1	-1	309.17441:211 309.27979:12033 310.28275:3200 311.16855:2221 311.28711:509 312.17136:609 313.19443:233	183.01117:816	978.402
Biochanin A	8.24927	285.076	10614.7	115716	693.55	[M+H]+	Postive	WUADCCWRTIWANL-UHFFFAOYSA-N	Phenylpropanoids and polyketides	Isoflavonoids	-1	-1	-1	285.0759:22621 285.16049:259 285.2193:672 286.07895:4108 286.14716:200 286.23096:482 287.08148:1061 287.20325:348 288.93054:280 289.07037:336 289.14026:302	128.86972:235	983.597
MLS000574943-01	11.301	335.219	9740.07	115022	689.392	[M+H]+	Postive	BYASTQVSNAVAKL-UHFFFAOYNA-N	Lipids and lipid-like molecules	Prenol lipids	-1	-1	-1	335.16211:214 335.21912:18987 336.12039:488 336.16028:268 336.22226:4163 336.32489:206 337.02301:216 337.06323:216 337.10727:163681 337.67856:264 338.11075:32306 338.34106:13910 339.1138:4375 339.25146:281 339.34534:3748 340.12329:430		969.982
Anthraquinone base + 1O, MeOH, O-Hex; PlaSMA ID-1054	4.73125	415.103	10807.2	114423	685.805	[M-H]-	Negative	BSYSQCIGSQBEKF-UHFFFAOYNA-N	Benzenoids	Anthracenes	-1	-1	-1	415.10272:21782 415.18488:291 416.10635:4955 417.11237:1422 417.13928:1007 417.32047:281 418.11697:323 419.09995:270	59.01351:1028 81.03459:267 267.06354:400	789.653
FAHFA 36:3	13.9635	559.473	12387.5	113872	682.503	[M-H]-	Negative	GKFRCWOFCMCBNW-GSCXELOCNA-N			-1	-1	-1	559.2301:220 559.29926:289 559.32031:257 559.47272:29705 560.33783:307 560.47607:11507 560.87646:585 561.34601:1173 561.47998:2961 562.35248:407 562.48389:316 562.87463:346 563.34558:263 564.34302:298	279.23267:30139 280.23593:5752 281.23874:342	865.508
STEPHENANTHRINE	1.19208	294.148	5519.15	113345	679.341	[M+H]+	Postive	FXTBDJZGDJJCQU-UHFFFAOYSA-N	Alkaloids and derivatives	6,6a-secoaporphines	-1	-1	-1	294.12192:251 294.14828:6203 295.07309:231 295.14966:816		985.16
N~5~-Carbamoyl-N~2~-(phenylacetyl)ornithine	1.19208	294.145	5519.15	113345	679.341	[M+H]+	Postive	FTYZUGZNDHQHFV-UHFFFAOYSA-N	Organic acids and derivatives	Carboxylic acids and derivatives	-1	-1	-1	294.14502:5508 294.19196:414 295.14813:585 295.89542:205 296.14743:213		904.749
5,7-dihydroxy-6-[3,4,5-trihydroxy-6-(hydroxymethyl)oxan-2-yl]-8-[3,4,5-trihydroxy-6-(hydroxymethyl)oxan-2-yl]oxychromen-2-one	4.79863	517.125	7852.92	113147	678.156	[M-H]-	Negative	YRVGYJMSCQFOCA-UHFFFAOYSA-N	Phenylpropanoids and polyketides	Coumarins and derivatives	-1	-1	-1	517.12494:15846 518.09778:321 518.12695:2611 518.21271:250 519.12958:368 519.2489:387 521.08838:219 521.12555:206		989.196
Succinic acid (not validated); PlaSMA ID-26	0.65405	117.019	11033.3	113057	677.613	[M-H]-	Negative	KDYFGRWQOYBRFD-UHFFFAOYSA-N	Organic acids and derivatives	Carboxylic acids and derivatives	458.728	366.208	500	116.93394:1161 117.01908:21650 118.02224:753 119.03558:1702	68.02477:254 73.02853:258	994.295
Pyroglutamic acid (Not validated); PlaSMA ID-39	0.72145	128.035	11804.2	112906	676.712	[M-H]-	Negative	ODHCTXKNWHHXJC-UHFFFAOYNA-N	Organic acids and derivatives	Carboxylic acids and derivatives	-1	-1	-1	128.03514:26914 128.07701:579 129.01918:5012 129.03781:1799 130.05048:3435 130.99698:261 131.04227:12985 132.04118:645 132.06624:1235 132.94661:2544 133.0139:4117	85.02947:204	929.237
FA 18:2+3O; PlaSMA ID-714	6.2138	327.218	7135.33	112792	676.03	[M-H]-	Negative	MKYUCBXUUSZMQB-UHFFFAOYNA-N	Lipids and lipid-like molecules	Fatty Acyls	-1	-1	-1	327.05463:212 327.08362:285 327.18164:356 327.21774:14667 327.2836:241 328.22043:3015 329.06378:653 329.09863:236 329.22067:655 330.2356:208 331.18445:224 332.15869:203	59.01383:625 211.13069:225	895.627
Coniferyl aldehyde	6.38223	177.055	10813.4	112448	673.967	[M-H]-	Negative	DKZBBWMURDFHNE-UHFFFAOYSA-N	Benzenoids	Phenols	936.956	678.711	500	177.01871:620 177.05554:20901 177.1261:228 178.05928:1411 179.03409:345 179.05687:273	134.03575:233 162.03122:1432	993.515
Disaccharide(Hex-Hex); PlaSMA ID-1741	0.756	325.113	13312.3	110886	664.607	[M+H]+	Postive	PVXPPJIGRGXGCY-UHFFFAOYNA-N	Organic oxygen compounds	Organooxygen compounds	-1	-1	-1	325.07556:401 325.11319:26458 325.23297:271 325.7681:221 326.07852:565 326.11838:3500 327.12344:889 328.1178:593 328.15744:318 329.1033:221	61.02869:598 81.03274:247 85.02863:2135 97.02971:374 127.03932:788	951.301
Chalcone base + 3O, 1Prenyl; PlaSMA ID-1749	12.6714	325.143	12059.3	108467	650.106	[M+H]+	Postive	DUWPGRAKHMEPCM-UHFFFAOYSA-N	Phenylpropanoids and polyketides	Linear 1,3-diarylpropanoids	-1	-1	-1	325.14319:24562 325.23828:351 326.14655:4973 327.15231:628 327.19394:240 329.20792:420	265.12265:224 283.09738:247 292.10818:345 307.13162:450 310.11926:1483 311.12091:365 325.14505:832	987.972
(2S,3R,4S,5S,6R)-2-[4-[(3S,3aR,6S,6aR)-3-(4-hydroxy-3,5-dimethoxyphenyl)-1,3,3a,4,6,6a-hexahydrofuro[3,4-c]furan-6-yl]-2,6-dimethoxyphenoxy]-6-(hydroxymethyl)oxane-3,4,5-triol	5.89228	598.25	10932.5	106146	636.192	[M+NH4]+	Postive	WEKCEGQSIIQPAQ-IRBNZIFYSA-N	Lignans, neolignans and related compounds	Lignan glycosides	-1	-1	-1	598.24994:22105 599.25354:6556 600.25769:1608 600.69:220 601.26837:242 602.19971:207 603.20587:18733		981.099
2-(2,4-dihydroxyphenyl)-5,7-dihydroxy-3,8-bis(3-methylbut-2-enyl)chromen-4-one	12.578	423.18	9704.01	106070	635.74	[M+H]+	Postive	UWQYBLOHTQWSQD-UHFFFAOYSA-N	Phenylpropanoids and polyketides	Flavonoids	-1	-1	-1	423.17953:20195 424.18265:4471 425.18976:1037 425.27042:260 425.32504:207 426.26852:292 427.19379:218 427.27948:292		976.194
Daidzin	4.4782	439.101	15080.4	105698	633.509	[M+Na]+	Postive	KYQZWONCHDNPDP-QNDFHXLGSA-N	Phenylpropanoids and polyketides	Isoflavonoids	-1	-1	-1	439.10059:23224 440.10309:5090 441.1087:855 442.11267:272 443.08066:212 443.1889:208 444.07715:1783	439.0993:729	842.917
beta-D-Glucopyranose, 1-O-[(3beta,5xi,9xi)-3-(beta-D-glucopyranuronosyloxy)-30-methoxy-28,30-dioxoolean-12-en-28-yl]-	10.8299	837.428	11297.1	105679	633.396	[M-H2O-H]-	Negative	MUEUOXPTUMGVJS-VOSOKIIWSA-N	Lipids and lipid-like molecules	Prenol lipids	-1	-1	-1	837.42804:27897 838.43036:12595 839.44116:14772 840.44623:5861 841.44287:1775		905.135
Mepivacaine	2.33795	247.179	5054.87	105533	632.52	[M+H]+	Postive	INWLQCZOYSRPNW-UHFFFAOYSA-N	Organoheterocyclic compounds	Piperidines	880	466.515	500	247.17931:5115 248.18521:797 249.19574:2768 250.10899:221 250.1974:657 251.23172:210 251.96323:395 252.11845:252	247.17952:953	994.051
Citramalic acid	0.75515	147.029	8661.4	104892	628.675	[M-H]-	Negative	XFTRTWQBIOMVPK-UHFFFAOYSA-N	Lipids and lipid-like molecules	Fatty Acyls	-1	-1	-1	147.0291:20483 147.06454:3235 148.03265:812 148.06531:474 149.04468:8803 149.9445:230 150.04683:802 151.06038:18065 151.10602:373	59.01355:225	985.384
6-{7-Acetoxy-5-chloro-3-[(1E,3E)-3,5-dimethyl-1,3-heptadien-1-yl]-7-methyl-6,8-dioxo-7,8-dihydro-2(6H)-isoquinolinyl}norleucine	5.70538	519.226	11619.6	104326	625.284	[M+H]+	Postive	QTKJPFQTRUDUFR-UHFFFAOYNA-N	Organoheterocyclic compounds	Azaphilones	-1	-1	-1	519.16345:230 519.22577:25822 520.17108:3032 520.22809:5936 520.67188:1148 521.17273:697 521.22809:1010 521.6972:285 522.21387:795 522.29126:232 523.17859:54913 524.18121:13366		958.572
PTEROCARPIN METHYLETHER	8.96558	299.091	10180.4	103658	621.283	[M+H]+	Postive	YLZYAUCOYZKLMA-UHFFFAOYNA-N	Phenylpropanoids and polyketides	Isoflavonoids	-1	-1	-1	298.87659:214 299.09125:23159 299.15546:391 300.09558:3561 301.09717:623 302.91803:3688 303.92123:283		988.584
2(3H)-Furanone, 3-[2-[(1R,4aS,5R,6R,8aS)-decahydro-6-hydroxy-5-(hydroxymethyl)-5,8a-dimethyl-2-methylene-1-naphthalenyl]ethylidene]dihydro-4-hydroxy-, (3E,4R)-	12.1731	333.204	9210.29	103510	620.392	[M+Na]+	Postive	BOJKULTULYSRAS-NPWGMBKGSA-N	Organoheterocyclic compounds	Lactones	-1	-1	-1	333.20422:14163 334.2084:2481 335.21381:479 336.12027:372 337.1077:2937 337.23911:232 338.1102:337 338.13571:273		981.59
Itaconic acid (Not validated); PlaSMA ID-45	0.788833	129.019	8971.26	101248	606.84	[M-H]-	Negative	LVHBHZANLOWSRM-UHFFFAOYSA-N	Lipids and lipid-like molecules	Fatty Acyls	-1	-1	-1	129.01913:20879 129.05681:1999 130.02277:1018 130.0587:239 130.08574:360 131.03606:1839 131.07112:463 132.03893:269 132.86629:218 133.01401:11808 133.04906:1050 134.01643:361		876.232
Feruloyltyramine	6.95752	314.138	26752.6	100996	605.329	[M+H]+	Postive	SFUVCMKSYKHYLD-FNORWQNLSA-N	Phenylpropanoids and polyketides	Cinnamic acids and derivatives	788.394	922.2	800	314.13773:26019 314.22974:275 315.14142:5066 316.14276:865	121.06298:1539 145.02666:1427 146.03021:236 177.05266:3969 178.05585:597	823.69
Flavanone base + 4O, 1Prenyl; PlaSMA ID-1994	7.84435	357.133	8361.8	98417.6	589.873	[M+H]+	Postive	SFQIGPZCFNTPOD-UHFFFAOYNA-N	Phenylpropanoids and polyketides	Flavonoids	-1	-1	-1	357.13321:17888 358.13608:4293 358.21698:242 358.25931:243 359.13724:683 360.24112:213 361.16156:387 361.24313:242		968.756
9-methanesulfinylnonanoic acid; PlaSMA ID-314	10.6614	219.102	9525.82	98233.2	588.768	[M-H]-	Negative	XZYIQKMSOAQJCG-UHFFFAOYNA-N	Lipids and lipid-like molecules	Fatty Acyls	-1	-1	-1	219.10236:16915 219.17583:315 219.98814:267 220.10571:1991 223.02646:215		987.295
(2S,3R,4S,5S,6R)-2-[4-[(3S,3aR,6S,6aR)-6-[3,5-dimethoxy-4-[(2S,3R,4S,5S,6R)-3,4,5-trihydroxy-6-(hydroxymethyl)oxan-2-yl]oxyphenyl]-1,3,3a,4,6,6a-hexahydrofuro[3,4-c]furan-3-yl]-2,6-dimethoxyphenoxy]-6-(hydroxymethyl)oxane-3,4,5-triol	4.95082	760.304	11596.8	97938.9	587.004	[M+NH4]+	Postive	FFDULTAFAQRACT-UHFFFAOYNA-N	Lignans, neolignans and related compounds	Lignan glycosides	-1	-1	-1	760.3042:28943 761.30652:10456 762.30908:2620 762.76056:314 763.31079:560 765.25928:45965		948.301
Sinomenine	4.85737	330.17	11070.5	97666.2	585.37	[M+H]+	Postive	INYYVPJSBIVGPH-QHRIQVFBSA-N	Alkaloids and derivatives	Morphinans	-1	-1	-1	330.16995:28795 331.17316:4901 332.17688:678 334.10211:224 334.18213:421 335.10818:796	192.10248:1222	986.084
Perfluorooctanesulfonamide	14.907	497.95	3811.01	97649.4	585.269	[M-H]-	Negative	RRRXPPIDPYTNJG-UHFFFAOYSA-N	Organohalogen compounds	Alkyl halides	-1	-1	-1	497.87045:226 497.9498:4747 498.86349:1456 498.95343:849 499.36304:495 499.94702:9409 500.8609:417 500.94843:2016 501.31985:260 501.94418:9255 502.8985:223 502.94946:2037	59.01403:546 61.98832:4558	964.816
C20H32O5	9.21473	353.23	11228.7	97527.7	584.54	[M+H]+	Postive	UXVRTOKOJOMENI-WLPVFMORSA-N	Lipids and lipid-like molecules	Fatty Acyls	-1	-1	-1	353.15689:346 353.22989:24623 354.2323:5194 355.15295:257 355.23294:580 355.25745:314 356.14395:211 357.13385:473 358.22873:214		976.531
Sinapoylhexoside (isomer of 955); PlaSMA ID-953	1.42907	385.113	8130.12	97402.8	583.791	[M-H]-	Negative	XRKBRPFTFKKHEF-UHFFFAOYNA-N	Phenylpropanoids and polyketides	Cinnamic acids and derivatives	-1	-1	-1	384.93405:334 385.11331:10612 386.11688:2822 387.12039:382 389.29141:206	161.05972:331	986.541
Daphnoretine Acetate	4.9671	453.086	9841.63	97091.1	581.923	[M-H]-	Negative	JGZOXTSCOZGQNQ-UHFFFAOYSA-N	Phenylpropanoids and polyketides	Coumarins and derivatives	-1	-1	-1	453.08582:22739 453.16528:492 454.08914:6256 454.1925:272 455.0864:2346 455.1705:233 456.08514:396 457.19809:315	80.96539:4958 371.11282:955 372.11484:229	733.303
Benz[3,4]anthra[1,2-b]oxirene-5,6-dione, 1a,2,3,4,5b,11,11a,11b-octahydro-10,11,11a-trihydroxy-3-methyl-	0.75515	387.111	11111.5	96908.7	580.83	[M-H]-	Negative	KALVKBCVJGXOKE-UHFFFAOYSA-N	Benzenoids	Tetralins	-1	-1	-1	387.11142:35126 388.11426:5923 389.11401:2476 390.11877:645 391.09067:449 391.12219:409	61.98816:507 165.05508:1442	779.682
11-(phenylcarbonyl)-7,11-diazatricyclo[7.3.1.0<2,7>]trideca-2,4-dien-6-one	4.3935	295.144	11487.7	96889.2	580.713	[M+H]+	Postive	HODDQHCNQOBZKP-UHFFFAOYSA-N	Organoheterocyclic compounds	Piperidines	-1	-1	-1	295.09726:254 295.14417:26351 296.14792:4293 297.14819:456 298.08298:211 298.1344:299 298.9986:282 299.14926:359		998.7
Flavone base + 3O, C-Hex, C-pen; PlaSMA ID-1548	5.03448	563.14	7867.78	96299.7	577.179	[M-H]-	Negative	TUIJPUWSXVFWSH-UHFFFAOYNA-N	Phenylpropanoids and polyketides	Flavonoids	-1	-1	-1	563.14032:20546 564.14337:5809 565.14655:2325	311.05389:307	972.049
Phosphatidylinositol 18	14.7722	859.533	8700.68	96286.7	577.101	[M-H]-	Negative	YWXCZYNZOLHDAW-RFSLHEDBSA-N	Lipids and lipid-like molecules	Glycerophospholipids	-1	-1	-1	859.42712:223 859.53326:19630 860.53638:10959 861.5401:4628 862.54651:837 863.54486:487 864.51587:286	61.98777:340	989.328
(+)-Corydaline	6.4363	370.201	18532.3	95226.4	570.747	[M+H]+	Postive	VRSRXLJTYQVOHC-YEJXKQKISA-N	Alkaloids and derivatives	Protoberberine alkaloids and derivatives	228.966	726.741	500	370.20068:20078 371.11087:775 371.20432:5773 372.14954:207 372.20792:778 373.16849:288 374.17844:546 375.14468:473	191.07928:235 206.11729:533 352.11557:422 370.20056:360	997.611
C27H30N2O10	6.7025	543.197	11030.8	94663.9	567.375	[M+H]+	Postive	YUCVPZILWXKQCX-UHFFFAOYNA-N	Organoheterocyclic compounds	Indoles and derivatives	-1	-1	-1	543.1424:256 543.19745:27096 544.19983:7367 545.0589:575 545.2041:1915 546.21118:366 547.08917:505 548.19287:288		989.305
FA 18:4+1O; PlaSMA ID-1476	10.1507	293.211	4926.84	94424	565.937	[M+H]+	Postive	PMTMAFAPLCGXGK-UHFFFAOYNA-N	Lipids and lipid-like molecules	Fatty Acyls	-1	-1	-1	293.18854:1325 293.21051:9378 294.21552:1885 295.22525:519 297.20627:470 297.24219:398	67.05357:235 105.06845:210	947.178
Daidzein	12.6157	253.05	9639.38	93088.9	557.936	[M-H]-	Negative	ZQSIJRDFPHDXIC-UHFFFAOYSA-N	Phenylpropanoids and polyketides	Isoflavonoids	673.428	750	1000	253.05037:19192 253.10764:333 254.05409:3114 255.07024:849 255.23245:1375 256.23291:282 257.12662:256	225.0535:381 253.04976:2977	935.014
4,6,8-Decatrienamide, 3-hydroxy-2,2,4-trimethyl-10-(5-oxazolyl)-, (3R,4Z,6Z,8E)-	12.0797	291.175	8699.57	93039.6	557.64	[M+H]+	Postive	MRTUFVRJHFZVOT-UHFFFAOYNA-N	Organoheterocyclic compounds	Azoles	-1	-1	-1	291.17462:16793 292.177:3761 293.19217:2389 294.20154:614 295.1962:318 295.2251:382		899.798
Pterocarpan base + 1O, 1MeO; PlaSMA ID-1223	9.38465	271.096	11175.7	92706.2	555.641	[M+H]+	Postive	NSRJSISNDPOJOP-UHFFFAOYNA-N	Phenylpropanoids and polyketides	Isoflavonoids	-1	-1	-1	271.09644:16398 271.19223:502 272.10196:4316 272.25821:2332 273.11124:7052 273.18356:269 273.25867:439 274.11652:1468 274.27386:10627 275.16287:795 275.27698:1464	57.07037:458 62.05957:225 71.08633:239 88.07531:619 102.09059:362 106.08617:1490 194.06848:233 228.07837:227 230.24683:295 243.10065:421 256.26431:429 271.09406:272	922.526
Leucylproline; PlaSMA ID-901	0.8183	229.154	9525.86	92668.5	555.416	[M+H]+	Postive	VTJUNIYRYIAIHF-UHFFFAOYNA-N	Organic acids and derivatives	Carboxylic acids and derivatives	-1	-1	-1	229.06473:434 229.12686:356 229.1539:23110 229.97182:1987 230.10374:354 230.13727:1058 230.15567:2770 230.18396:884 230.97624:202 231.01599:2488 231.09413:503 231.13658:464 231.15965:313 231.97232:262 232.02113:285 232.11682:912 232.15349:5723 233.0013:248 233.05652:785 233.1161:606 233.15559:1409 233.55101:216 233.94586:215 233.98088:817 234.05447:491 234.10004:679 234.13258:2727		979.454
4-hydroxy-3-(3-methylbut-2-enyl)benzoic acid	4.36235	207.102	9758.48	92645.3	555.276	[M+H]+	Postive	LBSJJNAMGVDGCU-UHFFFAOYSA-N	Benzenoids	Benzene and substituted derivatives	-1	-1	-1	207.06363:400 207.10168:24360 208.10452:3514 209.04749:325 209.08054:210 209.12447:490 211.09648:374 211.1335:919 212.01808:268		852.212
Tyr-Tyr-Tyr	10.8973	506.193	9747.05	91950.6	551.112	[M-H]-	Negative	RMRFSFXLFWWAJZ-UHFFFAOYNA-N	Organic acids and derivatives	Carboxylic acids and derivatives	-1	-1	-1	506.19296:23142 506.3056:256 507.19562:6124 507.27237:472 507.30362:255 508.20139:965 509.15646:339	61.98807:5522	964.149
Tyramine	2.11993	138.091	4381.46	90657.6	543.363	[M+H]+	Postive	DZGWFCGJZKJUFP-UHFFFAOYSA-N	Benzenoids	Benzene and substituted derivatives	880	323.737	500	137.96404:686 138.05527:399 138.09084:5475 138.96831:200 139.07361:303 139.09082:361 139.96062:358 139.98508:231 140.95038:937 141.93431:336 141.95738:4080 141.99242:648 142.97681:747 143.00069:8235	138.09167:1015	993.663
Xanthotoxin	0.72145	215.033	9530.81	90634.7	543.226	[M-H]-	Negative	QXKHYNVANLEOEG-UHFFFAOYSA-N	Phenylpropanoids and polyketides	Coumarins and derivatives	-1	-1	-1	214.94989:224 215.03276:25153 215.11086:396 215.27022:200 216.03702:2315 216.08846:328 216.92068:215 217.00273:24544 217.02869:10703 218.00551:1189 218.03101:788 219.0065:820 219.04826:799 219.97417:352 220.00078:243	59.01389:4525 93.03436:255 156.98076:994 173.04454:241	959.456
Arabitol	0.72145	151.06	9347.58	90441.1	542.065	[M-H]-	Negative	HEBKCHPVOIAQTA-UHFFFAOYNA-N	Organic oxygen compounds	Organooxygen compounds	-1	-1	-1	151.06038:18065 151.10602:373 152.03362:340 152.06334:1577 153.01862:3895 153.06221:452 154.01964:352 154.05962:531 155.00107:363 155.02385:278 155.05576:252 156.02953:453 156.03809:395	55.01904:383 59.0141:1682 71.01389:1143	930.991
3,9,10-trihydroxy-4-(methoxymethyl)-1,7-dimethyl-6-oxobenzo[b][1,4]benzodioxepine-2-carboxylic acid	4.08207	377.084	8913.99	90200.3	540.622	[M+Na]+	Postive	FXGOBECSEIQDAS-UHFFFAOYSA-N	Phenylpropanoids and polyketides	Depsides and depsidones	-1	-1	-1	377.08347:18134 378.08618:3455 379.08847:664 381.11456:3487 381.17334:316		983.75
8-(2-hydroxy-3-methylbut-3-enyl)-7-methoxychromen-2-one	7.84435	243.101	10108.8	90184.7	540.529	[M+H]+	Postive	SQSRYWNOKPJENY-UHFFFAOYSA-N	Phenylpropanoids and polyketides	Coumarins and derivatives	-1	-1	-1	243.06049:236 243.1011:24065 244.10454:4255 245.08182:368 245.10905:507 247.13091:457 247.95985:213	211.07202:607 212.07999:651 243.10042:804	971.045
4-[[2-(8-methoxy-4-methyl-6-oxobenzo[c]chromen-3-yl)oxypropanoylamino]methyl]cyclohexane-1-carboxylic acid	10.8026	468.197	9930.37	90138.9	540.255	[M+H]+	Postive	UNQWRJQUEITUOQ-UHFFFAOYNA-N	Phenylpropanoids and polyketides	Coumarins and derivatives	-1	-1	-1	468.19714:21370 469.19879:3270 469.25595:454 470.20871:456 470.25775:301 471.20654:219 471.27112:449 471.34647:269 472.34012:218		974.712
Ozagrel	4.50548	229.096	10655.9	89855.9	538.558	[M+H]+	Postive	SHZKQBHERIJWAO-AATRIKPKSA-N	Phenylpropanoids and polyketides	Cinnamic acids and derivatives	-1	-1	-1	229.09644:16358 229.14146:1106 230.09912:1793 230.1463:238 231.1001:827 233.98003:322	91.05291:324	969.083
LPC 18:2; PlaSMA ID-2754	11.7994	520.339	9376.7	88826.8	532.39	[M+H]+	Postive	SPJFYYJXNPEZDW-UHFFFAOYNA-N	Lipids and lipid-like molecules	Glycerophospholipids	-1	-1	-1	520.33936:21908 521.34332:5351 522.34247:940 523.33936:213		970.843
phenyl(piperidin-1-yl)methanone	2.89857	190.122	4315.45	88590.8	530.975	[M+H]+	Postive	YXTROGRGRSPWKL-UHFFFAOYSA-N	Benzenoids	Benzene and substituted derivatives	-1	-1	-1	189.97078:801 189.99016:378 190.08444:325 190.12207:5102 190.62401:1322 190.94409:222 191.01221:386 191.04826:403 191.12175:1955 191.62137:389 192.10281:1438 192.13416:227 193.00996:347 193.05649:335 193.10623:261 193.92175:243 194.08308:333 194.11745:321 194.96556:491 195.02519:418		989.49
FA 18:1+2O; PlaSMA ID-662	8.87552	313.237	5174.06	88526.7	530.591	[M-H]-	Negative	CQSLTKIXAJTQGA-UHFFFAOYNA-N	Lipids and lipid-like molecules	Fatty Acyls	-1	-1	-1	313.23685:9072 314.24109:1735	201.11378:240	922.226
7-[(2S,3R,4S,5S,6R)-4,5-dihydroxy-6-(hydroxymethyl)-3-[(2S,3R,4R,5R,6S)-3,4,5-trihydroxy-6-methyloxan-2-yl]oxyoxan-2-yl]oxy-5-hydroxy-2-phenylchromen-4-one	5.70538	563.176	8464.89	86986.7	521.361	[M+H]+	Postive	IJJFWUJRFABXCN-UHFFFAOYNA-N	Phenylpropanoids and polyketides	Flavonoids	-1	-1	-1	563.17578:15631 564.17792:4885 565.18127:870 565.31604:263 566.18958:345 567.18237:645		746.483
Isoflavone base + 1O, 1MeO, O-Pen-Hex; PlaSMA ID-1538	5.67467	561.161	7933.5	85866.4	514.646	[M-H]-	Negative	NATAJDBKBAPGCB-UHFFFAOYNA-N			-1	-1	-1	561.10291:513 561.16089:21309 561.25464:5254 562.16547:6153 562.26062:2246 563.04907:232 563.1698:997 563.26294:662 564.1712:208 564.22937:6978 565.18524:447 565.23309:1674	89.02368:293 269.04236:517 309.07861:301 503.24982:321	909.276
(2S,3S,4S,5R,6S)-6-(2,4-dihydroxy-3,6-diphenylphenoxy)-3,4,5-trihydroxyoxane-2-carboxylic acid	10.4929	453.118	2369.79	85000	509.454	[M-H]-	Negative	QQDLPJHEFJKVHT-MJRVOHGCSA-N	Benzenoids	Benzene and substituted derivatives	-1	-1	-1	452.96552:259 453.11746:2649 454.12305:487 455.11728:313 457.11829:220	112.98544:833	957.124
5-Methoxytryptophol	4.4558	192.102	11112.4	84986.8	509.375	[M+H]+	Postive	QLWKTGDEPLRFAT-UHFFFAOYSA-N	Organoheterocyclic compounds	Indoles and derivatives	-1	-1	-1	191.96848:221 191.98683:204 192.1017:21716 192.15257:505 193.00891:259 193.08266:390 193.10416:1903 193.14413:862 194.08316:244 194.11304:248 194.96431:415 195.10184:1243 196.10405:233 196.5154:593 197.03516:201 197.08046:1887	148.07411:204 149.0806:345 177.07814:2529 178.08107:364 192.10167:1189	956.951
Osthole; PlaSMA ID-1020	8.841	245.115	9094.2	84561.1	506.823	[M+H]+	Postive	MBRLOUHOWLUMFF-UHFFFAOYSA-N	Phenylpropanoids and polyketides	Coumarins and derivatives	-1	-1	-1	245.07867:321 245.11546:17912 245.19141:316 246.11879:2307 247.07607:388 247.12991:636 249.07152:575 249.15587:508		888.026
Hydroxygardnutine	5.38685	339.171	9823.3	84266.3	505.056	[M+H]+	Postive	OUONWRIEOZGMSQ-NUUNSNFRSA-N			-1	-1	-1	339.1366:273 339.17084:23920 339.34659:347 340.11826:581 340.1738:4898 341.142:1161 341.1745:1000 342.13696:340 342.17059:8576 343.1123:293 343.17358:1819 344.14365:290		939.865
7-hydroxy-2-(4-hydroxy-3,5-dimethoxyphenyl)-5-[(2S,3R,4S,5S,6R)-3,4,5-trihydroxy-6-(hydroxymethyl)oxan-2-yl]oxychromen-4-one	6.28117	491.12	9070.18	84253.5	504.98	[M-H]-	Negative	FLSOTPIEFVBPBU-LDBVRRDLSA-N	Phenylpropanoids and polyketides	Flavonoids	662.865	675.446	500	491.12039:21477 491.2861:421 492.12405:4744 492.71802:240 493.07236:217 493.12579:1472 494.22668:203	314.0416:243 329.06616:252 476.09778:1067 477.10394:550 491.12039:3383	993.76
methyl 4-hydroxy-3-(4-hydroxyphenyl)-2-[(4-hydroxyphenyl)methyl]-5-oxofuran-2-carboxylate	6.11273	401.087	8148.07	83882.7	502.757	[M-H]-	Negative	AEKPZNDJHWFONI-UHFFFAOYNA-N	Lipids and lipid-like molecules	Fatty Acyls	-1	-1	-1	400.63962:207 401.08734:23279 402.09085:4607 402.17654:616 403.09183:936 403.62701:214 404.09296:205 404.19159:319		966.367
Caseadine	5.67423	342.171	8456.52	83325.9	499.42	[M+H]+	Postive	HXHKKYNHNQVAAX-HNNXBMFYSA-N	Alkaloids and derivatives	Protoberberine alkaloids and derivatives	773.516	721.935	428.571	342.13235:312 342.17084:20107 343.14142:355 343.17303:4036 344.12097:241 344.18042:449 344.62704:289 345.13229:1659 345.6286:1224 346.11859:4800 346.62128:1799 347.11569:453	91.05344:213 163.06329:546 176.06903:337 178.08575:3501 179.09004:242	992.688
1,4-Cyclohexanedione	1.96422	113.059	4506.32	83300.5	499.268	[M+H]+	Postive	DCZFGQYXRKMVFG-UHFFFAOYSA-N	Organic oxygen compounds	Organooxygen compounds	-1	-1	-1	112.95638:711 112.9841:368 113.05868:4351 113.93737:258 113.96243:1744 114.0601:484 114.09007:211 114.96612:347 114.98283:1677 115.00436:1182 115.95694:236 116.97501:1267 117.08832:295 117.93376:648	56.94082:263 72.93673:910	950.598
FA 18:4+2O; PlaSMA ID-623	7.35922	307.191	4495.81	83162	498.438	[M-H]-	Negative	KLFMLBSZQZVKDC-UHFFFAOYNA-N	Lipids and lipid-like molecules	Fatty Acyls	-1	-1	-1	307.19107:5109 308.19348:787 308.9209:201 309.11337:749 309.20425:421 310.11453:489 311.09116:285 311.12146:448 311.14828:267 311.18164:224 311.22198:677	235.13292:244	806.525
L-(-)-Phenylalanine	2.15108	166.086	6607.12	82626.8	495.23	[M+H]+	Postive	COLNVLDHVKWLRT-QMMMGPOBSA-N	Organic acids and derivatives	Carboxylic acids and derivatives	-1	-1	-1	166.08636:6891 167.08696:768 168.05064:451 169.09645:231 171.00873:378 171.06377:420	84.96004:276 120.08054:410	988.006
6-methoxy-7-[3,4,5-trihydroxy-6-[(3,4,5-trihydroxy-6-methyloxan-2-yl)oxymethyl]oxan-2-yl]oxychromen-2-one	10.6179	523.139	8739.4	81994.7	491.441	[M+H]+	Postive	FCIZPHNZRNLUJD-UHFFFAOYSA-N	Phenylpropanoids and polyketides	Coumarins and derivatives	-1	-1	-1	523.13953:18843 523.23065:366 523.31708:266 523.70215:223 524.14264:5764 525.14636:1534 525.28546:249 525.31238:280 526.14935:398 527.16864:218 527.26556:639 527.40887:233		990.062
STACHYOSE	0.72145	665.214	8339.13	81797.4	490.259	[M-H]-	Negative	UQZIYBXSHAGNOE-UHFFFAOYSA-N	Organic oxygen compounds	Organooxygen compounds	-1	-1	-1	665.0423:340 665.21399:18113 665.31201:436 666.21735:5517 667.08362:253 667.22058:1941 669.11267:349	59.01319:253 101.02347:271 341.11017:325 383.11798:384 665.21356:2110	975.585
Secoisolariciresinol	7.0223	361.165	8338.15	81706.3	489.713	[M-H]-	Negative	PUETUDUXMCLALY-UHFFFAOYNA-N	Lignans, neolignans and related compounds	Dibenzylbutane lignans	750	750	1000	361.07562:245 361.16504:20811 362.04883:204 362.16861:4693 363.14215:549 363.16922:655 365.19061:254 365.60712:287	361.16525:1764	912.162
5-Benzofuranpropanoic acid, 6-(beta-D-glucopyranosyloxy)-	3.88892	367.103	8290.21	81685.7	489.589	[M-H]-	Negative	OHMWGMHIZWOKHV-USACIQFYSA-N	Organic oxygen compounds	Organooxygen compounds	-1	-1	-1	367.10263:18463 368.10635:3435 369.10959:663	59.01323:457	932.378
3-Methylglutaric acid	0.788833	145.05	6956.69	81340.7	487.522	[M-H]-	Negative	XJMMNTGIMDZPMU-UHFFFAOYSA-N	Lipids and lipid-like molecules	Fatty Acyls	-1	-1	-1	145.01375:1665 145.05035:12588 145.09534:283 146.02269:248 146.05345:1268 146.08069:264 146.96744:258 147.02954:6636 147.06619:2403 148.03308:346 148.06169:236 149.04579:1783 150.04094:373	61.98876:479	985.634
Pregabalin	0.78715	160.133	8577.26	81147.7	486.365	[M+H]+	Postive	AYXYPKUFHZROOJ-ZETCQYMHSA-N	Organic acids and derivatives	Carboxylic acids and derivatives	-1	-1	-1	159.97624:297 160.07123:2295 160.10194:2466 160.133:19885 160.20033:245 161.05461:396 161.11089:269 161.13637:1659 162.05852:209 162.0769:736 162.11848:1289 162.1483:1521 163.04155:300 163.06096:5714 163.12106:1072 163.15103:233 164.07146:892 164.08774:600 164.12447:298 164.9628:338 164.98477:227 165.07347:1850		973.329
1,4-Butynediol	0.75515	85.0295	6685.28	80019.6	479.604	[M-H]-	Negative	DLDJFQGPPSQZKI-UHFFFAOYSA-N	Organic oxygen compounds	Organooxygen compounds	-1	-1	-1	84.95123:511 85.02949:7118 86.0305:877 87.00903:13328 87.04369:456 88.01209:258 88.04018:1227 88.98841:1013 89.02446:82592 90.02797:2363		992.052
Westcort	10.0572	447.274	8139.16	79938.5	479.117	[M+H]+	Postive	FZCHYNWYXKICIO-UHFFFAOYNA-N	Lipids and lipid-like molecules	Steroids and steroid derivatives	-1	-1	-1	447.11908:285 447.27444:15536 448.2345:699 448.27768:4958 449.24814:912 449.28036:1302 450.22961:382 450.27609:233 451.24695:273		960.467
Cyclohexaneacetic acid, 6-[4-(acetyloxy)-3-hydroxy-2-methylene-1-oxobutoxy]-4-ethenyl-2-hydroxy-3-[1-(hydroxymethyl)ethenyl]-4-methyl-alpha-methylene-, methyl ester	5.70538	435.201	5806.96	79415.3	475.981	[M+H]+	Postive	XTMCUUVQSGQNSI-UHFFFAOYSA-N	Lipids and lipid-like molecules	Prenol lipids	-1	-1	-1	435.12042:640 435.20111:7789 436.1615:384 436.20319:2111 436.95126:347 437.21542:2817 438.22244:1087 439.20834:240		986.631
Glycyrrhetinic Acid	11.6722	469.332	8120.33	78878.7	472.765	[M-H]-	Negative	MPDGHEJMBKOTSU-YKLVYJNSSA-N	Lipids and lipid-like molecules	Prenol lipids	750	750	1000	469.16669:263 469.33154:17971 470.16992:205 470.33572:7082 471.34103:814 472.34299:484 473.1553:366 473.21616:308	469.33069:2176	918.746
Feruloyl quinic acid; PlaSMA ID-2056	4.95082	369.119	8963.26	78639.3	471.331	[M+H]+	Postive	RAGZUCNPTLULOL-UHFFFAOYNA-N	Organic oxygen compounds	Organooxygen compounds	-1	-1	-1	369.11868:20969 370.12228:4186 371.12744:737 372.13821:418 373.11746:368		961.253
rel -Methylenedioxy-tetramethoxy-epoxylignan	5.70538	417.19	5424.66	78445.3	470.168	[M+H]+	Postive	RKSBJQZDPAGEQW-UHFFFAOYNA-N	Lignans, neolignans and related compounds	Furanoid lignans	-1	-1	-1	417.15152:593 417.19006:6996 418.19263:2195 419.13116:400 419.16537:1085 419.20618:6810 420.20706:1584 421.21106:305 421.6503:209 422.06238:412		963.223
O-Toluidine	0.942883	107.069	6201.17	77909.1	466.954	[M+H]+	Postive	RNVCVTLRINQCPJ-UHFFFAOYSA-N	Benzenoids	Benzene and substituted derivatives	-1	-1	-1	107.04382:2321 107.06921:9955 107.52573:202 108.0434:375 108.0761:388 109.02873:294 109.07289:240 110.00549:208 110.05877:753 110.97459:347 111.04646:927 111.07551:224 111.96542:276 111.98237:561 112.0374:418 112.04607:376		964.225
Imiquimod	1.19208	241.143	4558.45	77809.8	466.359	[M+H]+	Postive	DOUYETYNHWVLEO-UHFFFAOYSA-N	Organoheterocyclic compounds	Quinolines and derivatives	-1	-1	-1	240.93694:237 241.11334:354 241.14326:6701 241.94264:317 242.12558:236 242.14648:718 243.12398:277 245.01872:630 245.1506:216 245.3837:224 245.94826:231 246.08382:257 246.1218:277		990.725
Humantenine	7.25257	355.202	9046.94	77621	465.227	[M+H]+	Postive	SJKRPUOXUNOPOP-HEXYGZIHSA-N	Alkaloids and derivatives	Gelsemium alkaloids	-1	-1	-1	355.11832:5148 355.20221:19714 356.12289:1254 356.20496:3823 357.1326:809 357.16379:496 357.20428:497 358.13553:222 358.2222:275		969.277
(2-hydroxy-3,6-diphenylcyclohexyl) acetate	5.54963	328.191	10000.6	77351.4	463.611	[M+H]+	Postive	RRGRXDIGPVAQIW-UHFFFAOYNA-N	Organic oxygen compounds	Organooxygen compounds	-1	-1	-1	328.11276:662 328.19073:21847 328.27859:210 329.15231:263 329.19434:4660 330.13284:542 330.19714:838 330.21686:455 331.11691:867 332.11478:305 333.09363:375 333.12012:303	58.06467:688	964.711
MLS001032112-01	7.84435	242.093	8282.35	77239	462.938	[M+H]+	Postive	VBIZUNYMJSPHBH-UHFFFAOYSA-N	Organoheterocyclic compounds	Pyridines and derivatives	-1	-1	-1	242.00558:220 242.09314:16945 243.06049:236 243.1011:24065 244.10454:4255 245.08182:368 245.10905:507		976.818
Dicyclopenta[a,i]phenanthrene-3a(1H)-carboxylic acid, 10-formyloctadecahydro-9-hydroxy-5a,5b,8,8,10a-pentamethyl-1-(1-methylethenyl)-	9.18358	453.336	9119.84	77220.7	462.828	[M+H]+	Postive	SLWJVQQNDGLXTK-UHFFFAOYNA-N	Lipids and lipid-like molecules	Prenol lipids	-1	-1	-1	453.16846:1457 453.21036:528 453.33627:14264 454.16779:344 454.34052:4216 455.34766:1465	137.12956:216 453.33463:474	970.261
Arabinose	0.72145	149.046	7746.73	77159.5	462.461	[M-H]-	Negative	PYMYPHUHKUWMLA-UHFFFAOYNA-N	Organic oxygen compounds	Organooxygen compounds	-1	-1	-1	149.04547:14233 150.04836:801 151.06096:22545 152.06427:712 153.01765:582 153.06369:237 154.01352:296		951.998
4-Hydroxy-4-methyl-2-pentanone	3.68668	115.076	7911.06	76813.9	460.39	[M-H]-	Negative	SWXVUIWOUIDPGS-UHFFFAOYSA-N	Organic oxygen compounds	Organooxygen compounds	-1	-1	-1	114.93597:3168 115.00264:352 115.01682:209 115.03973:256 115.07632:18800 115.11648:467 116.07967:1021 116.93395:1278 117.01892:378 118.02672:213 119.03751:969		971.686
Methyl-beta-galactopyranoside	0.72145	193.071	7690.01	76589.2	459.043	[M-H]-	Negative	HOVAGTYPODGVJG-UHFFFAOYNA-N	Organic oxygen compounds	Organooxygen compounds	-1	-1	-1	192.95859:534 193.03424:2164 193.07155:17816 194.07564:994 194.93288:260 194.95241:239 194.99637:612 195.05115:5382 196.05745:603 196.98238:336 197.01726:234 197.05438:292	59.01362:697 71.013:321 75.00778:257 79.01727:207 85.02937:284	960.525
Glyceric acid	0.68775	105.019	7684.69	76569	458.922	[M-H]-	Negative	RBNPOMFGQQGHHO-UHFFFAOYNA-N	Organic oxygen compounds	Organooxygen compounds	-1	-1	-1	104.7926:266 105.01922:15467 105.95943:397 106.02205:549 108.02106:315 108.04361:387 108.90118:899 109.02854:344		961.334
Uridine	6.67135	171.149	5970.25	76321.7	457.44	[M+H]+	Postive	DRTQHJPVMGBUCF-XVFCMESISA-N	Nucleosides, nucleotides, and analogues	Pyrimidine nucleosides	-1	-1	-1	171.06561:215 171.1004:366 171.14926:8517 171.94543:276 171.9814:304 172.1312:231 172.15149:886 172.95477:510 172.97304:352 173.13148:355 173.9818:266 173.99701:225 174.15912:1703 175.01762:1301 175.15086:293 175.97603:1851		901.585
Crotetamide	3.58377	227.175	6406.45	76315.8	457.404	[M+H]+	Postive	LSAMUAYPDHUBQD-RMKNXTFCSA-N	Organic acids and derivatives	Carboxylic acids and derivatives	-1	-1	-1	227.1752:14136 228.17883:2165 229.08163:422 229.09923:250 230.90105:209 231.10182:236 231.17113:579 232.13155:981 232.17305:288	56.96425:235 114.0914:4278 115.09412:535	870.442
(2S,3R,4S)-4-(2-{[(2E)-3-(3,4-Dihydroxyphenyl)-2-propenoyl]oxy}ethyl)-2-(beta-D-glucopyranosyloxy)-3-vinyl-3,4-dihydro-2H-pyran-5-carboxylic acid	5.67423	577.135	8598.66	75480.6	452.398	[M+H]+	Postive	ZPEFYJBGAZLAKK-CPYBZULYSA-N	Lipids and lipid-like molecules	Prenol lipids	-1	-1	-1	577.13464:18573 577.22968:1275 578.13702:5748 579.14148:1345 579.23938:390 580.2442:254 581.15112:208 581.26172:993		991.037
Eupatilin	10.3918	343.082	6387.56	75220.7	450.841	[M-H]-	Negative	DRRWBCNQOKKKOL-UHFFFAOYSA-N	Phenylpropanoids and polyketides	Flavonoids	-1	-1	-1	343.08179:8856 344.08472:1541 345.14651:271 346.87106:413 347.06464:203 347.1282:735 347.18613:312	242.02202:1494 270.01547:306	835.438
Retinoic acid	12.6157	299.201	7546.99	74297.3	445.306	[M-H]-	Negative	SHGAZHPCJJPHSC-UHFFFAOYSA-N	Lipids and lipid-like molecules	Prenol lipids	-1	-1	-1	299.20087:16091 299.25391:585 300.20453:4708 301.17444:238 301.20679:294	299.2002:3377	968.987
NCGC00385791-01	6.5468	581.259	6992.07	74219.6	444.841	[M+H]+	Postive	XYUXECAMXQZDMY-UHFFFAOYSA-N	Lipids and lipid-like molecules	Steroids and steroid derivatives	-1	-1	-1	581.1842:297 581.25897:8816 582.26135:3746 583.2644:660 584.20044:231 585.1579:746 585.2204:308 585.27576:254 586.16302:331 586.22223:220		987.133
(4S,5Z,6S)-4-(2-methoxy-2-oxoethyl)-5-[2-[(E)-3-phenylprop-2-enoyl]oxyethylidene]-6-[(2S,3R,4S,5S,6R)-3,4,5-trihydroxy-6-(hydroxymethyl)oxan-2-yl]oxy-4H-pyran-3-carboxylic acid	6.32888	551.177	18605.8	74200.4	444.726	[M+H]+	Postive	JGHUOJAZXGSFRI-HOWDAYCMSA-N	Lipids and lipid-like molecules	Prenol lipids	-1	-1	-1	551.17688:20757 552.1806:5139 553.18201:1175 554.18011:252 554.21814:523 555.20026:311	257.08096:3421 258.08395:986	681.07
7,8-Dihydroxycoumarin; PlaSMA ID-189	4.428	177.019	3825.64	74075	443.974	[M-H]-	Negative	ATEFPOUAMCWAQS-UHFFFAOYSA-N	Phenylpropanoids and polyketides	Coumarins and derivatives	-1	-1	-1	177.01945:3308 177.05653:554 178.02292:381 179.03577:1502 182.01926:214	105.03385:374 150.0338:213 151.0403:237	781.773
PHENYLACETIC ACID	5.27033	135.045	7736.35	74009.9	443.584	[M-H]-	Negative	WLJVXDMOQOGPHL-UHFFFAOYSA-N	Benzenoids	Benzene and substituted derivatives	-1	-1	-1	134.8643:415 135.04507:20098 135.97073:1601 136.01625:4895 136.04904:1870 136.99565:205 137.02368:4471 138.02917:485		982.405
Furostane base -1H2O -2H + 1O, O-Hex, O-Pen-dHex; PlaSMA ID-3407	12.9517	871.482	8098.37	73895.7	442.9	[M+H]+	Postive	IUJLIWQDGYFELW-UHFFFAOYNA-N	Lipids and lipid-like molecules	Steroids and steroid derivatives	-1	-1	-1	871.48199:18622 871.60864:209 872.41565:223 872.48523:9197 873.48608:1873 874.44244:259 874.48657:761 875.48029:405		984.033
3,4-Dihydroxyphenylacetic acid	2.57475	167.035	3904.77	72499.4	434.531	[M-H]-	Negative	CFFZDZCDUFSOFZ-UHFFFAOYSA-N	Benzenoids	Phenols	-1	-1	-1	166.8945:350 167.03474:4649 168.04047:610 168.88707:4631 169.01343:279 169.05209:229 170.83186:266 170.88449:979	61.98745:580 122.8928:1001 134.86377:234	976.068
Spiro[3H-1,4-benzodiazepine-3,2'-oxirane]-2,5(1H,4H)-dione, 3'-(3-hydroxyphenyl)-4-methyl-, (3S,3'R)-	1.86715	355.093	2282.6	72082.9	432.035	[M-H]-	Negative	BDDNYDPRCCDQQJ-UHFFFAOYNA-N	Organoheterocyclic compounds	Benzodiazepines	-1	-1	-1	355.09344:2622		865.648
7-(3,4-dihydroxyphenyl)-5-hydroxy-2,2-dimethyl-10-(3-methylbut-2-enyl)pyrano[3,2-g]chromen-6-one	13.7774	421.164	8774.66	71619.1	429.254	[M+H]+	Postive	PSEBCAMYGWGJMH-UHFFFAOYSA-N	Phenylpropanoids and polyketides	Isoflavonoids	-1	-1	-1	421.16418:22645 422.16711:6639 423.17139:959 424.28418:263 425.21512:251		949.272
Ketoprofen	10.4592	253.087	7290.65	70294.3	421.314	[M-H]-	Negative	DKYWVDODHFEZIM-UHFFFAOYNA-N	Benzenoids	Benzene and substituted derivatives	-1	-1	-1	253.08682:17071 253.14221:459 253.62575:200 254.08981:2062 255.10054:2157 255.23328:1106 256.0657:252 256.10706:484 257.03284:244 257.06427:304	195.04431:2744 197.05762:219 198.06343:221	997.237
Carboxyibuprofen	7.3929	235.097	7139.56	70103.6	420.171	[M-H]-	Negative	DIVLBIVDYADZPL-UHFFFAOYSA-N	Phenylpropanoids and polyketides	Phenylpropanoic acids	-1	-1	-1	234.97794:347 235.09718:17293 236.09995:2213 237.10329:500 238.02623:258 239.12624:335	119.69775:256 158.07214:396 164.04752:289 205.0847:266 217.08727:552	964.239
Phosphatidylglyceride 16	14.9407	745.501	4841.14	70001.6	419.56	[M-H]-	Negative	SHHLVVJXLWXVNI-BAOXYHDDNA-N	Lipids and lipid-like molecules	Glycerophospholipids	-1	-1	-1	745.42816:246 745.50153:8967 746.50537:4325 747.51208:1040 748.51624:421 749.53033:344 750.48877:514	680.953:215 745.50018:649	969.037
3-((3'-Malonyl)Xyl)-28-Glu-2-hydroxy oleanolic acid	11.3016	851.442	6201.86	69902.2	418.964	[M-H]-	Negative	SEQLVCABILROHV-BAEYDANMSA-N	Lipids and lipid-like molecules	Prenol lipids	-1	-1	-1	851.44183:13370 852.44666:6782 853.45703:10337 854.45929:4511 855.46222:1172	59.01363:2031 99.04561:426	968.713
Naringenin	11.6748	273.076	7520.02	69512.9	416.631	[M+H]+	Postive	FTVWIRXFELQLPI-ZDUSSCGKSA-N	Phenylpropanoids and polyketides	Flavonoids	750	744.162	500	273.07574:17524 273.13254:503 273.16241:312 274.0788:3819 274.27676:246 275.07877:317 275.2063:215 275.23489:334 277.1427:511 277.20895:555	273.07458:219	993.788
4-Aminomethylcyclohexanecarboxylic acid	0.8183	158.117	7643.04	69236.2	414.972	[M+H]+	Postive	GYDJEQRTZSCIOI-LJGSYFOKSA-N	Organic acids and derivatives	Carboxylic acids and derivatives	-1	-1	-1	158.0024:982 158.04874:728 158.09151:4359 158.11649:17232 158.4799:315 158.97339:4703 159.05675:684 159.09654:636 159.12148:3477 159.98729:454 160.02011:685 160.06679:1339 160.10545:2908 160.13223:17195 160.94627:222 160.98608:316 161.04173:521 161.06049:335 161.10378:314 161.1356:1587 161.99522:291 162.01534:338 162.05533:282 162.07657:964 162.1234:1112 162.1452:433 163.07043:1423		920.108
L-Asparagine	0.724867	133.061	7650.72	68963.7	413.339	[M+H]+	Postive	DCXYFEDJOCDNAF-REOHCLBHSA-N	Organic acids and derivatives	Carboxylic acids and derivatives	-1	-1	-1	133.06143:15509 133.10301:463 134.04575:5132 134.07849:885 134.11765:4527 135.04668:246 135.06548:2783 135.12103:352 136.04913:366 138.05524:16329	74.02351:1034	860.768
2-(2-hydroxypropan-2-yl)-3-[(2R,3R,4S,5S,6R)-3,4,5-trihydroxy-6-(hydroxymethyl)oxan-2-yl]oxy-2,3-dihydrofuro[3,2-g]chromen-7-one	4.49538	469.135	6402.49	68355	409.691	[M-H]-	Negative	HGHSJJSYVZPIAW-NWMIEQKASA-N	Phenylpropanoids and polyketides	Coumarins and derivatives	-1	-1	-1	469.13489:14402 470.13782:2861 471.14105:647 472.14203:256 473.10754:2918 474.11102:733	117.06996:658 161.06021:2038 205.05115:1154	912.14
Codeine	4.50548	300.159	10975.6	68321.2	409.488	[M+H]+	Postive	OROGSEYTTFOCAN-DNJOTXNNSA-N	Alkaloids and derivatives	Morphinans	-1	-1	-1	300.15881:18563 301.16153:4143 302.04465:460 302.16528:555 302.1954:319		939.027
FA 9:1+1O; PlaSMA ID-163	4.3943	171.102	5771.43	67844	406.628	[M-H]-	Negative	WLGDDELKYAWBBL-UHFFFAOYSA-N	Lipids and lipid-like molecules	Fatty Acyls	-1	-1	-1	171.04379:270 171.06464:466 171.10233:11877 171.15121:211 172.10626:1576 172.9637:205 173.021:1497 174.9917:1214 175.02562:331 175.04385:337 175.0751:211	144.04372:220	982.305
Modafinil	0.84945	274.091	4900.77	66447.8	398.26	[M+H]+	Postive	YFGHCGITMMYXAQ-UHFFFAOYNA-N	Benzenoids	Benzene and substituted derivatives	-1	-1	-1	274.00818:263 274.09067:9941 274.13397:3006 274.19135:296 274.27344:538 275.09543:1649 275.12781:1144 275.15729:728 275.99432:514 276.13928:1212 276.99973:568 277.01968:353 277.09256:400 277.14584:265 277.9342:819 277.97055:354 278.06058:249 278.08374:611 278.12109:1800 278.15802:342 278.20761:240 278.99478:242 279.03244:372 279.06631:509	69.03326:228 97.02764:478	987.654
1-methyl-9H-pyrido[3,4-b]indole-3-carboxylic acid	4.7328	227.082	6588.96	66322.6	397.509	[M+H]+	Postive	MFEZJNMQTQMDRQ-UHFFFAOYSA-N	Alkaloids and derivatives	Harmala alkaloids	-1	-1	-1	227.08203:9638 227.16991:388 228.08398:1262 229.08916:360 231.09946:470		888.905
N4-Acetylsulfamethazine	7.08388	321.1	10764.6	66152.5	396.49	[M+H]+	Postive	LJKAKWDUZRJNPJ-UHFFFAOYSA-N	Benzenoids	Benzene and substituted derivatives	139.442	750	1000	320.85568:202 321.10034:12212 322.10492:3341 325.10852:235	292.09738:1529 293.09991:221 295.11633:274 304.09641:237 307.0787:292 320.08929:734 321.09534:704	895.121
FAHFA 36:4	15.1092	557.46	5983.03	65715.8	393.873	[M-H]-	Negative	LVSDTHYODIMZIS-ZDMOZKBQNA-N			-1	-1	-1	557.46033:11143 557.85626:410 558.46283:3275 558.86066:1104 559.30756:1891 559.46466:1586 559.85962:389 559.94031:369 560.31061:605 560.46588:378 560.87207:1747 561.30676:957 561.35468:1058 561.93884:710 562.31:374 562.35712:840	61.98836:369 248.97313:229	877.472
Carboline base + 4H, carboxylic acid; PlaSMA ID-805	2.4314	217.104	5090.43	65411.8	392.05	[M+Na]+	Postive	FSNCEEGOMTYXKY-UHFFFAOYNA-N	Organoheterocyclic compounds	Indoles and derivatives	-1	-1	-1	217.01605:413 217.10416:5721 217.15903:272 218.03203:1690 218.10451:569 218.17468:232 219.0047:366 219.11493:614 219.96617:2035 220.11749:1445 221.11829:313		969.073
Flavanone base + 4O, 2Prenyl; PlaSMA ID-2313	12.2043	425.197	7049.5	65329	391.554	[M+H]+	Postive	HCBKENVWCDLQOA-UHFFFAOYNA-N	Phenylpropanoids and polyketides	Flavonoids	-1	-1	-1	425.19669:13338 425.22998:7658 426.19907:3498 426.23413:2046 427.2016:590 427.23962:678 427.28186:925 428.2887:511 429.16803:247 429.21027:245 429.2926:222		979.08
4,4-bis(6,8-dihydroxy-3-methyl-1-oxoisochromen-7-yl)-2-methoxybutanoic acid	6.07577	499.123	11515.4	65221	390.907	[M+H]+	Postive	DYFXVIVUWANJGN-UHFFFAOYSA-N	Phenylpropanoids and polyketides	Isocoumarins and derivatives	-1	-1	-1	499.12317:17603 500.12561:4743 501.12933:892 502.1842:334 503.18985:237	145.02759:293 163.03908:1086	958.999
2-acetyl-4-[(3-butanoyl-2,4,6-trihydroxy-5-methylphenyl)methyl]-3,5-dihydroxy-6,6-dimethylcyclohexa-2,4-dien-1-one	7.35922	417.154	6872.25	65095	390.152	[M-H]-	Negative	PPRFIMGXDRYLGD-UHFFFAOYSA-N	Organic oxygen compounds	Organooxygen compounds	-1	-1	-1	417.12006:10628 417.15424:17446 417.23096:621 417.3215:279 418.12305:3373 418.15704:4236 419.1333:1256 419.16119:1171 420.13693:401 420.63766:238 421.14374:281	181.05017:1204 387.10406:218 402.13467:205	948.889
Dehydrocorydaline	7.22142	366.169	6769.36	64943	389.241	[M]+	Postive	RFKQJTRWODZPHF-UHFFFAOYSA-N	Alkaloids and derivatives	Protoberberine alkaloids and derivatives	353.69	729.569	500	366.16891:10253 367.17261:2775 367.20667:2616 368.17392:615 368.21054:635 368.24365:277 369.12857:357 369.1778:891 369.21732:16546 370.16489:397 370.21988:3551	332.12598:216 333.1312:335 334.14114:220 336.12439:698 351.14575:388 352.14673:232 366.17096:1729	996.165
4-Hexylresorcinol	2.4314	195.122	4738.63	64886.3	388.901	[M+H]+	Postive	WFJIVOKAWHGMBH-UHFFFAOYSA-N	Benzenoids	Phenols	-1	-1	-1	194.96791:494 195.0002:353 195.02786:446 195.12233:5920 196.09547:471 196.12621:573 196.95712:258 197.00641:379 197.05647:316 197.08055:270 198.11151:221 199.00465:384 199.97469:347 200.00018:938		981.206
Clindamycin	9.4966	425.183	7479.83	64776.8	388.244	[M+H]+	Postive	KDLRVYVGXIQJDK-NOWPCOIGSA-N	Organic acids and derivatives	Carboxylic acids and derivatives	750	745.546	500	425.1835:16783 426.18842:4426 426.25168:244 427.18558:437 427.23798:230 429.15234:207 429.2616:595	425.18472:2240	994.274
alpha-Lapachone	8.59185	243.101	7211.33	64750.6	388.087	[M+H]+	Postive	PJWHOPKRRBUSDH-UHFFFAOYSA-N	Organoheterocyclic compounds	Naphthopyrans	-1	-1	-1	243.10078:16324 243.1712:441 244.10405:1764 244.1899:409 245.10378:234 245.91628:273 247.95831:330	182.07162:278 201.04819:210 228.07712:352 243.10075:341	946.09
NCGC00380132-01	8.06238	221.071	7223.43	64749.7	388.082	[M+H]+	Postive	ZERVJPYNQLONEK-UHFFFAOYSA-N	Alkaloids and derivatives	Indolonaphthyridine alkaloids	-1	-1	-1	221.07071:17574 221.15312:893 221.19051:263 222.07425:2443 222.10814:458 223.07037:349 223.09467:465 223.98796:309 224.12833:520	97.94588:206 137.96346:273 141.93561:278 221.07166:835	990.386
N-Acetylglutamic acid	0.65405	188.056	6831.67	64320.8	385.512	[M-H]-	Negative	RFMMMVDNIPUKGG-UHFFFAOYNA-N	Organic acids and derivatives	Carboxylic acids and derivatives	609.527	725.911	666.667	188.0262:785 188.05644:10818 188.97054:759 189.00317:7498 189.03943:1560 189.05623:1224 189.07265:812 190.00766:444 190.05566:283 191.02095:1617 191.05582:44450 192.05963:4231 192.91063:3310 192.95956:569 192.97786:501 193.03487:2407	59.0138:421 100.07539:424 102.05535:289 128.03467:464	770.042
Phosphomycin	14.6037	136.997	2372.33	63952.3	383.303	[M-H]-	Negative	YMDXZJFXQJVXBF-STHAYSLISA-N	Organic acids and derivatives	Organic phosphonic acids and derivatives	-1	-1	-1	136.86234:498 136.89149:2252 136.94107:415 136.974:1527 136.99669:2784 137.02379:2064 137.89104:698 137.93958:1929 137.96713:1836 137.98331:1658 138.0284:337 138.94131:298 138.97168:1398 139.00545:1484 139.99706:204 140.9852:387 141.02145:434 141.92317:1461	95.97236:230 111.93664:464	988.608
1,1,5a,7a,9,11b-Hexamethyl-7-methylene-3,8,11-trioxo-3,5a,5b,6,7,7a,8,9,11,11a,11b,12,13,13a-tetradecahydro-1H-isochromeno[7,8-g][2]benzoxepin-12-yl acetate	9.87035	459.238	6659.18	63827.9	382.557	[M+H]+	Postive	JFYYCQXZVIOBKU-UHFFFAOYSA-N	Organoheterocyclic compounds	Naphthopyrans	-1	-1	-1	459.13461:228 459.23816:13420 459.30835:443 460.24136:4042 461.2457:1259 461.30652:258 463.17288:321 463.25922:202		675.949
MLS001143521-01	7.90665	349.2	4418.65	63626.6	381.35	[M+H]+	Postive	HDHVLYXLWIMGEO-UHFFFAOYNA-N	Lipids and lipid-like molecules	Prenol lipids	-1	-1	-1	349.1998:7528 350.2034:1854 351.09799:238 351.21326:5556 352.15353:6743 352.21661:883 353.15982:1206 353.22604:818 354.09567:315		993.112
Dicoumaroyl Spermidine; PlaSMA ID-2388	5.32457	438.24	7224.36	63230.7	378.978	[M+H]+	Postive	QYBCBMVQSCJMSA-UHFFFAOYSA-N	Benzenoids	Benzene and substituted derivatives	-1	-1	-1	437.95932:486 438.23996:19068 438.95154:312 439.10028:1116 439.14005:418 439.2428:4469 440.24503:668		960.519
beta;-Carboline-3-carboxylic acid N-methylamide	0.880583	226.102	5153.24	63171.7	378.624	[M+H]+	Postive	LTODWURWNDCSOY-UHFFFAOYSA-N	Organoheterocyclic compounds	Indoles and derivatives	-1	-1	-1	225.97845:209 226.06711:683 226.10208:6834 227.10335:678 227.1369:241 227.97781:321 228.08945:388 228.19493:344 228.97824:239 229.15401:3248 229.94904:368 229.97369:2586 230.10284:293 230.13983:1539 231.01703:2636 231.08101:276		873.063
Malonic acid	0.65405	103.004	6078.46	62694.4	375.764	[M-H]-	Negative	OFOBLEOULBTSOW-UHFFFAOYSA-N	Organic acids and derivatives	Carboxylic acids and derivatives	-1	-1	-1	103.00378:10612 103.03874:829 104.7926:266 105.01922:15467 105.95943:397 106.02205:549	59.01334:370	931.118
C50H64O14	12.36	889.436	6768.77	62466.7	374.399	[M+H]+	Postive	GOMGANBHXVPZLC-UHFFFAOYNA-N	Lipids and lipid-like molecules	Prenol lipids	-1	-1	-1	889.43597:15117 890.43988:6420 891.44275:3636 892.44537:1121 893.4339:515 894.43274:326		965.255
7-amino-8-(2,4-dihydroxy-6-methylphenyl)-1,9-dimethyl-3H-phenoxazin-3-one	6.12492	363.135	8916.65	62361.1	373.766	[M+H]+	Postive	NNZHGEUZKBYASA-UHFFFAOYSA-N	Organoheterocyclic compounds	Benzoxazines	665.902	726.285	500	363.13458:17758 364.13763:3494 365.1467:1973 366.1319:542 366.1524:597 367.1601:325 367.21173:259 368.11426:474	331.10754:206 363.13443:1490	994.921
Hirsutine	5.86113	369.217	5968.66	62112.8	372.278	[M+H]+	Postive	NMLUOJBSAYAYEM-AZQGJTAVSA-N	Alkaloids and derivatives	Corynanthean-type alkaloids	310.424	726.037	500	369.0903:301 369.15256:1330 369.21692:13734 369.28882:264 370.12823:2826 370.22021:3931 371.10059:221 371.14426:819 371.22015:1827 372.19553:335 372.2251:401 373.12869:212 373.24246:278	109.10131:240 149.09645:205 191.14166:389 369.21222:251	994.91
Guanine	0.78715	152.058	6969.22	61821.7	370.533	[M+H]+	Postive	UYTPUPDQBNUYGX-UHFFFAOYSA-N	Organoheterocyclic compounds	Imidazopyrimidines	828	887.929	428.571	152.05762:17085 152.1042:876 152.4704:265 153.06056:1987 154.05013:1062 154.09154:1253 154.58878:210 154.97487:225 155.00346:259 155.08736:540 155.11763:517 155.97479:477 156.03285:461 156.06284:762 156.07669:475 156.10201:3539 157.01071:357 157.04938:1153	70.06438:304 110.03465:954 135.02989:2081 136.0327:208 152.05548:512	993.107
Chalcone base + 2O, 1MeO, 1Prenyl or Licochalcone A (not validated); PlaSMA ID-1858	10.4933	339.159	6022.94	61344.2	367.671	[M+H]+	Postive	KAZSKMJFUPEHHW-UHFFFAOYSA-N	Phenylpropanoids and polyketides	Linear 1,3-diarylpropanoids	-1	-1	-1	339.15909:11181 339.34464:2758 340.1333:408 340.16257:2738 340.35159:375 341.16974:220 342.2662:220 343.09656:506 343.19095:230		787.667
FAHFA 38:4	14.9407	585.486	5648.15	60856.6	364.749	[M-H]-	Negative	SQQQJLIIGODIPJ-XWVIRPHINA-N			-1	-1	-1	585.48608:8865 585.87781:1965 586.32385:2657 586.48969:2275 586.8949:980 587.1615:360 587.32874:2066 587.4259:212 587.46149:425 587.49133:565 587.88031:976 588.32697:514 588.89575:369 589.3136:225 589.44482:522 589.85486:308 590.38068:269		970.845
Ergothioneine	1.16093	230.096	2847.96	60697.9	363.797	[M+H]+	Postive	SSISHJJTAXXQAX-ZETCQYMHSA-N	Organic acids and derivatives	Carboxylic acids and derivatives	-1	-1	-1	230.09563:2376 230.13089:1626 230.14905:2101 230.98909:945 231.09695:327 231.15321:326 232.14644:385 232.93626:310 233.10474:292 233.97581:439 234.03046:249 234.10561:587 234.99301:277	113.04817:385	971.397
Sakuranetin; PlaSMA ID-1407	6.93783	287.091	16648.5	60664.4	363.596	[M+H]+	Postive	DJOJDHGQRNZXQQ-UHFFFAOYNA-N	Phenylpropanoids and polyketides	Flavonoids	-1	-1	-1	287.09091:16975 287.18216:219 288.09436:3209 289.09821:575 289.13876:227 291.19583:234	121.02835:242	991.051
Flavone base + 3O, 2MeO; PlaSMA ID-729	9.9875	329.066	6308.56	60624.4	363.357	[M-H]-	Negative	ZSPZNFOLWQEVQJ-UHFFFAOYSA-N	Phenylpropanoids and polyketides	Flavonoids	-1	-1	-1	329.06641:14560 329.1713:260 330.07019:2998 331.19025:245 333.20197:323	123.04535:215 271.02509:485	991.481
Butyryl carnitine (isomer of 919); PlaSMA ID-920	2.0888	232.154	2947	60548.7	362.903	[M+H]+	Postive	QWYFHHGCZUCMBN-UHFFFAOYNA-N	Lipids and lipid-like molecules	Fatty Acyls	-1	-1	-1	232.15352:3763 233.15678:464 233.98122:226 234.98581:221 235.99048:452 236.06416:222	96.91504:255 99.04484:270	959.45
D-(-)-Erythrose	1.00517	121.045	3730.63	60449.5	362.309	[M+H]+	Postive	FMAORJIQYMIRHF-HERZVMAMSA-N	Organic oxygen compounds	Organooxygen compounds	-1	-1	-1	120.9586:260 121.0453:3527 121.05837:2840 122.04929:408 122.95917:1980 123.04628:298 123.07518:1172 124.07105:356 124.09203:671 124.95864:332 124.98495:222 125.95995:723 125.98025:342	81.93598:475 94.03722:347 121.04877:243	841.217
1H-Indene-3-carboxylic acid, 3a,4,5,6,7,7a-hexahydro-3a,7,7-trimethyl-	5.73653	209.154	3521.33	60294.7	361.38	[M+H]+	Postive	ACQRUPZAAPLQQP-UHFFFAOYSA-N	Organic acids and derivatives	Carboxylic acids and derivatives	-1	-1	-1	209.11638:467 209.15413:6449 210.11491:211 210.1588:633 211.13731:214 211.16127:233 212.14017:389 213.10446:304 213.14879:250		853.895
FAD	5.57358	437.091	6764.71	60031.3	359.802	[M-H]-	Negative	VWWQXMAJTJZDQX-XIBAMUJRSA-N	Nucleosides, nucleotides, and analogues	Flavin nucleotides	-1	-1	-1	437.09073:19618 438.09418:5792 438.19803:296 439.09387:1800 439.17078:1530 439.67426:726 440.09171:506 440.17651:452		979.766
Licoricesaponin G2; PlaSMA ID-3378	8.37383	839.407	6387.86	59507.1	356.66	[M+H]+	Postive	WBQVRPYEEYUEBQ-UHFFFAOYNA-N	Lipids and lipid-like molecules	Prenol lipids	-1	-1	-1	839.40668:15097 840.29224:938 840.40973:6321 841.30304:335 841.41394:1549 842.29889:343 842.41089:241 843.41321:210		980.429
D(-)-Gulono-gamma-lactone	0.75515	177.04	5105.09	58791.4	352.371	[M-H]-	Negative	SXZYCXMUPBBULW-UHFFFAOYSA-N	Organoheterocyclic compounds	Lactones	-1	-1	-1	177.0396:7720 177.95334:207 178.04851:217 178.99609:223 179.05536:73427 180.05887:4599 181.01636:315 181.07069:19655 181.1201:389		971.755
C17-Sphinganine	9.68348	288.29	5856.71	58587.2	351.146	[M+H]+	Postive	KFQUQCFJDMSIJF-UHFFFAOYNA-N	Organic nitrogen compounds	Organonitrogen compounds	-1	-1	-1	288.25214:1535 288.28967:12545 289.13928:276 289.17935:300 289.29242:2021 290.07361:351 290.26785:782 291.0625:5405 291.16309:705 291.19424:1458 292.06635:704 292.19601:307 293.17651:386 293.21005:590		795.818
2,2`,4,4`-Tetrahydroxybenzophenone	6.95493	245.049	6399.23	58535.5	350.837	[M-H]-	Negative	WXNRYSGJLQFHBR-UHFFFAOYSA-N	Benzenoids	Benzene and substituted derivatives	-1	-1	-1	245.04871:16937 245.13556:291 246.05083:1853 247.04884:859 247.09515:222 248.04665:316 248.97307:116865 249.97627:2643		983.687
Reserpic acid; PlaSMA ID-2195	5.26227	401.206	6379.13	58523.4	350.765	[M+H]+	Postive	JVHNBFFHWQQPLL-UHFFFAOYNA-N	Alkaloids and derivatives	Corynanthean-type alkaloids	-1	-1	-1	401.17429:419 401.20621:14226 401.28149:314 401.63885:223 402.20978:3208 403.21576:730 404.82443:265 405.15268:543 406.14331:277		765.205
8-hydroxy-8-(3-octyloxiran-2-yl)octanoic acid	13.3479	297.243	3366.56	58406.1	350.061	[M+H]+	Postive	GQEOLYBERRZZCE-UHFFFAOYNA-N	Lipids and lipid-like molecules	Fatty Acyls	-1	-1	-1	297.2431:3560 298.24628:564 299.18585:509 301.14102:1394 301.17322:390 302.14249:232		989.061
rel-Dimethylenedioxy-dimethoxy-epoxylignan	4.95082	401.16	6442.97	58004.5	347.654	[M+H]+	Postive	ISBKEYQPAWAMRF-UHFFFAOYNA-N	Lignans, neolignans and related compounds	Furanoid lignans	-1	-1	-1	401.15988:16384 402.16391:3765 403.16699:724 404.155:711 405.1113:315 405.15594:283		773.452
Lariciresinol	4.69755	359.15	6013.63	57761.7	346.199	[M-H]-	Negative	MHXCIKYXNYCMHY-UHFFFAOYNA-N	Lignans, neolignans and related compounds	Furanoid lignans	-1	-1	-1	359.14984:16804 360.15195:3966 361.15573:1073 362.07193:289		891.391
Piperyline	3.61492	272.128	6039.75	57553.7	344.952	[M+H]+	Postive	GQIJYUMTOUBHSH-UHFFFAOYSA-N	Organoheterocyclic compounds	Benzodioxoles	-1	-1	-1	272.08871:207 272.12784:11187 272.18637:399 273.1308:1124 274.1337:333 274.27362:551 275.10876:248 275.14871:461 276.14853:306		984.703
(5E)-5-[2-(beta-D-Glucopyranosyloxy)ethylidene]-4-{[(2E)-3-(4-hydroxyphenyl)-2-propenoyl]oxy}-2-methyl-1-cyclopentene-1-carboxylic acid	6.47307	510.197	10235	57455.8	344.366	[M+NH4]+	Postive	CBJNLOVRAFQEQH-UHFFFAOYNA-N	Phenylpropanoids and polyketides	Cinnamic acids and derivatives	-1	-1	-1	510.19684:14418 511.11929:217 511.19931:3503 512.20435:659 513.20337:283 515.11505:945 515.15137:6471		986.687
1,8,10-trihydroxy-3-methoxy-6-methyl-10-(3-methylbut-2-enyl)anthracen-9-one	13.7613	399.144	6138.93	57336.7	343.652	[M-H]-	Negative	HKCWOSWEMAUQEH-UHFFFAOYNA-N	Benzenoids	Anthracenes	-1	-1	-1	399.14438:14099 399.23645:273 400.052:205 400.14737:2499 401.15292:412	355.07462:272 369.0957:940	980.509
Kaempferol-3-O-arabinoside; PlaSMA ID-1067	2.8106	417.086	3493.93	57266.9	343.233	[M-H]-	Negative	RNVUDWOQYYWXBJ-UHFFFAOYNA-N	Phenylpropanoids and polyketides	Flavonoids	-1	-1	-1	417.08575:3258 418.08765:762		964.256
C26H36O11	5.73653	525.231	3419.22	57175.1	342.683	[M+H]+	Postive	CBGLETFGTARBGG-UHFFFAOYSA-N	Lipids and lipid-like molecules	Fatty Acyls	-1	-1	-1	525.18646:2352 525.2309:6352 526.15277:243 526.18951:765 526.23206:1482 527.19879:689 527.23926:848 528.14899:1164 528.24908:247 528.63654:327 528.65637:362 529.15698:446 529.19989:234 529.25317:206 530.14471:380 530.20282:370		837.488
11-(2-bromo-3,6-dimethoxyphenyl)-3,3-dimethyl-2,3,4-trihydro-5H,10H,11H-benzo[ b]benzo[2,1-f]1,4-diazepin-1-one	0.75515	455.098	6589.83	57065	342.023	[M-H2O-H]-	Negative	AHTIKTYAZWVOGR-UHFFFAOYSA-N	Organoheterocyclic compounds	Benzodiazepines	-1	-1	-1	455.09839:20757 456.10251:2959 456.16846:16843 457.05225:686 457.10815:1307 457.17084:3442 458.17517:1011 459.13275:2283		983.684
(6aR,12aR)-12a-hydroxy-2,3,9-trimethoxy-6,6a-dihydrochromeno[3,4-b]chromen-12-one	6.16312	400.139	8325.98	57057.3	341.977	[M+NH4]2+	Postive	APAWOEBSLLGWDF-IEBWSBKVSA-N	Phenylpropanoids and polyketides	Isoflavonoids	-1	-1	-1	400.13867:13359 400.20926:537 400.63916:4116 401.14203:1255 401.19366:1886 401.64041:408 402.13379:270 402.19794:472		881.453
Adefovir Dipivoxil (Preveon, Hepsera)	5.73653	524.184	6248.28	56630.7	339.42	[M+H]+	Postive	WOZSCQDILHKSGG-UHFFFAOYSA-N	Organoheterocyclic compounds	Imidazopyrimidines	-1	-1	-1	524.11517:237 524.18365:12618 525.18646:2352 525.2309:6352 526.15277:243 526.18951:765 526.23206:1482 527.19879:689 527.23926:848 528.14899:1164 528.24908:247 528.63654:327 528.65637:362 529.15698:446		982.851
Yohimbic Acid	5.61193	341.186	6403.76	56551.6	338.946	[M+NH4]+	Postive	AADVZSXPNRLYLV-UHFFFAOYNA-N	Alkaloids and derivatives	Corynanthean-type alkaloids	-1	-1	-1	341.13931:949 341.18631:15663 342.13785:335 342.18869:3549 342.24203:320 343.11978:281 343.19232:743 344.108:265 344.20218:281 345.13065:985 345.16745:494 345.19916:225 345.62857:216 346.10025:388 346.13443:252		963.759
1,7,7-Trimethyl-1,2,3,3a,5a,6,7,8-octahydrocyclopenta[c]pentalene-4-carboxylic acid	12.578	235.168	5314.64	56434.1	338.242	[M+H]+	Postive	DCFDRCCHOOORSB-UHFFFAOYSA-N	Lipids and lipid-like molecules	Prenol lipids	-1	-1	-1	235.13466:210 235.16841:10831 236.17224:1794 237.18083:436 239.14401:212		904.32
alpha-Chaconine	12.3911	852.51	5918.52	56200.5	336.842	[M+H]+	Postive	TYNQWWGVEGFKRU-OHIAVPKISA-N	Lipids and lipid-like molecules	Steroids and steroid derivatives	-1	-1	-1	852.4458:506 852.51031:11713 853.37714:324 853.43866:1242 853.513:5562 853.94733:313 854.43866:1016 854.52008:1414 854.97076:348 855.30981:248 855.45184:114582 856.45514:58013 856.95978:797 857.05078:255 857.46649:109825		972.719
Rosuvastatin	10.4621	482.172	3569.85	56000.3	335.642	[M+H]+	Postive	BPRHUIZQVSMCRT-YXWZHEERSA-N	Organoheterocyclic compounds	Diazines	-1	-1	-1	482.17236:6433 483.17838:4262 483.27155:782 484.17889:1166 484.2785:334 485.18884:325 485.3331:317 486.3298:334	287.1976:232	965.349
beta-D-Glucopyranoside, 2-phenylethyl 2-O-beta-D-xylopyranosyl-	4.1132	439.157	6193.22	55924	335.185	[M+H]+	Postive	CGZNTHDUAFIKOH-BMVMOQKNSA-N	Organic oxygen compounds	Organooxygen compounds	-1	-1	-1	439.05847:697 439.15686:13744 439.242:217 440.06644:260 440.16064:2913 440.20963:447 441.09894:210 441.16724:953 442.19278:259 443.19327:201		993.152
Phillyrin	4.9671	579.208	5992.09	55811.4	334.51	[M-H]-	Negative	KFFCKOBAHMGTMW-UHFFFAOYNA-N	Lignans, neolignans and related compounds	Lignan glycosides	-1	-1	-1	578.94342:213 579.12476:350 579.20789:17577 580.21252:4771 581.16608:342 581.21594:1735 582.18701:1576 582.23645:1193 583.18542:979 583.2395:513 584.19171:272	61.98759:577 181.05156:464 417.1546:3464 418.16196:476	793.549
Isobavachin	10.0549	323.129	5658.18	55615.1	333.333	[M-H]-	Negative	KYFBXCHUXFKMGQ-IBGZPJMESA-N	Phenylpropanoids and polyketides	Flavonoids	-1	-1	-1	323.02313:283 323.12885:12326 324.13293:2385 324.22739:262 325.14304:2789 325.23541:539 326.14554:598 326.2276:222 327.00864:215 327.16019:845 328.12518:261	91.01936:371 135.00899:817 187.11223:932	839.62
Inosine	0.68775	267.073	5558.98	55392.2	331.997	[M-H]-	Negative	UGQMRVRMYYASKQ-KQYNXXCUSA-N	Nucleosides, nucleotides, and analogues	Purine nucleosides	-1	-1	-1	266.98215:328 267.01761:303 267.0726:9307 268.0751:1785 268.97833:311 269.07263:220 270.09119:309 270.92642:210 271.02344:226 271.04419:230 271.08841:357		973.72
(2R,3R)-3,5-dihydroxy-2-(4-hydroxyphenyl)-8-(3-methylbut-2-enyl)-7-[(2S,3R,4S,5S,6R)-3,4,5-trihydroxy-6-(hydroxymethyl)oxan-2-yl]oxy-2,3-dihydrochromen-4-one	0.75515	563.178	5853.88	55370.8	331.869	[M-H]-	Negative	GRDZTDZJQRPNCN-UHFFFAOYNA-N	Phenylpropanoids and polyketides	Flavonoids	-1	-1	-1	563.17749:12308 564.18011:2806 565.18665:710 566.15149:910 567.15393:294		878.747
(5xi,9xi)-Beyer-15-en-18-yl methyl succinate	12.9829	425.269	6088.68	54964.2	329.432	[M+H]+	Postive	CNEWEMXPRRKCTL-UHFFFAOYNA-N	Lipids and lipid-like molecules	Prenol lipids	-1	-1	-1	425.19196:427 425.26849:14007 426.27261:4585 427.15009:224 427.2468:647 427.27975:781 428.26239:363 429.16751:3053 430.16821:541		967.144
N-Fructosyl pyroglutamate; PlaSMA ID-534	0.68775	290.088	6267.97	54634.1	327.454	[M-H]-	Negative	VMOJEEZNLOLYBG-UHFFFAOYNA-N	Organic acids and derivatives	Carboxylic acids and derivatives	-1	-1	-1	290.02924:296 290.08771:19696 291.03055:367 291.05832:804 291.09088:2485 292.06717:364 292.09543:620 293.0192:338 293.09857:2992 294.02023:242 294.08856:1147 295.06891:1964		978.062
Flavanone base + 2O, 2Prenyl; PlaSMA ID-981	13.5592	391.191	5487.66	54429.9	326.23	[M-H]-	Negative	CUFAXDWQDQQKFF-UHFFFAOYNA-N	Phenylpropanoids and polyketides	Flavonoids	-1	-1	-1	391.19098:11298 391.28787:9324 392.19418:4018 392.29205:2740 393.19858:625 393.29654:1020 394.19077:213 394.29971:295	59.0135:1796 61.9875:517 201.09108:341	881.062
Strictosidine; PlaSMA ID-2782	5.95457	531.233	6469.5	54082.7	324.149	[M+H]+	Postive	XBAMJZTXGWPTRM-UHFFFAOYNA-N	Lipids and lipid-like molecules	Prenol lipids	-1	-1	-1	531.16827:244 531.23334:15344 532.23663:4848 533.15546:226 533.23657:1101 533.3103:1007 534.21259:2580 534.31012:517 535.21552:744 536.10437:421 536.19543:269		984.457
3,16,17-trihydroxy-17-acetyl-androstane	11.9862	351.253	3518.59	53821.1	322.581	[M+H]+	Postive	AKYKYHKJUHUACD-UHFFFAOYNA-N	Lipids and lipid-like molecules	Steroids and steroid derivatives	-1	-1	-1	351.25296:4652 352.15393:1561 352.25284:1401 353.13892:1795 353.26828:1164 354.13931:592 355.1875:1082 356.18777:218		987.299
(3S,4S)-5-[(3S,4S)-4,10-dihydroxy-7,9-dimethoxy-3-methyl-3,4-dihydro-1H-benzo[g]isochromen-5-yl]-7,9-dimethoxy-3-methyl-3,4-dihydro-1H-benzo[g]isochromene-4,10-diol	4.95082	561.207	6101.46	53815.5	322.547	[M+H]+	Postive	AVAQRWVGWWNBIN-CUAUGLLKSA-N	Lignans, neolignans and related compounds	Arylnaphthalene lignans	-1	-1	-1	561.15686:230 561.20752:14364 562.21088:4314 563.1402:217 563.21173:1180 565.15662:1515 565.24542:215 566.16272:601		854.163
Naphtho[1,2-b]furan-2(3H)-one, decahydro-6-hydroxy-5a-methyl-3,9-bis(methylene)-, (3aS,5aR,6R,9aS,9bS)-	11.8928	231.138	5679.05	53230.2	319.039	[M+H]+	Postive	FKBUODICGDOIGB-UHFFFAOYNA-N	Lipids and lipid-like molecules	Prenol lipids	-1	-1	-1	231.13789:12721 232.14056:2867 233.14493:326 235.16699:451		962.585
Paeonol; PlaSMA ID-364	2.80513	167.07	3882.57	53108.8	318.311	[M+H]+	Postive	UILPJVPSNHJFIK-UHFFFAOYSA-N	Organic oxygen compounds	Organooxygen compounds	-1	-1	-1	167.01456:233 167.06998:3889 168.07249:666 170.07867:288 170.15311:210 171.01021:210	84.95896:292	974.321
3',5'-Dimethoxy-4'-hydroxyacetophenone	4.49183	197.08	5650.96	53013.9	317.743	[M+H]+	Postive	OJOBTAOGJIWAGB-UHFFFAOYSA-N	Organic oxygen compounds	Organooxygen compounds	-1	-1	-1	197.08038:8133 197.12459:367 198.08429:967 199.06081:271 199.97357:279 199.9995:834 201.01868:267 201.04416:1433 202.04503:290	56.94149:230 77.03772:226	934.723
Flavanone base + 3O, 1Prenyl; PlaSMA ID-1872	11.6125	341.138	5013.41	52876.5	316.919	[M+H]+	Postive	CGKWSLSAYABZTL-UHFFFAOYNA-N	Phenylpropanoids and polyketides	Flavonoids	-1	-1	-1	341.13806:8008 342.14105:2090 344.23865:319 345.17087:754 345.2041:301		989.309
3-[5,7-dihydroxy-2-(4-hydroxyphenyl)-4-oxo-2,3-dihydrochromen-3-yl]-5,7-dihydroxy-2-(4-hydroxyphenyl)-2,3-dihydrochromen-4-one	0.693717	543.133	7044.68	52799.2	316.456	[M+H]+	Postive	RNQBLQALVMHBKH-UHFFFAOYNA-N	Phenylpropanoids and polyketides	Flavonoids	-1	-1	-1	543.13269:14212 544.13409:2329 545.13367:1067 546.13855:497 547.14563:313	122.92371:220 543.13214:1083	964.224
NCGC00384627-01	15.0418	411.161	4917.62	52771.9	316.292	[M-H]-	Negative	JPRAADAALYQLIE-UHFFFAOYSA-N	Organoheterocyclic compounds	Dioxanes	-1	-1	-1	411.16132:7233 411.24115:395 411.2666:403 412.16107:2289 413.15817:3108 413.27911:258 413.3645:287 414.15973:1774 415.15762:694 415.27731:231 415.30615:3535		747.93
Quercetin 3,7-dimethyl ether	9.1213	331.082	6154.64	52719.1	315.976	[M+H]+	Postive	LUJAXSNNYBCFEE-UHFFFAOYSA-N	Phenylpropanoids and polyketides	Flavonoids	-1	-1	-1	331.08234:15075 331.18863:949 331.24014:297 332.08463:2457 332.18906:222 333.08664:289 333.20404:430 335.19501:225 335.22134:389	298.04745:550 316.05682:231 331.07977:257	873.984
Benzoylcholine	2.74285	208.132	4269.05	52572	315.094	[M+H]+	Postive	HOPVGFKDVOOCHD-UHFFFAOYSA-N	Benzenoids	Benzene and substituted derivatives	-1	-1	-1	208.10062:1098 208.13254:5590 209.09769:446 209.13618:919 210.10997:576 210.14618:342 210.1844:297 212.09059:510 212.12968:298		836.985
(1aS,1bS,2S,5aR,6S,6aS)-6-({6-Deoxy-2-O-[(2E)-3-(4-hydroxyphenyl)-2-propenoyl]-alpha-L-mannopyranosyl}oxy)-1a-(hydroxymethyl)-1a,1b,2,5a,6,6a-hexahydrooxireno[4,5]cyclopenta[1,2-c]pyran-2-yl beta-D-glucopyranoside	5.54963	672.25	5288.16	52328.6	313.635	[M+NH4]+	Postive	XIPQZLUSSJDAIC-UHFFFAOYNA-N	Phenylpropanoids and polyketides	Cinnamic acids and derivatives	-1	-1	-1	672.24951:10659 673.2533:3427 674.25659:647 675.24725:221 676.16547:644 677.20544:5779		985.593
2-Propenoic acid, 3-(4-hydroxyphenyl)-, [(1S,4aR,5S,7aS)-1-(beta-D-glucopyranosyloxy)-1,4a,5,7a-tetrahydro-5-hydroxycyclopenta[c]pyran-7-yl]methyl ester, (2E)-	6.37865	475.159	14048.2	52295.9	313.439	[M+H]+	Postive	DQTBTFHCLVMGBP-WXUDOLSOSA-N	Lipids and lipid-like molecules	Prenol lipids	-1	-1	-1	475.15897:15296 476.16266:4208 477.16385:570 478.16379:309 479.18277:207	85.02727:251 107.0491:2419 219.06476:254 267.10019:401 295.09653:376 313.1062:906	785.282
THIO-TEPA52-24-4	1.00517	190.058	4777.26	52156.3	312.603	[M+H]+	Postive	FOCVUCIESVLUNU-UHFFFAOYSA-N	Organic acids and derivatives	Organic thiophosphoric acids and derivatives	-1	-1	-1	189.95834:792 189.97842:772 190.05777:7246 191.00876:2303 191.06122:830 193.91628:237 194.06726:951 194.95688:480 194.98329:416		994.782
2-(1H-indol-3-yl)-2-oxo-N-[(1R)-1-phenylethyl]acetamide	5.86113	293.128	4620.93	52099.9	312.265	[M+H]+	Postive	JCQKMELKMGOGMR-GFCCVEGCSA-N	Organoheterocyclic compounds	Indoles and derivatives	-1	-1	-1	293.09851:253 293.12787:9358 293.17245:1773 293.28339:248 294.13019:1627 294.17578:336 294.20477:1160 294.23749:286 295.14594:218 295.20905:489 296.16241:248 296.25427:289 297.09296:221 297.12827:354 297.16638:275 297.19644:687		985.419
Mycophenolic acid	5.73653	321.132	5478.31	52063.3	312.045	[M+H]+	Postive	HPNSFSBZBAHARI-RUDMXATFSA-N	Organoheterocyclic compounds	Isocoumarans	-1	-1	-1	321.04129:393 321.06165:466 321.09674:387 321.13232:11464 321.20151:263 321.57809:273 322.10614:2805 322.13507:2622 323.0499:1042 323.10843:712 323.13525:611 323.19479:212 324.069:253 324.1225:4992 324.18378:221 325.09406:1150 325.12643:1422 325.19214:259 326.09753:364 326.13058:381	97.0638:204 133.02614:271 189.0925:587 213.09:406 307.07544:230 309.09564:309	995.094
4-Hydroxy-3-(4-methoxy-6-methyl-5,6,7,8-tetrahydro-[1,3]dioxolo[4,5-g]isoquinolin-5-yl)-chromen-2-one	6.01687	382.128	6782.41	51806	310.503	[M+H]+	Postive	VJLLAJFALOGHNM-UHFFFAOYNA-N	Phenylpropanoids and polyketides	Coumarins and derivatives	-1	-1	-1	382.12793:14771 383.13254:2662 383.20337:331 384.1416:705 384.18185:663 385.14816:320 385.2124:22190 385.30911:210 386.12637:249 386.21475:5186 387.10681:401		977.589
3-[(Ethoxycarbonyl)amino]phenyl phenylcarbamate	6.64022	323.101	4522.52	51765.7	310.262	[M+H]+	Postive	WZJZMXBKUWKXTQ-UHFFFAOYSA-N	Benzenoids	Benzene and substituted derivatives	-1	-1	-1	322.95651:224 323.04095:356 323.10117:5054 323.1767:1166 324.09122:982 324.11154:554 324.17914:334 325.11862:599 325.19058:6071 326.19507:856 327.09357:214 327.20709:424		984.381
Pedein B	13.1299	891.392	5675.29	51588.7	309.201	[M+H]+	Postive	NPRMKCREBUKCFL-UHFFFAOYNA-N	Organic acids and derivatives	Carboxylic acids and derivatives	-1	-1	-1	891.39203:3229 891.4436:1991 892.39716:1841 892.45007:827 892.54163:237 893.39709:726 893.46204:2213 894.40613:278 894.46735:1233 895.40662:274		919.392
(Z)-3-Hydroxyhexadec-7-enoic acid (NMR)	10.5266	269.212	1543.7	51543	308.927	[M-H]-	Negative	CBHANIXDPMXBGZ-KTKRTIGZNA-N	Lipids and lipid-like molecules	Fatty Acyls	-1	-1	-1	269.04599:3363 269.0838:1333 269.21237:2002 270.04913:579 270.21506:243 271.05365:364 271.09146:438 271.11676:469	59.0138:370 225.22127:931	982.016
3-(2,4-dihydroxypentyl)-8-hydroxy-6-methoxyisochromen-1-one	0.724867	295.113	7002.71	51253.3	307.19	[M+H]+	Postive	CXVPYCSNJZJTRF-UHFFFAOYSA-N	Phenylpropanoids and polyketides	Isocoumarins and derivatives	-1	-1	-1	295.01102:1110 295.11334:18146 296.06906:908 296.10562:3740 297.08054:1087 297.10858:1085 297.58643:426 298.07108:411 298.11359:322 298.56509:239 299.06107:236 299.08807:242		947.743
Carnosine	14.0646	451.212	5586.9	51157.4	306.616	[M-H]-	Negative	CQOVPNPJLQNMDC-ZETCQYMHSA-N	Organic acids and derivatives	Peptidomimetics	-1	-1	-1	451.21198:15782 452.21548:4964 452.92804:947 453.21732:1477 453.29858:1213 453.33273:525 454.31213:303 454.345:244 454.9252:1097 455.35172:1815 455.92398:254	451.21185:1128	920.643
4-Chlorophenol; LC-ESI-QFT; ; 15; R=35000; [M-H]-	17.2993	127.001	2845.64	51060.9	306.037	[M-H]-	Negative	WXNZTHHGJRFXKQ-UHFFFAOYSA-N	Benzenoids	Phenols	-1	-1	-1	126.90524:330 127.00059:3786 127.02499:730 127.89616:734 130.9444:695 130.99115:296		983.836
3-hydroxy-8-methoxy-3-methyl-2,4-dihydrobenzo[a]anthracene-1,7,12-trione	11.9862	337.106	5533.11	50929.5	305.25	[M+H]+	Postive	XZLGWJORNHETKI-UHFFFAOYSA-N	Phenylpropanoids and polyketides	Angucyclines	-1	-1	-1	337.10626:12116 337.1749:337 338.11237:2436 338.34128:15088 339.11697:637 339.18234:340 339.34454:4151 340.15738:210 340.34848:833 341.85715:258		987.244
1,6-Anhydro-beta-D-glucose	0.756	163.06	5793.51	50383.7	301.978	[M+H]+	Postive	TWNIBLMWSKIRAT-VFUOTHLCSA-N	Organoheterocyclic compounds	Oxepanes	-1	-1	-1	163.04164:449 163.0601:11069 163.11813:522 164.0631:1070 164.08838:230 165.07571:2783 166.05377:373 167.09071:735	55.01827:487 61.02859:311 69.03392:914 73.02834:240 81.03468:233 85.02862:368	972.385
HARMAN	5.0131	183.091	5868.22	49949.1	299.374	[M+H]+	Postive	PSFDQSOCUJVVGF-UHFFFAOYSA-N	Alkaloids and derivatives	Harmala alkaloids	619.995	750	1000	182.96121:843 182.98332:433 183.03065:217 183.09152:15862 183.14072:253 183.96111:226 184.02402:611 184.095:1692 184.9864:218 185.06477:345 185.10863:1386 186.05205:212 186.10962:218 186.95335:247 187.09587:1102	84.95985:388 142.06332:323 183.09177:1680	832.583
2-OXOADIPATE	0.75515	159.029	4040.2	49913.6	299.161	[M-H2O-H]-	Negative	FGSBNBBHOZHUBO-UHFFFAOYSA-N	Organic acids and derivatives	Keto acids and derivatives	-1	-1	-1	158.99014:757 159.02899:4965 159.07455:306 159.10176:258 159.9644:254 160.06102:1914 160.09404:246 161.04501:28157 162.04822:2277 162.90205:302 163.02397:244 163.06033:3934		991.936
4-hydroxy-benzoate	10.8338	139.039	5490.79	49567.8	297.088	[M+H]+	Postive	FJKROLUGYXJWQN-UHFFFAOYSA-N	Benzenoids	Benzene and substituted derivatives	-1	-1	-1	139.03931:12217 139.08452:260 139.98662:205 140.04189:859 140.11778:243 140.95238:843 141.05865:369 141.11374:829 141.95892:2307 142.12512:209 142.97728:356 143.00159:6061 143.04265:473 143.06883:233 143.08984:577 143.10422:325 143.96025:214 144.00168:606	56.94223:211 65.03846:767	935.987
Tributylamine	9.4141	186.221	5680.29	49497.3	296.666	[M+H]+	Postive	IMFACGCPASFAPR-UHFFFAOYSA-N	Organic nitrogen compounds	Organonitrogen compounds	-1	-1	-1	186.22133:7350 187.12628:1262 187.22534:979 188.13033:259 188.64595:256 189.16295:417 189.99323:894		932.891
16-Hydroxyhexadecanoic acid	10.7288	271.227	4493.24	49472.6	296.518	[M-H]-	Negative	UGAGPNKCDRTDHP-UHFFFAOYSA-N	Lipids and lipid-like molecules	Fatty Acyls	-1	-1	-1	271.22699:8415 272.23209:1044	225.22125:496	973.516
21-Acetoxypregnenolone566-78-9	13.6282	375.25	4182.94	49430.6	296.266	[M+Na]+	Postive	MDJRZSNPHZEMJH-UHFFFAOYSA-N	Lipids and lipid-like molecules	Steroids and steroid derivatives	-1	-1	-1	375.25043:7609 376.25391:1287 377.25757:368		888.027
5,7-dihydroxy-3-[4-hydroxy-2-methoxy-5-(2-methylbut-3-en-2-yl)phenyl]-6-(3-methylbut-2-enyl)-2,3-dihydrochromen-4-one	12.1776	437.196	4945.66	49069.5	294.102	[M-H]-	Negative	UTHDGFYWNZCMEW-UHFFFAOYNA-N	Phenylpropanoids and polyketides	Isoflavonoids	-1	-1	-1	437.10776:238 437.19601:10060 437.26852:229 438.20148:3200 439.20367:557		975.885
Sempervirine; PlaSMA ID-1248	12.4845	273.134	2996.76	49045.1	293.956	[M+H]+	Postive	UQVUEULZDJRMJR-UHFFFAOYSA-N	Organoheterocyclic compounds	Indoles and derivatives	-1	-1	-1	273.13382:2485 274.27408:1567 275.17853:399 275.20038:525 277.21042:909	69.03358:389	975.572
Cyclopenta[c]pyran-4-carboxylic acid, 1-(beta-D-glucopyranosyloxy)-1,4a,5,6,7,7a-hexahydro-5,6-dihydroxy-7-methyl-, 2-(4-hydroxyphenyl)ethyl ester	7.62877	557.187	5002.21	48966.9	293.487	[M-H]-	Negative	JUGKCFLQZJYLHO-UHFFFAOYNA-N	Lipids and lipid-like molecules	Prenol lipids	-1	-1	-1	557.18732:12037 558.18994:3715 559.19073:1379 560.19519:276 561.68176:228		757.575
Nicotinic acid	0.880583	124.039	4312.48	48906.5	293.125	[M+H]+	Postive	PVNIIMVLHYAWGP-UHFFFAOYSA-N	Organoheterocyclic compounds	Pyridines and derivatives	-1	-1	-1	124.03911:6820 124.07613:576 124.09713:2324 124.96356:481 125.02242:326 125.04256:689 125.96339:740 125.98557:564 126.04392:1657 126.05459:1678 126.10136:256 126.97094:823 127.02346:1212 127.03769:1389 127.08487:278 127.95044:259 128.04001:327 128.07054:385 128.95209:1246 128.98209:409 128.99934:446 129.01888:375		950.892
[(2R,3S,4S,5S)-3,4-dihydroxy-5-(3,4,5-trihydroxybenzoyl)oxyoxan-2-yl]methyl 3,4,5-trihydroxybenzoate	1.69863	467.082	3746.65	48798.7	292.479	[M-H]-	Negative	IGKWMHUOBKCUQU-LTCOOKNTSA-N	Benzenoids	Benzene and substituted derivatives	-1	-1	-1	467.08185:4277 468.08511:963 469.09067:414	112.98532:383	997.719
Acetylcholine	0.78715	146.117	5772.11	48721.2	292.014	[M+H]+	Postive	OIPILFWXSMYKGL-UHFFFAOYSA-N	Organic nitrogen compounds	Organonitrogen compounds	-1	-1	-1	145.96507:376 146.04616:2704 146.09213:12715 146.11661:14346 146.15355:3175 146.97231:604 147.02856:588 147.06676:1263 147.09224:991 147.11996:1239 147.98125:256 148.02051:247 148.05936:785 148.07169:633 148.10628:3077 148.94492:247 148.99194:632 149.08064:851 149.10886:490 149.94781:279 150.01791:249 150.05516:515 150.091:4837 151.0909:625 151.10751:442		933.163
N-pyridin-3-yl-2-[(4,8,8-trimethyl-2-oxo-9,10-dihydropyrano[2,3-h]chromen-5-yl)oxy]acetamide	9.21473	395.16	6280.65	48715.2	291.978	[M+H]+	Postive	LVQGEYGJUNSKKW-UHFFFAOYSA-N	Phenylpropanoids and polyketides	Coumarins and derivatives	-1	-1	-1	395.11111:650 395.15985:14356 395.24017:370 396.11246:355 396.1626:3082 397.16483:486 397.18735:284 399.1882:333 399.24536:233 399.27246:236		876.493
L-Tyrosine	0.911733	182.08	2874.05	48610.8	291.352	[M+H]+	Postive	OUYCCCASQSFEME-QMMMGPOBSA-N	Organic acids and derivatives	Carboxylic acids and derivatives	-1	-1	-1	182.0798:2710 182.11249:363 182.95927:424 182.98659:808 183.08492:428 183.96503:398 184.02866:634 184.06332:373 184.10677:417 184.98933:274 185.02264:403 185.06607:701 186.07414:279 186.98756:367 187.05873:317	56.94173:626 70.0655:224 72.93624:243 84.9586:319	939.89
4-Pyridoxic acid	0.756	184.064	5858.74	48247.9	289.177	[M+H]+	Postive	HXACOUQIXZGNBF-UHFFFAOYSA-N	Organoheterocyclic compounds	Pyridines and derivatives	-1	-1	-1	184.06413:17511 184.13776:267 185.04338:227 185.06975:1079 186.07254:1779 186.11035:505 186.96968:538 187.07272:553 187.10925:531 188.09227:580 188.12921:1496		973.485
MLS001141091-01	5.47372	435.202	4787.26	48161.5	288.659	[M+H]+	Postive	RZLQVWRMJJDCKY-CYFREDJKSA-N	Organic acids and derivatives	Carboxylic acids and derivatives	-1	-1	-1	435.16467:839 435.20193:10815 436.16043:5539 436.20264:3185 436.95483:464 437.16882:1519 437.20905:853 438.11008:283 438.17996:248 438.23599:297 439.09955:400		968.021
1,3-Benzodioxole, 4-methoxy-6-[(2S,3R,4R,5S)-tetrahydro-3,4-dimethyl-5-(3,4,5-trimethoxyphenyl)-2-furanyl]-	5.47372	417.191	5248.06	47988.1	287.62	[M+H]+	Postive	RKSBJQZDPAGEQW-NDTBOIMWSA-N	Lignans, neolignans and related compounds	Furanoid lignans	-1	-1	-1	417.11902:11411 417.19122:12213 418.12112:2495 418.19397:2921 419.13446:1910 419.20032:710 420.13315:265 420.17285:283 420.25577:225 421.18961:275		963.091
Isoflavone base + 1O, 1MeO, O-Hex+C7H12NO; PlaSMA ID-2857	6.36297	556.217	7529.81	47854.9	286.822	[M+H]+	Postive	PNOLBYVRLYUCIC-UHFFFAOYNA-N			-1	-1	-1	556.21704:9739 556.6911:226 557.2207:3865 558.22253:842 559.11621:329 559.22894:229 560.224:359		947.569
5,3'-Dihydroxyflavone	6.68542	253.05	5226.75	47705.3	285.925	[M-H]-	Negative	SZMQXDYEGKRZDG-UHFFFAOYSA-N	Phenylpropanoids and polyketides	Flavonoids	783.604	877.237	1000	253.0499:14269 253.14185:250 254.0538:1892 255.06541:1420 255.23235:864 256.23083:243	117.03411:762 135.00909:529 253.05022:1943	772.97
SPA-9C (TENTATIVE)	0.75515	313.112	5192.63	47632.6	285.489	[M-H]-	Negative	OKAXESGQNYIPGL-UHFFFAOYNA-N	Benzenoids	Benzene and substituted derivatives	-1	-1	-1	313.11212:12912 314.11588:1345 314.97668:539 315.07111:932 315.12155:782 316.08127:380 316.1102:400 317.10208:215	59.01387:649 71.01311:655 89.0227:378 101.02519:363 133.05046:1860 207.02814:229	934.738
1,4-BENZOQUINONE	0.756	109.029	5207.66	47615.7	285.388	[M+H]+	Postive	AZQWKYJCGOJGHM-UHFFFAOYSA-N	Organic oxygen compounds	Organooxygen compounds	-1	-1	-1	108.96033:244 109.02878:9320 109.07288:401 110.03207:950 110.05916:784 110.06945:620 111.04417:1818 112.05065:3688 113.06001:2139	53.03838:533 55.01781:272 55.05413:435 81.03403:315	981.106
Betaxolol	7.25257	308.222	5685.19	47585.8	285.209	[M+H]+	Postive	NWIUTZDMDHAVTP-UHFFFAOYNA-N	Benzenoids	Phenols	-1	-1	-1	308.05182:223 308.22217:14691 309.03363:284 309.1062:305 309.18036:337 309.22385:2472 310.22928:503 311.20288:1059 312.08765:278 312.20642:242 313.0813:229 313.14011:341	93.06976:267 290.20956:471 308.22122:1724	926.118
(2S,3S)-2-[(1E,3R,4S)-3,4-Dihydroxy-1-penten-1-yl]-6-oxo-3,6-dihydro-2H-pyran-3-yl (2E)-2-methyl-2-butenoate	6.51565	319.113	6443.17	47566.5	285.093	[M+NH4]2+	Postive	JTHHOHSDOJJNFN-ZXSHYABSSA-N	Organoheterocyclic compounds	Pyrans	-1	-1	-1	319.11273:13874 319.61331:5587 320.11456:1050 320.61487:461 321.10611:461 322.10776:697 323.1055:839 323.17706:7409		755.791
2-amino-3-[4-hydroxy-3-(3-methylbut-2-enyl)phenyl]propanoic acid	3.77063	250.143	4186.23	47480.7	284.579	[M+H]+	Postive	UFFPHPAGEHMRFF-UHFFFAOYSA-N	Organic acids and derivatives	Carboxylic acids and derivatives	-1	-1	-1	250.14294:4239 251.14476:745 251.16144:548 252.13963:233 253.00362:419 254.10045:249		973.504
2-Propenoic acid, 3-(3-hydroxy-4-methoxyphenyl)-, (1aS,1bS,2S,5aR,6S,6aS)-2-(beta-D-glucopyranosyloxy)-1a,1b,2,5a,6,6a-hexahydro-1a-(hydroxymethyl)oxireno[4,5]cyclopenta[1,2-c]pyran-6-yl ester, (2E)-	3.75408	537.157	5031.81	47432.9	284.293	[M-H]-	Negative	LRHHPZILMPIMIY-GGKKSNITSA-N	Phenylpropanoids and polyketides	Cinnamic acids and derivatives	-1	-1	-1	537.1571:10682 537.2431:211 538.16071:2620 539.16376:654		869.285
Tabersonine; PlaSMA ID-1848	6.5468	337.191	4741.61	47415.4	284.188	[M+H]+	Postive	FNGGIPWAZSFKCN-UHFFFAOYNA-N	Alkaloids and derivatives	Plumeran-type alkaloids	-1	-1	-1	337.12698:2442 337.1907:10223 338.0553:275 338.1387:194083 339.10498:733 339.14288:38817 339.34283:730 340.14569:6532 341.10361:370 341.14606:1356 341.18121:447	307.18024:31710 308.18301:4490 322.10388:661 323.11417:599 324.11905:202 337.12543:345 337.63147:249	956.632
Indoline	2.15108	120.081	3730.98	47019.4	281.815	[M+H]+	Postive	LPAGFVYQRIESJQ-UHFFFAOYSA-N	Organoheterocyclic compounds	Indoles and derivatives	-1	-1	-1	120.08082:4312 121.02431:344 121.05087:3077 121.0839:333 122.09666:336 122.96479:1615 123.09166:426 123.96548:214 124.0421:698 124.07226:267 124.96346:226		864.617
Flavonol base + 4O, 1MeO, O-Hex, O-Hex, O-Hex; PlaSMA ID-2068	13.4244	817.201	3641.93	46706.9	279.941	[M-H]-	Negative	POYUZVAGWZVXKD-UHFFFAOYNA-N	Phenylpropanoids and polyketides	Flavonoids	-1	-1	-1	817.20099:4833 818.20392:1677 819.19995:456 820.17566:654 821.17969:236 822.18494:202	59.0131:769 61.98752:236	948.41
2-Aminophenol	0.8183	110.06	4889.04	46469.9	278.521	[M+H]+	Postive	CDAWCLOXVUBKRW-UHFFFAOYSA-N	Benzenoids	Benzene and substituted derivatives	-1	-1	-1	109.96627:348 110.0111:480 110.0324:511 110.05978:10625 110.97708:403 111.00568:224 111.04418:5397 111.09086:568 111.94498:271 111.98338:345 112.04848:1846 112.08634:11193 112.96786:498 112.99125:270 113.03382:2699 113.05867:1258 113.08923:515 113.93876:415 113.96299:1731 113.98382:570 114.03799:499 114.05793:1022 114.08926:322 114.94816:366 114.98389:1240 115.00449:612 115.03858:1057	65.03857:339 67.04149:216 70.06467:2699 71.06926:239 96.00583:259 110.061:720	877.611
1,8-Azulenediol, 1,2,3,3a,4,7,8,8a-octahydro-3a,6-dimethyl-1-(1-methylethyl)-, (1R,3aR,8S,8aS)-	0.724867	221.186	6792.01	46430.1	278.282	[M+H]+	Postive	SUAPQGLGNKUSLY-LJISPDSOSA-N	Lipids and lipid-like molecules	Prenol lipids	-1	-1	-1	221.04359:384 221.08101:438 221.18613:23497 222.01964:387 222.04611:304 222.09744:1229 222.13327:243 222.1899:2219 223.06328:610 223.08667:800 223.16289:316 224.06084:255 224.11806:441 225.08614:334		971.519
2(5H)-Furanone, 3-[2-[(1R,4aS,5R,6R,8aS)-decahydro-6-hydroxy-5-(hydroxymethyl)-5,8a-dimethyl-2-methylene-1-naphthalenyl]acetyl]-	5.70837	393.191	3200.25	46292.5	277.457	[M-H]-	Negative	KPJIGLLMDBHXEB-UHFFFAOYNA-N	Lipids and lipid-like molecules	Prenol lipids	-1	-1	-1	393.12372:235 393.19113:4433 394.19357:975 396.63034:218	393.18976:324	814.075
(1E,4S,6R,7E,11aS,14S,14aS,15S,15aR,16aS,16bS)-14-Benzyl-6-hydroxy-4,6,15,15a-tetramethyl-3,13,14,14a,15,15a,16a,16b-octahydro[1,3]dioxacyclotridecino[4,5-d]oxireno[f]isoindole-5,10,12(4H,6H)-trione	11.6125	513.262	4639.58	46283.4	277.403	[M+H]+	Postive	LAJXCUNOQSHRJO-ZYGJITOWSA-N	Alkaloids and derivatives	Cytochalasans	-1	-1	-1	513.18988:462 513.26239:8622 513.34729:279 514.26764:2802 514.35211:204 515.2699:372 517.26526:207 517.32697:202		848.883
1-desoxymethylsphinganine	15.9177	284.295	5644.27	46039	275.938	[M+H]+	Postive	UGVBFHUWZNNKIK-QGZVFWFLSA-N	Organic nitrogen compounds	Organonitrogen compounds	-1	-1	-1	284.29453:9790 285.29785:1502 286.27536:207 289.1514:215		973.727
NP-000062(6)	5.10653	565.155	4830.83	46010.6	275.768	[M+H]+	Postive	DRLZZQRQMWQRLZ-FBMRRHFKSA-N	Phenylpropanoids and polyketides	Flavonoids	-1	-1	-1	565.15533:12597 566.15948:3983 567.16357:799		980.502
4-Methoxy-5-methyl-6-[(3-methyl-2-buten-1-yl)oxy]-1-isoindolinone	12.9206	262.143	5391	45506.8	272.748	[M+H]+	Postive	DSOITGJEUKHAJN-UHFFFAOYSA-N	Organoheterocyclic compounds	Isoindoles and derivatives	-1	-1	-1	262.14328:15196 263.14618:1846 264.15128:548 264.23312:588 265.15024:250 265.21817:438 266.17151:271	262.14392:1470	988.212
Flavanone base + 3O, 1Prenyl; PlaSMA ID-1875	10.0261	341.139	4567.41	45474.9	272.557	[M+H]+	Postive	LPEPZZAVFJPLNZ-UHFFFAOYNA-N	Phenylpropanoids and polyketides	Flavonoids	-1	-1	-1	341.13849:9297 341.20987:271 342.1409:2344 343.11612:266 343.14288:271 344.18646:1245 345.1091:953 345.1983:437		865.534
Topotecan	6.78648	420.156	4659.15	45468.1	272.516	[M-H]-	Negative	UCFGDBYHRUNTLO-QHCPKHFHSA-N	Alkaloids and derivatives	Camptothecins	-1	-1	-1	420.09698:308 420.1561:10955 420.22873:212 421.15817:3669 422.16089:797 422.6586:217 423.08517:310 423.20755:236	127.04127:730 167.06178:422 349.15576:835 350.15604:297	973.116
Pseudobaptigenin	8.70707	281.045	1742.26	45458.1	272.457	[M-H]-	Negative	KNJNBKINYHZUGC-UHFFFAOYSA-N	Phenylpropanoids and polyketides	Isoflavonoids	-1	-1	-1	281.04492:3045 281.11026:282 282.04886:682 283.05673:250 283.26358:407 285.03726:463 285.07117:371 285.17941:296 286.04251:309		811.406
Rhoeadine; PlaSMA ID-2121	6.09377	384.144	6659.81	45400.6	272.112	[M+H]+	Postive	XRBIHOLQAKITPP-UHFFFAOYNA-N	Alkaloids and derivatives	Rhoeadine alkaloids	-1	-1	-1	384.14444:13443 385.14859:3158 385.21231:17427 386.15494:775 386.21603:4509 387.15375:526 387.216:964	384.14169:653	986.385
Icariin	8.33637	735.248	3835.53	45113.2	270.389	[M-H]-	Negative	TZJALUIVHRYQQB-KXAQCXCVSA-N	Phenylpropanoids and polyketides	Flavonoids	-1	-1	-1	735.24835:9637 736.25293:3393 737.25415:1032 738.27728:272	735.24921:242	972.791
Pygenic acid B b	10.2907	487.342	2459.11	45099.7	270.308	[M-H]-	Negative	JXSVIVRDWWRQRT-VULHWTOISA-N	Lipids and lipid-like molecules	Prenol lipids	880	623.558	500	486.92169:247 487.34198:3637 488.34494:1992 489.21265:201 489.33609:248 491.14963:225	487.34576:420	994.115
[5-acetyloxy-1,7-bis(3,4-dihydroxyphenyl)heptan-3-yl] acetate	4.85737	433.185	4281.3	45046.2	269.988	[M+H]+	Postive	BWSFBLYFHGZBRQ-UHFFFAOYNA-N	Phenylpropanoids and polyketides	Diarylheptanoids	-1	-1	-1	433.11261:875 433.18536:10334 434.18774:3011 435.12469:216 435.19656:576 436.20358:257 437.08807:221		983.857
N-Methyl-2-pyrrolidone	2.11993	100.075	2820.54	44700.2	267.914	[M+H]+	Postive	SECXISVLQFMRJM-UHFFFAOYSA-N	Organoheterocyclic compounds	Pyrrolidines	-1	-1	-1	99.96729:337 100.05201:524 100.07544:3539 100.93195:355 101.01756:805 101.05833:301 101.07809:853 101.94872:1326 102.01124:282 102.94675:835 103.0531:268 104.04736:249 104.06882:220 104.10587:523	60.98534:318 72.93671:814	968.573
Flavonol base + 3O, O-Hex-Pen; PlaSMA ID-1057	5.0008	415.104	4320.11	44665.7	267.707	[M-H]-	Negative	RXAXTTGJEMODPY-UHFFFAOYNA-N	Phenylpropanoids and polyketides	Flavonoids	-1	-1	-1	415.10394:10678 416.10693:2895 417.11487:986 417.15524:1806 418.11658:369 418.15991:379 419.07663:289		966.629
(5R)-2-amino-5-(1H-indol-3-ylmethyl)-1,3-oxazol-4-one	1.16093	230.092	2662.46	44565.1	267.104	[M+H]+	Postive	FGTZCVGIFPOOSE-SNVBAGLBSA-N	Organoheterocyclic compounds	Indoles and derivatives	-1	-1	-1	230.09209:4574 230.14359:2150 230.58128:220 230.9787:448 231.09433:687 231.99706:233 232.01819:286 232.10959:231 232.14482:305 233.01559:222 233.06305:324 233.10088:293 233.97121:348 233.99985:392 234.0864:386	113.04817:385	983.943
2',6'-Dihydroxy-4-methoxychalcone-4'-O-neohesperid	6.01165	593.188	4292.92	44532.4	266.908	[M-H]-	Negative	HWRDCYOHJBCWGW-UHFFFAOYNA-N	Phenylpropanoids and polyketides	Flavonoids	-1	-1	-1	593.18805:9512 593.25903:13641 594.05011:230 594.13898:268 594.19061:3079 594.26324:4193 595.19171:508 595.26343:1352 596.16235:2824 596.26886:221 597.18347:1635 597.255:2176	173.0455:2931 274.15256:232	968.464
(+)-Cinchonine	10.5556	295.181	5013.74	44297.3	265.499	[M]+	Postive	KMPWYEUPVWOPIM-UHFFFAOYSA-O	Alkaloids and derivatives	Cinchona alkaloids	891.137	860.088	500	295.18112:10222 295.22354:1977 296.18384:2210 296.23364:424 297.20291:386 297.23816:436 298.24393:225 299.25784:426	137.09494:228 277.17053:893 295.17932:1029	994.533
Flavone base + 3O, 1MeO, 1Prenyl; PlaSMA ID-2059	10.4621	369.133	3931.23	44247.3	265.2	[M+H]+	Postive	NZYSZZDSYIBYLC-UHFFFAOYSA-N	Phenylpropanoids and polyketides	Isoflavonoids	-1	-1	-1	369.13333:8569 370.1369:1678 371.09787:440 371.13995:429 373.16104:270		927.13
Tyrphostin AG 528	5.50487	307.107	5481.47	44244.7	265.184	[M+H]+	Postive	MYKCTDWWIWGLHW-NTEUORMPSA-N	Phenylpropanoids and polyketides	Cinnamic acids and derivatives	-1	-1	-1	307.10715:11845 307.1763:226 307.5892:685 308.11038:2369 309.08878:354 309.1088:424 309.15747:537 311.16608:241 311.18268:226		907.904
Corticosterone	5.89228	347.222	5064.78	44184.4	264.822	[M+H]+	Postive	OMFXVFTZEKFJBZ-HJTSIMOOSA-N	Lipids and lipid-like molecules	Steroids and steroid derivatives	-1	-1	-1	347.13943:3898 347.22183:13479 348.14395:961 348.22452:2495 349.15424:1935 349.22134:301 350.12311:235 350.15958:472 350.21747:474 351.14169:395 351.17081:1553 351.21582:267 352.13416:421 352.17441:264		935.735
Anthocyanidin base + 4O, 2MeO, O-Hex; PlaSMA ID-2638	6.57793	493.131	3659.39	44163.4	264.697	[M+H]+	Postive	PXUQTDZNOHRWLI-UHFFFAOYNA-O	Phenylpropanoids and polyketides	Flavonoids	-1	-1	-1	493.13135:7741 494.13657:2107 495.14328:348 496.21329:564 497.1683:218 497.27106:249		951.861
lysophosphatidylcholine	12.578	522.354	4533.16	44127.5	264.482	[M+H]+	Postive	YAMUFBLWGFFICM-UHFFFAOYNA-N	Lipids and lipid-like molecules	Glycerophospholipids	-1	-1	-1	522.35443:9801 523.35901:2565 524.36523:302 527.29376:221 527.32587:263		987.331
methyl 4,10-diacetyloxy-5-hydroxy-1,4a-dimethyl-9-oxo-7-propan-2-yl-3,4,10,10a-tetrahydro-2H-phenanthrene-1-carboxylate	12.1776	505.213	4765.33	44099.3	264.312	[M-H2O-H]-	Negative	FQBKTTHDWBBWHB-UHFFFAOYSA-N	Lipids and lipid-like molecules	Prenol lipids	-1	-1	-1	505.21268:12145 505.3743:351 506.21603:4682 507.21884:936 508.2189:219 508.83264:245 509.18622:345 510.11871:211	224.10741:485 268.09708:1821 269.10086:428	995.647
N-cyclopropyl-2-[(4,8,8-trimethyl-2-oxo-9,10-dihydropyrano[2,3-h]chromen-5-yl)oxy]acetamide	5.98572	358.167	5041.54	44033.1	263.916	[M+H]+	Postive	JZICABCSNXQWEX-UHFFFAOYSA-N	Phenylpropanoids and polyketides	Coumarins and derivatives	-1	-1	-1	358.16663:13579 359.16919:2715 360.17291:421 360.95364:216 361.1235:260 363.14664:520		777.407
17-(3-Furyl)-4,4,8-trimethyl-3,16-dioxoandrosta-1,14-dien-7-yl acetate	13.2233	451.247	3969.91	43996.2	263.694	[M+H]+	Postive	KWAMDQVQFVBEAU-UHFFFAOYNA-N	Lipids and lipid-like molecules	Prenol lipids	-1	-1	-1	451.24692:6929 452.25052:2205 453.16745:801 453.25601:890 454.16974:303 456.18668:385		836.475
2-Isopropylmalic acid	0.788833	175.061	4419.94	43979.2	263.593	[M-H]-	Negative	BITYXLXUCSKTJS-UHFFFAOYNA-N	Lipids and lipid-like molecules	Fatty Acyls	-1	-1	-1	174.99182:1378 175.0248:1646 175.06116:13012 175.99568:293 176.06477:781 177.04063:7370 178.02232:227 178.04506:608 179.00186:468 179.05579:10961 179.10539:217 180.04059:338		955.426
Nicosulfuron	7.56138	409.091	4701.78	43717.3	262.023	[M-H]-	Negative	RTCOGUMHFFWOJV-UHFFFAOYSA-N	Organoheterocyclic compounds	Pyridines and derivatives	-1	-1	-1	409.09055:8647 409.16388:280 410.09518:1638 411.10583:1027 412.14761:450 413.11789:389 413.15024:539 413.6572:221		964.868
PYRIDOXINE	0.8183	170.08	3814.89	43705.6	261.953	[M+H]+	Postive	LXNHXLLTXMVWPM-UHFFFAOYSA-N	Organoheterocyclic compounds	Pyridines and derivatives	-1	-1	-1	170.05428:400 170.08026:6954 171.06322:855 171.08228:789 171.11263:1241 172.0052:377 172.03435:370 172.1145:1704 172.12901:1548 172.16843:260 172.95509:230 172.97374:2300 173.0502:365 173.09584:786 174.03554:289 174.08372:2109 174.11508:2047 174.15776:3447 174.96997:235 175.01735:1418 175.0584:638		881.15
Caffeine	0.724867	195.086	5370.58	43588.7	261.252	[M+H]+	Postive	RYYVLZVUVIJVGH-UHFFFAOYSA-N	Organoheterocyclic compounds	Imidazopyrimidines	-1	-1	-1	195.08589:13170 195.15611:257 196.08948:1028 198.04968:219 198.09752:3843 198.96985:207 199.02348:346 199.06253:584 199.10233:626 199.52583:370 199.56467:248 200.0443:3366	55.01832:289 61.02767:355 69.03397:264 81.0337:1714 85.02982:210 97.02859:212 109.02861:658	967.712
[2,6-dihydroxy-5-[3,4,5-trihydroxy-6-(hydroxymethyl)oxan-2-yl]oxycyclohex-3-en-1-yl] (E)-3-(3,4-dihydroxyphenyl)prop-2-enoate	6.60907	488.175	2949.31	43342.4	259.776	[M+H]+	Postive	HRTKMOMTMZCGLF-QHHAFSJGSA-N	Phenylpropanoids and polyketides	Cinnamic acids and derivatives	-1	-1	-1	488.17456:3278 489.18295:616 490.18384:400 490.20862:341 491.21338:303 491.29944:301 492.17679:233 492.22266:209 493.1315:3790		969.168
Histamine	0.8183	112.086	4678.2	43302.6	259.538	[M+H]+	Postive	NTYJJOPFIAHURM-UHFFFAOYSA-N	Organic nitrogen compounds	Organonitrogen compounds	-1	-1	-1	111.94498:271 111.98338:345 112.04848:1846 112.08634:11193 112.96786:498 112.99125:270 113.03382:2699 113.05867:1258 113.08923:515 113.93876:415 113.96299:1731 113.98382:570 114.03799:499 114.05793:1022 114.08926:322 114.94816:366 114.98389:1240 115.00449:612 115.03858:1057 115.09336:207 116.01895:553 116.06974:5130 116.1072:1125 116.96177:348 116.97324:292 117.05647:1144	70.06451:2075 72.93696:1158	922.762
3-[6-({6-O-[(2R,3R,4R)-3,4-Dihydroxy-4-(hydroxymethyl)tetrahydro-2-furanyl]-beta-D-glucopyranosyl}oxy)-1-benzofuran-5-yl]propanoic acid	4.20662	501.158	5100.72	43204.5	258.949	[M+Na]+	Postive	NOCZJUUWDACQEY-XWOUNRCYSA-N	Organic oxygen compounds	Organooxygen compounds	-1	-1	-1	501.15808:13881 501.25278:228 502.16104:2153 503.16144:609 503.20157:292 504.22263:706 505.22565:416		914.971
Soyasapogenol B base + O-HexA-Hex-Pen; PlaSMA ID-2168	10.4929	927.495	4537.2	43188.1	258.851	[M-H]-	Negative	MADZMXIFUWFDJK-AEARDBQCSA-N	Lipids and lipid-like molecules	Prenol lipids	-1	-1	-1	927.49548:8960 928.49908:5116 929.50183:2285 930.4696:1133 931.47327:321 932.4809:229		887.092
2-hydroxy-4-methoxy-3-(3-methylbut-2-enyl)-6-pentylbenzoic acid	10.1195	307.19	4304.89	43134.9	258.532	[M+H]+	Postive	UJSSSFNGQWZNEN-UHFFFAOYSA-N	Benzenoids	Benzene and substituted derivatives	-1	-1	-1	307.18973:10565 307.25647:368 308.19308:1689 309.11029:331 309.19296:642 310.14365:575 310.19067:238 311.21017:1231	157.09096:223	974.383
3-(5,6-dihydroxyheptyl)-4-methyl-2H-furan-5-one	3.45918	246.169	2637.39	43067.4	258.128	[M+H]+	Postive	HNNQILZBIHECCU-UHFFFAOYNA-N	Lipids and lipid-like molecules	Fatty Acyls	-1	-1	-1	246.16887:2957 247.1768:1061 247.95961:399 250.16388:205		880.123
10phiC10SPC (STANDARD)	7.93203	327.123	3413.04	42749.7	256.224	[M-H]-	Negative	VCKAUONIDRWIGP-UHFFFAOYSA-N	Benzenoids	Benzene and substituted derivatives	-1	-1	-1	327.0506:2063 327.12271:5173 327.21741:2729 328.05322:427 328.12817:807 328.21396:204 329.13544:268 329.2312:683 331.01465:244 331.15698:624		977.102
4-hydroxy-3,6-dimethylpyran-2-one	3.64607	141.055	4610.31	42671.8	255.757	[M+H]+	Postive	VVBIGJOVPZMWGU-UHFFFAOYSA-N	Organoheterocyclic compounds	Pyrans	-1	-1	-1	140.9521:941 141.05487:8457 141.08977:1789 141.11115:447 141.95816:3729 142.05757:428 142.97005:537 143.00113:8044 143.10626:224 143.95874:232 143.98653:279 144.01323:361 144.08098:202 144.09891:228 144.95822:266 145.03471:354 145.96852:236		979.628
Coumaroyl quinic acid (isomer of 758, 759); PlaSMA ID-760	2.67582	337.091	2943.24	42640.4	255.568	[M-H]-	Negative	XWRHBGVVCOSNKO-UHFFFAOYNA-N	Organic oxygen compounds	Organooxygen compounds	731.63	772.888	500	337.09134:3956 338.09668:542 341.08429:232	93.03407:222 191.05531:533	999.491
Flavone base + 3O, 2MeO, O-guaiacylglycerol; PlaSMA ID-2767	0.724867	527.158	5178.64	42603.1	255.345	[M+H]+	Postive	WXNJNHFYIWEHIL-UHFFFAOYNA-N	Phenylpropanoids and polyketides	Flavonoids	-1	-1	-1	526.67566:210 527.15826:10152 528.16284:2222 529.14972:635 531.14929:258 532.1358:624		983.667
3',4,5',6-tetrahydroxy-2',8'-bis(4-hydroxyphenyl)-5-[3,4,5-trihydroxy-6-(hydroxymethyl)oxan-2-yl]spiro[1-benzofuran-2,9'-2,3,4,8-tetrahydrofuro[2,3-h]chromene]-3-one	0.693717	705.185	6571.02	42452.5	254.442	[M+H]+	Postive	MYIUHDZRMLFLNJ-UHFFFAOYNA-N	Phenylpropanoids and polyketides	2-arylbenzofuran flavonoids	-1	-1	-1	705.185:19279 706.18872:4984 707.18896:2564 708.18939:887		907.832
Phthalic acid	17.1646	165.019	3114.19	42282.8	253.425	[M-H]-	Negative	XNGIFLGASWRNHJ-UHFFFAOYSA-N	Benzenoids	Benzene and substituted derivatives	750	668.025	500	164.89894:976 165.019:5980 166.02293:765 166.05046:478 166.9977:250 167.01607:227 167.0377:227 167.83647:333 167.93066:237 167.95049:273 168.02888:230 168.98979:202 169.01146:811 169.83458:615 170.00603:413	121.02843:315	999.213
2-(3-hexyl-4-methyl-2,5-dioxopyrrol-1-yl)-3-hydroxybutanoic acid	12.2354	315.193	2513.59	42249.3	253.225	[M+H]+	Postive	PDIJXNGNSUILEE-UHFFFAOYSA-N	Organic acids and derivatives	Carboxylic acids and derivatives	-1	-1	-1	315.19272:2999 316.19751:477 318.24182:495 318.30075:233 319.2244:489		943.251
CBDZ-M	3.80178	206.094	3553.6	42232.4	253.123	[M+H]+	Postive	OKOVSTKGUBOSTB-UHFFFAOYSA-N	Organoheterocyclic compounds	Benzimidazoles	-1	-1	-1	206.0939:5812 206.98354:282 207.09665:1266 208.09006:1442 210.16739:324	74.99897:718 102.99117:313	935.052
(4-hydroxyphenyl)-[2,4,6-trihydroxy-3-[(2S,3R,4R,5S,6R)-3,4,5-trihydroxy-6-(hydroxymethyl)oxan-2-yl]phenyl]methanone	4.88852	409.11	5026.57	42104.1	252.354	[M+Na]+	Postive	BZYKNVLTMWYEFA-UHFFFAOYNA-N	Organic oxygen compounds	Organooxygen compounds	-1	-1	-1	409.11041:14757 409.18301:843 410.0368:276 410.11218:3077 410.22128:253 411.0864:612 411.11121:789 411.16379:718 411.19553:691 412.11935:263 413.13284:369 413.20605:265		972.7
4-[(3R,3aR,6S,6aR)-6-(4-hydroxy-3,5-dimethoxyphenyl)-1,3,3a,4,6,6a-hexahydrofuro[3,4-c]furan-3-yl]-2,6-dimethoxyphenol	5.89228	401.159	4163.88	42055.6	252.063	[M+H]+	Postive	KOWMJRJXZMEZLD-GKHNXXNSSA-N	Lignans, neolignans and related compounds	Furanoid lignans	-1	-1	-1	401.15884:8079 402.069:229 402.11661:333 402.16379:1875 403.16675:530 404.13669:230		812.458
beta-D-Glucopyranose, 1-O-[(3beta,5xi,9xi,18xi)-3-(beta-D-glucopyranuronosyloxy)-29-hydroxy-28-oxoolean-12-en-28-yl]-	10.9272	833.429	4384.93	42022.2	251.863	[M+H]+	Postive	IDUNGWJLADYQNW-UHFFFAOYNA-N	Lipids and lipid-like molecules	Prenol lipids	-1	-1	-1	833.42944:9053 834.42981:4097 835.43561:1133 836.44061:325		973.111
Dimefline	10.1818	324.158	4636.35	41789.3	250.467	[M+H]+	Postive	ZXFQRFXLFWWKLX-UHFFFAOYSA-N	Phenylpropanoids and polyketides	Flavonoids	-1	-1	-1	324.15747:10030 325.16086:2361 326.22745:448 327.19229:1680 328.19577:385 328.24551:399	233.09517:634 250.12099:329	992.094
Dicaffeoylquinic acid IV	12.5146	515.121	2125.04	41712.3	250.006	[M-H]-	Negative	IYXQRCXQQWUFQV-RDJMKVHDSA-N			-1	-1	-1	515.12152:2110 515.33246:331 516.12256:612 517.12177:501	68.99608:793	853.064
Quercetin 3-(6''-acetylglucoside); PlaSMA ID-1403	5.67467	505.098	4588.89	41681	249.818	[M-H]-	Negative	IGLUNMMNDNWZOA-UHFFFAOYNA-N	Phenylpropanoids and polyketides	Flavonoids	-1	-1	-1	505.03625:212 505.09805:12253 505.22321:245 505.25793:206 506.10114:3044 507.10782:477 507.22397:235 508.1116:245 509.23822:756 509.2757:246	257.04483:4429 258.04797:925	974.926
4,4`-Thiodiphenol	0.72145	217.029	4534.04	41674.8	249.781	[M-H]-	Negative	VWGKEVWFBOUAND-UHFFFAOYSA-N	Organosulfur compounds	Thioethers	-1	-1	-1	217.00171:27381 217.02916:9911 217.10431:492 218.00589:2078 218.03169:886 218.06364:334 219.00716:296 219.04663:407 219.97768:371 220.08003:834 220.11441:290 220.99281:391 221.06595:3417		979.744
Tubotaiwine	6.67135	325.19	4157.97	41361.8	247.905	[M+H]+	Postive	RLAKWLFUMAABBE-UHFFFAOYNA-N	Alkaloids and derivatives	Strychnos alkaloids	735.551	60.0378	500	325.08945:333 325.11121:459 325.19043:8975 326.1947:2797 327.20029:508	293.16324:1505 294.16678:528	996.356
6-Nonenamide, N-[(4-hydroxy-3-methoxyphenyl)methyl]-8-methyl-, (6E)-	10.8961	306.206	4050.74	41255.4	247.267	[M+H]+	Postive	YKPUWZUDDOIDPM-SOFGYWHQSA-N	Benzenoids	Phenols	-1	-1	-1	306.20599:6994 307.1666:210 307.21005:1159 308.2186:215 309.18689:1241 309.23666:228 311.20062:1531	60.08135:1927	988.484
HYDROQUINONE	0.78715	111.044	3810.25	41152.1	246.648	[M+H]+	Postive	QIGBRXMKCJKVMJ-UHFFFAOYSA-N	Benzenoids	Phenols	-1	-1	-1	110.97708:403 111.00568:224 111.04418:5397 111.09086:568 111.94498:271 111.98338:345 112.04848:1846 112.08634:11193 112.96786:498 112.99125:270 113.03382:2699 113.05867:1258 113.08923:515 113.93876:415 113.96299:1731 113.98382:570 114.03799:499 114.05793:1022 114.08926:322 114.94816:366 114.98389:1240 115.00449:612 115.03858:1057 115.09336:207 116.01895:553	70.06421:263 70.95582:416 72.93662:500	955.878
Gibberellin A44	6.61805	345.17	2826.5	41075.3	246.188	[M-H]-	Negative	KSBJAONOPKRVRR-YTJHIPEWSA-N	Lipids and lipid-like molecules	Prenol lipids	-1	-1	-1	345.17017:4730 346.17429:845 346.87335:339 347.09586:2609 347.16934:261 347.59723:1798 348.09647:463 348.59348:239 348.86859:301	119.05069:346 163.03816:707 248.97427:213 255.06606:318	826.512
vanillic acid	0.923617	167.035	2681.47	41043.9	246	[M-H]-	Negative	WKOLLVMJNQIZCI-UHFFFAOYSA-N	Benzenoids	Benzene and substituted derivatives	-1	-1	-1	166.89114:222 167.03503:2716 168.06813:212 168.88721:5236 169.01489:292 170.88246:1099 170.97951:228	61.98731:441	982.009
Estrone-3-(beta-D-glucuronide)	10.0212	445.186	4422.01	40904.7	245.165	[M-H]-	Negative	FJAZVHYPASAQKM-UHFFFAOYNA-N	Lipids and lipid-like molecules	Steroids and steroid derivatives	-1	-1	-1	445.186:10715 445.28448:247 446.19012:2930 446.27618:210 447.19232:709 448.19495:239	59.01368:2557	988.841
120156	11.4567	509.29	4313.21	40899.2	245.133	[M+H]+	Postive	UHTOUBUBRNIMLK-UIOOFZCWSA-N	Organic acids and derivatives	Carboxylic acids and derivatives	-1	-1	-1	509.15118:241 509.28967:9423 510.29501:2982 511.17352:221 511.29355:839 512.18146:272 513.18799:478 513.26129:320 513.34644:311		974.28
Ethyl-beta-glucuronide	0.75515	221.066	3239.37	40817.4	244.642	[M-H]-	Negative	IWJBVMJWSPZNJH-UQGZVRACSA-N	Organic oxygen compounds	Organooxygen compounds	-1	-1	-1	220.99281:391 221.06595:3417 222.06805:495 222.13316:34489 223.04507:383 223.08066:11169 223.13635:4019 224.084:1337 224.14018:518 225.06152:2388	59.01382:15929	731.888
beta-D-Glucopyranoside, (1aS,1bS,2S,5aR,6S,6aS)-6-[[3-O-acetyl-6-deoxy-2-O-[(2E)-3-(4-hydroxyphenyl)-1-oxo-2-propen-1-yl]-alpha-L-mannopyranosyl]oxy]-1a,1b,2,5a,6,6a-hexahydro-1a-(hydroxymethyl)oxireno[4,5]cyclopenta[1,2-c]pyran-2-yl, 2-acetate	6.79592	761.226	3966.64	40780.6	244.422	[M+H]+	Postive	MIQMVCTWXSPFSC-TUVVYHBMSA-N	Phenylpropanoids and polyketides	Cinnamic acids and derivatives	-1	-1	-1	761.22552:8100 762.22925:3180 763.23633:1012 764.22687:330		893.176
beta-D-Glucopyranoside, 3-ethyl-4-hydroxy-4-methylpentyl 6-O-[(2S,3R,4R)-tetrahydro-3,4-dihydroxy-4-(hydroxymethyl)-2-furanyl]-	4.76393	463.215	3360.51	40755.4	244.271	[M+H]+	Postive	ZHOUHFMRWBOCFO-UHFFFAOYNA-N	Lipids and lipid-like molecules	Fatty Acyls	-1	-1	-1	463.14673:200 463.21466:8269 464.11673:286 464.17184:407 464.21762:1153 465.18274:268 465.22299:320		990.658
Ginkgolide A	5.86113	431.132	4508.27	40540.2	242.98	[M+H]+	Postive	FPUXKXIZEIDQKW-UHFFFAOYNA-N	Lipids and lipid-like molecules	Prenol lipids	-1	-1	-1	430.91064:226 431.13232:9300 431.22787:302 432.10358:219 432.13663:2025 433.13638:388 433.18304:719 435.18414:1643	281.07718:326 282.0864:351 311.0889:966	970.264
N-Fructosyl phenylalanine; PlaSMA ID-1767	2.18223	328.139	1625.79	40495	242.71	[M+H]+	Postive	FAVRCIXPIVJIPN-UHFFFAOYNA-N	Organic acids and derivatives	Carboxylic acids and derivatives	-1	-1	-1	328.1394:1696 328.88565:217 329.13986:550 330.14618:241		976.725
Gibberellin A19	6.517	361.165	2041.07	40426.8	242.301	[M-H]-	Negative	VNCQCPQAMDQEBY-YTJHIPEWSA-N	Lipids and lipid-like molecules	Prenol lipids	-1	-1	-1	361.16519:4063 362.16849:589 363.08014:203 363.16858:251 364.06497:224 364.19626:249 365.00424:342	61.98783:655 299.05496:286	978.062
(2S)-1-[(2S)-3-methyl-2-[(3-oxo-2,4-dihydroquinoxaline-1-carbonyl)amino]pentanoyl]pyrrolidine-2-carboxylic acid	9.4966	403.202	4500.96	40318.2	241.65	[M+H]+	Postive	YPHAYFLTWWLPTN-GQHGFMKCSA-N	Organic acids and derivatives	Carboxylic acids and derivatives	-1	-1	-1	403.2016:9931 404.20493:2787 405.20984:527 406.09021:468 407.23932:541		988.89
7-O-??-(6???-trans-p-coumaroyl)-glucopyranosyl-8,3???,4???-trihydroxyflavanone	5.53163	597.204	4681.45	40307.3	241.585	[M+Na]+	Postive	PHQCFARQBSPGHM-XUDVLBGNSA-N	Phenylpropanoids and polyketides	Flavonoids	-1	-1	-1	597.2038:8848 598.2085:2707 599.20697:604 600.21027:274		945.549
3-Methylcatechol	2.878	123.045	3426.99	40221.6	241.071	[M-H]-	Negative	PGSWEKYNAOWQDF-UHFFFAOYSA-N	Benzenoids	Phenols	-1	-1	-1	122.89394:1485 123.04536:5977 123.08579:248 123.90196:6271 124.04581:844 124.89093:228 125.02474:258 125.89897:3292 127.89626:396	77.04006:254 105.03496:225	945.385
Dehydroisoandrosterone sulfate	12.3461	367.155	3307.71	40017.6	239.849	[M-H]-	Negative	CZWCKYRVOZZJNM-UHFFFAOYNA-N	Lipids and lipid-like molecules	Steroids and steroid derivatives	-1	-1	-1	367.11993:504 367.15463:7482 367.36038:221 368.1571:1510 369.16013:369 369.18839:214 371.18808:302	187.03891:654	980.386
3,8-dihydroxy-3-methyl-2,4-dihydrobenzo[a]anthracene-1,7,12-trione	6.60907	323.091	3523.77	39915.3	239.235	[M+H]+	Postive	UGEKKXLEYACFTD-UHFFFAOYNA-N	Phenylpropanoids and polyketides	Angucyclines	-1	-1	-1	323.0914:6002 323.17743:492 323.21078:218 324.09473:1316 324.21219:305 325.09451:242 325.18411:418 325.64896:233 326.14322:296 327.08804:383 327.16586:270 327.21814:415		973.566
Uridine (Not validated); PlaSMA ID-371	0.957317	243.062	1962.47	39760.9	238.31	[M-H]-	Negative	DRTQHJPVMGBUCF-UHFFFAOYNA-N	Nucleosides, nucleotides, and analogues	Pyrimidine nucleosides	-1	-1	-1	243.0619:5028 243.11888:229 243.89876:417 244.06487:681 245.06648:501 245.98259:286 246.93764:266 247.11147:304	61.98723:269	709.62
Cyanidin-3-O-rhamnoside	5.70538	433.112	4559.29	39685.3	237.857	[M+H]+	Postive	USWXMMRFOWNEOR-VWLKIGRWSA-O	Phenylpropanoids and polyketides	Flavonoids	-1	-1	-1	433.11191:10332 433.18222:614 434.11502:2575 434.19305:438 435.12042:640 435.20111:7789 436.1615:384 436.20319:2111 436.95126:347 437.21542:2817		975.72
2-Cyclohexen-1-one, 4,6-dihydroxy-3-[(1E)-3-hydroxy-3-methyl-1-buten-1-yl]-6-methyl-, (4R,6S)-	7.62632	209.116	3798.02	39563.2	237.125	[M+H]+	Postive	MQTHRHQDRZPYGH-DMKSKQPMSA-N	Organic oxygen compounds	Organooxygen compounds	-1	-1	-1	209.08203:482 209.11644:7018 210.12001:1066 211.09428:318 211.13023:799 212.0585:329 212.16121:488 213.00735:280 213.10083:285 213.15009:268		899.591
[(2S,3R,4S,5S,6R)-4,5-dihydroxy-6-[[(E)-3-(4-hydroxyphenyl)prop-2-enoyl]oxymethyl]-2-(3,4,5-trihydroxybenzoyl)oxyoxan-3-yl] 3,4,5-trihydroxybenzoate	4.79863	629.112	2444.83	39471.3	236.574	[M-H]-	Negative	QDSDUIWGMCGLHI-UHFFFAOYNA-N	Phenylpropanoids and polyketides	Tannins	-1	-1	-1	629.11182:3062 629.24048:1467 630.11694:962 630.24591:235 631.26172:2817 631.96985:221 632.26654:607 633.1781:315 633.2724:1006	353.0882:520	954.803
isorhamnetin	8.30267	315.05	2551.77	39353.8	235.87	[M-H]-	Negative	IZQSVPBOUDKVDZ-UHFFFAOYSA-N	Phenylpropanoids and polyketides	Flavonoids	-1	-1	-1	315.05048:3621 316.05527:1276 317.0643:722 318.07001:407		798.082
Diphenylsulfoxide	0.724867	203.053	3770.46	39004.4	233.776	[M+H]+	Postive	JJHHIJFTHRNPIK-UHFFFAOYSA-N	Benzenoids	Benzene and substituted derivatives	-1	-1	-1	203.05287:4657 203.11215:1005 204.05367:587 204.08652:7777 205.05043:277 205.08351:3665 205.11662:487 206.04402:477 206.0639:1854 206.0992:592 206.13847:3124 207.05145:844 207.07056:467 207.14249:630 207.17058:3379		733.775
2(3H)-Furanone, 5-[4-[1-(acetyloxy)-4-oxo-5-[(2Z)-2-penten-1-yl]-2-cyclopenten-1-yl]butyl]dihydro-	7.8755	371.182	4341.2	38869.2	232.965	[M+H]+	Postive	ARNKLTDIWFIVMO-UHFFFAOYNA-N	Lipids and lipid-like molecules	Fatty Acyls	-1	-1	-1	371.14612:296 371.18164:9479 372.18539:1661 373.12491:215 373.19543:489 373.2377:312 375.17993:380 376.07898:1204 376.18036:206		931.59
N-[3-(3-methoxyphenyl)-4-oxochromen-2-yl]furan-2-carboxamide	0.756	362.098	4746.61	38842.7	232.807	[M+H]2+	Postive	GFVZTAWQXORWCC-UHFFFAOYSA-N	Phenylpropanoids and polyketides	Isoflavonoids	-1	-1	-1	362.09836:9094 362.15555:3095 362.59918:2415 363.10095:565 363.16031:241 363.60049:395 364.09454:763 365.1062:51278 366.01981:350 366.10938:6143 367.08041:1466		748.112
4-Hydroxyquinoline	6.2138	144.046	4159.53	38807.4	232.595	[M-H]-	Negative	PMZDQRJGMBOQBF-UHFFFAOYSA-N	Organoheterocyclic compounds	Quinolines and derivatives	796.576	823.765	500	144.04547:9579 144.96358:339 145.04857:1241 146.00974:370 146.02376:343 146.0511:240 146.96426:803 147.02742:275	64.00587:333 144.04456:1412	995.641
Triphenylphosphine oxid	9.27097	279.093	3673.38	38682.2	231.845	[M+H]+	Postive	FIQMHBFVRAXMOP-UHFFFAOYSA-N	Benzenoids	Benzene and substituted derivatives	-1	-1	-1	279.09344:5887 279.22778:237 280.09766:1345 280.1492:213 282.27899:511 283.13348:238		988.432
Phosphatidylcholine lyso 18:2	11.8744	578.346	3900.74	38454	230.477	[M-H]-	Negative	HQNGWMLDFPEZSR-NFYLBXPESA-N	Lipids and lipid-like molecules	Glycerophospholipids	-1	-1	-1	578.28442:250 578.34546:9491 579.34955:3310 580.35229:974 581.31757:886 582.32416:231	279.23105:510 504.30844:709	966.159
2-Hydroxyacetophenone	4.30007	137.059	2566.62	38431.7	230.343	[M+H]+	Postive	ZWVHTXAYIKBMEE-UHFFFAOYSA-N	Organic oxygen compounds	Organooxygen compounds	-1	-1	-1	136.9325:224 137.05907:3028 137.09245:273 137.96422:670 138.09041:1019 139.07399:265 139.95897:634 140.95085:1191 141.08856:212 141.11314:1224 141.95802:3232	94.04005:250	992.055
2-(5,6-dihydroxy-3-methoxycarbonylcyclohex-3-en-1-yl)oxypropanoic acid	0.78715	278.123	4216.27	38245	229.224	[M+Na]+	Postive	QEIITRXHOIHGMT-UHFFFAOYNA-N	Organic acids and derivatives	Carboxylic acids and derivatives	-1	-1	-1	277.99997:432 278.08807:722 278.12314:8934 279.03622:370 279.07095:814 279.12753:895 279.98752:233 280.05313:869 280.13928:6134 280.19446:211 280.26474:207 280.55487:220 281.07007:3136 281.14417:1303 281.57166:847 282.01187:318 282.07843:274 282.11899:484 282.14496:264 282.19046:247 282.28009:722 282.56927:349 283.03085:220 283.09473:247		954.89
(3R,5R)-3,5-bis[[(E)-3-(3,4-dihydroxyphenyl)prop-2-enoyl]oxy]-1,4-dihydroxycyclohexane-1-carboxylic acid	6.07577	539.115	6138.1	38006.3	227.794	[M+Na]+	Postive	KRZBCHWVBQOTNZ-UHFFFAOYNA-N	Organic oxygen compounds	Organooxygen compounds	-1	-1	-1	539.1153:8542 540.11829:2776 540.23895:373 541.11981:627		825.981
2',3',6-Trimethoxyflavone	8.09353	313.108	4197.8	37735.1	226.168	[M+H]+	Postive	JAJRYQVSBTWNTH-UHFFFAOYSA-N	Phenylpropanoids and polyketides	Flavonoids	-1	-1	-1	313.10776:7914 313.16275:349 313.21674:397 313.24854:276 314.11066:1688 315.08319:233 315.11426:219 315.1908:345 315.25491:234 317.10062:205 317.17065:317 317.21286:209		743.144
6-[(4E,6E)-2,3-dihydroxy-4,6-dimethyl-7-(1,2,4-trimethyl-3,6-dioxabicyclo[3.1.0]hexan-4-yl)hepta-4,6-dien-2-yl]-4-methoxy-3,5-dimethylpyran-2-one	7.8755	417.226	3861.21	37685	225.868	[M+H]+	Postive	UXTZIHZDUIRZDY-JASOSIDASA-N	Lipids and lipid-like molecules	Fatty Acyls	-1	-1	-1	417.1535:1769 417.18521:657 417.22607:8633 418.23035:2550 419.16357:252 419.20673:1567 420.14151:377 420.20847:432 421.22702:386 422.11734:764	257.15222:389	976.292
2,3-DIHYDROXYBENZOATE	4.05737	153.019	3473.7	37665.9	225.753	[M-H]-	Negative	GLDQAMYCGOIJDV-UHFFFAOYSA-N	Benzenoids	Benzene and substituted derivatives	-1	-1	-1	153.01895:7926 153.99202:254 154.02237:716 154.99956:361 156.9906:474	65.03866:360 68.99509:328	992.259
4-Hydroxy-3-methoxymandelic acid	0.991	197.045	1422.77	37641.7	225.608	[M-H]-	Negative	CGQCWMIAEPEHNQ-UHFFFAOYSA-N	Benzenoids	Phenols	-1	-1	-1	197.01385:252 197.04477:2380 197.80768:1048 198.08296:385 199.90134:208 201.0256:5913 201.07788:351 202.02707:1007	61.98805:735	985.688
CMPF	2.2041	239.093	2099.47	37622.5	225.493	[M-H]-	Negative	WMCQWXZMVIETAO-UHFFFAOYSA-N	Lipids and lipid-like molecules	Fatty Acyls	-1	-1	-1	239.09332:2180 240.09723:528 241.08258:934 241.89999:739 243.12694:280 243.89949:681 243.91696:325	61.98885:383	982.704
2,3,8,9,10-pentamethoxy-6a,11a-dihydro-6H-[1]benzofuro[3,2-c]chromene	7.68862	375.144	3970.49	37580.7	225.242	[M+H]+	Postive	VNXYHRRGEDIKJZ-UHFFFAOYSA-N	Phenylpropanoids and polyketides	Isoflavonoids	-1	-1	-1	375.14404:9183 375.21243:227 376.10254:366 376.14713:1521 377.10089:248 377.14169:460 378.15414:212 379.13904:679 379.16843:284		978.078
Acetanilide	3.58377	136.073	3736.79	37469.1	224.574	[M+Na]+	Postive	FZERHIULMFGESH-UHFFFAOYSA-N	Benzenoids	Benzene and substituted derivatives	-1	-1	-1	136.07283:7065 137.07538:647 137.96428:664 137.99623:226 138.03012:300 138.07677:417 138.08803:256 138.12581:234 138.96349:357 139.98688:264 140.11342:208 140.95164:689 141.05441:2139		982.976
3-Hydroxypyridine	1.96823	94.0295	3056.99	37361.2	223.927	[M-H]-	Negative	GRFNBEZIAWKNCO-UHFFFAOYSA-N	Organoheterocyclic compounds	Pyridines and derivatives	-1	-1	-1	94.02952:3502 94.98064:1215 95.03505:590 96.96022:4019 97.02899:376 98.95805:422 99.00759:1118	66.0343:228 76.96906:203 79.95776:500 94.03049:224	914.29
Dehydrophytosphingosine (not validated, isomer of 1679); PlaSMA ID-1677	10.0572	316.284	2149.92	37252.2	223.274	[M+H]+	Postive	CQKNELOTFUSOTP-UHFFFAOYNA-N	Organic nitrogen compounds	Organonitrogen compounds	-1	-1	-1	316.28455:2492 317.10162:245 317.13748:216 317.28815:464 318.30045:879 320.33179:252		979.831
Crystamidine	5.0131	310.107	4156.81	37035.8	221.977	[M+H]+	Postive	NZMLLYZLUYBOGO-UHFFFAOYNA-N	Alkaloids and derivatives	Erythrina alkaloids	-1	-1	-1	310.10709:10257 311.11285:1357 311.20767:270 312.11447:340 312.16852:453 313.14954:259 313.17532:209		926.942
MLS001159936-01	10.8338	483.168	3875.57	37020.6	221.886	[M+H]+	Postive	KHAMBCHKQKEHIP-AEFFLSMTSA-N	Alkaloids and derivatives	Lupin alkaloids	-1	-1	-1	483.16809:7116 483.29428:202 484.17252:2064 485.17285:745 485.1954:573 485.25955:266 485.30365:204 487.2692:465 487.33298:226		798.213
1-[2-[(7-methyl-4-oxo-2,3-dihydro-1H-cyclopenta[c]chromen-9-yl)oxy]acetyl]piperidine-4-carboxylic acid	9.059	386.161	3554.63	37007.3	221.806	[M+H]+	Postive	JYYHHWORDMMSHE-UHFFFAOYSA-N	Phenylpropanoids and polyketides	Coumarins and derivatives	-1	-1	-1	386.1608:1417 387.16815:427 388.16162:223		775.232
Pazufloxacin	6.38278	319.112	9668.76	36587.6	219.291	[M+NH4]2+	Postive	XAGMUUZPGZWTRP-ZETCQYMHSA-N	Organoheterocyclic compounds	Quinolines and derivatives	-1	-1	-1	319.11215:9504 319.1778:302 319.61343:2836 320.11209:868 320.61475:211 321.11261:244 322.10709:2822 323.11447:6714 323.16827:467 323.20724:294	257.15445:215	984.428
CAFFEIC ACID	2.8106	179.036	2213.15	36362.6	217.942	[M-H]-	Negative	QAIPRVGONGVQAS-DUXPYHPUSA-N	Phenylpropanoids and polyketides	Cinnamic acids and derivatives	915.755	670.631	666.667	179.03558:3017 180.03838:724 183.03023:248 183.06467:345 183.10446:289	134.03758:212 135.04483:608	769.775
(3E,5S,8R,11E,13S,16R)-5,13-dihydroxy-8,16-dimethyl-1,9-dioxacyclohexadeca-3,11-diene-2,10-dione	3.92635	330.19	2209.83	36215.6	217.061	[M+H]+	Postive	RBQNDQOKFICJGL-UTBFYLPBSA-N	Phenylpropanoids and polyketides	Macrolides and analogues	-1	-1	-1	330.13141:282 330.1897:3120 331.12546:293 331.19263:250		961.448
Biochanin-7-O-glucoside	4.86602	445.114	3413.23	36156.8	216.708	[M-H]-	Negative	LFEUICHQZGNOHD-UHFFFAOYNA-N	Phenylpropanoids and polyketides	Isoflavonoids	-1	-1	-1	445.11411:7751 445.20291:348 446.11725:1899 446.18329:1018 447.10519:826 447.18332:608 447.22009:562 448.09506:531 448.12109:266 448.19168:295 449.23996:225	59.01361:757 283.05508:283	856.452
Spiro[furan-3(2H),1'(4'H)-naphthalene]-4'a,5'(5'H)-dicarboxylic acid, 6'-(acetyloxy)-5-(3-furanyl)-4,5,6',7',8',8'a-hexahydro-5'-hydroxy-2'-methyl-2-oxo-, dimethyl ester	0.75515	521.167	4163.5	36105.6	216.401	[M-H]-	Negative	NOSUBWMAOPEEBW-UHFFFAOYNA-N	Lipids and lipid-like molecules	Prenol lipids	-1	-1	-1	521.0813:1224 521.16742:13038 522.08569:225 522.17157:2399 523.03461:270 523.07941:331 523.17639:1083 524.16077:636 526.03595:233		915.322
1-[(Z)-but-2-en-2-yl]-3,9-dihydroxy-4,7-dimethyl-6-oxobenzo[b][1,4]benzodioxepine-2-carboxylic acid	4.63017	369.1	4138.63	36104.3	216.394	[M-H]-	Negative	DFNFONZYWQXTIJ-YVMONPNESA-N	Phenylpropanoids and polyketides	Depsides and depsidones	-1	-1	-1	369.10028:13614 370.10406:3131 371.10254:566 371.13272:366 371.16751:442 373.09573:238 373.1188:320 373.18637:321	96.95942:296 172.09029:303 245.15221:363 289.14413:2445 290.1459:323 291.14792:202	986.58
L-2,3-DIAMINOPROPIONIC ACID	9.9638	105.063	3773.14	36082.4	216.262	[M+H]+	Postive	PECYZEOJVXMISF-UHFFFAOYNA-N	Organic acids and derivatives	Carboxylic acids and derivatives	-1	-1	-1	105.06302:7625 105.94745:762 106.06628:404 106.51456:275 107.03857:1208 107.06145:253 107.07944:486 107.53833:249 107.95982:441 109.06995:423 109.09349:452 110.00083:344		943.342
Magnolol	9.4147	311.129	3182.82	36017.8	215.875	[M-H]-	Negative	VVOAZFWZEDHOOU-UHFFFAOYSA-N	Benzenoids	Benzene and substituted derivatives	-1	-1	-1	311.09241:265 311.12863:5129 311.22021:654 312.13196:679 313.05231:254 313.14523:664 315.05008:292 315.15259:259	107.04986:1492	979.641
FA 13:3+1O; PlaSMA ID-329	7.056	223.133	3591.41	35963.4	215.549	[M-H]-	Negative	XHDHWGKEDVWKAN-UHFFFAOYSA-N	Lipids and lipid-like molecules	Fatty Acyls	-1	-1	-1	223.13327:7365 224.13751:838 225.92534:380 227.12749:347		985.581
(2Z)-2-[(E)-11-hydroxy-6-(hydroxymethyl)-2,4,8,10-tetramethyldodec-2-enylidene]-4-methylpentanedioic acid	13.6939	411.276	3364.88	35645.8	213.646	[M-H]-	Negative	YOSAXDOXINGSJA-UHFFFAOYNA-N	Lipids and lipid-like molecules	Prenol lipids	-1	-1	-1	411.27548:8462 412.27789:2663 413.28772:370 413.3241:486 413.36157:220 414.32571:252 415.34216:647 416.13239:243	59.01343:681 297.24274:203	988.889
[4-[3,4,5-trihydroxy-6-(hydroxymethyl)oxan-2-yl]oxyphenyl]methyl 3-acetyloxy-2-hydroxy-2-[(4-hydroxyphenyl)methyl]butanoate	6.09377	554.224	5155.5	35543.1	213.03	[M+NH4]+	Postive	OCPITUSJSRGORS-UHFFFAOYNA-N	Organic oxygen compounds	Organooxygen compounds	-1	-1	-1	554.22388:9718 555.08539:1148 555.22839:3275 556.09747:320 556.23016:467 559.17889:4736		928.922
Mycophenolate mofetil (CellCept)	9.09015	434.217	3854.13	35539.4	213.008	[M+NH4]+	Postive	RTGDFNSFWBGLEC-UHFFFAOYSA-N	Organoheterocyclic compounds	Isocoumarans	-1	-1	-1	434.21722:8128 435.21994:2701 436.22049:621 437.15802:653 437.21661:18783 437.3367:419 438.21954:4878 439.17398:8476	107.04752:364 123.04388:630 149.05777:417 163.07182:202 201.08829:351 257.15204:11502 258.1579:208 357.16589:274 401.19342:263 419.20071:246	965.162
[(2R,3S,4R,5R,6R)-6-[2-(3,4-dihydroxyphenyl)ethoxy]-4,5-dihydroxy-2-[[(2R,3R,4R,5R,6S)-3,4,5-trihydroxy-6-methyloxan-2-yl]oxymethyl]oxan-3-yl] (E)-3-(3,4-dihydroxyphenyl)prop-2-enoate	5.74205	659.174	3161.87	35511.1	212.839	[M-H]-	Negative	DTOUWTJYUCZJQD-UJERWXFOSA-N	Phenylpropanoids and polyketides	Cinnamic acids and derivatives	-1	-1	-1	659.17438:5722 659.24896:519 660.18164:1779 660.24951:578 661.17346:2420 661.26617:211 662.17639:699		997.274
5-methoxy-8,8-dimethyl-2-phenylpyrano[2,3-h]chromen-4-one	10.0261	335.125	3778.72	35470.1	212.593	[M+Na]+	Postive	DPAGRPSAFDXQDN-UHFFFAOYSA-N	Phenylpropanoids and polyketides	Flavonoids	-1	-1	-1	335.12497:6908 335.22186:447 336.12781:1757 337.1322:204 338.34055:7674 339.34546:1355		895.014
Isoflavone base + 2O + 1MeO + 1Prenyl; PlaSMA ID-822	11.4364	351.123	3180.49	35420	212.293	[M-H]-	Negative	JQNSUDIGIIGIOL-UHFFFAOYSA-N	Phenylpropanoids and polyketides	Isoflavonoids	-1	-1	-1	350.86938:317 351.12329:4780 351.18115:207 352.08783:225 352.12579:933 353.10269:10395 353.1705:342 354.10608:1600 355.10632:565 355.16629:241	259.0997:249 336.09988:282 351.08865:494 351.12137:864	753.359
1,2-Dilauroyl-sn-glycero-3-phosphate	15.0081	535.34	3229.77	35241.9	211.225	[M-H]-	Negative	OKLASJZQBDJAPH-RUZDIDTESA-N	Lipids and lipid-like molecules	Glycerophospholipids	-1	-1	-1	534.91333:1835 535.33954:5442 535.90497:9150 536.16486:368 536.34314:1728 536.90948:1520 537.33795:2208 537.40735:217 537.44971:229 537.90216:8322 538.33832:838 538.85333:664 538.90839:825 539.46301:227 539.84241:208 539.89972:2537	61.98813:6940	934.986
Cholic acid	12.6157	407.283	3124.01	35115.2	210.466	[M-H]-	Negative	BHQCQFFYRZLCQQ-UHFFFAOYSA-N	Lipids and lipid-like molecules	Steroids and steroid derivatives	-1	-1	-1	407.18585:19053 407.28326:5437 408.18893:4942 408.28397:978 408.319:485 409.1915:1114 409.23242:260 409.29166:619 412.21472:223	112.98387:364 161.09737:1105 162.09991:246 177.09222:458 185.09663:407 187.11314:309 189.01863:375 201.09088:410 202.09454:234 219.10095:488 245.08139:2612 246.08417:247 407.28244:316	985.646
Glutamyl-S-(C4H7O2)-Cysteine; PlaSMA ID-1841	8.93443	337.106	3720.74	34981.3	209.663	[M+H]+	Postive	USEJNLPKVXGAOO-UHFFFAOYNA-N			-1	-1	-1	337.04373:296 337.10651:8281 337.22867:235 338.10876:1229 338.13556:784 338.23459:216 338.34103:5298 339.12027:627 339.34549:1192		975.711
Quinic acid	3.24862	191.057	2118.04	34959	209.529	[M-H]-	Negative	AAWZDTNXLSGCEK-UHFFFAOYNA-N	Organic oxygen compounds	Organooxygen compounds	-1	-1	-1	191.05658:3470 191.85541:889 192.06676:368 193.06631:232 195.81116:1150 195.90471:588 196.03694:347	134.0361:207 145.8618:266	991.466
Sparteine-15-carboxylic acid	7.68862	279.204	3873.36	34925.3	209.328	[M+H]+	Postive	FNCNQQDYISRCJG-UHFFFAOYNA-N	Alkaloids and derivatives	Lupin alkaloids	-1	-1	-1	279.15482:382 279.20419:9154 280.15677:296 280.20755:1646 281.17047:208 281.20831:314 282.27991:412 283.28613:264		910.718
2`-Methylacetanilide	0.8183	150.09	3188.52	34895	209.146	[M+H]+	Postive	BPEXTIMJLDWDTL-UHFFFAOYSA-N	Benzenoids	Benzene and substituted derivatives	-1	-1	-1	150.09048:7327 150.94438:327 150.96104:258 151.05479:475 151.09325:719 152.02533:207 152.05737:13302 152.10373:680 152.99666:222 153.05771:791 153.10567:394 154.0502:757 154.09531:2667 154.11954:600 154.9765:419 155.02206:212 155.07117:344	135.02628:211	969.404
3,5,9,23-Tetrahydroxy-18,22-cycloergosta-6,8(14)-dien-11-one	5.89228	441.3	4220.2	34848.4	208.866	[M+H]+	Postive	MUYUFHKTKLPWIW-UHFFFAOYNA-N	Lipids and lipid-like molecules	Steroids and steroid derivatives	-1	-1	-1	441.2999:11794 442.30316:2830 443.30411:500 445.11496:280 445.26266:247		905.586
(2S,3R,10R,13R,14S)-2,3,14-trihydroxy-10,13-dimethyl-17-[(2R,3R,5R)-2,3,5-trihydroxy-5,6-dimethylheptan-2-yl]-2,3,4,5,9,11,12,15,16,17-decahydro-1H-cyclopenta[a]phenanthren-6-one	5.89228	477.321	4160.11	34388.6	206.11	[M+H]+	Postive	YXPVYQIMXPYFSF-UHFFFAOYNA-N	Lipids and lipid-like molecules	Steroids and steroid derivatives	-1	-1	-1	477.32126:12046 478.32471:3587 479.32794:871 481.16599:238		989.41
2-Propenoic acid, 2-methyl-, (3aR,4S,6R,11aR)-2,3,3a,4,5,6,7,8,9,11a-decahydro-6,9-dihydroxy-6,10-dimethyl-3-methylene-2,7-dioxocyclodeca[b]furan-4-yl ester	6.88755	409.152	2159.79	34254.9	205.309	[M-H]-	Negative	JGWDBQRLOBLTHU-UHFFFAOYNA-N	Lipids and lipid-like molecules	Prenol lipids	-1	-1	-1	409.1524:5246 410.15195:766 411.15485:251 411.20224:1345 411.7048:684 412.2016:411	59.01383:229	720.26
Cohumulone	7.056	347.187	3247.78	34151.4	204.689	[M-H]-	Negative	DRSITEVYZGOOQG-UHFFFAOYNA-N	Organic oxygen compounds	Organooxygen compounds	821.416	679.073	500	346.8728:273 347.02365:789 347.0705:213 347.18677:7328 348.07205:1016 348.18933:1540 348.8699:383 349.15466:531 349.1925:641 350.05322:267 350.08972:239	61.98752:730 347.18561:1826	993.549
Bisdemethoxycurcumin; LC-ESI-ITTOF; ; [M-H]-	10.7962	307.098	3488.75	34092.1	204.333	[M-H]-	Negative	PREBVFJICNPEKM-YDWXAUTNSA-N	Phenylpropanoids and polyketides	Diarylheptanoids	-1	-1	-1	307.0975:7795 308.10089:1329 309.10709:474 309.1709:605 309.20718:360 310.17526:242 311.16806:1299 311.22168:4660		949.176
Duguetine	4.33122	356.148	3785.43	34077.7	204.247	[M+H]+	Postive	ZAVWGRCRKSHIMO-UHFFFAOYNA-N	Alkaloids and derivatives	Aporphines	-1	-1	-1	356.10931:412 356.14841:6979 357.15274:1474 358.16367:1922 359.09705:248 359.17047:643		989.68
Nandrolone	12.1731	275.2	1595.82	34046.7	204.061	[M+H]+	Postive	NPAGDVCDWIYMMC-IZPLOLCNSA-N	Lipids and lipid-like molecules	Steroids and steroid derivatives	-1	-1	-1	275.19952:1513 275.27859:472 275.89771:244 276.20346:274 277.21378:598 278.21658:319 279.09244:406 279.23114:1856 279.8869:251	91.05308:327	915.719
(2R,3S,4S,5R,6S)-2-[[(2S,3R,4R)-3,4-dihydroxy-4-(hydroxymethyl)oxolan-2-yl]oxymethyl]-6-(3,4,5-trimethoxyphenoxy)oxane-3,4,5-triol	4.20662	496.202	3879.85	33978.3	203.651	[M+NH4]+	Postive	CKGKQISENBKOCA-UHFFFAOYNA-N	Organic oxygen compounds	Organooxygen compounds	-1	-1	-1	496.20184:8991 497.20367:2568 498.00891:503 498.21088:646 499.18365:261 501.15808:13881		988.065
Quercetin-3-O-glucuronide	4.83233	477.067	3325.37	33970.3	203.603	[M-H]-	Negative	DUBCCGAQYVUYEU-UHFFFAOYNA-N	Phenylpropanoids and polyketides	Flavonoids	-1	-1	-1	477.06726:8542 477.19467:212 478.06912:2085 479.07681:407 480.07224:355 481.14404:339		970.966
Norharman	4.63933	169.077	3474.62	33958	203.53	[M+H]+	Postive	AIFRHYZBTHREPW-UHFFFAOYSA-N	Organoheterocyclic compounds	Indoles and derivatives	739.462	712.893	500	169.04846:206 169.077:7681 169.97449:251 170.07809:952 171.09924:564 172.95697:268 173.07822:471	115.05443:232 169.07564:1427	993.29
NCGC00179993-02	9.9015	343.118	3815.55	33739.6	202.221	[M+H]+	Postive	MHCYVCDXRQGUFW-UHFFFAOYNA-N	Benzenoids	Tetralins	-1	-1	-1	343.11786:8494 343.18866:201 344.12192:1812 344.24088:378 345.12393:510 345.16492:765 345.20688:1144 346.21078:248 347.17926:1223 347.22061:1495 347.2608:392	139.11121:240	890.914
Imipramine	6.14073	281.201	4070.87	33553.7	201.107	[M+H]+	Postive	BCGWQEUPMDMJNV-UHFFFAOYSA-N	Organoheterocyclic compounds	Benzazepines	-1	-1	-1	281.20096:5357 282.20496:1242 282.27933:900	144.08038:209	876.679
MPL-dm	4.30007	254.174	3951.21	33544.6	201.052	[M+H]+	Postive	CUKXSBOAIJILRY-UHFFFAOYNA-N	Benzenoids	Phenols	-1	-1	-1	254.10765:254 254.14052:437 254.17433:10035 254.89514:230 255.10194:335 255.17685:1658 255.22737:244 255.26561:249 256.06598:219 256.17831:248 256.23782:208 257.09323:506 258.10355:333 258.17236:443 259.06131:219 259.0874:215		988.714
C21H36O11	5.67423	487.216	2914.81	33480.3	200.667	[M+Na]+	Postive	MPYSZNHNOUOLSB-UHFFFAOYNA-N	Organic oxygen compounds	Organooxygen compounds	-1	-1	-1	487.09335:539 487.21552:4691 488.21884:1266 489.1489:258 489.21771:434 491.14169:218 491.19446:384 491.22479:228 492.11002:260 492.20367:223		899.378
(7E)-3-Isobutyl-13-methoxy-4,5,8-trimethyl-3,3a,4,6a,9,10,11,12,13,14-decahydro-1H-cycloundeca[d]isoindole-1,15(2H)-dione	15.1509	424.282	4560.6	33221.3	199.114	[M+H]+	Postive	BECNNJLLIXQSGY-FOWTUZBSSA-N	Organoheterocyclic compounds	Isoindoles and derivatives	-1	-1	-1	424.2821:7436 425.2182:340 425.28699:1900 425.33072:464 425.37573:226 426.28177:671 427.30194:220 427.3403:274 429.27484:537		992.687
2-(1,2-dihydroxypentyl)-4-methoxy-2,3-dihydropyran-6-one	0.8183	248.147	2489.64	33032.7	197.984	[M+H]+	Postive	YLHOHANRUSKHKO-UHFFFAOYSA-N	Organoheterocyclic compounds	Pyrans	-1	-1	-1	248.00385:272 248.02213:245 248.11391:1378 248.14662:2611 248.17639:1102 248.55455:206 249.00601:712 249.09436:204 249.11131:232 249.15172:499 249.174:351 250.09065:342 250.1256:383 250.16495:545 251.03868:245 251.07654:639 252.00261:234 252.06599:211 252.1076:867 252.22954:301 253.07513:417 253.1163:623		988.546
Biflavonoid-flavone base + 3O and flavone base + 2O + 1MeO; PlaSMA ID-1507	4.76493	551.097	2696.04	33008.4	197.839	[M-H]-	Negative	IWEIJEPIYMAGTH-UHFFFAOYSA-N	Phenylpropanoids and polyketides	Flavonoids	-1	-1	-1	551.0968:5865 551.19757:373 552.09686:1720 553.09442:2648 554.09448:627 555.16052:492	61.9876:577 353.08643:928	876.012
2-(1,2-dihydroxyethyl)-3-[(E)-3-(3,4-dihydroxyphenyl)prop-2-enoyl]oxy-4-hydroxy-3,4-dihydro-2H-pyran-6-carboxylic acid	3.08543	383.094	3066.24	32992.3	197.742	[M+H]+	Postive	LYTOSEBVFHNSFK-DUXPYHPUSA-N	Phenylpropanoids and polyketides	Cinnamic acids and derivatives	-1	-1	-1	383.09433:3596 384.09827:823 385.09631:212		886.296
Acetylproline; PlaSMA ID-280	2.52483	158.081	1590.78	32978.3	197.658	[M+H]+	Postive	GNMSLDIYJOSUSW-UHFFFAOYNA-N	Organic acids and derivatives	Carboxylic acids and derivatives	-1	-1	-1	157.96519:1624 158.00192:2818 158.08134:1637 158.48218:263 158.9734:6749 159.0985:211 159.99014:1465 160.05423:351 161.96068:213 161.99712:225 162.04979:355 162.07599:245		979.694
4-[4-(1,3-benzodioxol-5-yl)-2,3-dimethylbutyl]-2-methoxyphenol	10.1195	329.172	3529.72	32740.8	196.235	[M+Na]+	Postive	QDDILOVMGWUNGD-UHFFFAOYSA-N	Lignans, neolignans and related compounds	Dibenzylbutane lignans	-1	-1	-1	329.17169:8422 329.20718:2286 330.17444:1561 330.21121:620 331.14871:413 331.18472:593 331.20984:284 332.28134:321 333.06818:306 333.16647:230 333.20316:3897		954.77
(4S,5Z,6S)-5-[2-[(E)-3-(4-hydroxyphenyl)prop-2-enoyl]oxyethylidene]-4-(2-methoxy-2-oxoethyl)-6-[(2S,3R,4S,5S,6R)-3,4,5-trihydroxy-6-(hydroxymethyl)oxan-2-yl]oxy-4H-pyran-3-carboxylic acid	3.83293	584.197	3712.93	32712.9	196.067	[M+H]+	Postive	MGEVYVDQMTWJNV-UHFFFAOYNA-N	Lipids and lipid-like molecules	Prenol lipids	-1	-1	-1	584.1969:8143 584.28149:237 585.20001:2509 586.20245:212		890.23
Tyrphostin AG 698	5.58078	309.124	3611.79	32698.5	195.981	[M+H]+	Postive	ZZQHNBGRWRQWFI-XNTDXEJSSA-N	Phenylpropanoids and polyketides	Cinnamic acids and derivatives	-1	-1	-1	309.12387:9640 309.20325:257 310.12643:1865 311.10455:450 311.17447:304 311.19949:229 312.18103:478 313.09006:303 313.10953:332 313.16382:211		992.145
PI(16:0/13-HODE)	13.9298	849.512	2666.49	32553	195.109	[M-H]-	Negative	VCQUGGHDBKGPHY-RSQAHCHINA-N			-1	-1	-1	849.40613:234 849.51227:3910 850.51544:1778 851.5166:739 852.51392:216 853.0105:243		977.22
Tryptophan; PlaSMA ID-689	3.42805	205.097	3366.97	32505.7	194.825	[M+NH4]+	Postive	QIVBCDIJIAJPQS-UHFFFAOYNA-N	Organoheterocyclic compounds	Indoles and derivatives	-1	-1	-1	204.97897:223 205.09702:6403 206.02478:247 206.09845:761 206.98663:256 207.10284:1872 207.60074:229 207.93169:283 208.09911:1226 208.13026:376 208.60092:286 208.94559:223 209.08083:280 209.13858:3820 209.95891:247	146.05862:463	956.344
1,7-bis(4-hydroxyphenyl)heptan-3-one	7.494	343.155	3198.71	32483.7	194.694	[M-H]-	Negative	QUHYUSAHBDACNG-UHFFFAOYSA-N	Phenylpropanoids and polyketides	Diarylheptanoids	-1	-1	-1	343.07861:284 343.117:239 343.15518:6389 343.20743:837 344.15744:1343 345.09637:263 345.16953:2495 346.06934:237 346.17587:250 346.86899:355 347.10855:293 347.18436:902 348.07126:925	301.17938:643 343.1543:450	958.709
7-benzyl-11,14,20-trimethyl-16-(2-methylpropyl)-10,13-di(propan-2-yl)-17-oxa-1,5,8,11,14-pentazabicyclo[17.3.0]docosane-2,6,9,12,15,18-hexone	16.5917	668.402	2166.92	32482.2	194.685	[M-H]-	Negative	UCLZXGHPVJMYSQ-UHFFFAOYNA-N	Organic acids and derivatives	Peptidomimetics	-1	-1	-1	668.4021:3655 669.4054:1664 670.41809:473 670.49103:266 671.46185:692 672.46393:272 673.39154:415	61.98751:455 152.99471:235	973.259
alpha-D-Glucopyranoside, 4-O-acetyl-6-O-(2-methyl-1-oxobutyl)-1-O-(3-methyl-1-oxobutyl)-beta-D-fructofuranosyl 2-O-[(2E)-2-methyl-1-oxo-2-buten-1-yl]-, 6-acetate	12.1108	699.279	3532.77	32458.8	194.544	[M+Na]+	Postive	LPCRSLMVMNEPGT-RMDLPFQISA-N	Lipids and lipid-like molecules	Saccharolipids	-1	-1	-1	699.27936:7693 700.28394:2480 701.28485:843 702.289:203		864.638
3-Hydroxybenzaldehyde	4.82622	123.044	3285.53	32369.9	194.011	[M+H]+	Postive	IAVREABSGIHHMO-UHFFFAOYSA-N	Organic oxygen compounds	Organooxygen compounds	-1	-1	-1	122.9643:2272 123.0442:8311 123.07738:468 123.1159:240 123.96908:340 124.04628:460 124.96055:212 125.05855:611 125.98741:867 126.9839:213 127.00127:223 127.02477:867 127.07438:315	81.93668:515	780.779
4-Acetyl-2-hydroxyphenyl 2-O-beta-D-fructofuranosyl-beta-D-xylopyranoside	4.82622	469.134	3416.7	32192.5	192.948	[M+H]+	Postive	YOBMRYYTHXIXSD-SMTILKTDSA-N	Organic oxygen compounds	Organooxygen compounds	-1	-1	-1	469.13397:5611 470.13916:1114 471.14801:672 471.17215:497 472.18295:359 473.13489:297 473.19229:265		988.763
1H-Benzotriazole-5-carboxylic acid	6.38223	162.032	3126.04	32086.7	192.314	[M-H]-	Negative	GUOVBFFLXKJFEE-UHFFFAOYSA-N	Organoheterocyclic compounds	Benzotriazoles	-1	-1	-1	162.03172:5305 162.83762:2673 162.90288:1115 163.0045:200 163.03513:1217 164.03467:207 164.83484:672 164.98457:225 165.05515:423 166.05803:217 167.01306:206		707.324
Microviridin N	11.9862	905.429	3108.07	31952.1	191.507	[M+H]+	Postive	BCGKTBJHEZXJFM-UHFFFAOYNA-N	Organic acids and derivatives	Peptidomimetics	-1	-1	-1	905.4292:6797 906.4317:3520 907.43878:1691 908.41809:275 909.42957:244		978.764
beta-D-Glucopyranoside, 5-(4-hydroxyphenyl)-1-[2-(4-hydroxyphenyl)ethyl]pentyl 6-O-(6-deoxy-alpha-L-mannopyranosyl)-	7.4083	609.291	3747.87	31944.5	191.462	[M+H]+	Postive	JYQIWENZJDPRSV-WHJIMDRXSA-N	Phenylpropanoids and polyketides	Diarylheptanoids	-1	-1	-1	609.2345:291 609.29132:9240 610.21191:485 610.2915:2921 611.29559:661 613.16919:241		772.664
4-(4-hydroxy-2-methoxy-3,5,6-trimethylbenzoyl)oxy-2-methoxy-3,5,6-trimethylbenzoic acid	5.5062	447.168	3258.79	31887.2	191.119	[M-H]2-	Negative	MUQKNNNEHVXLOL-UHFFFAOYSA-N	Phenylpropanoids and polyketides	Depsides and depsidones	-1	-1	-1	447.1684:9162 447.66968:3824 448.12677:285 448.17233:1410 448.67349:416 449.14517:237 449.17554:378 450.12589:353 450.63477:323 451.11569:225 451.16205:439 451.19647:1318	59.0135:5952 85.02657:263 187.03874:279 271.13074:379 343.15353:261 391.17493:520 415.17194:298 433.18417:446	905.174
N-Acetylleucine	4.05092	174.113	2147.61	31804.4	190.622	[M+H]+	Postive	WXNXCEHXYPACJF-UHFFFAOYNA-N	Organic acids and derivatives	Carboxylic acids and derivatives	-1	-1	-1	174.11249:2463 174.15759:1006 175.01799:1627 175.97418:954 177.05339:390 177.06776:624 178.98801:256 179.06767:507		983.732
trans-Ferulic acid	2.23778	193.05	2114.17	31800.3	190.598	[M-H]-	Negative	KSEBMYQBYZTDHS-UHFFFAOYSA-N	Phenylpropanoids and polyketides	Cinnamic acids and derivatives	-1	-1	-1	192.9566:285 193.05048:1997 194.06082:228 194.95287:247 194.9917:599 195.0645:749 195.81094:658 195.90475:263 197.00946:214 197.06026:263 197.80727:1096	160.84039:452	829.604
(1S,3R,4R,5R)-1,3-dihydroxy-4,5-bis[[(E)-3-(4-hydroxy-3-methoxyphenyl)prop-2-enoyl]oxy]cyclohexane-1-carboxylic acid	5.91058	543.15	2659.31	31785	190.506	[M-H]-	Negative	WCIDSNIXNCYSPH-UHFFFAOYNA-N	Organic oxygen compounds	Organooxygen compounds	-1	-1	-1	543.14978:5440 544.1532:1683 545.08606:225 545.17236:357 547.18945:232		980.981
2-nitro-9-fluorenone	4.08207	226.049	2435.12	31711	190.062	[M+H]+	Postive	AJEAHBZZHSLIQP-UHFFFAOYSA-N	Benzenoids	Fluorenes	-1	-1	-1	226.04907:5114 226.10446:276 226.54768:1021 227.04884:331 227.17288:1141 228.19411:435 228.97786:320 229.08302:458 230.88931:213		984.949
Ethyl-4-dimethylaminobenzoate	10.8026	194.118	3582.48	31677.1	189.859	[M+H]+	Postive	FZUGPQWGEGAKET-UHFFFAOYSA-N	Benzenoids	Benzene and substituted derivatives	-1	-1	-1	194.11752:8258 195.12198:1319 195.99983:289 196.05577:224 198.12839:294 198.18512:435	117.06718:231	984.504
Flavone base + 3O, 2MeO, O-HexA; PlaSMA ID-2710	6.73363	507.113	3613.29	31639.5	189.634	[M+H]+	Postive	HJWFFBNADKDQPV-UHFFFAOYNA-N	Phenylpropanoids and polyketides	Flavonoids	-1	-1	-1	507.11301:7531 508.11594:1443 508.1904:226 509.11978:264 509.21204:244 510.16968:238 510.2081:446 510.24805:226 511.1705:306 511.19342:252		981.475
Val Met Glu	5.04425	378.168	3374.87	31637	189.619	[M+H]+	Postive	VENKIVFKIPGEJN-UHFFFAOYSA-N	Organic acids and derivatives	Carboxylic acids and derivatives	-1	-1	-1	378.16818:8864 379.16992:1480 380.16611:2428 381.16061:599 382.16162:352 382.2193:216 383.15887:363		977.282
Palmitoleic acid	12.9864	253.217	2979.5	31606.4	189.435	[M-H]-	Negative	SECPZKHBENQXJG-UHFFFAOYSA-N	Lipids and lipid-like molecules	Fatty Acyls	-1	-1	-1	253.21709:6337 254.22057:742 255.10039:232 255.23163:1429 255.54105:258 256.0737:253 256.23514:511 257.9404:208		968.561
Sinapoyl aldehyde	6.38223	207.066	3195.65	31484.8	188.707	[M-H]-	Negative	CDICDSOGTRCHMG-UHFFFAOYSA-N	Benzenoids	Phenols	-1	-1	-1	207.06598:7110 208.06894:1170 209.04521:238 209.06706:453 209.15417:1109 210.97047:222 211.1357:337	121.02981:237 149.02336:358 177.01883:1155 192.04376:491	955.93
Naringenin-7-O-glucoside	5.97797	433.113	2936.92	31288	187.527	[M-H]-	Negative	DLIKSSGEMUFQOK-SFTVRKLSSA-N	Phenylpropanoids and polyketides	Flavonoids	557.689	685.91	500	433.11295:7767 433.18634:561 434.11713:1864 435.12277:322 435.20142:1008 436.13083:387 436.20514:206	61.98842:571 271.0603:379	993.52
Ellipticine	6.67135	247.122	3163.41	31086.5	186.319	[M+H]+	Postive	CTSPAMFJBXKSOY-UHFFFAOYSA-N	Organoheterocyclic compounds	Indoles and derivatives	-1	-1	-1	247.08067:854 247.12242:4400 248.12695:1307 249.09045:3318 249.1411:385 250.09607:1184 251.12653:221 251.16406:292		989.71
Galactosamine	0.724867	180.087	3401.77	31056.9	186.142	[M+H]+	Postive	MSWZFWKMSRAUBD-UHFFFAOYNA-N	Organic oxygen compounds	Organooxygen compounds	-1	-1	-1	180.03667:265 180.08675:5932 181.04842:240 181.06961:333 181.0901:348 182.08432:226 183.06216:239 183.08646:2035 184.06413:17511 184.13776:267 185.04338:227 185.06975:1079		902.526
Tobramycin, deactivated 2'' phosphorylation, 6' N-acetylation	5.54963	590.245	1996.57	31054.5	186.128	[M+H]+	Postive	XYEKESXODZZYMD-UHFFFAOYNA-N			-1	-1	-1	590.24493:1936 591.2218:748 592.21173:346 592.24939:320 592.29718:229 593.1828:227 593.22961:301 594.20514:314 595.19867:1366		987.021
19-NORETHINDRONE ACETATE	6.67135	341.212	3377.59	31053.6	186.122	[M+H]+	Postive	IMONTRJLAWHYGT-ZCPXKWAGSA-N	Lipids and lipid-like molecules	Steroids and steroid derivatives	-1	-1	-1	341.13626:713 341.21179:6651 342.16275:306 342.21478:745 343.15271:612 343.18716:333 345.12744:526 346.10046:637		801.425
(7R,8R)-7,8-Dihydroxy-3,5,7-trimethyl-7,8-dihydro-6H-isochromen-6-one	4.30007	205.085	3300.72	31034.9	186.01	[M+H]+	Postive	JVUYBLROBHJEJN-NEPJUHHUSA-N	Organoheterocyclic compounds	Azaphilones	-1	-1	-1	205.08528:7458 206.0872:912 207.0968:496 208.09921:442 208.13182:556 208.95862:221 209.09389:441 209.11534:593 209.13788:891		769.366
Kaempferol-4'-methyl ether	6.4845	301.071	4290.64	30973.8	185.644	[M+H]+	Postive	SQFSKOYWJBQGKQ-UHFFFAOYSA-N	Phenylpropanoids and polyketides	Flavonoids	618.59	740.374	500	301.07089:6481 301.36472:207 302.0737:1078 303.07831:341 303.11087:217 303.15372:219 304.08548:217 305.08255:216	269.04428:240 301.06989:1011	996.529
FAHFA 38:2	16.1536	589.518	2804.81	30832.3	184.796	[M-H]-	Negative	HDTRAHIKOUGYSG-NBTONZODNA-N			-1	-1	-1	589.32611:312 589.44507:235 589.51837:5258 590.3916:289 590.45117:247 590.52063:1865 591.4613:629 591.52124:216 592.47083:440		871.472
2-DEOXY-D-GLUCOSE	0.72145	163.061	2849.45	30831.5	184.791	[M-H2O-H]-	Negative	VRYALKFFQXWPIH-UHFFFAOYSA-N	Lipids and lipid-like molecules	Fatty Acyls	-1	-1	-1	162.93864:336 163.02411:1618 163.06108:5662 164.06361:241 164.89696:342 164.91208:205 165.04109:1891 165.07394:422 167.02263:2201 168.03319:572 168.04727:342		978.875
Isodityrosine (not validated); PlaSMA ID-2020	10.7737	361.141	3575.58	30816.5	184.701	[M+Na]+	Postive	FWZXNPNHUWFOCM-UHFFFAOYNA-N	Organic acids and derivatives	Carboxylic acids and derivatives	-1	-1	-1	361.09857:262 361.14105:8186 362.14331:2291 362.26422:254 363.14902:507 364.15311:222		708.064
N-Acetylneuraminic acid	0.72145	308.098	3255.98	30785.5	184.515	[M-H]-	Negative	SQVRNKJHWKZAKO-LUWBGTNYSA-N	Organic oxygen compounds	Organooxygen compounds	-1	-1	-1	308.09814:9929 309.05402:460 309.08957:2969 310.08624:434 310.11304:2746 310.93295:283 311.01892:384 311.10129:3804 312.1106:582 312.92709:739 313.01102:307 313.07657:609		971.066
(2S,4R,9a'S)-1'-Hydroxy-2',2'-dimethyl-4-(4-oxo-3(4H)-quinazolinyl)-1',9a'-dihydro-3H-spiro[furan-2,9'-imidazo[1,2-a]indole]-3',5(2'H,4H)-dione	0.75515	431.136	3390.38	30747.6	184.288	[M-H]-	Negative	NRWLZYIHXSJKCU-UHFFFAOYNA-N	Organic acids and derivatives	Carboxylic acids and derivatives	-1	-1	-1	431.13611:8619 432.13907:1440 433.12848:282 435.08765:216		921.247
Furostane base -2H + 1O, O-Hex, O-Pen-dHex; PlaSMA ID-2173	12.6157	933.469	3157.01	30553.6	183.125	[M-H]-	Negative	HWYCRLFVQVFKPD-UHFFFAOYNA-N	Lipids and lipid-like molecules	Steroids and steroid derivatives	-1	-1	-1	933.12878:256 933.30786:206 933.42566:6166 933.46881:7344 934.42938:3533 934.47394:1992 935.44073:24050 936.44397:13159 937.45026:5326 938.45062:1633		947.648
2'-Hydroxyflavanone	7.84435	241.085	3439.06	30367.6	182.01	[M+H]+	Postive	KZKWCKFDCPVDFJ-UHFFFAOYNA-N	Phenylpropanoids and polyketides	Flavonoids	-1	-1	-1	241.08517:7998 241.14014:313 242.00558:220 242.09314:16945 243.06049:236 243.1011:24065 244.10454:4255 245.08182:368 245.10905:507	152.06136:704 153.06963:836 157.0638:356 165.06897:1318 166.07278:302 171.07741:356 181.06389:1030 182.07182:397 185.05908:443 198.06674:235 212.08447:261	844.711
Vanillin	5.32457	153.055	3394.09	30338.1	181.834	[M+H]+	Postive	MWOOGOJBHIARFG-UHFFFAOYSA-N	Benzenoids	Phenols	787.853	816.96	666.667	152.97031:269 153.05461:7951 153.96071:251 154.05762:750 154.96613:459 155.10646:1383 155.13008:298 156.97804:444 157.96696:969 158.00351:1187	55.0521:257 65.03716:665 93.03216:328	762.425
methyl 2-ethyl-4-[(3R,4R,5S)-5-hydroxy-4,5-dimethyl-2-oxooxolan-3-yl]-2-methyl-3-oxobutanoate	4.4558	287.147	3460.11	30235.4	181.218	[M+H]+	Postive	VOYCJQSSBDMXNQ-UHFFFAOYNA-N	Lipids and lipid-like molecules	Fatty Acyls	-1	-1	-1	287.08304:409 287.14651:4030 288.08353:276 288.12143:287 288.1507:403 289.07703:248 289.13937:214 291.15753:346		978.209
Isoflavone base + 1O, 1MeO, O-MalonylHex; PlaSMA ID-2734	7.19027	517.135	3963.23	30155.6	180.74	[M+H]+	Postive	RDTAGQKYPGLCBK-UHFFFAOYNA-N	Phenylpropanoids and polyketides	Isoflavonoids	-1	-1	-1	517.13489:8330 517.20477:893 518.13953:2456 519.14404:538 520.14325:201 520.21674:203		961.683
Delphinidin 3-galactoside	5.43882	463.088	2705.35	30049.4	180.103	[M-H]-	Negative	XENHPQQLDPAYIJ-UHFFFAOYNA-O			-1	-1	-1	463.08786:5358 463.21774:399 464.08984:1681 465.10022:292 465.16275:232 467.06799:202 467.13647:213 467.18878:283	300.02985:226	984.928
Heneicosanoic acid	17.1646	325.312	1563.8	29963.8	179.59	[M-H]-	Negative	CKDDRHZIAZRDBW-UHFFFAOYSA-N	Lipids and lipid-like molecules	Fatty Acyls	758.855	748.582	500	325.01544:209 325.09067:244 325.18393:1835 325.31158:1772 326.05902:209 326.18619:675 326.31586:290 326.96042:321 327.03354:279 327.09012:246 328.01767:202 329.02811:418	325.18329:963 325.30902:231	993.444
(2R)-2-[[(2S)-3-methyl-2-[[1-[(2-methylpropan-2-yl)oxycarbonyl]-4-phenylpiperidine-4-carbonyl]amino]pentanoyl]amino]-2-phenylacetic acid	12.4534	552.304	2901.56	29927.1	179.37	[M+H]+	Postive	RJZDRVVVKUSABJ-DYCCLRLQSA-N	Organic acids and derivatives	Peptidomimetics	-1	-1	-1	552.3042:6355 553.26007:381 553.30682:1613 554.30566:330 555.25653:220 555.32843:563 556.3382:461 557.28552:604		962.977
(-)-Epicatechin	4.67047	291.085	3541.31	29885.3	179.12	[M+H]+	Postive	PFTAWBLQPZVEMU-UKRRQHHQSA-N	Phenylpropanoids and polyketides	Flavonoids	392.906	748.377	600	291.08475:8893 291.15839:434 292.08759:1885 292.13071:2892 293.09372:368 293.12952:1668 294.09695:214 294.13101:1273 295.05042:270 295.14734:332	73.02726:360 111.04412:213 123.04341:354 124.04689:246 139.03815:911 147.04251:243 168.48978:220 233.05922:681	999.981
2-(4-Methoxyphenyl)ethyl 6-O-alpha-L-arabinopyranosyl-beta-D-glucopyranoside	4.50548	469.167	4655.36	29883.2	179.107	[M+H]+	Postive	LQUPEGJECBPTCO-KDRUZJHHSA-N	Organic oxygen compounds	Organooxygen compounds	-1	-1	-1	469.11893:277 469.16733:7669 470.03009:277 470.17142:1590 471.03821:460 471.17889:439 472.15665:430		869.175
2-(3,4-dihydroxyphenyl)-5-hydroxy-6,7-dimethoxychromen-4-one	6.45468	331.081	7046.93	29837	178.83	[M+H]+	Postive	IMEYGBIXGJLUIS-UHFFFAOYSA-N	Phenylpropanoids and polyketides	Flavonoids	-1	-1	-1	331.08078:7185 332.08258:2003 333.0856:426 333.12253:488 333.20319:1032	225.05269:217 298.04434:416	938.192
(E)-1,7-bis(4-hydroxyphenyl)hept-1-en-3-one	9.54948	341.139	2686.62	29830.3	178.79	[M-H]-	Negative	IHZRLGRBBLFVBQ-JXMROGBWSA-N	Phenylpropanoids and polyketides	Diarylheptanoids	-1	-1	-1	341.13913:6920 342.14169:1447 343.01608:248 343.14526:275 345.18091:610	167.03468:875	719.573
Flurtamone	6.79592	334.107	3471.64	29722.7	178.145	[M+H]+	Postive	NYRMIJKDBAQCHC-UHFFFAOYNA-N	Benzenoids	Benzene and substituted derivatives	-1	-1	-1	334.10709:8500 334.16199:1204 335.10999:1252 335.15884:249 336.12204:3997 336.62909:219 337.12833:1339 337.18869:393 338.138:5121 338.19312:392 338.33994:2153		926.418
[(2R,3S,4S,5R,6S)-3,4,5-trihydroxy-6-[(2S,3R,4S,5S,6R)-3,4,5-trihydroxy-6-(hydroxymethyl)oxan-2-yl]oxyoxan-2-yl]methyl 9-methyldecanoate	11.8928	528.304	3135.83	29624.4	177.556	[M+H]+	Postive	VTEOBBGFBSSFNH-HIUXYCDVSA-N	Lipids and lipid-like molecules	Saccharolipids	-1	-1	-1	528.30438:6118 529.31073:1870 530.3186:281 533.28485:473		979.019
3-(4-methoxy-6-oxopyran-2-yl)butanoic acid	3.27232	213.074	2734.74	29459.3	176.566	[M+H]+	Postive	GXBVESSBUINHIO-UHFFFAOYSA-N	Organoheterocyclic compounds	Pyrans	-1	-1	-1	213.0079:356 213.07437:4898 213.1212:280 214.07889:572 215.02063:244 215.08981:252 215.10425:233 215.6507:251 216.94756:214 216.96339:242 216.98787:520 217.01556:459 217.9886:243 218.03178:2177		995.406
PRECOCENE II	7.09302	221.117	7286.85	29437.8	176.438	[M+H]+	Postive	PTIDGSWTMLSGAH-UHFFFAOYSA-N	Organoheterocyclic compounds	Benzopyrans	-1	-1	-1	221.11694:8762 222.11986:995 223.98782:625	165.05466:250	949.775
1-Isothiocyanato-9-(methylsulfinyl)-nonane	0.724867	248.113	3616.72	29395.9	176.186	[M+H]+	Postive	MQFLXLMNOHHPTC-UHFFFAOYNA-N	Organosulfur compounds	Sulfoxides	-1	-1	-1	248.11305:3169 249.11401:384 249.155:479 250.09058:392 250.1234:251 251.07584:1244 251.1313:204 252.07651:329 252.10788:2533 253.07455:963		899.513
(2S,3S,4S,5R,6S)-6-[2-(3,4-dihydroxyphenyl)-5,7-dihydroxy-4-oxochromen-3-yl]oxy-3,4,5-trihydroxyoxane-2-carboxylic acid	5.53163	479.081	3657.66	29395.3	176.183	[M+H]+	Postive	DUBCCGAQYVUYEU-ZUGPOPFOSA-N	Phenylpropanoids and polyketides	Flavonoids	-1	-1	-1	479.08139:5851 479.15091:249 479.25876:411 480.08386:1228 480.15836:207 481.08273:503 483.14105:256 483.17206:377		988.576
Phosphatidylethanolamine 16	14.6037	714.506	2731.19	29372.1	176.044	[M-H]-	Negative	HGDJXBPLHZFXGO-LBXGSASVNA-N	Lipids and lipid-like molecules	Glycerophospholipids	-1	-1	-1	714.50586:6300 715.13556:632 715.4519:511 715.50879:3091 716.14124:286 716.21497:225 716.51459:857 717.46222:687 718.40015:289 718.48352:240 719.13055:287		920.838
(5R)-5-hydroxy-1-(4-hydroxy-3-methoxyphenyl)decan-3-one	10.1195	277.18	2979.97	29358.5	175.962	[M+H]+	Postive	NLDDIKRKFXEWBK-UHFFFAOYNA-N	Benzenoids	Phenols	-1	-1	-1	277.17987:5503 278.18347:728 279.19028:280 279.2305:315 281.20432:297		912.952
Cinnamaldehyde	7.84435	133.065	2104.08	29341.7	175.862	[M+H]+	Postive	KJPRLNWUNMBNBZ-UHFFFAOYSA-N	Phenylpropanoids and polyketides	Cinnamaldehydes	-1	-1	-1	133.06471:3166 133.09883:404 134.06639:586 135.11337:220 137.05847:234 137.09511:266 137.96385:444	51.02205:269	804.089
[3,4-dihydroxy-4-(7-methoxy-2-oxochromen-8-yl)-2-methylidenebutyl] 3-methylbutanoate	5.54963	399.141	2655.53	29329.6	175.789	[M+H]+	Postive	RPWASDJXFDDBFQ-UHFFFAOYNA-N	Phenylpropanoids and polyketides	Coumarins and derivatives	-1	-1	-1	399.14133:2282 399.17755:813 399.22803:265 400.14145:996 401.15433:748 401.20383:285 403.13611:479	202.05434:205 257.15024:387 399.1373:338	964.57
Hydroxysuberic acid; PlaSMA ID-224	0.923617	189.077	2280.35	28903.9	173.238	[M-H]-	Negative	ARJZZFJXSNJKGR-UHFFFAOYNA-N	Organic acids and derivatives	Hydroxy acids and derivatives	-1	-1	-1	188.86067:386 188.97021:208 189.07689:2959 189.85733:5636 190.08:282 191.0547:1357 191.85335:1015 192.95798:725 193.04985:272 193.06941:337 193.95718:219	61.98856:668 143.86487:680	949.689
Gardneramine	6.7025	413.207	3227.26	28877.1	173.077	[M+H]+	Postive	RIMDDIPKIZTBHU-KPDHXFAYSA-N	Organoheterocyclic compounds	Indoles and derivatives	-1	-1	-1	413.11902:225 413.17233:565 413.20688:8061 413.67459:225 414.125:284 414.15305:253 414.2095:2178 415.13733:680 415.21637:756 416.14114:232 417.15454:682 417.18698:347 417.22308:226 418.1571:234		962.678
3-hydroxy-3,4-bis[(4-hydroxy-3-methoxyphenyl)methyl]oxolan-2-one	7.43945	392.17	3031.55	28870.7	173.038	[M+NH4]+	Postive	ZITBJWXLODLDRH-UHFFFAOYNA-N	Lignans, neolignans and related compounds	Furanoid lignans	-1	-1	-1	392.16998:6720 393.17395:2035 393.22076:344 394.16565:3430 394.25949:201 395.16519:1213 395.20468:200 396.17575:270 397.12457:6991		990.775
3-(5,9-Dimethyl-4-oxo-8-oxatetracyclo[7.2.1.1~7,10~.0~1,6~]tridec-2-en-5-yl)propanoic acid	6.5468	273.148	3093.87	28861.1	172.981	[M+H]+	Postive	RQCNJFMDDXEKEP-UHFFFAOYSA-N	Organoheterocyclic compounds	Oxepanes	-1	-1	-1	273.07806:1130 273.11124:2215 273.14795:6622 274.1167:369 274.15134:1312 274.27414:721 275.10422:428 275.16373:10761 276.14072:273 276.16827:1497 277.00601:284 277.17191:538		964.7
[3,4,5-trihydroxy-6-(hydroxymethyl)oxan-2-yl] 3-hydroxy-4,5-dimethoxybenzoate	3.11658	378.138	2670.99	28666.2	171.813	[M+H]+	Postive	CXFDTBRNJQYDLK-UHFFFAOYNA-N	Phenylpropanoids and polyketides	Tannins	-1	-1	-1	378.13834:4700 379.14261:621 383.09326:4813		925.321
Phosphatidylethanolamine 18	14.4353	738.507	3042.47	28661.6	171.786	[M-H]-	Negative	WDBJINMJHHHMJV-WRGXGLASNA-N	Lipids and lipid-like molecules	Glycerophospholipids	-1	-1	-1	738.35693:227 738.3847:205 738.50677:8172 739.35706:247 739.51019:3696 740.24475:230 740.51361:1579 741.51648:401 742.38153:254		981.038
3-Methyluridine	0.724867	259.084	2898.71	28605.7	171.45	[M+H]+	Postive	UTQUILVPBZEHTK-ZOQUXTDFSA-N	Nucleosides, nucleotides, and analogues	Pyrimidine nucleosides	-1	-1	-1	259.03635:242 259.08374:3909 260.0853:718 260.11276:2709 261.03476:516 261.11551:527 261.17859:1070 262.18582:350 263.12616:230 264.07281:709		975.961
Cyclopenta[c]pyran-4-carboxylic acid, 7-[(acetyloxy)methyl]-1-(beta-D-glucopyranosyloxy)-1,4a,5,7a-tetrahydro-5-hydroxy-, (1S,4aS,5S,7aS)-	4.26892	455.116	3292.26	28524.3	170.963	[M+H]+	Postive	DGDWCRWJRNMRKX-UHFFFAOYNA-N	Lipids and lipid-like molecules	Prenol lipids	-1	-1	-1	455.1156:5281 455.14154:4346 456.11652:1586 456.13861:941 457.15079:616 457.77176:203 458.19897:207		854.756
LPC 18:3; PlaSMA ID-2742	12.2354	518.323	2991.67	28301.7	169.629	[M+Na]+	Postive	MRTUWVDDQVMUCR-UHFFFAOYNA-N	Lipids and lipid-like molecules	Glycerophospholipids	-1	-1	-1	518.323:6343 519.3277:2141 520.33032:626		900.529
Perondroprilat	12.4534	341.206	2651.93	28282.6	169.514	[M+H]+	Postive	ODAIHABQVKJNIY-PEDHHIEDSA-N	Organic acids and derivatives	Carboxylic acids and derivatives	-1	-1	-1	341.20596:4818 342.21109:1924 345.20712:241	283.26202:955	928.944
Cortell	10.3376	405.225	2241.2	28245	169.289	[M+H]+	Postive	ALEXXDVDDISNDU-JZYPGELDSA-N	Lipids and lipid-like molecules	Steroids and steroid derivatives	-1	-1	-1	405.22482:4253 406.2261:915 407.18637:222 407.23312:553 409.15515:212 409.25482:2699		988.732
[truncated: 617 more rows]

## Sheet: Table S4
Supplementary Figure S4. Compounds shared by the filter-sterilized and autoclaved media.							Rf/Ra
[truncated: 207 more rows]
